# Supplementary material for: Deep Transcriptome Analysis Reveals Reactive Oxygen Species (ROS) Network Evolution, Response to Abiotic Stress, and Regulation of Fiber Development in Cotton
Source: MDPI journal article supplement (doi:10.3390/ijms20081863), 2019-04-15

**Supplementary Figure 3 GO enrichment analysis of M85 and CRI12 under alkali-salt stress.** the most enriched GO terms were indicated in A-L

Figure legends of DEGs enrichment analysis.

| Figure | Species | Tissue | Time point post to treatment |
|--------|---------|--------|------------------------------|
| A      | M85     | Leaf   | 3h                           |
| B      | M85     | Leaf   | 12h                          |
| C      | M85     | Leaf   | 48h                          |
| D      | M85     | Root   | 3h                           |
| E      | M85     | Root   | 12h                          |
| F      | M85     | Root   | 48h                          |
| G      | CRI12   | Leaf   | 3h                           |
| H      | CRI12   | Leaf   | 12h                          |
| I      | CRI12   | Leaf   | 48h                          |
| J      | CRI12   | Root   | 3h                           |
| K      | CRI12   | Root   | 12h                          |
| L      | CRI12   | Root   | 48h                          |

A

## The Most Enriched Go Terms

GO Terms

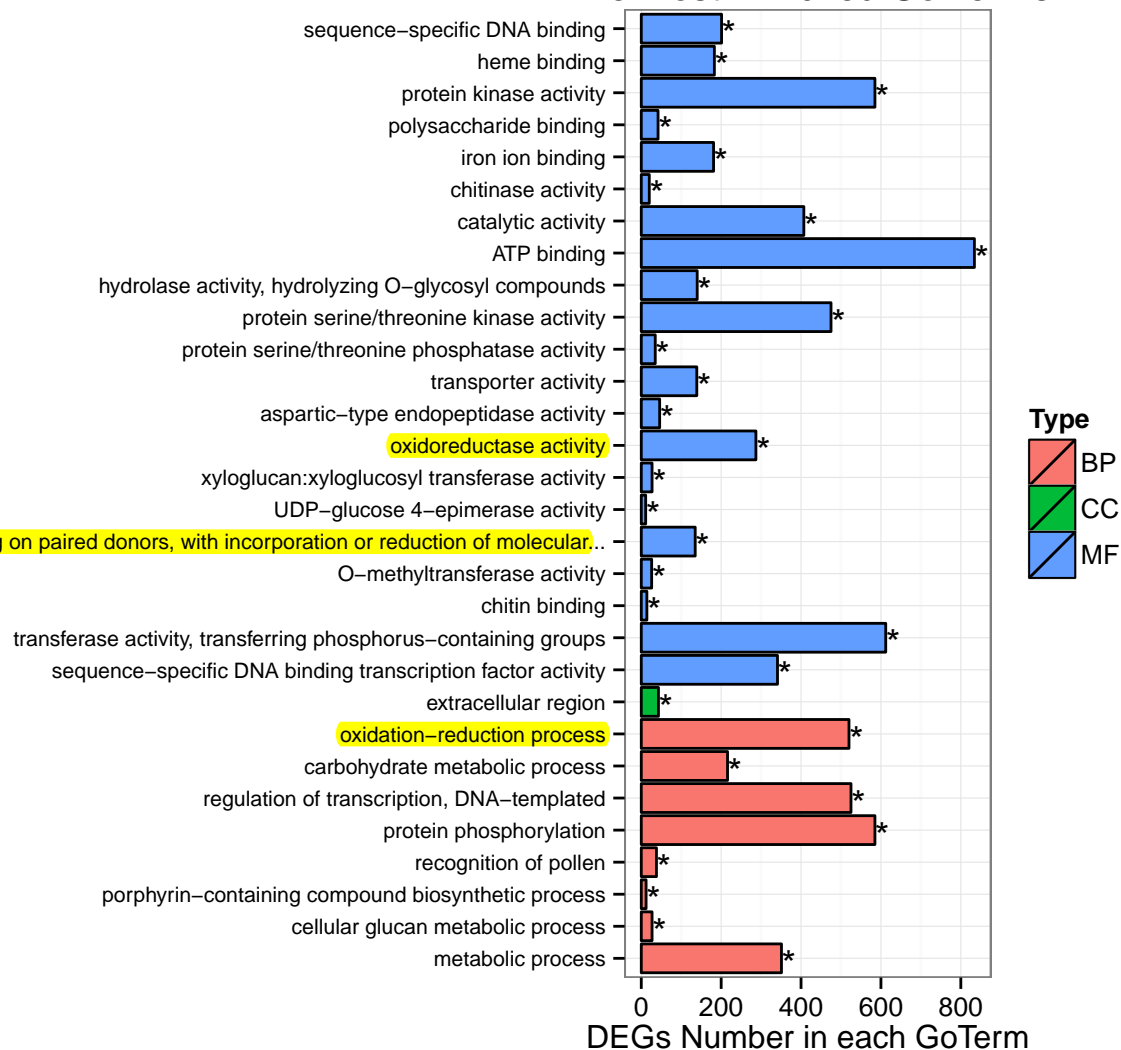

B

GO Terms

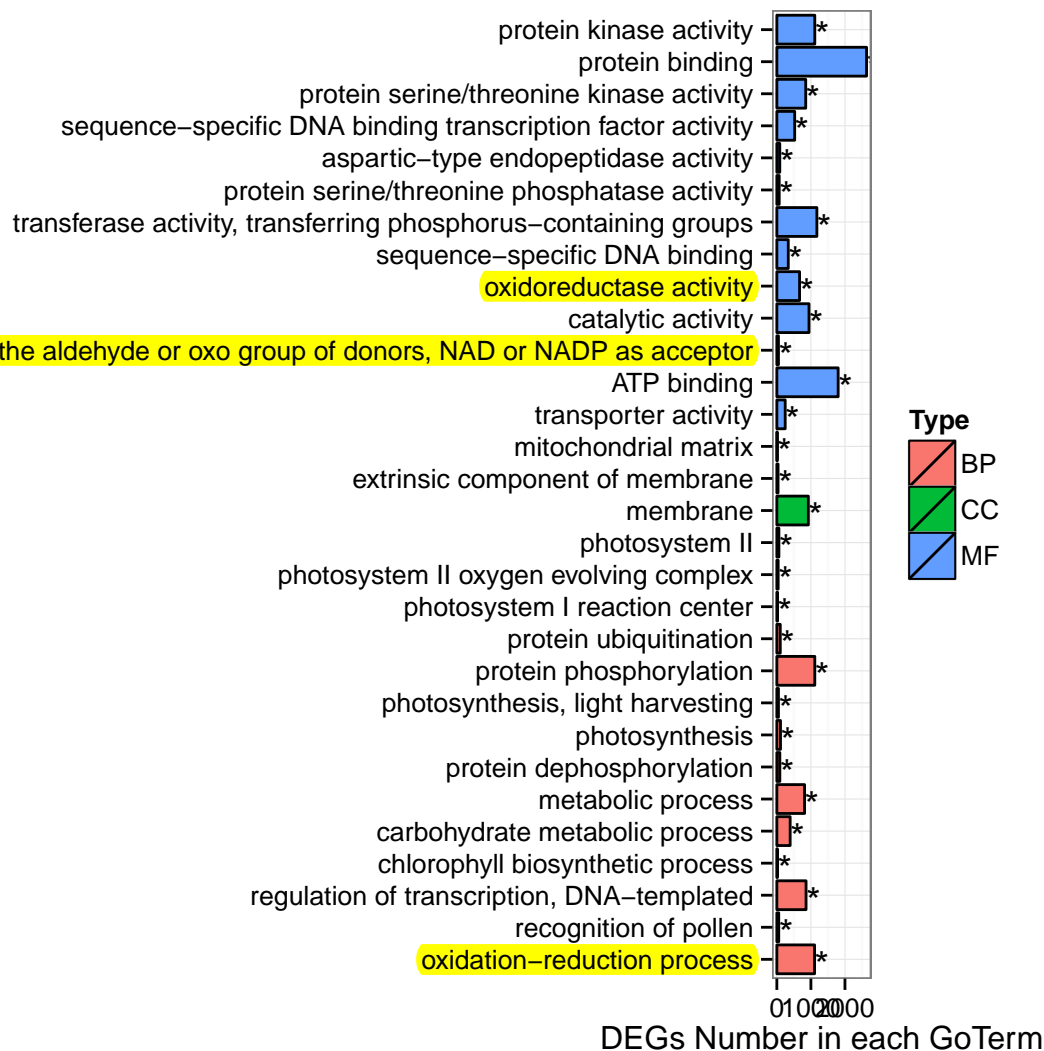

C

GO Terms

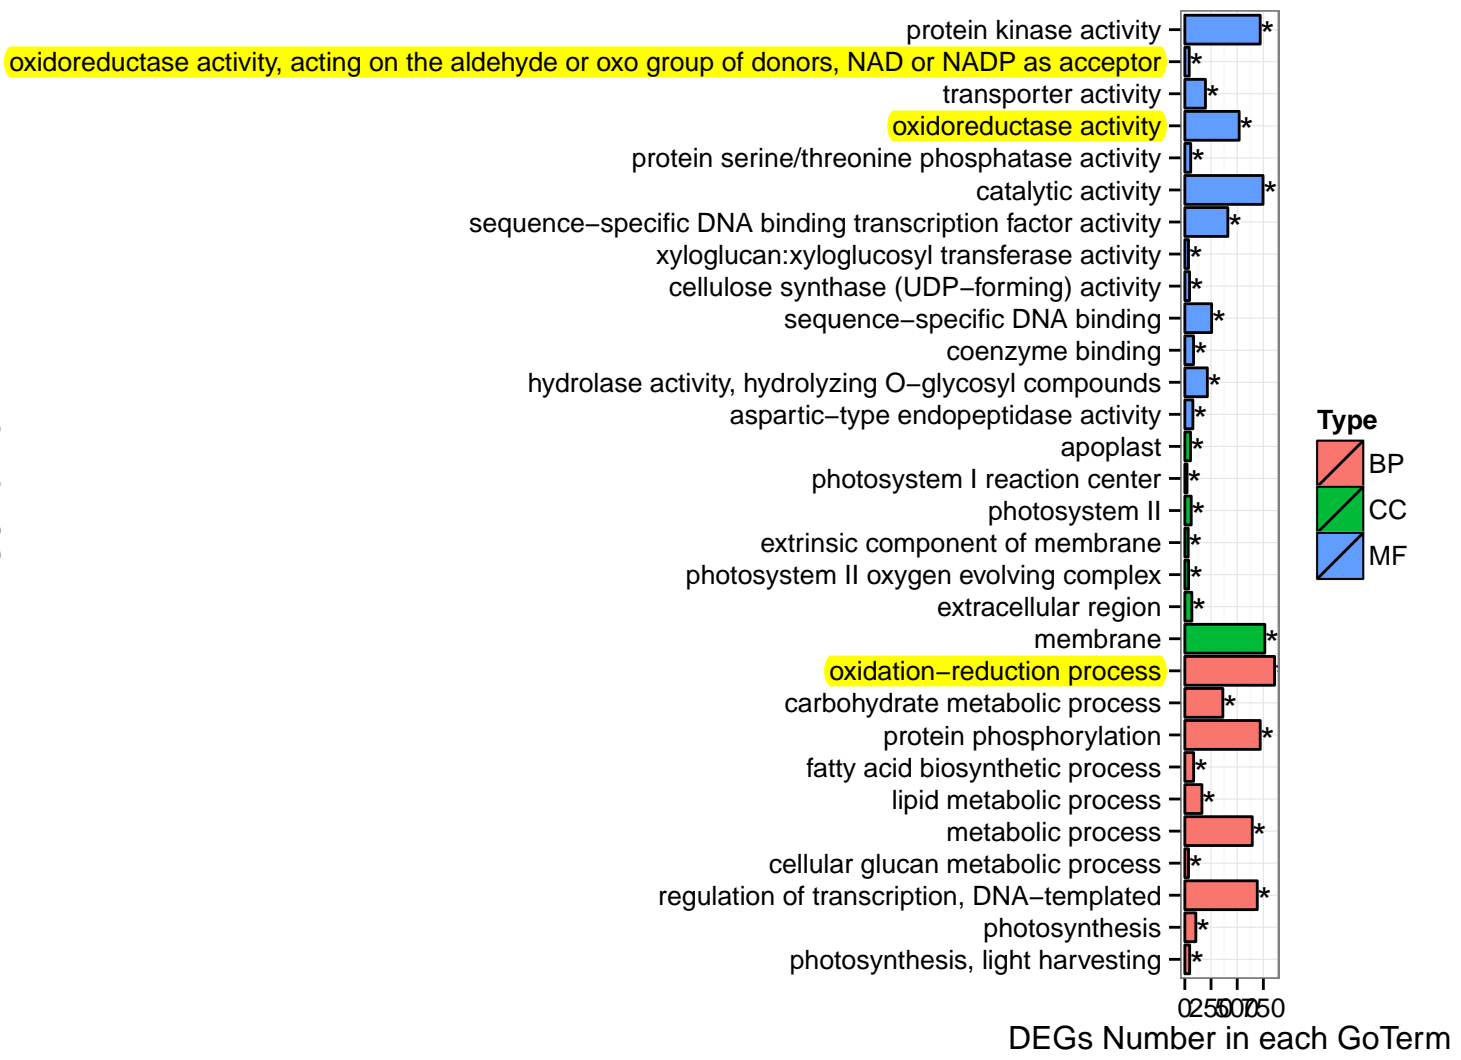

D

GO Terms

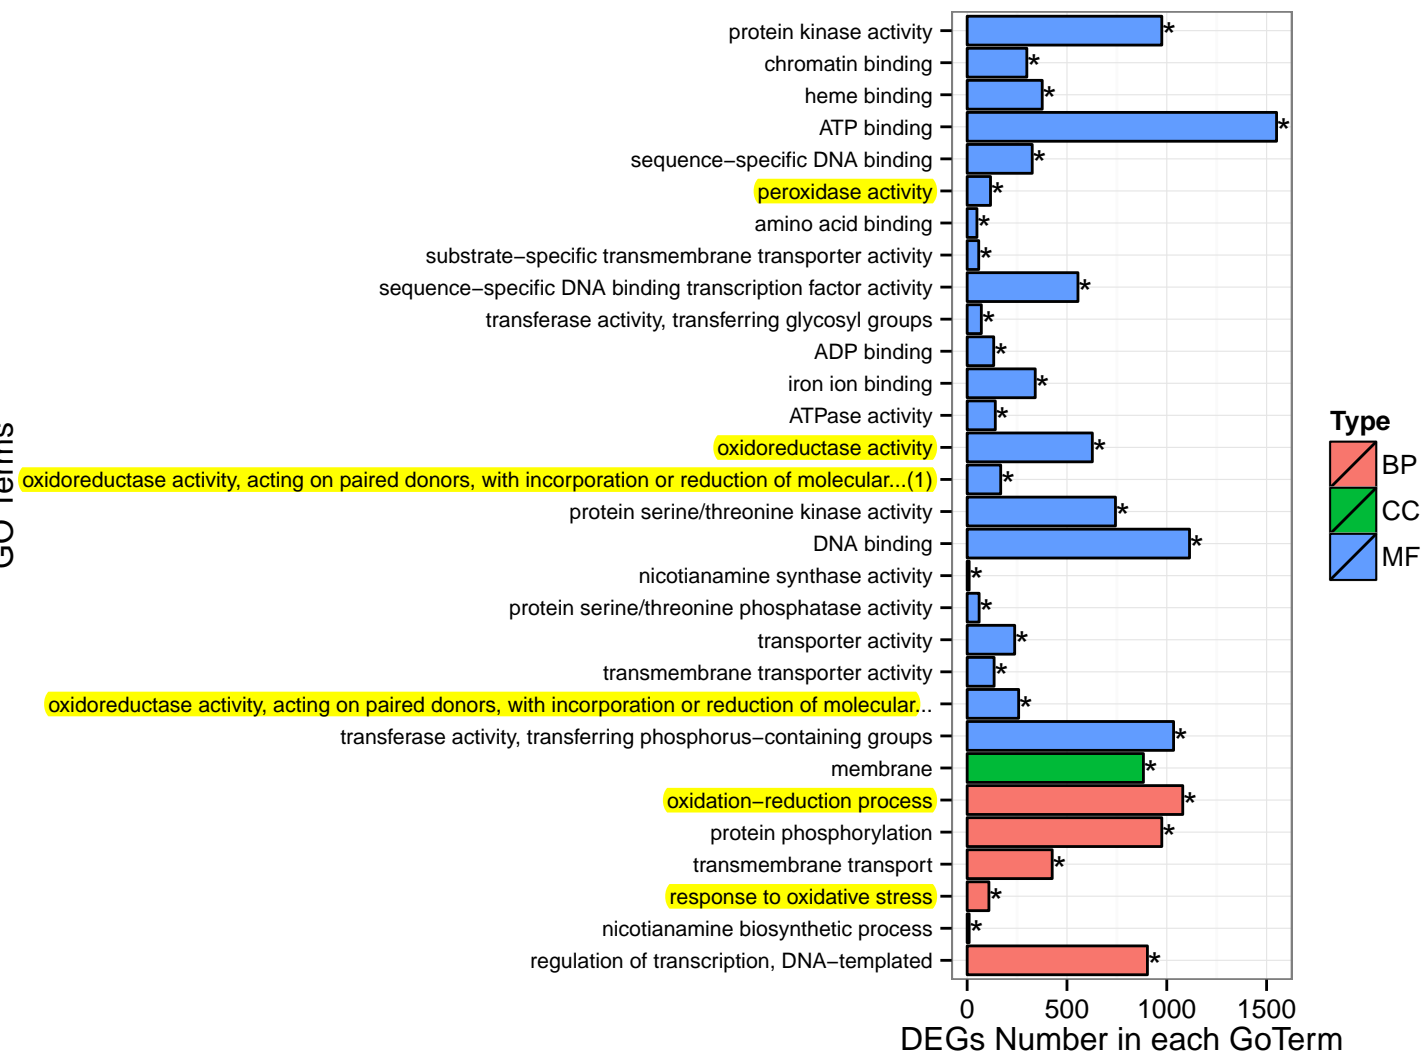

E

GO Terms

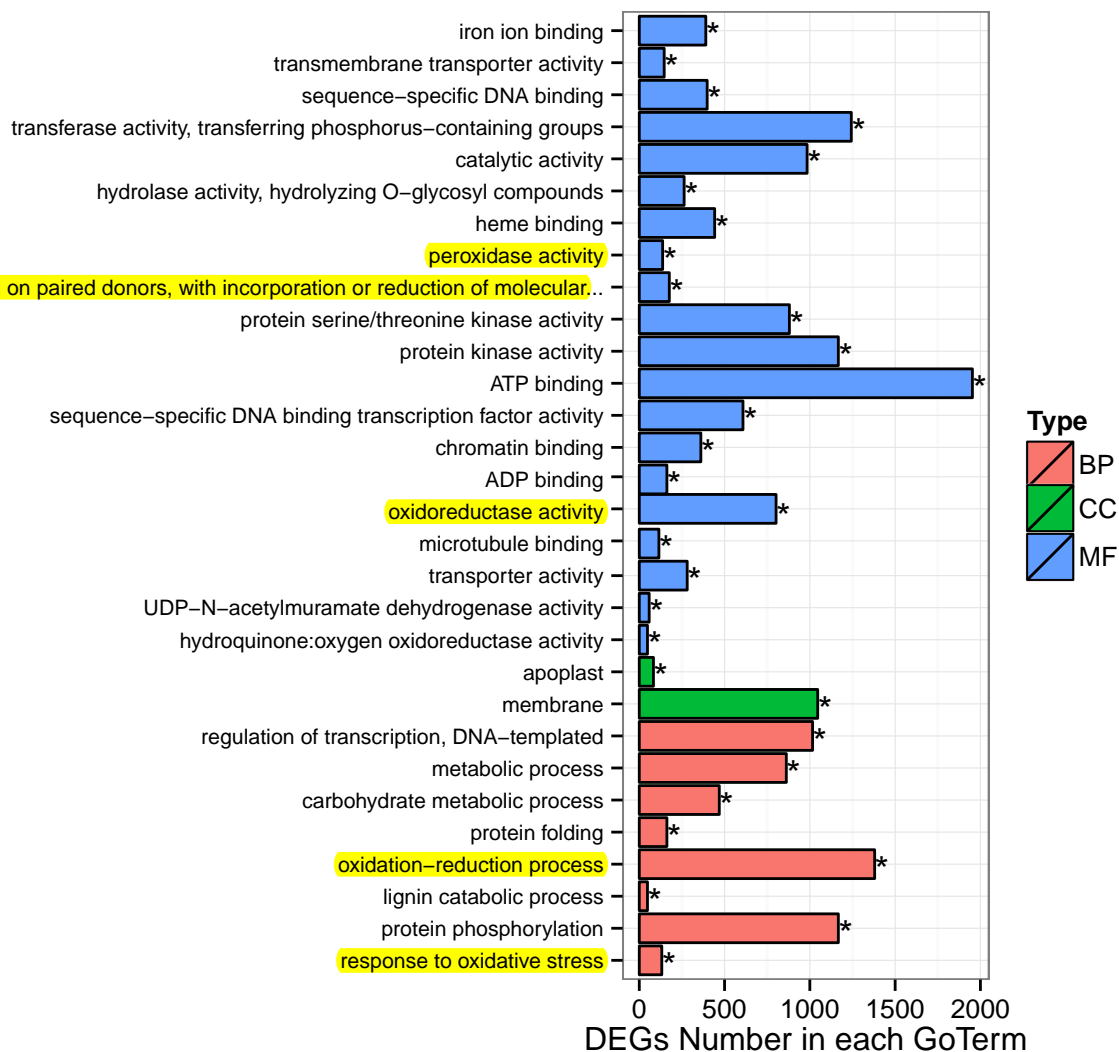

F

GO Terms

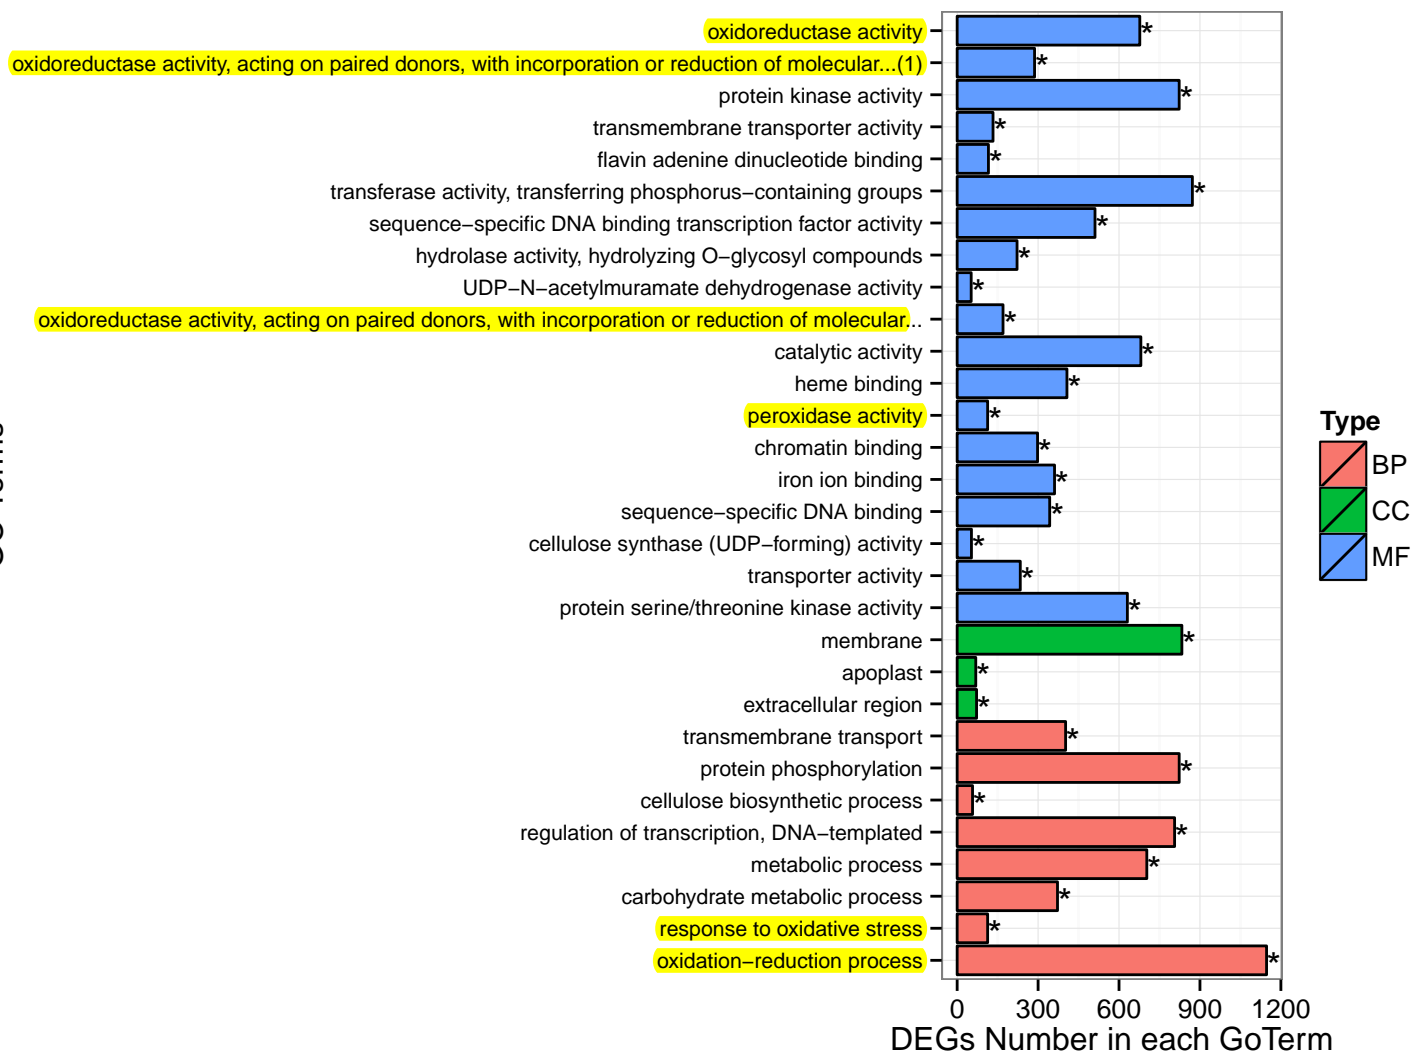

G

GO Terms

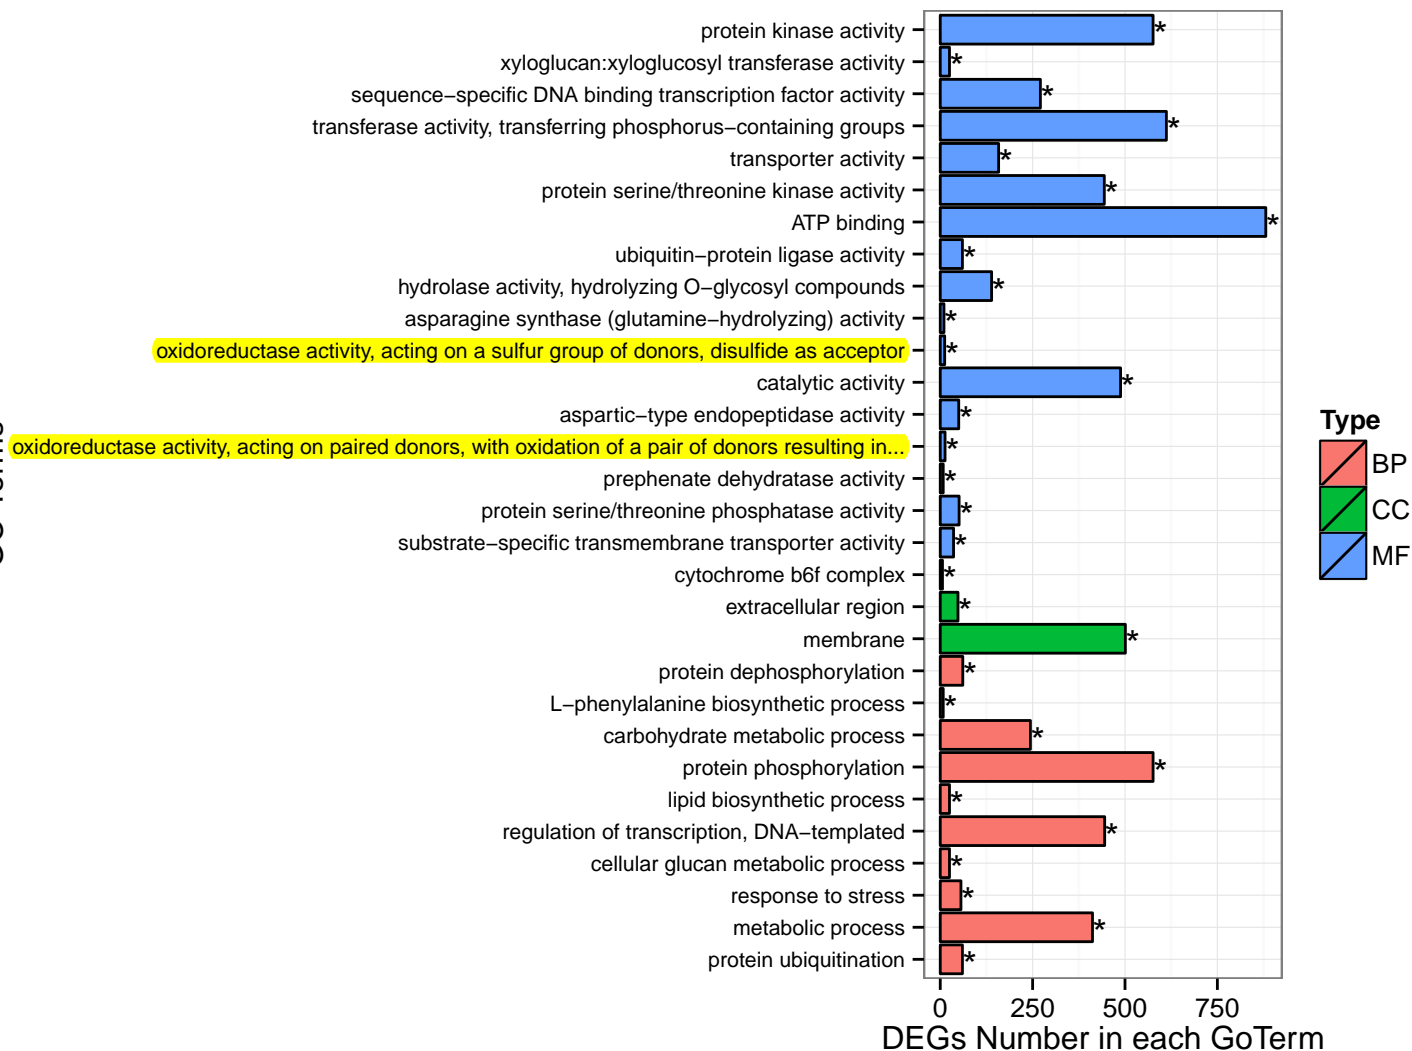



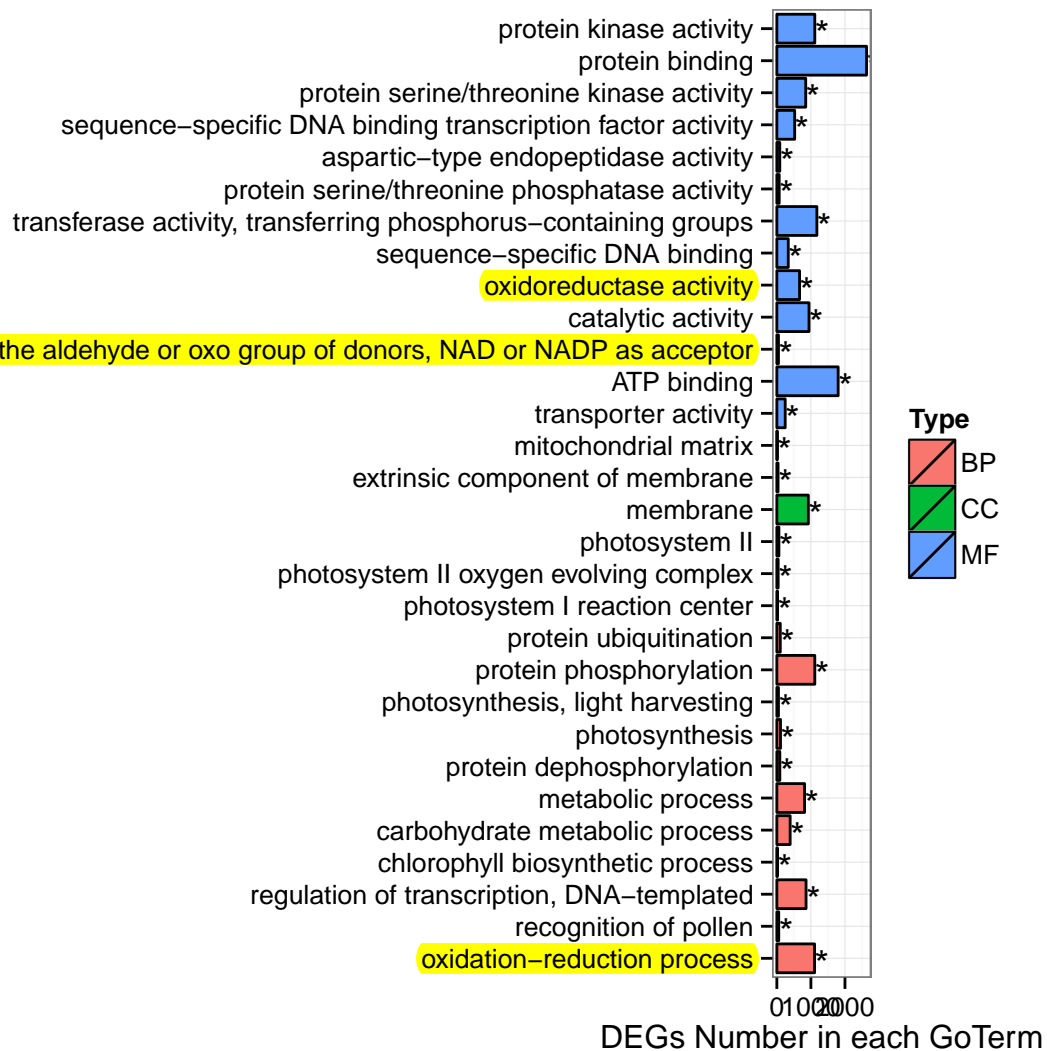

I

GO Terms

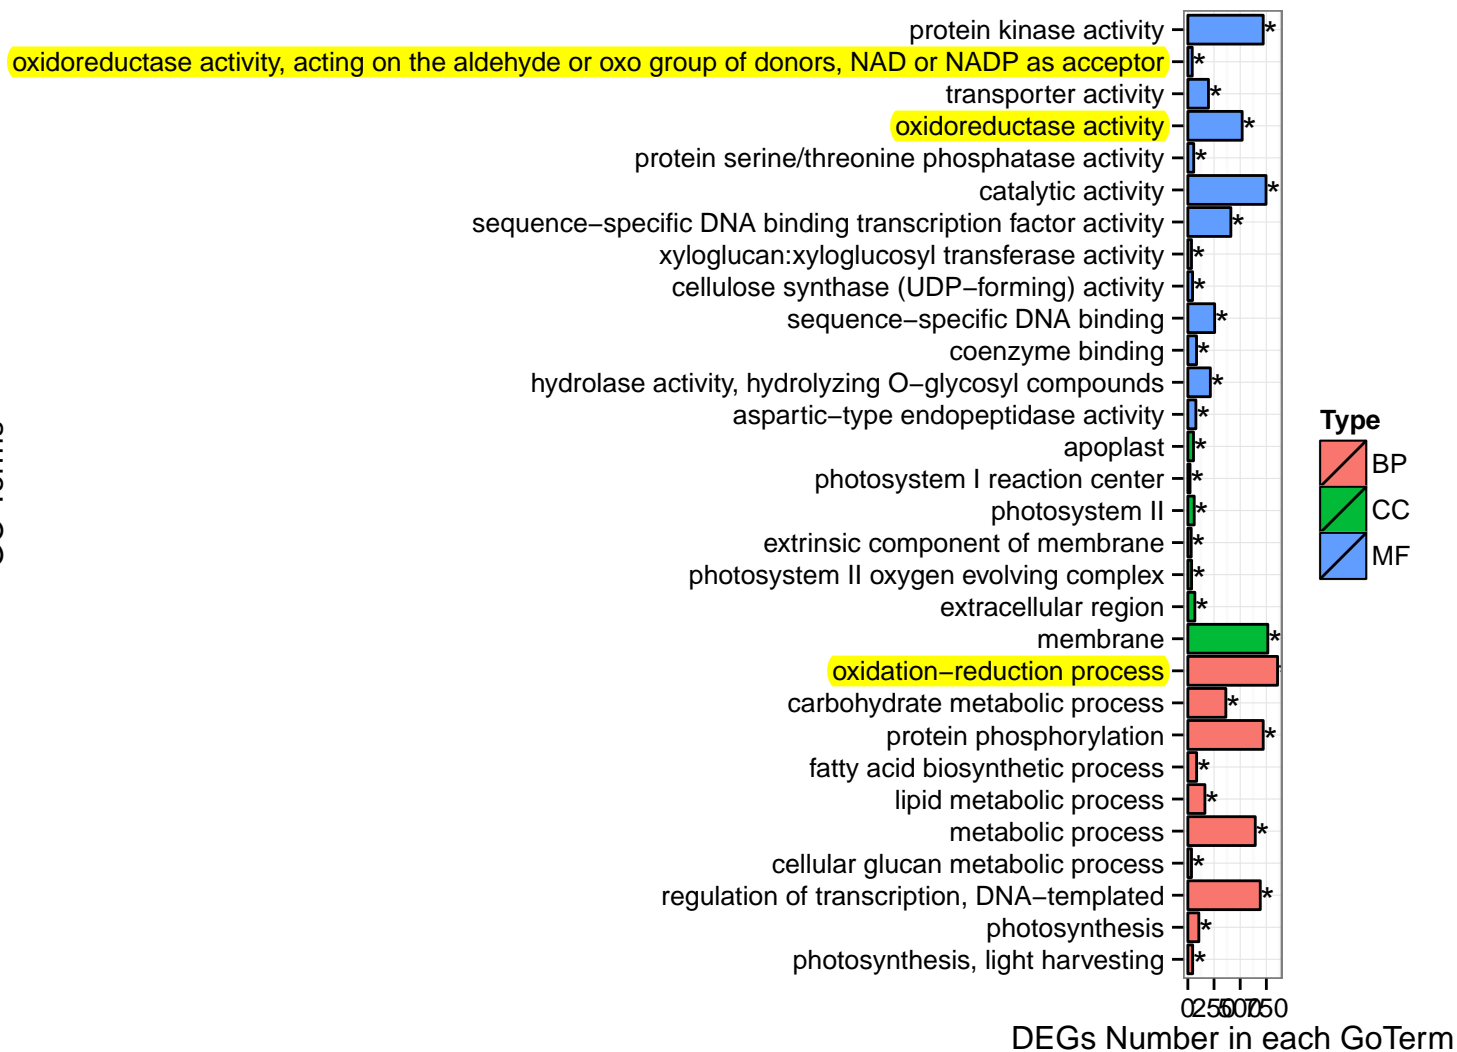

J

GO Terms

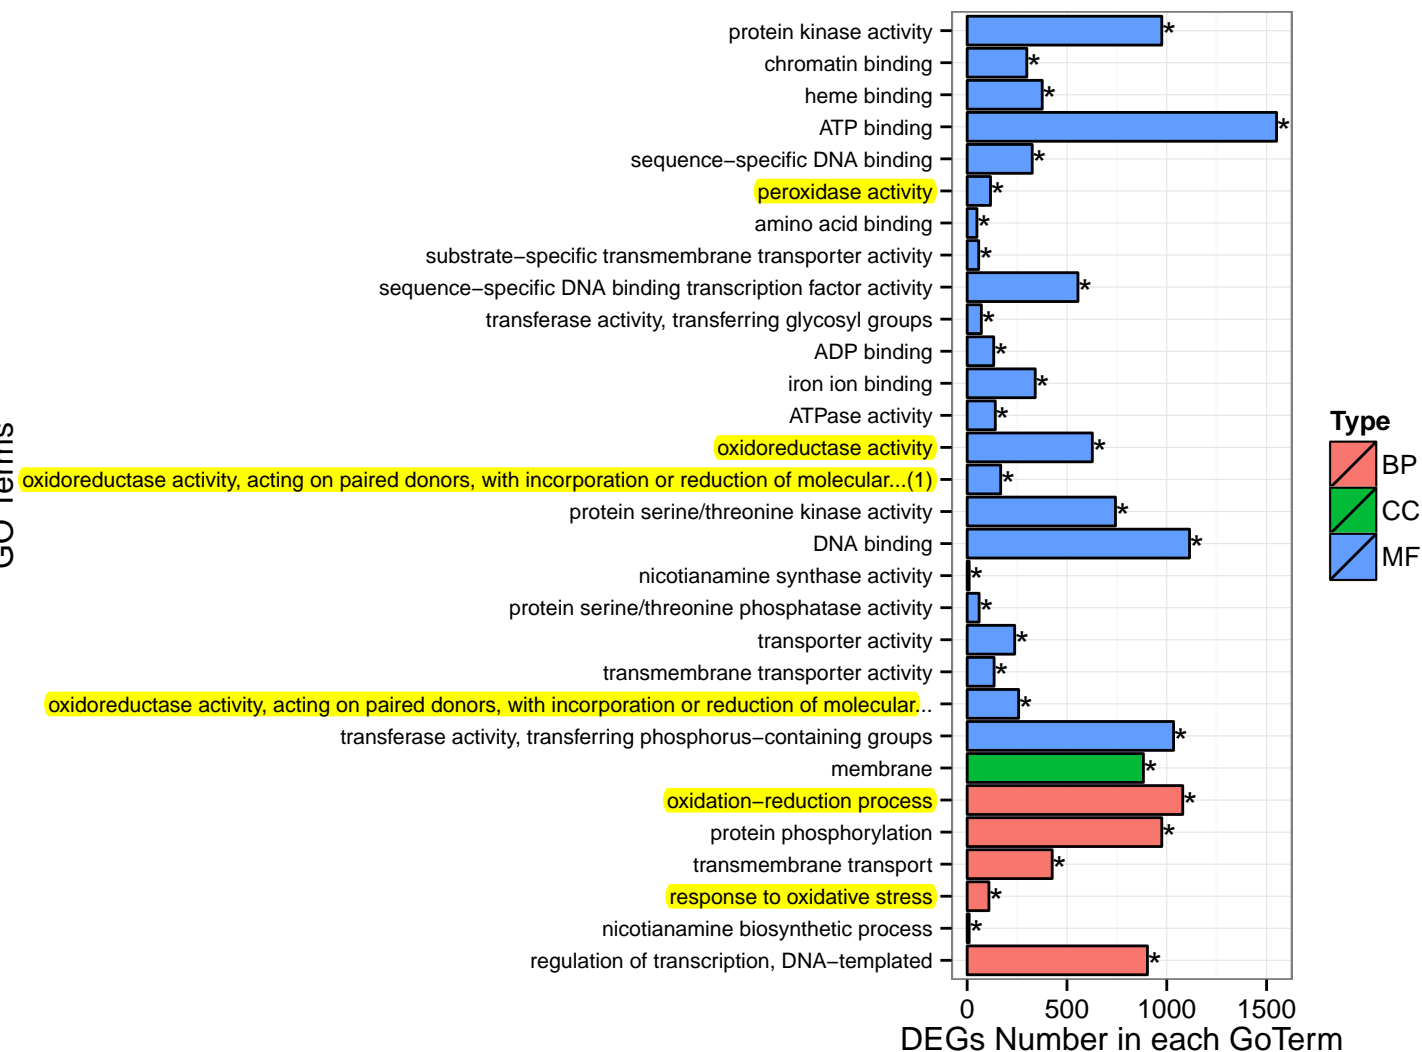

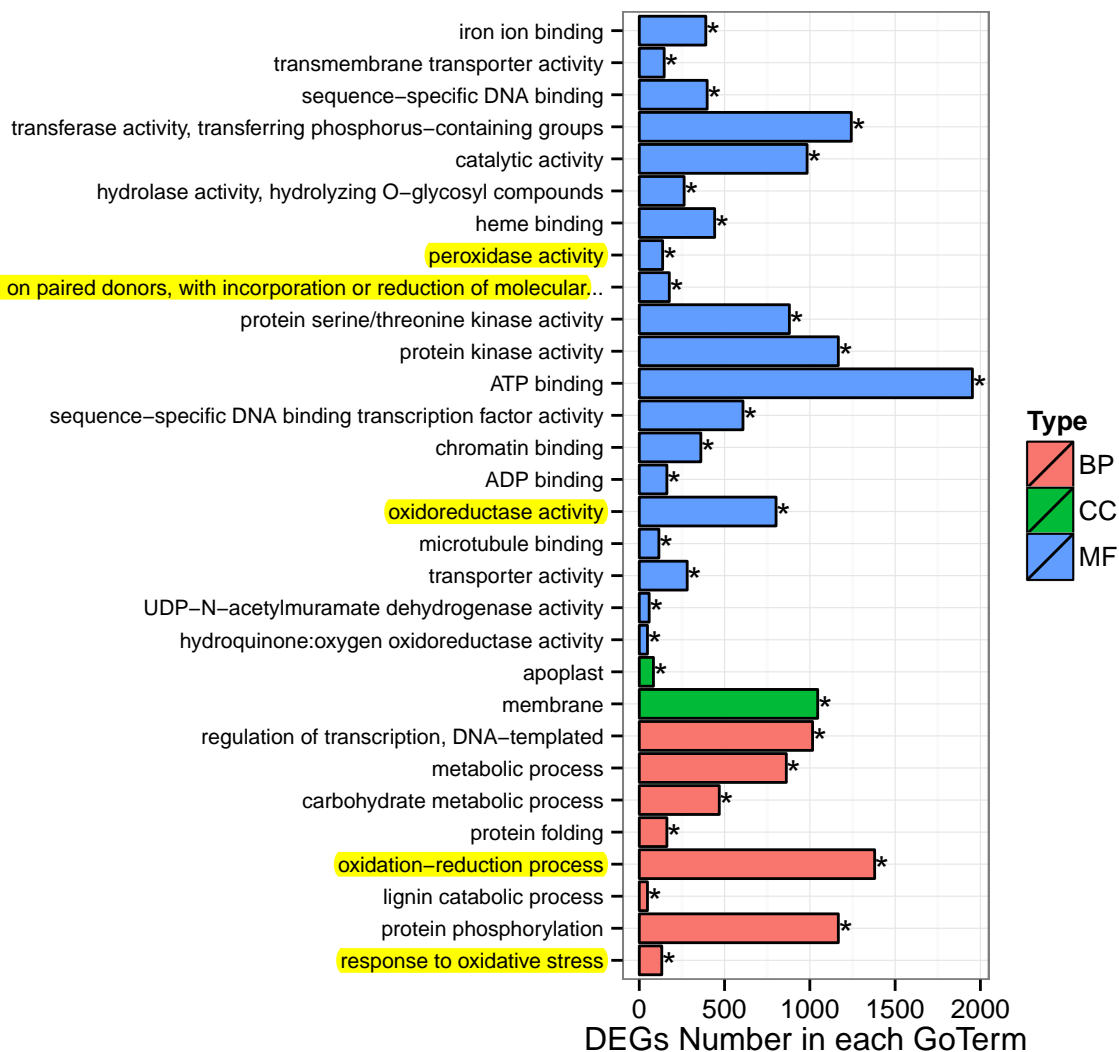

L

GO Terms

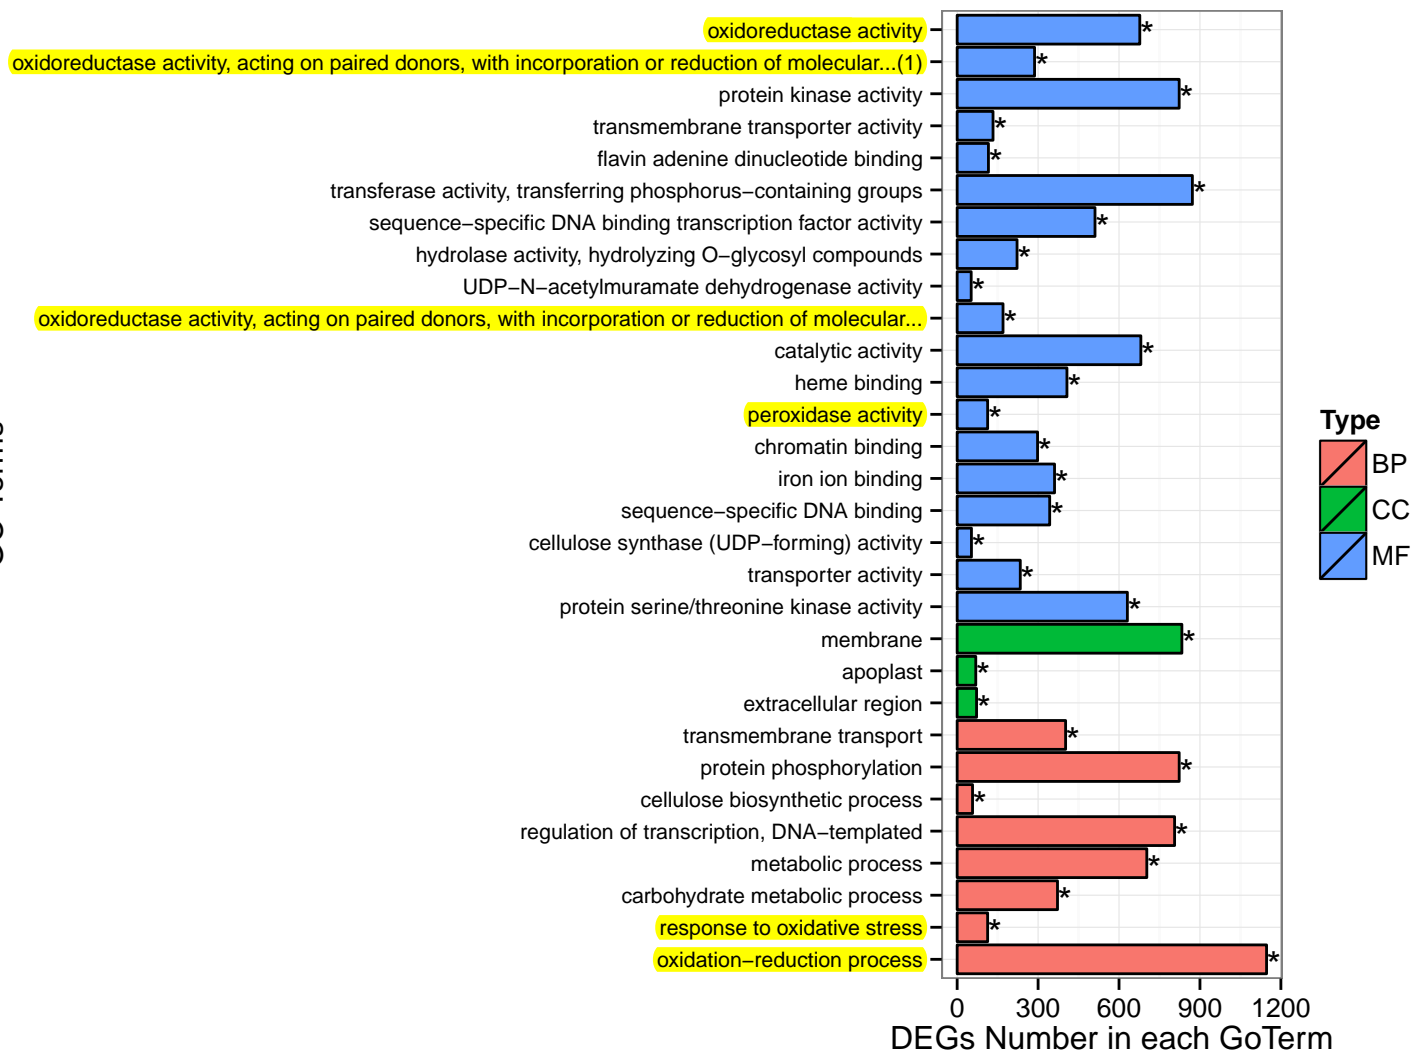

Supplement: s1 [file s1]
