# Supplementary material for: Deep Transcriptome Analysis Reveals Reactive Oxygen Species (ROS) Network Evolution, Response to Abiotic Stress, and Regulation of Fiber Development in Cotton
Source: Int J Mol Sci. 2019 Apr 15;20(8):1863. doi: 10.3390/ijms20081863 (PMC6514600; doi:10.3390/ijms20081863)
Supplement: Supplementary file 1 [file ijms-20-01863-s001.zip]

Archive with 10 entries (10 files):
- Supplementary files/Figure S1.pdf
- Supplementary files/Table S1.xlsx
- Supplementary files/Table S2.xlsx
- Supplementary files/Table S3.xlsx
- Supplementary files/Table S4.xlsx
- Supplementary files/Table S5.xlsx
- Supplementary files/Table S6.xlsx
- Supplementary files/Table S7.xlsx
- Supplementary files/Table S8.xlsx
- Supplementary files/Table S9.docx
