# Supplementary material for: Deep Transcriptome Analysis Reveals Reactive Oxygen Species (ROS) Network Evolution, Response to Abiotic Stress, and Regulation of Fiber Development in Cotton
Source: Int J Mol Sci. 2019 Apr 15;20(8):1863. doi: 10.3390/ijms20081863 (PMC6514600; doi:10.3390/ijms20081863)
Supplement: Supplementary file 1 [file ijms-20-01863-s001.zip › Supplementary files/Table S1.xlsx]

## Sheet: Sheet1
Table S1: Characteristics of genes of ROS network in Gossypium hirsutum, G. arboreum and G. raimondii.
Enzyme and Reaction	Species	Gene ID	*Gene Duplication Type	Description	Chromosome	Start	End	Strand	Gene Length (bp)	Transcript Length (bp)	CDS Length (bp)	Exon Number	Protein Length (aa)	Molecular Weight (kDa)	Charge	Isoelectric Point	Grand Average of Hydropathy	Domain Number	Associated Domain List		Subject ID	Query Coverage (%)	E value	Identity (%)
Superoxide Dismutase (SOD)	G. arboretum	Cotton_A_30467	Dispersed	Superoxide dismutase [Cu-Zn] 2	Chr04	58314910	58317769	+	2860	456	456	7	151	15.475	4.5	7.436	-0.123	1	PF00080 (1);		AT5G18100.1	96	2e-70	70
O2- + O2- + 2H+ → H2O2 + O2		Cotton_A_24238	Dispersed	Superoxide dismutase [Cu-Zn]	Chr13	34194184	34196566	+	2383	1333	459	7	152	15.34	-4	5.423	-0.309	1	PF00080 (1);		AT1G08830.1	96	2e-86	85
		Cotton_A_32487	Dispersed	Superoxide dismutase [Cu-Zn], chloroplastic	Chr10	66118430	66120830	-	2401	645	645	8	214	22.105	0	6.505	-0.028	1	PF00080 (1);		AT2G28190.1	97	2e-108	77
		Cotton_A_36793	Dispersed	Superoxide dismutase [Cu-Zn], chloroplastic	Chr09	1109689	1112847	-	3159	1217	675	8	224	23.232	3.5	7.01	-0.011	1	PF00080 (1);		AT2G28190.1	88	5e-103	76
		Cotton_A_21978	Dispersed	Superoxide dismutase [Cu-Zn]	Chr08	126578106	126579386	-	1281	609	609	7	202	20.895	-2	6.154	0.076	1	PF00080 (1);		AT1G08830.1	73	7e-85	82
		Cotton_A_03623	Dispersed	Superoxide dismutase [Fe] 2, chloroplastic	Chr01	66936792	66939676	+	2885	930	930	9	309	35.646	-15	4.57	-0.659	2	PF00081 (1); PF02777 (1);		AT5G51100.1	90	2e-142	69
		Cotton_A_26478	Dispersed	Superoxide dismutase [Fe] 3, chloroplastic	Chr13	2099221	2102441	-	3221	1250	771	8	256	29.329	0.5	6.635	-0.277	2	PF00081 (1); PF02777 (1);		AT5G23310.1	99	3e-138	73
		Cotton_A_04050	Dispersed	Superoxide dismutase [Mn], mitochondrial	Chr10	81012722	81015489	-	2768	693	693	6	230	25.704	4.5	7.978	-0.363	2	PF00081 (1); PF02777 (1);		AT3G10920.1	99	1e-138	81
		Cotton_A_21263	Dispersed	Superoxide dismutase [Mn], mitochondrial	Chr09	3364759	3366909	-	2151	696	696	6	231	25.942	7	8.847	-0.324	2	PF00081 (1); PF02777 (1);		AT3G10920.1	99	3e-134	79
	G. raimondii	Gorai.007G261100	Dispersed	Superoxide dismutase [Cu-Zn] 2	Chr07	43021117	43024908	+	3792	1558	486	7	161	16.454	3.5	7.126	-0.165	1	PF00080 (1);		AT5G18100.1	96	3e-80	75
		Gorai.013G192900	WGD/segmental	Superoxide dismutase [Cu-Zn]	Chr13	49396133	49398883	+	2751	1059	636	8	211	22.012	-1.5	6.219	0.018	2	PF00080 (2);		AT1G08830.1	86	4e-83	71
		Gorai.006G104900	WGD/segmental	Superoxide dismutase [Cu-Zn], chloroplastic	Chr06	34720308	34723354	-	3047	1304	753	7	250	26.388	6	7.453	-0.153	1	PF00080 (1);		AT2G28190.1	78	2e-90	72
		Gorai.009G090300	WGD/segmental	Superoxide dismutase [Cu-Zn], chloroplastic	Chr09	6585677	6588516	-	2840	1350	636	7	211	22.388	2.5	6.903	-0.061	1	PF00080 (1);		AT2G28190.1	78	2e-91	79
		Gorai.013G116800	WGD/segmental	Superoxide dismutase [Cu-Zn]	Chr13	28906941	28910154	-	3214	1345	459	6	152	15.113	-0.5	6.409	-0.095	1	PF00080 (1);		AT1G08830.1	100	7e-90	84
		Gorai.001G052700	Dispersed	Superoxide dismutase [Fe] 2, chloroplastic	Chr01	5004560	5008855	+	4296	1798	930	10	309	35.529	-15	4.574	-0.625	2	PF00081 (1); PF02777 (1);		AT5G51100.1	90	2e-143	71
		Gorai.013G068400	Dispersed	Superoxide dismutase [Fe] 3, chloroplastic	Chr13	7919077	7922556	-	3480	1404	771	9	256	29.256	-0.5	6.401	-0.315	2	PF00081 (1); PF02777 (1);		AT5G23310.1	99	5e-137	73
		Gorai.009G293300	WGD/segmental	Superoxide dismutase [Mn], mitochondrial	Chr09	25425806	25429022	-	3217	1166	693	6	230	25.695	4.5	7.977	-0.37	2	PF00081 (1); PF02777 (1);		AT3G10920.1	99	3e-138	80
		Gorai.011G207900	WGD/segmental	Superoxide dismutase [Mn], mitochondrial	Chr11	49976860	49979552	-	2693	1230	696	6	231	26.011	8	9.161	-0.361	2	PF00081 (1); PF02777 (1);		AT3G10920.1	99	5e-135	79
	G. hirsutum	Gh_A11G2096	WGD/segmental	Superoxide dismutase [Cu-Zn] 2	A11	67392336	67395193	+	2858	462	462	7	153	15.735	4.5	7.385	-0.188	1	PF00080 (1);		AT5G18100.1	96	2e-73	72
		Gh_D11G2412	WGD/segmental	Superoxide dismutase [Cu-Zn] 2	D11	48123478	48125573	+	2096	468	468	6	155	15.98	4.5	7.408	-0.245	1	PF00080 (1);		AT5G18100.1	95	2e-76	75
		Gh_A13G1450	WGD/segmental	Superoxide dismutase [Cu-Zn]	A13	72215416	72228650	+	13235	486	486	7	161	16.391	-3	5.784	-0.284	1	PF00080 (1);		AT1G08830.1	91	9e-87	85
		Gh_D13G1747	WGD/segmental	Superoxide dismutase [Cu-Zn]	D13	52235057	52236244	-	1188	459	459	7	152	15.195	-3	5.771	-0.159	1	PF00080 (1);		AT1G08830.1	100	4e-89	84
		Gh_A09G2473	Dispersed	Superoxide dismutase [Cu-Zn], chloroplastic	scaffold2314_A09	397	6013	-	5617	1404	1404	8	467	49.636	1	6.59	-0.339	3	PF00080 (1); PF13912 (2);		AT2G28190.1	43	1e-100	77
		Gh_D09G0858	WGD/segmental	Superoxide dismutase [Cu-Zn], chloroplastic	D09	33602696	33604208	-	1513	645	645	6	214	22.512	2.5	7.015	-0.107	1	PF00080 (1);		AT2G28190.1	87	8e-91	73
		Gh_A05G0722	WGD/segmental	Superoxide dismutase [Cu-Zn], chloroplastic	A05	7521668	7524293	-	2626	693	693	7	230	24.166	5	7.244	0.014	1	PF00080 (1);		AT2G28190.1	88	7e-91	69
		Gh_D05G0857	WGD/segmental	Superoxide dismutase [Cu-Zn], chloroplastic	D05	7202468	7204946	-	2479	567	567	7	188	19.685	1.5	6.738	-0.053	1	PF00080 (1);		AT2G28190.1	95	6e-82	72
		Gh_A13G0817	WGD/segmental	Superoxide dismutase [Cu-Zn]	A13	39169572	39170465	-	894	459	459	5	152	15.113	-0.5	6.409	-0.095	1	PF00080 (1);		AT1G08830.1	100	7e-90	84
		Gh_D13G1062	WGD/segmental	Superoxide dismutase [Cu-Zn]	D13	29544943	29545835	-	893	459	459	5	152	15.085	-0.5	6.409	-0.111	1	PF00080 (1);		AT1G08830.1	100	3e-89	84
		Gh_A07G0392	WGD/segmental	Superoxide dismutase [Fe] 2, chloroplastic	A07	4977840	4980739	+	2900	930	930	9	309	35.646	-15	4.57	-0.661	2	PF00081 (1); PF02777 (1);		AT5G51100.1	90	8e-143	70
		Gh_D07G0457	WGD/segmental	Superoxide dismutase [Fe] 2, chloroplastic	D07	4887895	4890769	+	2875	927	927	9	308	35.522	-15	4.577	-0.645	2	PF00081 (1); PF02777 (1);		AT5G51100.1	90	6e-143	70
		Gh_A13G0530	WGD/segmental	Superoxide dismutase [Fe] 3, chloroplastic	A13	12258203	12260923	+	2721	765	765	6	254	28.869	3.5	7.627	-0.217	2	PF00081 (1); PF02777 (1);		AT5G23310.1	99	2e-124	69
		Gh_D13G0600	WGD/segmental	Superoxide dismutase [Fe] 3, chloroplastic	D13	8345288	8348000	-	2713	765	765	6	254	28.834	4.5	8.084	-0.273	2	PF00081 (1); PF02777 (1);		AT5G23310.1	99	7e-122	68
		Gh_A05G2383	WGD/segmental	Superoxide dismutase [Mn], mitochondrial	A05	29443309	29446068	-	2760	693	693	6	230	25.704	4.5	7.978	-0.363	2	PF00081 (1); PF02777 (1);		AT3G10920.1	99	1e-138	81
		Gh_D05G2648	WGD/segmental	Superoxide dismutase [Mn], mitochondrial	D05	27530556	27533301	-	2746	693	693	6	230	25.679	4.5	7.977	-0.359	2	PF00081 (1); PF02777 (1);		AT3G10920.1	99	1e-138	81
		Gh_A10G1595	WGD/segmental	Superoxide dismutase [Mn], mitochondrial	A10	86118598	86120747	-	2150	696	696	6	231	25.956	7	8.847	-0.323	2	PF00081 (1); PF02777 (1);		AT3G10920.1	99	2e-134	79
		Gh_D10G1852	WGD/segmental	Superoxide dismutase [Mn], mitochondrial	D10	51772442	51774601	-	2160	696	696	6	231	26.078	7.5	8.848	-0.374	2	PF00081 (1); PF02777 (1);		AT3G10920.1	99	3e-133	78
Ascorbate Peroxidase (APX)	G. arboretum	Cotton_A_31285	Dispersed	L-ascorbate peroxidase 3, peroxisomal	Chr02	55987108	55994247	-	7140	870	870	10	290	32.106	-3	5.883	-0.369	1	PF00141 (1);		AT4G35000.1	100	3e-158	79
2 Asc + H2O2 → 2 MDA + 2H2O		Cotton_A_01547	WGD/segmental	Probable L-ascorbate peroxidase 3	Chr01	135072546	135075339	+	2794	891	891	9	296	33.243	6	8.219	-0.471	1	PF00141 (1);		AT4G35000.1	87	1e-134	73
		Cotton_A_00641	WGD/segmental	L-ascorbate peroxidase 3, peroxisomal	Chr05	8523970	8528123	-	4154	867	867	9	288	31.958	2.5	7.196	-0.337	1	PF00141 (1);		AT4G35000.1	100	3e-174	85
		Cotton_A_02871	Dispersed	L-ascorbate peroxidase 2, cytosolic	Chr09	74342572	74344030	-	1459	741	741	8	246	27.069	2.5	6.91	-0.394	1	PF00141 (1);		AT3G09640.1	100	7e-156	85
		Cotton_A_07027	WGD/segmental	L-ascorbate peroxidase 2, cytosolic	Chr10	88245801	88248624	-	2824	1699	753	9	250	27.634	-2.5	6.043	-0.425	1	PF00141 (1);		AT1G07890.3	100	8e-156	81
		Cotton_A_16087	WGD/segmental	L-ascorbate peroxidase S, chloroplastic/mitochondrial	Chr10	23568672	23572003	+	3332	1143	1143	10	380	41.073	10.5	9.182	-0.414	1	PF00141 (1);		AT4G08390.1	73	0	86
		Cotton_A_34995	Dispersed	Putative L-ascorbate peroxidase 6	Chr02	14607691	14610626	-	2936	1026	1026	10	341	37.131	7.5	8.892	-0.203	1	PF00141 (1);		AT4G32320.1	100	7e-133	57
		Cotton_A_05101	Tandem	L-ascorbate peroxidase 2, cytosolic	Chr03	89506130	89508076	+	1947	741	741	8	246	27.13	-3	5.855	-0.384	1	PF00141 (1);		AT1G07890.3	100	2e-151	80
		Cotton_A_05102	Tandem	L-ascorbate peroxidase 2, cytosolic	Chr03	89470276	89472198	+	1923	741	741	8	246	27.089	-3	5.852	-0.363	1	PF00141 (1);		AT3G09640.1	100	2e-149	83
		Cotton_A_05103	WGD/segmental	L-ascorbate peroxidase 2, cytosolic	Chr03	89466163	89468464	-	2302	777	777	9	258	28.488	-4	5.59	-0.336	1	PF00141 (1);		AT1G07890.3	95	3e-150	79
		Cotton_A_10528	WGD/segmental	L-ascorbate peroxidase 1, cytosolic	Chr08	103453973	103457007	-	3035	753	753	9	250	27.642	-5	5.371	-0.334	1	PF00141 (1);		AT1G07890.3	99	2e-144	77
	G. raimondii	Gorai.002G196800	WGD/segmental	L-ascorbate peroxidase 3, peroxisomal	Chr02	53231566	53237343	-	5778	1330	867	9	288	31.791	-3.5	5.843	-0.364	1	PF00141 (1);		AT4G35000.1	100	3e-166	82
		Gorai.003G008200	WGD/segmental	Probable L-ascorbate peroxidase 3	Chr03	497135	500305	+	3171	974	909	10	302	33.87	6	8.215	-0.489	1	PF00141 (1);		AT4G35000.1	87	2e-137	74
		Gorai.005G254100	WGD/segmental	L-ascorbate peroxidase 3, peroxisomal	Chr05	63167118	63172040	-	4923	1529	867	9	288	31.997	2.5	7.196	-0.334	1	PF00141 (1);		AT4G35000.1	100	4e-174	85
		Gorai.009G420500	Dispersed	L-ascorbate peroxidase 2, cytosolic	Chr09	65592264	65594126	-	1863	1050	756	9	251	27.801	-0.5	6.437	-0.429	1	PF00141 (1);		AT3G09640.1	100	1e-159	85
		Gorai.009G104500	WGD/segmental	L-ascorbate peroxidase 2, cytosolic	Chr09	7574361	7577019	+	2659	1442	753	10	250	27.562	-2.5	6.042	-0.4	1	PF00141 (1);		AT1G07890.3	100	1e-156	82
		Gorai.009G246900	WGD/segmental	L-ascorbate peroxidase S, chloroplastic/mitochondrial	Chr09	19899045	19903821	-	4777	1835	1158	12	385	41.762	10.5	9.182	-0.427	1	PF00141 (1);		AT4G08390.1	73	0	85
		Gorai.010G051400	WGD/segmental	L-ascorbate peroxidase T, chloroplastic	Chr10	5866603	5871364	-	4762	1780	1269	12	422	46.077	3.5	7.3	-0.415	1	PF00141 (1);		AT1G77490.1	88	0	78
		Gorai.010G115200	Dispersed	Putative L-ascorbate peroxidase 6	Chr10	22241712	22245501	-	3790	1240	1026	10	341	37.044	4.5	8.195	-0.224	1	PF00141 (1);		AT4G32320.1	100	6e-135	57
		Gorai.004G227100	WGD/segmental	L-ascorbate peroxidase 2, cytosolic	Chr04	56137110	56139983	-	2874	1433	753	9	250	27.529	-3.5	5.813	-0.366	1	PF00141 (1);		AT1G07890.3	100	8e-153	79
		Gorai.004G227200	Tandem	L-ascorbate peroxidase 2, cytosolic	Chr04	56156290	56159191	-	2902	1268	867	9	288	31.892	8.5	8.694	-0.398	1	PF00141 (1);		AT1G07890.3	85	1e-148	79
		Gorai.004G227300	Tandem	L-ascorbate peroxidase 2, cytosolic	Chr04	56159056	56162801	+	3746	1375	879	11	292	32.487	1.5	6.738	-0.379	1	PF00141 (1);		AT3G09640.1	85	7e-150	82
		Gorai.013G266100	WGD/segmental	L-ascorbate peroxidase 1, cytosolic	Chr13	57891151	57894711	+	3561	1146	762	10	253	27.782	-8.5	4.819	-0.3	1	PF00141 (1);		AT1G07890.3	98	1e-140	75
	G. hirsutum	Gh_A01G1388	WGD/segmental	L-ascorbate peroxidase 3, peroxisomal	A01	87059677	87066826	-	7150	867	867	9	288	31.855	-4	5.642	-0.315	1	PF00141 (1);		AT4G35000.1	99	2e-161	80
		Gh_D01G1632	WGD/segmental	L-ascorbate peroxidase 3, peroxisomal	D01	51431707	51437024	-	5318	867	867	9	288	31.777	-4	5.805	-0.381	1	PF00141 (1);		AT4G35000.1	100	1e-163	81
		Gh_A02G1648	WGD/segmental	Probable L-ascorbate peroxidase 3	A02	82884707	82887518	-	2812	909	909	9	302	33.972	9	9.113	-0.49	1	PF00141 (1);		AT4G35000.1	87	2e-140	75
		Gh_D03G0074	WGD/segmental	Probable L-ascorbate peroxidase 3	D03	531888	534705	+	2818	912	912	9	303	33.955	6.5	8.222	-0.502	1	PF00141 (1);		AT4G35000.1	87	9e-138	74
		Gh_A03G1812	WGD/segmental	L-ascorbate peroxidase 3, peroxisomal	A03	99201877	99205979	-	4103	867	867	9	288	31.942	2.5	7.196	-0.328	1	PF00141 (1);		AT4G35000.1	100	1e-174	85
		Gh_D02G2245	WGD/segmental	L-ascorbate peroxidase 3, peroxisomal	D02	66344682	66348942	-	4261	867	867	9	288	31.962	2.5	7.196	-0.33	1	PF00141 (1);		AT4G35000.1	100	1e-174	85
		Gh_A04G0652	WGD/segmental	L-ascorbate peroxidase 1, cytosolic	A04	44645540	44646987	-	1448	552	552	6	183	20.54	6.5	7.9	-0.474	1	PF00141 (1);		AT1G07890.3	98	2e-81	55
		Gh_D04G1116	WGD/segmental	L-ascorbate peroxidase 2, cytosolic	D04	36784560	36786018	-	1459	723	723	8	240	26.545	0	6.511	-0.45	1	PF00141 (1);		AT3G09640.1	100	6e-148	82
		Gh_A05G0863	WGD/segmental	L-ascorbate peroxidase 1, cytosolic	A05	8607073	8608956	+	1884	753	753	9	250	27.584	-1	6.348	-0.398	1	PF00141 (1);		AT1G07890.3	100	1e-155	81
		Gh_D05G3875	WGD/segmental	L-ascorbate peroxidase 2, cytosolic	scaffold4074_D05	76982	78848	+	1867	753	753	9	250	27.562	-2.5	6.042	-0.4	1	PF00141 (1);		AT1G07890.3	100	1e-156	82
		Gh_A05G3726	WGD/segmental	L-ascorbate peroxidase S, chloroplastic/mitochondrial	scaffold1211_A05	122462	125928	-	3467	1182	1182	11	393	42.725	13.5	9.349	-0.411	1	PF00141 (1);		AT4G08390.1	71	0	85
		Gh_D05G2244	WGD/segmental	L-ascorbate peroxidase T, chloroplastic	D05	21543390	21547747	-	4358	1218	1218	11	405	43.817	10	9.153	-0.429	1	PF00141 (1);		AT1G77490.1	82	0	72
		Gh_A06G0383	WGD/segmental	L-ascorbate peroxidase T, chloroplastic	A06	6376778	6380906	-	4129	1167	1167	11	388	42.247	4.5	7.683	-0.374	1	PF00141 (1);		AT1G77490.1	83	0	79
		Gh_D06G0413	WGD/segmental	L-ascorbate peroxidase T, chloroplastic	D06	5889650	5894261	-	4612	1353	1353	13	450	49.683	3.5	7.299	-0.404	1	PF00141 (1);		AT1G77490.1	80	0	79
		Gh_A06G2046	Dispersed	Putative L-ascorbate peroxidase 6	scaffold1353_A06	45925	48581	+	2657	960	960	9	319	34.419	7	8.879	-0.161	1	PF00141 (1);		AT4G32320.1	95	2e-116	57
		Gh_D06G1049	Dispersed	Putative L-ascorbate peroxidase 6	D06	22550424	22553640	-	3217	1008	1008	10	335	36.095	13	9.946	-0.247	1	PF00141 (1);		AT4G32320.1	90	4e-119	58
		Gh_A08G1744	WGD/segmental	L-ascorbate peroxidase 2, cytosolic	A08	97409160	97411219	-	2060	753	753	9	250	27.534	-4	5.596	-0.366	1	PF00141 (1);		AT1G07890.3	100	4e-154	80
		Gh_D08G2093	WGD/segmental	L-ascorbate peroxidase 2, cytosolic	D08	59783046	59784995	-	1950	741	741	8	246	27.125	-2.5	6.037	-0.384	1	PF00141 (1);		AT1G07890.3	100	4e-150	79
		Gh_A08G1745	Tandem	L-ascorbate peroxidase 2, cytosolic	A08	97440700	97442620	-	1921	726	726	8	241	26.718	5.5	7.739	-0.275	1	PF00141 (1);		AT1G07890.3	100	4e-121	69
		Gh_D08G2094	Tandem	L-ascorbate peroxidase, cytosolic	D08	59804611	59806683	-	2073	738	738	9	245	27.024	-2.5	5.905	-0.354	1	PF00141 (1);		AT1G07890.3	100	5e-147	77
		Gh_A08G1746	Tandem	L-ascorbate peroxidase 2, cytosolic	A08	97442829	97446411	+	3583	867	867	10	288	32.07	2.5	6.906	-0.393	1	PF00141 (1);		AT1G07890.3	85	2e-149	79
		Gh_D08G2095	Tandem	L-ascorbate peroxidase 2, cytosolic	D08	59806893	59810058	+	3166	879	879	11	292	32.56	3	6.954	-0.409	1	PF00141 (1);		AT3G09640.1	85	3e-151	82
		Gh_A13G2003	WGD/segmental	L-ascorbate peroxidase 1, cytosolic	A13	79484281	79487307	+	3027	762	762	9	253	28.002	-6	5.191	-0.32	1	PF00141 (1);		AT1G07890.3	98	1e-144	77
		Gh_D13G2402	WGD/segmental	L-ascorbate peroxidase 1, cytosolic	D13	60076810	60079762	+	2953	750	750	8	249	27.306	-5.5	5.168	-0.271	1	PF00141 (1);		AT1G07890.3	99	2e-139	76
Monodehydroascorbate Reductase (MDAR)	G. arboretum	Cotton_A_00532	WGD/segmental	Monodehydroascorbate reductase	Chr02	67939441	67942835	-	3395	1855	1305	10	434	47.219	-1.5	6.114	-0.084	1	PF07992 (1);		AT3G52880.2	100	0	75
MDA + NAD(P)H + H+ → Asc + NAD(P)-		Cotton_A_13437	WGD/segmental	Monodehydroascorbate reductase	Chr11	75995132	75999575	-	4444	2168	1305	10	434	46.94	1	6.945	-0.065	1	PF07992 (1);		AT3G52880.2	100	0	75
		Cotton_A_16171	Dispersed	Monodehydroascorbate reductase 4, peroxisomal	Chr09	16648136	16652575	+	4440	1683	1443	7	480	52.078	8	8.495	0	1	PF07992 (1);		AT3G27820.1	100	0	79
		Cotton_A_32716	Dispersed	Monodehydroascorbate reductase 5, mitochondrial	Chr10	31430417	31434484	+	4068	1452	1452	16	483	52.546	4	7.556	-0.111	1	PF07992 (1);		AT1G63940.2	99	0	79
		Cotton_A_17946	Dispersed	Monodehydroascorbate reductase	Chr13	116062916	116067250	-	4335	2307	2307	4	769	85.756	21.5	9.446	-0.253	1	PF07992 (1);		AT3G52880.2	56	0	67
		Cotton_A_10193	Dispersed	Monodehydroascorbate reductase 4, peroxisomal	Chr09	63636335	63640009	-	3675	1440	1440	7	479	52.292	0.5	6.587	-0.068	1	PF07992 (1);		AT3G27820.1	100	0	72
	G. raimondii	Gorai.002G241300	WGD/segmental	Monodehydroascorbate reductase	Chr02	60463573	60466896	-	3324	1779	1305	10	434	47.182	0	6.552	-0.088	1	PF07992 (1);		AT3G52880.2	100	0	75
		Gorai.006G156800	WGD/segmental	Monodehydroascorbate reductase	Chr06	41548612	41552801	-	4190	1932	1305	10	434	46.858	-1.5	5.942	-0.053	1	PF07992 (1);		AT3G52880.2	100	0	75
		Gorai.011G095600	WGD/segmental	Monodehydroascorbate reductase 4, peroxisomal	Chr11	10392853	10397405	+	4553	1787	1443	7	480	52.141	7	8.307	0.014	1	PF07992 (1);		AT3G27820.1	100	0	79
		Gorai.008G250000	Dispersed	Monodehydroascorbate reductase 5, mitochondrial	Chr08	53393691	53398523	+	4833	2053	1482	17	493	53.682	8	8.596	-0.116	1	PF07992 (1);		AT1G63940.2	99	0	79
		Gorai.013G166500	Dispersed	Monodehydroascorbate reductase	Chr13	44950293	44954746	+	4454	2190	2190	3	729	81.112	22	9.569	-0.271	1	PF07992 (1);		AT5G03630.1	59	0	72
		Gorai.006G030700	WGD/segmental	Monodehydroascorbate reductase 4, peroxisomal	Chr06	7950564	7954673	-	4110	1865	1440	7	479	52.335	0	6.517	-0.029	1	PF07992 (1);		AT3G27820.1	100	0	71
	G. hirsutum	Gh_A01G1777	WGD/segmental	Monodehydroascorbate reductase	A01	97295385	97298227	-	2843	1305	1305	10	434	47.132	0.5	6.695	-0.077	1	PF07992 (1);		AT3G52880.2	100	0	74
		Gh_D01G2019	WGD/segmental	Monodehydroascorbate reductase	D01	59074761	59077608	-	2848	1305	1305	10	434	47.211	0	6.552	-0.071	1	PF07992 (1);		AT3G52880.2	100	0	75
		Gh_A09G1288	WGD/segmental	Monodehydroascorbate reductase	A09	65299391	65302973	+	3583	1305	1305	10	434	46.937	1	6.945	-0.065	1	PF07992 (1);		AT3G52880.2	100	0	76
		Gh_D09G1329	WGD/segmental	Monodehydroascorbate reductase	D09	40473607	40477174	-	3568	1305	1305	10	434	46.868	-1.5	5.942	-0.055	1	PF07992 (1);		AT3G52880.2	100	0	75
		Gh_A10G0928	WGD/segmental	Monodehydroascorbate reductase 4, peroxisomal	A10	20587224	20591384	+	4161	1443	1443	7	480	52.109	8	8.495	-0.004	1	PF07992 (1);		AT3G27820.1	100	0	79
		Gh_D10G0844	WGD/segmental	Monodehydroascorbate reductase 4, peroxisomal	D10	10503074	10507280	+	4207	1443	1443	7	480	52.127	7	8.307	0.014	1	PF07992 (1);		AT3G27820.1	100	0	79
		Gh_A12G2674	WGD/segmental	Monodehydroascorbate reductase 5, mitochondrial	scaffold3404_A12	191488	195554	-	4067	1452	1452	16	483	52.55	3	7.218	-0.114	1	PF07992 (1);		AT1G63940.2	99	0	79
		Gh_D12G2745	WGD/segmental	Monodehydroascorbate reductase 5, mitochondrial	scaffold4588_D12	8190	12301	+	4112	1461	1461	16	486	52.813	6	8.175	-0.1	1	PF07992 (1);		AT1G63940.2	99	0	80
		Gh_A13G1223	Dispersed	Monodehydroascorbate reductase	A13	65545613	65547289	+	1677	1677	1677	1	558	62.206	14.5	9.491	-0.185	1	PF07992 (1);		AT5G03630.1	77	0	72
		Gh_D13G1521	WGD/segmental	Monodehydroascorbate reductase	D13	47052236	47056563	+	4328	2190	2190	3	729	81.116	24	9.698	-0.269	1	PF07992 (1);		AT5G03630.1	59	0	71
		Gh_D09G0264	WGD/segmental	Monodehydroascorbate reductase 4, peroxisomal	D09	8298828	8302523	-	3696	1440	1440	7	479	52.322	-1	6.359	-0.011	1	PF07992 (1);		AT3G27820.1	100	0	72
		Gh_Sca009869G01	Dispersed	Monodehydroascorbate reductase 4, peroxisomal	scaffold9869	2729	5441	-	2713	1320	1320	6	439	48.062	0	6.515	-0.102	1	PF07992 (1);		AT3G27820.1	100	0	71
Dehydroascorbate Reductase (DHAR)	G. arboretum	Cotton_A_00425	WGD/segmental	Glutathione S-transferase L3	Chr02	69229452	69232705	-	3254	717	717	8	238	27.456	-3.5	5.051	-0.45	2	PF13417 (1); PF16865 (1);		AT5G02790.1	97	6e-109	67
DHA + 2 GSH → Asc + GSSG		Cotton_A_15919	Dispersed	Glutathione S-transferase DHAR2	Chr12	9370070	9371802	+	1733	639	639	6	212	23.5	3.5	8.072	-0.071	2	PF13417 (1); PF13410 (1);		AT1G75270.1	100	1e-124	79
		Cotton_A_30812	Dispersed	Glutathione S-transferase DHAR3, chloroplastic	Chr01	130018051	130020359	-	2309	789	789	6	262	29.325	3.5	8.059	-0.243	1	PF13417 (1);		AT5G16710.1	85	1e-133	79
		Cotton_A_02453	Dispersed	Glutathione S-transferase L3	Chr11	21297228	21299341	-	2114	774	774	10	257	29.239	-10	4.56	-0.297	2	PF13417 (1); PF13410 (1);		AT5G02790.1	89	4e-98	62
		Cotton_A_15148	Dispersed	Glutathione S-transferase DHAR2	Chr07	100492981	100495618	-	2638	1190	639	6	212	23.44	1.5	6.881	-0.076	2	PF13417 (1); PF13410 (1);		AT1G75270.1	100	2e-120	77
	G. raimondii	Gorai.002G252300	WGD/segmental	Glutathione S-transferase L3	Chr02	61557665	61560819	-	3155	738	738	9	245	28.256	-3.5	5.061	-0.432	2	PF13417 (1); PF16865 (1);		AT5G02790.1	94	2e-108	67
		Gorai.012G068600	Dispersed	Glutathione S-transferase DHAR2	Chr12	10022598	10024825	-	2228	1160	639	6	212	23.472	2.5	7.554	-0.07	2	PF13417 (1); PF13410 (1);		AT1G75270.1	100	2e-124	79
		Gorai.001G089300	Dispersed	Glutathione S-transferase DHAR3, chloroplastic	Chr01	9656330	9658909	-	2580	1089	789	6	262	29.241	6	9.014	-0.203	1	PF13417 (1);		AT5G16710.1	85	6e-132	79
		Gorai.006G177600	WGD/segmental	Glutathione S-transferase L3	Chr06	43499453	43502034	+	2582	1271	714	10	237	26.929	-5.5	4.887	-0.319	2	PF13417 (1); PF13410 (1);		AT5G02790.1	96	1e-99	62
		Gorai.011G246200	Dispersed	Glutathione S-transferase DHAR2	Chr11	57230753	57234321	+	3569	1325	639	6	212	23.541	0.5	6.63	-0.129	2	PF13417 (1); PF13410 (1);		AT1G75270.1	100	6e-118	76
	G. hirsutum	Gh_A01G2148	WGD/segmental	Glutathione S-transferase L3	scaffold188_A01	46439	52525	-	6087	717	717	10	238	27.408	-5.5	4.815	-0.426	2	PF13417 (1); PF16865 (1);		AT5G02790.1	97	2e-108	66
		Gh_D01G2119	WGD/segmental	Glutathione S-transferase L3	D01	60245797	60248953	-	3157	738	738	9	245	28.256	-3.5	5.061	-0.464	2	PF13417 (1); PF16865 (1);		AT5G02790.1	94	2e-108	67
		Gh_A05G3064	WGD/segmental	Glutathione S-transferase DHAR2	A05	78587323	78589054	+	1732	639	639	6	212	23.5	3.5	8.072	-0.071	2	PF13417 (1); PF13410 (1);		AT1G75270.1	100	1e-124	79
		Gh_D04G0580	WGD/segmental	Glutathione S-transferase DHAR2	D04	10263014	10264717	-	1704	639	639	6	212	23.472	2.5	7.554	-0.07	2	PF13417 (1); PF13410 (1);		AT1G75270.1	100	2e-124	79
		Gh_A07G0716	WGD/segmental	Glutathione S-transferase DHAR3, chloroplastic	A07	10937335	10939615	-	2281	789	789	6	262	29.325	3.5	8.059	-0.241	1	PF13417 (1);		AT5G16710.1	85	1e-132	79
		Gh_D07G0778	WGD/segmental	Glutathione S-transferase DHAR3, chloroplastic	D07	9659577	9661876	-	2300	789	789	6	262	29.284	6	9.034	-0.252	1	PF13417 (1);		AT5G16710.1	85	1e-132	79
		Gh_A09G1501	WGD/segmental	Glutathione S-transferase L3	A09	68166962	68169058	+	2097	714	714	10	237	26.947	-5	4.89	-0.339	2	PF13417 (1); PF13410 (1);		AT5G02790.1	96	7e-98	62
		Gh_D09G1511	WGD/segmental	Glutathione S-transferase L3	D09	42599608	42601638	+	2031	714	714	10	237	26.917	-5.5	4.887	-0.338	2	PF13417 (1); PF13410 (1);		AT5G02790.1	96	9e-99	62
		Gh_A10G1891	WGD/segmental	Glutathione S-transferase DHAR2	A10	95321336	95323420	+	2085	639	639	6	212	23.507	4	7.665	-0.102	2	PF13417 (1); PF13410 (1);		AT1G75270.1	100	3e-118	76
		Gh_D10G2161	WGD/segmental	Glutathione S-transferase DHAR2	D10	58579041	58581912	+	2872	639	639	6	212	23.517	0	6.516	-0.092	2	PF13417 (1); PF13410 (1);		AT1G75270.1	100	3e-116	75
Glutathione Reductase (GR)	G. arboretum	Cotton_A_31743	Dispersed	Glutathione reductase, chloroplastic (Fragment)	Chr11	55151228	55160763	-	9536	1494	1494	16	498	53.957	0	6.518	-0.115	2	PF07992 (1); PF02852 (1);		AT3G24170.1	100	0	80
GSSG + NAD(P)H → 2 GSH + NAD(P)-		Cotton_A_31437	Dispersed	Glutathione reductase, cytosolic	Chr13	29171893	29179494	-	7602	1491	1491	16	496	53.54	2.5	7.142	-0.111	2	PF07992 (1); PF02852 (1);		AT3G24170.1	100	0	80
		Cotton_A_26565	WGD/segmental	Glutathione reductase, chloroplastic (Fragment)	Chr04	23395106	23399580	+	4475	1701	1701	11	566	61.725	10	7.944	-0.174	2	PF07992 (1); PF02852 (1);		AT3G54660.1	94	0	81
	G. raimondii	Gorai.005G131500	WGD/segmental	Glutathione reductase, chloroplastic (Fragment)	Chr05	32423600	32436314	-	12715	1557	1494	17	497	53.733	-2.5	6.086	-0.104	2	PF07992 (1); PF02852 (1);		AT3G24170.1	100	0	81
		Gorai.011G160200	WGD/segmental	Glutathione reductase, cytosolic	Chr11	29283264	29291302	-	8039	1881	1491	16	496	53.534	1	6.785	-0.101	2	PF07992 (1); PF02852 (1);		AT3G24170.1	100	0	80
		Gorai.007G142200	Dispersed	Glutathione reductase, chloroplastic (Fragment)	Chr07	11845169	11851676	-	6508	1898	1734	9	577	63.072	9.5	7.648	-0.119	2	PF07992 (1); PF02852 (1);		AT3G54660.1	92	0	78
	G. hirsutum	Gh_A03G0807	WGD/segmental	Glutathione reductase, chloroplastic (Fragment)	A03	41539513	41549250	+	9738	1500	1500	16	499	54.058	-2	6.206	-0.125	2	PF07992 (1); PF02852 (1);		AT3G24170.1	100	0	80
		Gh_D02G1229	WGD/segmental	Glutathione reductase, chloroplastic (Fragment)	D02	39009159	39018875	+	9717	1491	1491	16	496	53.734	-3.5	5.9	-0.11	2	PF07992 (1); PF02852 (1);		AT3G24170.1	100	0	81
		Gh_A10G1090	WGD/segmental	Glutathione reductase, cytosolic	A10	50620362	50627957	+	7596	1491	1491	16	496	53.54	2.5	7.142	-0.111	2	PF07992 (1); PF02852 (1);		AT3G24170.1	100	0	80
		Gh_D10G1419	WGD/segmental	Glutathione reductase, cytosolic	D10	29986766	29993997	-	7232	1491	1491	16	496	53.515	0.5	6.634	-0.098	2	PF07992 (1); PF02852 (1);		AT3G24170.1	100	0	80
		Gh_A11G1167	WGD/segmental	Glutathione reductase, chloroplastic (Fragment)	A11	14250545	14254428	-	3884	1737	1737	9	578	63.307	10.5	7.833	-0.128	2	PF07992 (1); PF02852 (1);		AT3G54660.1	92	0	79
		Gh_D11G1323	WGD/segmental	Glutathione reductase, chloroplastic (Fragment)	D11	12761771	12765887	-	4117	1734	1734	9	577	63.072	8.5	7.466	-0.13	2	PF07992 (1); PF02852 (1);		AT3G54660.1	92	0	79
Catalase (Cat)	G. arboretum	Cotton_A_12650	Dispersed	Catalase isozyme 1	Chr07	87235108	87238301	+	3194	1479	1479	8	492	56.877	8.5	7.173	-0.536	2	PF00199 (1); PF06628 (1);		AT4G35090.1	100	0	91
2H2O2 → 2H2O + O2		Cotton_A_28649	Dispersed	Catalase isozyme 2	Chr01	137352494	137355009	+	2516	1470	1470	7	489	56.528	10.5	7.454	-0.546	2	PF00199 (1); PF06628 (1);		AT4G35090.1	99	0	91
		Cotton_A_04598	Dispersed	Catalase isozyme 1	Chr10	19613731	19616459	+	2729	1458	1458	7	485	55.186	17	8.312	-0.472	2	PF00199 (2);		AT4G35090.1	81	0	85
		Cotton_A_27460	Dispersed	Catalase isozyme 2	Chr02	56739849	56742187	-	2339	1296	1296	9	431	49.446	5	6.96	-0.535	3	PF00199 (2); PF06628 (1);		AT4G35090.1	99	0	75
	G. raimondii	Gorai.002G115900	WGD/segmental	Catalase isozyme 1	Chr02	16463501	16467331	-	3831	2027	1479	8	492	56.817	8.5	7.173	-0.538	2	PF00199 (1); PF06628 (1);		AT4G35090.1	100	0	91
		Gorai.003G002800	WGD/segmental	Catalase isozyme 2	Chr03	166803	170155	-	3353	1831	1479	8	492	56.927	10.5	7.453	-0.56	2	PF00199 (1); PF06628 (1);		AT4G35090.1	100	0	91
		Gorai.009G187600	WGD/segmental	Catalase isozyme 1	Chr09	14404847	14408778	-	3932	2026	1479	8	492	56.961	10	7.413	-0.591	2	PF00199 (1); PF06628 (1);		AT4G35090.1	100	0	91
		Gorai.001G198700	WGD/segmental	Catalase isozyme 2	Chr01	35540038	35542381	+	2344	1311	1311	8	436	50.452	10.5	7.785	-0.436	2	PF00199 (2);		AT4G35090.1	100	0	76
	G. hirsutum	Gh_A01G0845	WGD/segmental	Catalase isozyme 1	A01	19440294	19443475	-	3182	1479	1479	8	492	56.829	8.5	7.173	-0.533	2	PF00199 (1); PF06628 (1);		AT4G35090.1	100	0	91
		Gh_D01G0873	WGD/segmental	Catalase isozyme 1	D01	14348913	14352092	-	3180	1479	1479	8	492	56.817	8.5	7.173	-0.538	2	PF00199 (1); PF06628 (1);		AT4G35090.1	100	0	91
		Gh_A02G1698	WGD/segmental	Catalase isozyme 2	A02	83178810	83181326	+	2517	1470	1470	7	489	56.528	10.5	7.454	-0.546	2	PF00199 (1); PF06628 (1);		AT4G35090.1	99	0	91
		Gh_D03G0021	WGD/segmental	Catalase isozyme 2	D03	171438	173963	-	2526	1485	1485	7	494	57.285	9.5	7.31	-0.543	2	PF00199 (1); PF06628 (1);		AT4G35090.1	99	0	91
		Gh_A05G1539	WGD/segmental	Catalase isozyme 1	A05	15642154	15645557	-	3404	1419	1419	9	472	54.706	7.5	7.068	-0.561	3	PF00199 (2); PF06628 (1);		AT4G35090.1	100	0	86
		Gh_D05G1710	WGD/segmental	Catalase isozyme 1	D05	15409889	15413267	-	3379	1479	1479	8	492	56.957	10	7.413	-0.587	2	PF00199 (1); PF06628 (1);		AT4G35090.1	100	0	91
		Gh_Sca049259G01	Dispersed	Catalase isozyme 1	scaffold49259	61	783	-	723	723	723	1	241	27.928	-2.5	6.254	-0.556	1	PF00199 (1);		AT4G35090.1	100	2e-169	92
		Gh_A07G1556	Dispersed	Catalase isozyme 2	A07	57094046	57096383	+	2338	1230	1230	9	409	46.962	3.5	6.869	-0.498	3	PF00199 (2); PF06628 (1);		AT4G35090.1	99	0	71
		Gh_D07G1724	WGD/segmental	Catalase isozyme 2	D07	38025779	38028131	+	2353	1314	1314	8	437	50.484	11	7.837	-0.56	2	PF00199 (2);		AT4G35090.1	100	0	78
Glutathione Peroxidase (GPX)	G. arboretum	Cotton_A_19216	Dispersed	Phospholipid hydroperoxide glutathione peroxidase, chloroplastic	Chr01	49198683	49199754	-	1072	720	720	5	239	26.402	8.5	9.621	-0.183	1	PF00255 (1);		AT2G25080.1	87	3e-108	73
H2O2 + 2 GSH → 2H2O + GSSG		Cotton_A_30627	Dispersed	Probable glutathione peroxidase 4	Chr13	45314191	45316811	+	2621	1059	516	6	171	19.171	7.5	9.503	-0.469	1	PF00255 (1);		AT2G48150.1	98	5e-91	73
		Cotton_A_13937	Dispersed	Probable glutathione peroxidase 2	Chr12	98146213	98148242	+	2030	540	540	6	179	20.374	-0.5	6.269	-0.467	1	PF00255 (1);		AT2G31570.1	84	3e-82	75
		Cotton_A_19545	Dispersed	Probable glutathione peroxidase 4	Chr03	45554742	45556238	-	1497	516	516	6	171	19.216	3.5	8.426	-0.463	1	PF00255 (1);		AT2G48150.1	98	6e-88	71
		Cotton_A_25980	Proximal	Probable phospholipid hydroperoxide glutathione peroxidase	Chr03	24927763	24929146	-	1384	570	570	5	189	21.095	-3	5.051	-0.393	1	PF00255 (1);		AT4G11600.1	84	5e-97	84
		Cotton_A_22305	Dispersed	Probable phospholipid hydroperoxide glutathione peroxidase	Chr10	112980653	112981433	-	781	456	456	4	151	16.949	1.5	8.012	-0.337	1	PF00255 (1);		AT2G43350.1	99	6e-78	71
		Cotton_A_14470	Proximal	Probable phospholipid hydroperoxide glutathione peroxidase 6, mitochondrial	Chr07	47843526	47845403	+	1878	1126	702	6	233	25.502	6	9.026	-0.171	1	PF00255 (1);		AT4G11600.1	75	3e-103	82
		Cotton_A_14472	Proximal	Probable glutathione peroxidase 8	Chr07	47853421	47854468	+	1048	468	468	4	155	17.732	-4	4.776	-0.323	1	PF00255 (1);		AT1G63460.1	92	2e-84	80
	G. raimondii	Gorai.001G038600	Dispersed	Phospholipid hydroperoxide glutathione peroxidase, chloroplastic	Chr01	3614324	3616574	+	2251	1259	729	6	242	26.69	8.5	9.743	-0.243	1	PF00255 (1);		AT2G25080.1	90	6e-115	75
		Gorai.004G083200	WGD/segmental	Probable glutathione peroxidase 4	Chr04	10238545	10241381	-	2837	1088	528	5	175	19.968	9	9.596	-0.402	1	PF00255 (1);		AT2G48150.1	91	4e-86	73
		Gorai.004G087300	Dispersed	Probable glutathione peroxidase 3, mitochondrial	Chr04	11621776	11631534	-	9759	1116	627	8	208	23.662	-2	5.358	-0.276	1	PF00255 (1);		AT2G43350.1	94	2e-90	67
		Gorai.004G215500	WGD/segmental	Probable glutathione peroxidase 4	Chr04	54844392	54846972	+	2581	1488	687	7	228	26.026	13	9.777	-0.426	1	PF00255 (1);		AT2G48150.1	70	4e-83	70
		Gorai.004G211400	WGD/segmental	Probable phospholipid hydroperoxide glutathione peroxidase	Chr04	54418717	54420760	+	2044	1191	570	5	189	21.188	-2	5.332	-0.404	1	PF00255 (1);		AT4G11600.1	84	8e-98	84
		Gorai.006G186100	Dispersed	Probable glutathione peroxidase 2	Chr06	44317902	44326238	-	8337	1827	507	6	168	18.786	1	7.338	-0.326	1	PF00255 (1);		AT2G31570.1	98	4e-88	73
		Gorai.008G246400	WGD/segmental	Probable phospholipid hydroperoxide glutathione peroxidase 6, mitochondrial	Chr08	53075193	53077259	+	2067	1204	753	6	250	27.464	2	7.496	-0.127	1	PF00255 (1);		AT4G11600.1	67	2e-97	81
		Gorai.008G246600	Proximal	Probable glutathione peroxidase 8	Chr08	53089328	53092858	+	3531	1454	507	7	168	19.13	-8.5	4.326	-0.341	1	PF00255 (1);		AT1G63460.1	95	2e-90	76
	G. hirsutum	Gh_A07G0269	WGD/segmental	Phospholipid hydroperoxide glutathione peroxidase, chloroplastic	A07	3356541	3358218	+	1678	729	729	6	242	26.739	8.5	9.734	-0.228	1	PF00255 (1);		AT2G25080.1	90	4e-115	75
		Gh_D07G0326	WGD/segmental	Phospholipid hydroperoxide glutathione peroxidase, chloroplastic	D07	3471785	3472876	+	1092	741	741	5	246	27.027	7.5	9.47	-0.158	1	PF00255 (1);		AT2G25080.1	85	1e-108	74
		Gh_A08G0633	WGD/segmental	Probable glutathione peroxidase 4	A08	12081172	12083093	-	1922	528	528	5	175	19.911	8	9.327	-0.347	1	PF00255 (1);		AT2G48150.1	91	3e-86	73
		Gh_D08G0734	WGD/segmental	Probable glutathione peroxidase 4	D08	10626887	10628967	-	2081	471	471	7	156	17.372	5.5	9.099	-0.561	1	PF00255 (1);		AT2G48150.1	97	1e-75	65
		Gh_A08G0673	WGD/segmental	Probable glutathione peroxidase 3, mitochondrial	A08	14886899	14888918	-	2020	621	621	5	206	23.649	-1	5.838	-0.181	1	PF00255 (1);		AT2G43350.1	93	2e-83	64
		Gh_D08G0775	WGD/segmental	Probable glutathione peroxidase 3, mitochondrial	D08	12103742	12105782	-	2041	621	621	5	206	23.548	0	6.526	-0.123	1	PF00255 (1);		AT2G43350.1	93	3e-84	66
		Gh_A08G1661	WGD/segmental	Probable glutathione peroxidase 4	A08	96203210	96204706	+	1497	516	516	6	171	19.216	3.5	8.426	-0.463	1	PF00255 (1);		AT2G48150.1	98	6e-88	71
		Gh_D08G1994	WGD/segmental	Probable glutathione peroxidase 4	D08	58391385	58392784	+	1400	516	516	6	171	19.188	5.5	9.014	-0.462	1	PF00255 (1);		AT2G48150.1	98	2e-86	69
		Gh_A08G2385	WGD/segmental	Probable phospholipid hydroperoxide glutathione peroxidase	scaffold1940_A08	73888	75271	-	1384	570	570	5	189	21.095	-3	5.051	-0.393	1	PF00255 (1);		AT4G11600.1	84	5e-97	84
		Gh_D08G1956	WGD/segmental	Probable phospholipid hydroperoxide glutathione peroxidase	D08	57874640	57876108	+	1469	501	501	6	166	18.501	1	7.338	-0.377	1	PF00255 (1);		AT4G11600.1	100	5e-102	83
		Gh_A09G2408	WGD/segmental	Probable glutathione peroxidase 2	scaffold2300_A09	54560	61870	-	7311	492	492	5	163	18.306	2	8.025	-0.249	1	PF00255 (1);		AT2G31570.1	95	7e-85	75
		Gh_D09G1595	WGD/segmental	Probable phospholipid hydroperoxide glutathione peroxidase	D09	43533671	43543691	-	10021	432	432	5	143	15.81	0.5	7.183	-0.137	2	PF00255 (2);		AT4G11600.1	97	5e-67	64
		Gh_A12G2084	WGD/segmental	Probable phospholipid hydroperoxide glutathione peroxidase 6, mitochondrial	A12	83692525	83694015	+	1491	753	753	6	250	27.523	3	8.047	-0.139	1	PF00255 (1);		AT4G11600.1	67	1e-97	81
		Gh_D12G2260	WGD/segmental	Probable phospholipid hydroperoxide glutathione peroxidase 6, mitochondrial	D12	55725155	55726643	+	1489	753	753	6	250	27.477	1	6.934	-0.109	1	PF00255 (1);		AT4G11600.1	67	5e-98	82
		Gh_A12G2086	Proximal	Probable glutathione peroxidase 8	A12	83701444	83703305	+	1862	507	507	6	168	19.293	-3.5	4.842	-0.399	1	PF00255 (1);		AT1G63460.1	98	5e-92	74
		Gh_D12G2262	Proximal	Probable glutathione peroxidase 8	D12	55741739	55743610	+	1872	507	507	6	168	19.13	-8.5	4.326	-0.341	1	PF00255 (1);		AT1G63460.1	95	2e-90	76
Ferritin	G. arboretum	Cotton_A_03437	WGD/segmental	Ferritin-3, chloroplastic	Chr12	26664339	26666576	+	2238	687	687	8	229	25.967	1.5	6.747	-0.252	1	PF00210 (1);		AT5G01600.1	86	1e-100	69
Fe + P → P-Fe		Cotton_A_31482	Dispersed	Ferritin-2, chloroplastic	Chr10	77032456	77035123	+	2668	1456	783	8	260	29.241	-2	6.105	-0.275	1	PF00210 (1);		AT3G11050.1	98	2e-125	71
		Cotton_A_22323	WGD/segmental	Ferritin-3, chloroplastic	Chr10	112818725	112820897	-	2173	780	780	8	259	29.062	-3.5	5.954	-0.3	1	PF00210 (1);		AT5G01600.1	79	1e-120	79
		Cotton_A_10151	Dispersed	Ferritin-3, chloroplastic	Chr02	66870980	66873213	+	2234	753	753	8	250	28.086	-3	5.874	-0.273	1	PF00210 (1);		AT2G40300.1	82	3e-123	81
		Cotton_A_26229	Dispersed	Ferritin-3, chloroplastic	Chr07	31707285	31708893	+	1609	792	792	8	263	29.274	4.5	7.435	-0.111	1	PF00210 (1);		AT3G11050.1	98	9e-104	61
	G. raimondii	Gorai.012G118700	WGD/segmental	Ferritin-1, chloroplastic	Chr12	27241488	27243681	-	2194	630	630	7	210	24.13	-6	5.143	-0.362	1	PF00210 (1);		AT5G01600.1	68	6e-69	68
		Gorai.009G322800	Dispersed	Ferritin-3, chloroplastic	Chr09	31654652	31657311	-	2660	1441	783	8	260	29.308	-2.5	6.047	-0.23	1	PF00210 (1);		AT3G11050.1	98	9e-123	70
		Gorai.006G184700	WGD/segmental	Ferritin-3, chloroplastic	Chr06	44196706	44199336	-	2631	1273	780	8	259	29.04	-3	5.997	-0.327	1	PF00210 (1);		AT5G01600.1	79	1e-119	78
		Gorai.011G290900	WGD/segmental	Ferritin-2, chloroplastic	Chr11	62220767	62224061	+	3295	1861	786	7	261	29.436	2	7.115	-0.198	1	PF00210 (1);		AT3G11050.1	90	1e-116	70
		Gorai.012G079200	WGD/segmental	Ferritin-3, chloroplastic	Chr12	12845626	12846750	-	1125	541	303	5	100	11.317	1.5	6.803	-0.044	1	PF00210 (1);		AT3G11050.1	94	5e-41	66
		Gorai.012G079300	WGD/segmental	Ferritin-2, chloroplastic	Chr12	12846769	12847888	-	1120	616	510	3	169	18.701	-0.5	6.252	0.15	1	PF00210 (1);		AT2G40300.1	75	8e-48	63
	G. hirsutum	Gh_A04G1408	Dispersed	Ferritin-1, chloroplastic	scaffold1006_A04	33259	35520	-	2262	753	753	7	250	28.279	4.5	7.381	-0.142	1	PF00210 (1);		AT5G01600.1	82	1e-92	66
		Gh_D04G1310	WGD/segmental	Ferritin-3, chloroplastic	D04	42714580	42716998	-	2419	543	543	6	180	20.066	-4	5.535	-0.121	1	PF00210 (1);		AT5G01600.1	76	8e-58	64
		Gh_A05G2629	WGD/segmental	Ferritin-3, chloroplastic	A05	40123645	40125262	-	1618	501	501	7	166	19.033	-3	5.629	-0.302	1	PF00210 (1);		AT2G40300.1	92	3e-89	83
		Gh_D05G2919	WGD/segmental	Ferritin-3, chloroplastic	D05	34296522	34298517	-	1996	783	783	8	260	29.238	-2.5	6.047	-0.24	1	PF00210 (1);		AT3G11050.1	98	6e-122	69
		Gh_A09G2418	WGD/segmental	Ferritin-3, chloroplastic	scaffold2301_A09	23423	25618	-	2196	774	774	7	257	28.824	0	6.509	-0.238	1	PF00210 (1);		AT5G01600.1	68	2e-96	78
		Gh_D09G1582	WGD/segmental	Ferritin-3, chloroplastic	D09	43411917	43414052	-	2136	780	780	8	259	29.046	-1.5	6.286	-0.31	1	PF00210 (1);		AT5G01600.1	79	6e-120	79
		Gh_A10G2147	WGD/segmental	Ferritin-3, chloroplastic	A10	100299355	100305158	+	5804	1296	1296	16	431	48.38	14.5	9.306	-0.35	1	PF00210 (1);		AT2G40300.1	45	1e-112	81
		Gh_D10G2394	WGD/segmental	Ferritin-3, chloroplastic	D10	62951428	62955862	+	4435	954	954	10	317	35.761	2.5	7.198	-0.358	1	PF00210 (1);		AT2G40300.1	62	1e-114	82
		Gh_D04G0674	Dispersed	Ferritin-3, chloroplastic	D04	13192762	13194752	-	1991	792	792	8	263	29.238	3.5	7.128	-0.106	1	PF00210 (1);		AT3G11050.1	98	4e-106	62
		Gh_Sca005799G01	Dispersed	Ferritin-2, chloroplastic	scaffold5799	10133	13816	-	3684	813	813	9	271	30.189	6.5	8.493	-0.134	1	PF00210 (1);		AT3G11050.1	93	3e-95	59
NADPH oxidase	G. arboretum	Cotton_A_38536	Dispersed	Respiratory burst oxidase homolog protein A	Chr07	111881839	111888901	+	7063	2790	2790	14	929	105.976	34.5	9.635	-0.225	4	PF08414 (1); PF01794 (1); PF08022 (1); PF08030 (1);		AT1G64060.1	99	0	79
NADPH + e- + O2 → NADP- + O2- + H+ (?)		Cotton_A_31123	Dispersed	Respiratory burst oxidase homolog protein A	Chr03	11466232	11477440	-	11209	2616	2616	15	871	99.847	27.5	9.358	-0.222	4	PF08414 (1); PF01794 (1); PF08022 (1); PF08030 (1);		AT1G64060.1	100	0	67
		Cotton_A_23171	Dispersed	Respiratory burst oxidase homolog protein F	Chr10	30973779	30980330	+	6552	2541	2541	14	846	95.663	25	9.417	-0.234	4	PF08414 (1); PF01794 (1); PF08022 (1); PF08030 (1);		AT1G64060.1	64	0	83
		Cotton_A_29320	Dispersed	Respiratory burst oxidase homolog protein B	Chr04	62602318	62606964	-	4647	2655	2655	12	884	100.822	32	9.512	-0.309	4	PF08414 (1); PF01794 (1); PF08022 (1); PF08030 (1);		AT1G09090.2	96	0	70
		Cotton_A_16216	Dispersed	Respiratory burst oxidase homolog protein C	Chr12	17846186	17852922	+	6737	2760	2760	12	919	103.988	28.5	8.914	-0.298	4	PF08414 (1); PF01794 (1); PF08022 (1); PF08030 (1);		AT5G51060.1	99	0	66
		Cotton_A_03631	WGD/segmental	Respiratory burst oxidase homolog protein C	Chr01	66996228	67004202	+	7975	2724	2724	11	907	102.944	38.5	9.53	-0.28	4	PF08414 (1); PF01794 (1); PF08022 (1); PF08030 (1);		AT5G51060.1	99	0	69
		Cotton_A_07974	WGD/segmental	Respiratory burst oxidase homolog protein C	Chr06	115992732	115998284	-	5553	2748	2748	12	915	103.637	38.5	9.447	-0.304	4	PF08414 (1); PF01794 (1); PF08022 (1); PF08030 (1);		AT5G51060.1	97	0	69
		Cotton_A_33534	Dispersed	Respiratory burst oxidase homolog protein D	Chr07	104586422	104590103	-	3682	2751	2751	11	916	104.133	31	9.443	-0.28	4	PF08414 (1); PF01794 (1); PF08022 (1); PF08030 (1);		AT5G47910.1	99	0	74
		Cotton_A_13752	WGD/segmental	Respiratory burst oxidase homolog protein D	Chr08	15573735	15577658	-	3924	2799	2799	12	933	105.271	28.5	9.307	-0.243	4	PF08414 (1); PF01794 (1); PF08022 (1); PF08030 (1);		AT5G47910.1	99	0	74
		Cotton_A_18772	WGD/segmental	Respiratory burst oxidase homolog protein D	Chr10	46503475	46507115	+	3641	2619	2619	11	872	98.556	29	9.403	-0.258	4	PF08414 (1); PF01794 (1); PF08022 (1); PF08030 (1);		AT5G47910.1	99	0	77
		Cotton_A_37931	Dispersed	Respiratory burst oxidase homolog protein E	Chr07	98214081	98215250	-	1170	900	900	4	299	33.878	21	10.487	0.19	1	PF08030 (1);		AT1G19230.2	60	9e-69	56
		Cotton_A_05673	Dispersed	Respiratory burst oxidase homolog protein E	Chr01	2282778	2288775	-	5998	3045	3045	15	1015	115.467	32	9.242	-0.166	4	PF08414 (1); PF01794 (1); PF08022 (1); PF08030 (1);		AT1G19230.2	96	0	60
		Cotton_A_13344	Dispersed	Respiratory burst oxidase homolog protein F	Chr06	98939017	98946687	+	7671	2412	2412	14	803	91.052	27	9.151	-0.09	4	PF08414 (1); PF01794 (1); PF08022 (1); PF08030 (1);		AT1G64060.1	97	0	47
		Cotton_A_24667	Dispersed	Putative respiratory burst oxidase homolog protein H	Chr01	119438005	119441783	+	3779	2622	2622	14	873	99.905	33	9.374	-0.292	4	PF08414 (1); PF01794 (1); PF08022 (1); PF08030 (1);		AT5G60010.1	99	0	59
	G. raimondii	Gorai.003G085100	WGD/segmental	Respiratory burst oxidase homolog protein A	Chr03	21397172	21405595	-	8424	3641	2790	14	929	105.877	35	9.67	-0.204	4	PF08414 (1); PF01794 (1); PF08022 (1); PF08030 (1);		AT1G64060.1	99	0	79
		Gorai.004G137300	WGD/segmental	Respiratory burst oxidase homolog protein A	Chr04	38403501	38410198	-	6698	3074	2766	14	921	105.064	36.5	9.705	-0.218	4	PF08414 (1); PF01794 (1); PF08022 (1); PF08030 (1);		AT1G64060.1	99	0	75
		Gorai.008G250500	WGD/segmental	Respiratory burst oxidase homolog protein A	Chr08	53444134	53451583	+	7450	3598	2787	14	928	105.773	35	9.755	-0.235	4	PF08414 (1); PF01794 (1); PF08022 (1); PF08030 (1);		AT1G64060.1	99	0	79
		Gorai.007G299500	Dispersed	Respiratory burst oxidase homolog protein B	Chr07	51137164	51142401	+	5238	2979	2655	13	884	100.857	32.5	9.521	-0.315	4	PF08414 (1); PF01794 (1); PF08022 (1); PF08030 (1);		AT1G09090.2	96	0	70
		Gorai.003G117900	Dispersed	Respiratory burst oxidase homolog protein C	Chr03	35711880	35719260	-	7381	3299	2760	12	919	103.741	30.5	9.012	-0.263	4	PF08414 (1); PF01794 (1); PF08022 (1); PF08030 (1);		AT5G51060.1	97	0	67
		Gorai.001G053300	WGD/segmental	Respiratory burst oxidase homolog protein C	Chr01	5075477	5082571	+	7095	2986	2724	11	907	102.744	32.5	9.248	-0.229	4	PF08414 (1); PF01794 (1); PF08022 (1); PF08030 (1);		AT5G51060.1	99	0	68
		Gorai.008G212100	WGD/segmental	Respiratory burst oxidase homolog protein C	Chr08	49852054	49858167	-	6114	2986	2763	11	920	104.432	36.5	9.122	-0.281	4	PF08414 (1); PF01794 (1); PF08022 (1); PF08030 (1);		AT5G51060.1	94	0	68
		Gorai.002G128200	WGD/segmental	Respiratory burst oxidase homolog protein D	Chr02	19755039	19758915	+	3877	2999	2361	11	786	89.002	20	9.081	-0.218	4	PF08414 (1); PF01794 (1); PF08022 (1); PF08030 (1);		AT5G47910.1	95	0	74
		Gorai.009G202500	WGD/segmental	Respiratory burst oxidase homolog protein D	Chr09	15702162	15706217	+	4056	2937	2811	12	936	105.408	28.5	9.297	-0.264	4	PF08414 (1); PF01794 (1); PF08022 (1); PF08030 (1);		AT5G47910.1	99	0	74
		Gorai.009G273400	WGD/segmental	Respiratory burst oxidase homolog protein D	Chr09	22885462	22889737	+	4276	3253	2793	11	930	104.661	30	9.434	-0.295	4	PF08414 (1); PF01794 (1); PF08022 (1); PF08030 (1);		AT5G47910.1	99	0	75
		Gorai.001G017400	Dispersed	Respiratory burst oxidase homolog protein E	Chr01	1596440	1603268	-	6829	3755	2832	14	943	106.979	23.5	8.877	-0.185	4	PF08414 (1); PF01794 (1); PF08022 (1); PF08030 (1);		AT1G19230.2	96	0	65
		Gorai.008G199100	Dispersed	Respiratory burst oxidase homolog protein F	Chr08	48380739	48388590	-	7852	2940	2409	14	802	90.656	28	9.217	-0.055	4	PF08414 (1); PF01794 (1); PF08022 (1); PF08030 (1);		AT1G64060.1	98	0	46
		Gorai.001G106500	Dispersed	Putative respiratory burst oxidase homolog protein H	Chr01	11992089	11995872	-	3784	2526	2526	13	841	95.959	30	9.327	-0.322	4	PF08414 (1); PF01794 (1); PF08022 (1); PF08030 (1);		AT5G60010.1	99	0	56
	G. hirsutum	Gh_A02G1791	Dispersed	Respiratory burst oxidase homolog protein A	scaffold413_A02	53689	60746	-	7058	2793	2793	14	930	106.006	34.5	9.635	-0.22	4	PF08414 (1); PF01794 (1); PF08022 (1); PF08030 (1);		AT1G64060.1	99	0	79
		Gh_D03G0688	WGD/segmental	Respiratory burst oxidase homolog protein A	D03	24061389	24068512	+	7124	2790	2790	14	929	105.873	36.5	9.707	-0.211	4	PF08414 (1); PF01794 (1); PF08022 (1); PF08030 (1);		AT1G64060.1	99	0	79
		Gh_A08G0982	WGD/segmental	Respiratory burst oxidase homolog protein A	A08	68625165	68666345	-	41181	2256	2256	15	751	86.451	40.5	10.112	-0.143	4	PF08414 (1); PF01794 (1); PF08022 (1); PF08030 (1);		AT1G64060.1	78	0	69
		Gh_D08G1257	WGD/segmental	Respiratory burst oxidase homolog protein A	D08	41136123	41143012	-	6890	2769	2769	14	922	105.2	35	9.633	-0.216	4	PF08414 (1); PF01794 (1); PF08022 (1); PF08030 (1);		AT1G64060.1	99	0	75
		Gh_A12G2669	WGD/segmental	Respiratory burst oxidase homolog protein A	scaffold3404_A12	26809	33492	-	6684	2790	2790	14	929	105.811	32.5	9.668	-0.231	4	PF08414 (1); PF01794 (1); PF08022 (1); PF08030 (1);		AT1G64060.1	99	0	78
		Gh_D12G2750	WGD/segmental	Respiratory burst oxidase homolog protein A	scaffold4588_D12	62625	69256	+	6632	2787	2787	14	928	105.74	35	9.755	-0.237	4	PF08414 (1); PF01794 (1); PF08022 (1); PF08030 (1);		AT1G64060.1	99	0	78
		Gh_A11G2426	WGD/segmental	Respiratory burst oxidase homolog protein B	A11	82479840	82484514	+	4675	2655	2655	12	884	100.742	34	9.556	-0.313	4	PF08414 (1); PF01794 (1); PF08022 (1); PF08030 (1);		AT1G09090.2	96	0	69
		Gh_D11G2743	WGD/segmental	Respiratory burst oxidase homolog protein B	D11	56977773	56982441	+	4669	2655	2655	12	884	100.827	32	9.512	-0.316	4	PF08414 (1); PF01794 (1); PF08022 (1); PF08030 (1);		AT1G09090.2	96	0	70
		Gh_D07G1961	Dispersed	Respiratory burst oxidase homolog protein C	D07	48857715	48857954	+	240	240	240	1	79	9.487	12	10.955	0.146	NA	-		AT5G47910.1	78	1e-25	71
		Gh_Sca042593G01	Dispersed	Respiratory burst oxidase homolog protein D	scaffold42593	238	663	+	426	426	426	1	142	16.594	10.5	10.236	-0.025	NA	-		AT5G47910.1	100	8e-80	82
		Gh_A03G0476	WGD/segmental	Respiratory burst oxidase homolog protein C	A03	10416355	10426420	+	10066	2715	2715	12	904	102.661	25.5	8.65	-0.275	4	PF08414 (1); PF01794 (1); PF08022 (1); PF08030 (1);		AT5G51060.1	99	0	61
		Gh_D03G1062	WGD/segmental	Respiratory burst oxidase homolog protein C	D03	35789027	35795976	-	6950	2760	2760	12	919	103.841	29	8.91	-0.264	4	PF08414 (1); PF01794 (1); PF08022 (1); PF08030 (1);		AT5G51060.1	99	0	66
		Gh_Sca015744G01	Dispersed	Respiratory burst oxidase homolog protein C	scaffold15744	631	1107	+	477	330	330	2	109	12.573	7	9.141	-0.579	1	PF08030 (1);		AT5G51060.1	99	2e-59	81
		Gh_A07G0398	WGD/segmental	Respiratory burst oxidase homolog protein C	A07	5035106	5042836	+	7731	2724	2724	11	907	102.93	38.5	9.527	-0.277	4	PF08414 (1); PF01794 (1); PF08022 (1); PF08030 (1);		AT5G51060.1	99	0	69
		Gh_D07G0463	WGD/segmental	Respiratory burst oxidase homolog protein C	D07	4945697	4952499	+	6803	2724	2724	11	907	102.698	30.5	9.122	-0.235	4	PF08414 (1); PF01794 (1); PF08022 (1); PF08030 (1);		AT5G51060.1	99	0	68
		Gh_A12G1774	WGD/segmental	Respiratory burst oxidase homolog protein C	A12	80045991	80051555	-	5565	2757	2757	12	918	104.025	38.5	9.445	-0.308	4	PF08414 (1); PF01794 (1); PF08022 (1); PF08030 (1);		AT5G51060.1	97	0	68
		Gh_D12G1932	WGD/segmental	Respiratory burst oxidase homolog protein C	D12	52224716	52230284	-	5569	2757	2757	12	918	104.161	41.5	9.447	-0.295	4	PF08414 (1); PF01794 (1); PF08022 (1); PF08030 (1);		AT5G51060.1	97	0	69
		Gh_A01G0943	WGD/segmental	Respiratory burst oxidase homolog protein D	A01	24768615	24772247	+	3633	2574	2574	12	857	97.033	23	8.953	-0.286	4	PF08414 (1); PF01794 (1); PF08022 (1); PF08030 (1);		AT5G47910.1	99	0	67
		Gh_D01G0990	WGD/segmental	Respiratory burst oxidase homolog protein D	D01	17844890	17848513	+	3624	2823	2823	10	940	107.076	28.5	9.128	-0.217	4	PF08414 (1); PF01794 (1); PF08022 (1); PF08030 (1);		AT5G47910.1	99	0	72
		Gh_A05G1666	WGD/segmental	Respiratory burst oxidase homolog protein D	A05	17356320	17359403	+	3084	2166	2166	10	721	81.223	26	9.67	-0.185	3	PF08414 (1); PF01794 (1); PF08022 (1);		AT5G47910.1	99	0	73
		Gh_D05G1864	Dispersed	Respiratory burst oxidase homolog protein D	D05	17016832	17023628	+	6797	2742	2742	12	913	102.568	27.5	9.373	-0.27	4	PF08414 (1); PF01794 (1); PF08022 (1); PF08030 (1);		AT5G47910.1	98	0	73
		Gh_A05G2211	WGD/segmental	Respiratory burst oxidase homolog protein D	A05	25562865	25570955	+	8091	2550	2550	11	849	94.751	31.5	9.513	-0.298	4	PF08414 (1); PF01794 (1); PF08022 (1); PF08030 (1);		AT5G47910.1	63	0	80
		Gh_D05G2471	WGD/segmental	Respiratory burst oxidase homolog protein D	D05	24821383	24825199	+	3817	2799	2799	11	932	105.014	28	9.331	-0.302	4	PF08414 (1); PF01794 (1); PF08022 (1); PF08030 (1);		AT5G47910.1	99	0	75
		Gh_Sca067051G01	Dispersed	Putative respiratory burst oxidase homolog protein H	scaffold67051	37	521	+	485	324	324	3	108	12.214	-10	4.214	-0.629	2	PF08414 (1); PF13405 (1);		AT5G60010.1	100	5e-47	68
		Gh_A07G0143	WGD/segmental	Respiratory burst oxidase homolog protein E	A07	1792736	1798327	-	5592	2262	2262	11	753	85.606	27	9.363	-0.116	4	PF08414 (1); PF01794 (1); PF08022 (1); PF08030 (1);		AT1G19230.2	82	0	61
		Gh_D07G0136	WGD/segmental	Respiratory burst oxidase homolog protein E	D07	1438083	1443321	-	5239	2262	2262	11	753	85.605	26	9.285	-0.102	4	PF08414 (1); PF01794 (1); PF08022 (1); PF08030 (1);		AT1G19230.2	82	0	62
		Gh_Sca061303G01	Dispersed	Respiratory burst oxidase homolog protein E	scaffold61303	230	637	-	408	324	324	2	108	12.164	1	6.97	-0.655	1	PF08030 (1);		AT1G19230.2	100	1e-45	72
		Gh_A12G2653	Dispersed	Respiratory burst oxidase homolog protein F	scaffold3396_A12	21385	29027	+	7643	2412	2412	14	803	91.066	28	9.219	-0.09	4	PF08414 (1); PF01794 (1); PF08022 (1); PF08030 (1);		AT1G64060.1	97	0	47
		Gh_D12G1807	Dispersed	Respiratory burst oxidase homolog protein F	D12	50585049	50592640	-	7592	2409	2409	14	802	90.83	25	9.005	-0.081	4	PF08414 (1); PF01794 (1); PF08022 (1); PF08030 (1);		AT1G64060.1	98	0	46
		Gh_A07G0856	WGD/segmental	Putative respiratory burst oxidase homolog protein H	A07	14801554	14805328	-	3775	2526	2526	13	841	95.916	27.5	9.16	-0.309	4	PF08414 (1); PF01794 (1); PF08022 (1); PF08030 (1);		AT5G60010.1	99	0	57
		Gh_D07G0928	WGD/segmental	Putative respiratory burst oxidase homolog protein H	D07	12164885	12168659	-	3775	2526	2526	13	841	95.926	29	9.273	-0.318	4	PF08414 (1); PF01794 (1); PF08022 (1); PF08030 (1);		AT5G60010.1	99	0	56
NADPH oxidase-like	G. arboretum	Cotton_A_23480	Dispersed	NADH dehydrogenase [ubiquinone] iron-sulfur protein 4, mitochondrial	Chr10	20791390	20792950	+	1561	474	474	5	157	17.632	7.5	9.818	-0.701	1	PF04800 (1);		AT5G67590.1	85	3e-67	71
NADPH + e- + O2 → NADP- + O2- + H+		Cotton_A_17317	Dispersed	Ferric reduction oxidase 8, mitochondrial	Chr10	8945071	8948401	+	3331	2610	2181	8	726	82.024	37	9.887	0.286	3	PF01794 (1); PF08022 (1); PF08030 (1);		AT5G50160.1	97	0	52
		Cotton_A_38430	Dispersed	Ferric reduction oxidase 2	Chr01	15272312	15275852	-	3541	2058	2058	8	686	77.072	28.5	9.424	0.326	3	PF01794 (1); PF08022 (1); PF08030 (1);		AT1G01580.1	99	0	51
		Cotton_A_31253	Dispersed	Ferric reduction oxidase 4	Chr03	93252015	93259491	+	7477	1986	1986	7	661	75.216	21	8.92	0.373	3	PF01794 (1); PF08022 (1); PF08030 (1);		AT5G23980.1	99	0	58
		Cotton_A_38817	Dispersed	Ferric reduction oxidase 7, chloroplastic	scaffold4336	2968	6719	+	3752	2672	2202	9	733	82.227	17	8.51	0.44	3	PF01794 (1); PF08022 (1); PF08030 (1);		AT5G49740.1	96	0	65
		Cotton_A_10830	Dispersed	NADH dehydrogenase [ubiquinone] iron-sulfur protein 4, mitochondrial	Chr06	57210634	57213318	-	2685	471	471	5	156	17.132	7.5	10.193	-0.524	1	PF04800 (1);		AT5G67590.1	88	4e-74	78
		Cotton_A_15115	Dispersed	Ferric reduction oxidase 2	Chr07	99893553	99897336	-	3784	2100	2100	8	699	78.675	36	10.118	0.245	3	PF01794 (1); PF08022 (1); PF08030 (1);		AT1G01580.1	99	0	55
	G. raimondii	Gorai.009G220600	WGD/segmental	NADH dehydrogenase [ubiquinone] iron-sulfur protein 4, mitochondrial	Chr09	17104053	17106016	+	1964	857	474	5	157	17.618	7	9.818	-0.727	1	PF04800 (1);		AT5G67590.1	96	2e-67	65
		Gorai.009G267500	Dispersed	Ferric reduction oxidase 8, mitochondrial	Chr09	22230413	22233883	-	3471	2752	2184	8	727	81.987	39.5	9.998	0.264	3	PF01794 (1); PF08022 (1); PF08030 (1);		AT5G50160.1	97	0	52
		Gorai.006G050400	Proximal	Ferric reduction oxidase 2	Chr06	17246694	17250232	-	3539	2058	2058	8	685	77.394	24.5	9.288	0.319	3	PF01794 (1); PF08022 (1); PF08030 (1);		AT1G01580.1	100	0	51
		Gorai.006G050700	Proximal	Ferric reduction oxidase 4	Chr06	17340142	17345813	-	5672	2696	2097	7	698	79.202	23	9.021	0.337	3	PF01794 (1); PF08022 (1); PF08030 (1);		AT5G23980.1	99	0	61
		Gorai.011G242100	Dispersed	Ferric reduction oxidase 7, chloroplastic	Chr11	56893289	56897343	-	4055	2926	2202	9	733	82.026	15.5	8.389	0.435	3	PF01794 (1); PF08022 (1); PF08030 (1);		AT5G49740.1	96	0	64
		Gorai.007G056600	WGD/segmental	NADH dehydrogenase [ubiquinone] iron-sulfur protein 4, mitochondrial	Chr07	3987249	3990490	+	3242	958	471	5	156	17.18	9	10.433	-0.548	1	PF04800 (1);		AT5G67590.1	96	2e-74	73
		Gorai.007G101800	Dispersed	Ferric reduction oxidase 2	Chr07	7571735	7577325	-	5591	2369	2184	7	727	82.14	40	10.135	0.242	3	PF01794 (1); PF08022 (1); PF08030 (1);		AT1G01580.1	99	0	53
	G. hirsutum	Gh_A05G1830	WGD/segmental	NADH dehydrogenase [ubiquinone] iron-sulfur protein 4, mitochondrial	A05	19151445	19153006	+	1562	474	474	5	157	17.632	7.5	9.818	-0.701	1	PF04800 (1);		AT5G67590.1	85	3e-67	71
		Gh_D05G2027	WGD/segmental	NADH dehydrogenase [ubiquinone] iron-sulfur protein 4, mitochondrial	D05	18586352	18587932	+	1581	474	474	5	157	17.627	7.5	9.818	-0.725	1	PF04800 (1);		AT5G67590.1	96	1e-67	65
		Gh_A05G2158	WGD/segmental	Ferric reduction oxidase 8, mitochondrial	A05	24639382	24642283	-	2902	2184	2184	8	727	81.966	34.5	9.79	0.288	3	PF01794 (1); PF08022 (1); PF08030 (1);		AT5G50160.1	97	0	51
		Gh_D05G2413	WGD/segmental	Ferric reduction oxidase 8, mitochondrial	D05	24154306	24157207	-	2902	2184	2184	8	727	82.002	38.5	9.965	0.259	3	PF01794 (1); PF08022 (1); PF08030 (1);		AT5G50160.1	97	0	51
		Gh_A09G0418	WGD/segmental	Ferric reduction oxidase 2	A09	29502765	29506294	-	3530	2055	2055	8	684	76.999	28.5	9.428	0.321	3	PF01794 (1); PF08022 (1); PF08030 (1);		AT1G01580.1	100	0	51
		Gh_A09G0420	Proximal	Ferric reduction oxidase 4	A09	29716816	29725020	-	8205	2214	2214	6	737	83.779	22.5	8.823	0.331	3	PF01794 (1); PF08022 (1); PF08030 (1);		AT5G23980.1	99	0	58
		Gh_D09G0429	WGD/segmental	Ferric reduction oxidase 2	D09	18160322	18259701	-	99380	2070	2070	7	689	77.421	21	9.019	0.338	3	PF01794 (1); PF08022 (1); PF08030 (1);		AT1G01580.1	99	0	51
		Gh_A10G1862	WGD/segmental	Ferric reduction oxidase 7, chloroplastic	A10	94927832	94931120	-	3289	2202	2202	9	733	82.229	15	8.263	0.436	3	PF01794 (1); PF08022 (1); PF08030 (1);		AT5G49740.1	96	0	64
		Gh_D10G2127	WGD/segmental	Ferric reduction oxidase 7, chloroplastic	D10	58231713	58235028	-	3316	2283	2283	8	760	85.456	18	8.501	0.454	3	PF01794 (1); PF08022 (1); PF08030 (1);		AT5G49740.1	96	0	62
		Gh_A11G0450	WGD/segmental	NADH dehydrogenase [ubiquinone] iron-sulfur protein 4, mitochondrial	A11	4229634	4232312	+	2679	471	471	5	156	17.15	9	10.433	-0.532	1	PF04800 (1);		AT5G67590.1	96	2e-74	73
		Gh_D11G0521	WGD/segmental	NADH dehydrogenase [ubiquinone] iron-sulfur protein 4, mitochondrial	D11	4553531	4556285	+	2755	471	471	5	156	17.161	8.5	10.319	-0.54	1	PF04800 (1);		AT5G67590.1	96	2e-74	73
		Gh_A11G0819	WGD/segmental	Ferric reduction oxidase 2	A11	8188056	8191838	-	3783	2100	2100	8	699	78.837	35.5	10.077	0.237	3	PF01794 (1); PF08022 (1); PF08030 (1);		AT1G01580.1	99	0	55
		Gh_D11G0960	WGD/segmental	Ferric reduction oxidase 2	D11	8333251	8341915	-	8665	2199	2199	8	732	82.618	42.5	10.192	0.245	3	PF01794 (1); PF08022 (1); PF08030 (1);		AT1G01580.1	99	0	53
Alternative Oxidase (AOX)	G. arboretum	Cotton_A_24166	Tandem	Ubiquinol oxidase, mitochondrial	Chr05	48871744	48873467	+	1724	1101	1101	4	366	41.948	11.5	8.918	-0.195	1	PF01786 (1);		AT5G64210.1	83	2e-151	70
2e- + 2H+ + O2 → H2O		Cotton_A_24165	Tandem	Ubiquinol oxidase, mitochondrial	Chr05	48867749	48870100	+	2352	1496	1035	4	344	39.462	11.5	9.176	-0.321	1	PF01786 (1);		AT5G64210.1	85	3e-166	77
		Cotton_A_29399	Dispersed	Ubiquinol oxidase, mitochondrial	Chr12	112279716	112282702	-	2987	1020	1020	4	339	38.651	10.5	9.126	-0.27	1	PF01786 (1);		AT5G64210.1	85	2e-156	73
		Cotton_A_04649	Dispersed	Ubiquinol oxidase 4, chloroplastic/chromoplastic	Chr10	19943002	19946152	-	3151	1481	1083	9	360	41.764	-2.5	6.143	-0.414	1	PF01786 (1);		AT4G22260.1	83	7e-174	78
		Cotton_A_26600	Proximal	Ubiquinol oxidase 1a, mitochondrial	Chr06	119198052	119199336	-	1285	996	996	4	331	37.574	8	8.219	-0.305	1	PF01786 (1);		AT3G22370.1	100	0	69
	G. raimondii	Gorai.005G220400	WGD/segmental	Ubiquinol oxidase, mitochondrial	Chr05	60326314	60329009	-	2696	1942	1143	5	380	43.929	18	9.909	-0.228	1	PF01786 (1);		AT5G64210.1	72	6e-158	78
		Gorai.005G220500	Tandem	Ubiquinol oxidase, mitochondrial	Chr05	60330995	60333324	-	2330	1482	1032	4	343	39.253	10.5	8.995	-0.316	1	PF01786 (1);		AT5G64210.1	85	6e-166	76
		Gorai.012G142200	WGD/segmental	Ubiquinol oxidase, mitochondrial	Chr12	31555575	31560127	-	4553	2469	1011	4	336	38.413	9.5	8.93	-0.275	1	PF01786 (1);		AT5G64210.1	86	7e-157	73
		Gorai.009G182200	Singleton	Ubiquinol oxidase 4, chloroplastic/chromoplastic	Chr09	14019117	14022445	+	3329	1666	1083	9	360	41.872	-3.5	5.98	-0.43	1	PF01786 (1);		AT4G22260.1	96	6e-175	70
		Gorai.008G296600	Dispersed	Ubiquinol oxidase 1a, mitochondrial	Chr08	56941276	56943119	+	1844	1567	996	4	331	37.502	9	8.565	-0.275	1	PF01786 (1);		AT3G22370.1	100	0	70
	G. hirsutum	Gh_A03G1526	WGD/segmental	Ubiquinol oxidase, mitochondrial	A03	95922928	95929990	-	7063	1017	1017	4	338	38.591	11	8.999	-0.203	1	PF01786 (1);		AT5G64210.1	81	4e-156	77
		Gh_A03G1527	Tandem	Ubiquinol oxidase, mitochondrial	A03	95931955	95933845	-	1891	1035	1035	4	344	39.462	11.5	9.176	-0.321	1	PF01786 (1);		AT5G64210.1	85	3e-166	77
		Gh_Sca047319G01	Dispersed	Ubiquinol oxidase 2, mitochondrial	scaffold47319	71	558	+	488	381	381	2	126	14.413	-0.5	6.392	-0.004	1	PF01786 (1);		AT5G64210.1	100	4e-74	83
		Gh_A04G0970	WGD/segmental	Ubiquinol oxidase, mitochondrial	A04	59316361	59319347	-	2987	1017	1017	4	338	38.594	10.5	9.126	-0.27	1	PF01786 (1);		AT5G64210.1	85	2e-156	73
		Gh_D04G1513	WGD/segmental	Ubiquinol oxidase, mitochondrial	D04	47028801	47031732	-	2932	1011	1011	4	336	38.476	9.5	8.916	-0.268	1	PF01786 (1);		AT5G64210.1	86	4e-157	73
		Gh_A05G1491	WGD/segmental	Ubiquinol oxidase 4, chloroplastic/chromoplastic	A05	15288834	15291586	+	2753	1083	1083	9	360	41.772	-1	6.378	-0.412	1	PF01786 (1);		AT4G22260.1	83	1e-173	77
		Gh_D05G1662	WGD/segmental	Ubiquinol oxidase 4, chloroplastic/chromoplastic	D05	14893737	14896472	+	2736	1080	1080	9	359	41.785	-3.5	5.98	-0.429	1	PF01786 (1);		AT4G22260.1	96	6e-175	70
		Gh_A12G2493	WGD/segmental	Ubiquinol oxidase 1a, mitochondrial	A12	87346772	87348049	+	1278	996	996	4	331	37.445	8	8.313	-0.294	1	PF01786 (1);		AT3G22370.1	100	0	70
		Gh_D12G2621	WGD/segmental	Ubiquinol oxidase 1a, mitochondrial	D12	58992715	58993988	+	1274	996	996	4	331	37.466	9	8.565	-0.294	1	PF01786 (1);		AT3G22370.1	100	2e-180	70
Peroxiredoxin (PrxR)	G. arboretum	Cotton_A_39780	Dispersed	2-Cys peroxiredoxin BAS1-like, chloroplastic	Chr12	65843798	65847758	+	3961	798	798	7	265	29.045	0	6.538	-0.074	2	PF00578 (1); PF10417 (1);		AT5G06290.1	80	7e-141	89
2P-SH + H2O2 → P-S-S-P + 2H2O		Cotton_A_21231	Dispersed	1-Cys peroxiredoxin	Chr09	2796662	2797847	+	1186	660	660	4	219	24.556	-0.5	6.36	-0.474	2	PF00578 (1); PF10417 (1);		AT1G48130.1	100	6e-113	70
		Cotton_A_11172	WGD/segmental	Peroxiredoxin-2B	Chr11	56377181	56381211	+	4031	492	492	3	163	17.538	-1.5	5.676	0.074	1	PF08534 (1);		AT1G65980.1	99	2e-93	78
		Cotton_A_05384	Dispersed	Peroxiredoxin-2B	Chr10	48920020	48920950	-	931	489	489	3	162	17.5	-1	6.103	0.057	1	PF08534 (1);		AT1G65980.1	100	6e-85	73
		Cotton_A_14514	WGD/segmental	Peroxiredoxin-2B	Chr03	23214437	23216312	-	1876	933	489	3	162	17.197	-1.5	5.69	0.08	1	PF08534 (1);		AT1G65980.1	100	1e-98	85
		Cotton_A_00515	Dispersed	Peroxiredoxin-2E, chloroplastic	Chr02	68345531	68346214	+	684	684	684	1	227	24.136	6	9.52	0.071	1	PF08534 (1);		AT3G52960.1	99	9e-99	64
		Cotton_A_29838	Dispersed	Peroxiredoxin-2F, mitochondrial	Chr11	66033911	66035897	+	1987	597	597	5	198	21.445	5	9.326	-0.039	1	PF08534 (1);		AT3G06050.1	100	4e-103	74
		Cotton_A_11865	Dispersed	Peroxiredoxin Q, chloroplastic	Chr03	22356348	22358300	+	1953	651	651	4	216	23.846	16	10.324	-0.382	1	PF00578 (1);		AT3G26060.2	99	4e-95	67
	G. raimondii	Gorai.009G397800	Dispersed	2-Cys peroxiredoxin BAS1-like, chloroplastic	Chr09	56100514	56105218	-	4705	1441	798	7	265	29.043	0	6.538	-0.063	2	PF00578 (1); PF10417 (1);		AT5G06290.1	80	3e-140	88
		Gorai.002G157500	Dispersed	1-Cys peroxiredoxin PER1	Chr02	34175825	34176713	-	889	270	270	3	89	10.034	-1.5	5.582	-0.204	1	PF00578 (1);		AT1G48130.1	83	2e-33	69
		Gorai.011G204600	Dispersed	1-Cys peroxiredoxin	Chr11	49579270	49580743	+	1474	959	660	4	219	24.499	-0.5	6.36	-0.479	2	PF00578 (1); PF10417 (1);		AT1G48130.1	100	3e-114	71
		Gorai.001G249700	Dispersed	1-Cys peroxiredoxin PER1	Chr01	51099879	51100320	-	442	353	249	2	82	9.304	-1.5	5.538	-0.185	1	PF00578 (1);		AT1G48130.1	91	1e-37	75
		Gorai.009G026300	WGD/segmental	Peroxiredoxin-2B	Chr09	2005154	2007919	-	2766	1179	492	3	163	17.491	-0.5	6.256	0.04	1	PF08534 (1);		AT1G65980.1	99	8e-94	78
		Gorai.009G135600	WGD/segmental	Peroxiredoxin-2B	Chr09	10193477	10194845	-	1369	966	489	3	162	17.468	-1	6.103	0.099	1	PF08534 (1);		AT1G65980.1	100	6e-86	73
		Gorai.004G280800	WGD/segmental	Peroxiredoxin-2B	Chr04	61267661	61269611	-	1951	953	489	3	162	17.197	-1.5	5.69	0.08	1	PF08534 (1);		AT1G65980.1	100	1e-98	85
		Gorai.002G243200	Dispersed	Peroxiredoxin-2E, chloroplastic	Chr02	60733892	60734923	+	1032	1032	684	1	227	24.171	7	9.758	0.059	1	PF08534 (1);		AT3G52960.1	99	8e-98	64
		Gorai.011G158200	Dispersed	Peroxiredoxin-2F, mitochondrial	Chr11	28114223	28116745	-	2523	1015	612	5	203	21.924	3	8.648	-0.096	1	PF08534 (1);		AT3G06050.1	100	5e-100	72
		Gorai.004G285400	Dispersed	Peroxiredoxin Q, chloroplastic	Chr04	61634457	61636274	-	1818	1040	693	4	230	25.138	23	10.709	-0.264	1	PF00578 (1);		AT3G26060.2	63	1e-44	60
	G. hirsutum	Gh_A04G0493	WGD/segmental	2-Cys peroxiredoxin BAS1-like, chloroplastic	A04	26311787	26315757	-	3971	798	798	7	265	29.149	0	6.538	-0.069	2	PF00578 (1); PF10417 (1);		AT5G06290.1	80	2e-139	88
		Gh_D04G0917	WGD/segmental	2-Cys peroxiredoxin BAS1-like, chloroplastic	D04	26446572	26450644	-	4073	798	798	7	265	29.043	0	6.538	-0.063	2	PF00578 (1); PF10417 (1);		AT5G06290.1	80	3e-140	88
		Gh_D01G1239	Dispersed	1-Cys peroxiredoxin PER1	D01	30829303	30829673	-	371	321	321	2	106	11.969	-1.5	5.581	-0.047	1	PF00578 (1);		AT1G48130.1	97	7e-32	53
		Gh_D12G2827	Dispersed	2-Cys peroxiredoxin BAS1-like, chloroplastic	scaffold4651_D12	15048	17035	+	1988	423	423	6	140	16.074	-5	4.636	-0.049	1	PF00578 (1);		AT5G06290.1	56	2e-39	83
		Gh_A10G1567	WGD/segmental	1-Cys peroxiredoxin	A10	85538436	85539624	+	1189	660	660	4	219	24.556	-0.5	6.36	-0.474	2	PF00578 (1); PF10417 (1);		AT1G48130.1	100	6e-113	70
		Gh_D10G1825	WGD/segmental	1-Cys peroxiredoxin	D10	51342185	51343360	+	1176	660	660	4	219	24.393	0.5	6.676	-0.458	2	PF00578 (1); PF10417 (1);		AT1G48130.1	100	3e-112	71
		Gh_D05G0244	WGD/segmental	Peroxiredoxin-2B	D05	2202510	2204565	-	2056	441	441	3	146	15.755	1.5	7.507	-0.004	1	PF08534 (1);		AT1G65980.1	100	1e-82	76
		Gh_Sca011288G01	Dispersed	Peroxiredoxin-2C	scaffold11288	2158	2397	-	240	240	240	1	79	8.618	0.5	7.531	-0.242	1	PF08534 (1);		AT1G65970.1	99	2e-38	76
		Gh_A05G3849	WGD/segmental	Peroxiredoxin-2B	scaffold1232_A05	104118	105049	-	932	489	489	3	162	17.466	-1.5	5.69	0.096	1	PF08534 (1);		AT1G65980.1	100	8e-86	73
		Gh_D05G1251	WGD/segmental	Peroxiredoxin-2B	D05	10748631	10749537	-	907	489	489	3	162	17.454	-1	6.103	0.102	1	PF08534 (1);		AT1G65980.1	100	4e-86	73
		Gh_A08G2151	WGD/segmental	Peroxiredoxin-2B	A08	102615361	102616794	-	1434	489	489	3	162	17.227	-1.5	5.69	0.064	1	PF08534 (1);		AT1G65980.1	100	2e-98	85
		Gh_D08G2518	WGD/segmental	Peroxiredoxin-2B	D08	64930986	64932473	-	1488	489	489	3	162	17.197	-1.5	5.69	0.08	1	PF08534 (1);		AT1G65980.1	100	1e-98	85
		Gh_A01G1793	WGD/segmental	Peroxiredoxin-2E, chloroplastic	A01	97705624	97706307	+	684	684	684	1	227	24.096	6	9.52	0.085	1	PF08534 (1);		AT3G52960.1	99	1e-97	64
		Gh_D01G2034	WGD/segmental	Peroxiredoxin-2E, chloroplastic	D01	59334370	59335053	+	684	684	684	1	227	24.112	6	9.52	0.072	1	PF08534 (1);		AT3G52960.1	99	1e-97	63
		Gh_Sca157066G01	Dispersed	Peroxiredoxin-2E, chloroplastic	scaffold157066	5	247	-	243	171	171	2	56	6.129	-1	4.983	-0.227	NA	-		AT3G52960.1	100	8e-20	67
		Gh_A10G1104	WGD/segmental	Peroxiredoxin-2F, mitochondrial	A10	54462313	54464296	+	1984	597	597	5	198	21.446	5	9.326	-0.076	1	PF08534 (1);		AT3G06050.1	100	3e-102	74
		Gh_D10G1403	WGD/segmental	Peroxiredoxin-2F, mitochondrial	D10	28600472	28602454	-	1983	597	597	5	198	21.361	3	8.648	-0.043	1	PF08534 (1);		AT3G06050.1	100	2e-102	74
		Gh_A08G2202	WGD/segmental	Peroxiredoxin Q, chloroplastic	A08	103031734	103033703	-	1970	651	651	4	216	23.887	17	10.374	-0.396	1	PF00578 (1);		AT3G26060.2	99	6e-95	67
		Gh_D08G2567	WGD/segmental	Peroxiredoxin Q, chloroplastic	D08	65350134	65351542	-	1409	651	651	4	216	23.793	16	10.324	-0.354	1	PF00578 (1);		AT3G26060.2	99	1e-95	68
Thioredoxins (Trx)	G. arboretum	Cotton_A_35156	Dispersed	TPR repeat-containing thioredoxin TTL1	Chr07	93217963	93221270	-	3308	2109	2109	7	702	77.075	18	8.7	-0.458	3	PF13414 (2); PF00085 (1);		AT1G53300.1	98	0	64
P-S-S-P + 2H+ → 2P-SH		Cotton_A_34784	Singleton	Thioredoxin-like protein Clot	Chr12	29394960	29396122	-	1163	969	405	2	134	15.31	1	6.943	-0.404	1	PF06110 (1);		AT5G42850.1	90	1e-48	61
		Cotton_A_25417	WGD/segmental	Thioredoxin-like 3-3	Chr12	33999999	34000956	-	958	611	396	3	131	14.793	0.5	6.665	-0.626	1	PF00085 (1);		AT3G53220.1	94	1e-60	70
		Cotton_A_29674	WGD/segmental	Thioredoxin-like 3-3	Chr10	109195163	109199433	+	4271	510	510	5	169	19.793	1.5	6.867	-0.866	1	PF00085 (1);		AT3G53220.1	48	9e-49	85
		Cotton_A_35520	Dispersed	Thioredoxin-like protein CDSP32, chloroplastic	scaffold3380	26949	27851	+	903	903	903	1	300	33.815	1.5	6.733	-0.281	2	PF00085 (2);		AT1G76080.1	100	1e-142	69
		Cotton_A_29425	Dispersed	Thioredoxin-like protein 4B	Chr07	93055070	93055917	-	848	462	462	3	153	17.465	-4	5.183	0.151	1	PF02966 (1);		AT3G24730.1	80	1e-67	82
		Cotton_A_34846	Dispersed	Thioredoxin-like protein YLS8	Chr12	6096340	6097917	+	1578	429	429	2	142	16.575	-4	4.965	-0.17	1	PF02966 (1);		AT5G08290.1	100	4e-104	99
		Cotton_A_26492	Dispersed	Thioredoxin-like protein YLS8	Chr13	2305596	2307105	-	1510	396	396	2	131	15.131	-8	4.384	-0.021	1	PF02966 (1);		AT5G08290.1	98	3e-81	91
		Cotton_A_00107	Dispersed	Thioredoxin-like protein YLS8	Chr07	38188583	38191034	+	2452	429	429	2	142	16.574	-3	5.23	-0.187	1	PF02966 (1);		AT5G08290.1	100	2e-101	94
		Cotton_A_21246	Dispersed	Thioredoxin-like protein YLS8	Chr09	3044049	3044204	-	156	156	156	1	51	6.034	1.5	8.874	-0.449	1	PF02966 (1);		AT5G08290.1	100	3e-19	77
		Cotton_A_24493	Dispersed	Thioredoxin-like protein CITRX, chloroplastic	Chr09	38582261	38585498	-	3238	516	516	4	172	19.833	-1.5	5.727	-0.149	1	PF00085 (1);		AT3G06730.1	100	7e-88	69
		Cotton_A_23278	Dispersed	Thioredoxin F2, chloroplastic	Chr13	53770128	53772670	-	2543	1335	570	3	189	20.468	9.5	9.859	-0.102	1	PF00085 (1);		AT5G16400.1	94	1e-71	64
		Cotton_A_00791	Dispersed	Thioredoxin M3, chloroplastic	Chr05	7337651	7339100	+	1450	519	519	2	172	18.974	3.5	8.082	0.02	1	PF00085 (1);		AT2G15570.2	62	3e-53	70
		Cotton_A_10768	Dispersed	Thioredoxin M3, chloroplastic	Chr06	65691720	65693932	-	2213	892	510	2	169	18.697	3	8.463	-0.012	1	PF00085 (1);		AT2G15570.2	63	5e-59	76
		Cotton_A_14928	Dispersed	Thioredoxin M-type, chloroplastic	Chr12	106542401	106544002	-	1602	579	579	2	192	20.955	5.5	8.99	0.004	1	PF00085 (1);		AT4G03520.1	82	5e-61	59
		Cotton_A_13692	Dispersed	Thioredoxin M4, chloroplastic	Chr10	111237577	111240739	-	3163	1467	543	2	180	19.723	5.5	8.822	0.107	1	PF00085 (1);		AT3G15360.1	87	2e-61	59
		Cotton_A_16801	Dispersed	Thioredoxin M4, chloroplastic	Chr13	112226140	112227688	+	1549	1004	525	2	174	19.383	10.5	9.877	-0.076	1	PF00085 (1);		AT3G15360.1	88	1e-64	62
		Cotton_A_12753	WGD/segmental	Thioredoxin M-type, chloroplastic	Chr07	40905467	40906442	+	976	546	546	2	181	19.96	2.5	7.682	-0.049	1	PF00085 (1);		AT4G03520.1	64	8e-48	55
		Cotton_A_37443	Dispersed	Thioredoxin M-type, chloroplastic	Chr02	10587540	10588165	-	626	534	534	3	178	19.63	3	7.814	-0.119	1	PF00085 (1);		AT3G15360.1	75	6e-37	45
		Cotton_A_19603	WGD/segmental	Thioredoxin M-type, chloroplastic	Chr05	16101536	16102280	+	745	534	534	2	177	19.543	7.5	8.679	-0.031	1	PF00085 (1);		AT3G15360.1	80	5e-46	47
		Cotton_A_08647	Dispersed	Thioredoxin-like 4, chloroplastic	Chr10	16933770	16934853	+	1084	513	513	3	170	19.139	-10.5	4.514	-0.328	1	PF00085 (1);		AT1G07700.3	86	2e-80	78
		Cotton_A_39577	Dispersed	Thioredoxin O1, mitochondrial	Chr05	39409331	39412820	-	3490	1229	660	6	219	24.767	-1	5.514	-0.548	1	PF00085 (1);		AT2G35010.1	89	1e-41	43
		Cotton_A_37690	Singleton	Thioredoxin-like 3-1, chloroplastic	Chr12	126602187	126603564	+	1378	564	564	5	188	22.274	12	10.187	-0.555	1	PF00085 (1);		AT5G06690.2	80	1e-50	53
		Cotton_A_07613	Dispersed	TPR repeat-containing thioredoxin TDX	Chr11	53467893	53469826	+	1934	723	723	6	240	27.012	11	9.952	-0.448	2	PF13414 (1); PF00085 (1);		AT3G17880.1	100	3e-130	75
		Cotton_A_07614	Dispersed	TPR repeat-containing thioredoxin TDX	Chr11	53466870	53467793	+	924	411	411	4	136	14.888	-13	4.119	-0.696	NA	-		AT3G17880.1	97	3e-38	59
		Cotton_A_09913	WGD/segmental	TPR repeat-containing thioredoxin TDX	Chr03	15765038	15768584	-	3547	1167	1167	11	388	42.494	-11	4.884	-0.754	1	PF13414 (1);		AT3G17880.1	68	1e-104	61
		Cotton_A_38006	Dispersed	Thioredoxin H-type	Chr07	72793545	72794670	+	1126	659	348	3	115	12.768	0	6.503	0.23	1	PF00085 (1);		AT3G51030.1	97	2e-49	63
		Cotton_A_07839	WGD/segmental	Thioredoxin H-type	Chr11	73095343	73095716	-	374	264	264	2	87	9.917	3	9.141	0.143	1	PF00085 (1);		AT3G51030.1	91	1e-35	68
		Cotton_A_32417	WGD/segmental	Thioredoxin H-type	Chr07	124855739	124856798	+	1060	662	360	3	119	13.15	-1	5.694	0.132	1	PF00085 (1);		AT3G51030.1	92	7e-60	76
		Cotton_A_17053	WGD/segmental	Thioredoxin H-type	Chr09	56495496	56496970	-	1475	342	342	3	114	12.826	-4	4.755	-0.125	1	PF00085 (1);		AT3G51030.1	100	3e-66	78
		Cotton_A_04712	Dispersed	Thioredoxin-like protein CXXS1	Chr10	20427212	20428747	-	1536	784	378	3	125	14.154	-4	4.701	-0.126	1	PF00085 (1);		AT1G11530.1	90	2e-56	70
		Cotton_A_30566	Dispersed	Thioredoxin-like protein CXXS1	Chr11	24102153	24103600	+	1448	387	387	3	128	14.468	1.5	8.217	-0.074	1	PF00085 (1);		AT1G11530.1	91	5e-51	60
		Cotton_A_15590	Dispersed	Thioredoxin H-type	Chr08	74881173	74883417	-	2245	378	378	3	125	14.006	-3.5	4.737	-0.202	1	PF00085 (1);		AT3G08710.1	97	8e-47	54
		Cotton_A_12459	Dispersed	Thioredoxin H-type	Chr11	8450322	8453121	-	2800	1387	402	4	133	14.861	-3	4.921	-0.253	1	PF00085 (1);		AT3G08710.1	99	1e-68	74
		Cotton_A_19954	Dispersed	Thioredoxin H-type	Chr09	66744096	66745710	-	1615	405	405	4	134	14.973	-3.5	4.953	-0.375	1	PF00085 (1);		AT3G08710.1	90	3e-68	78
		Cotton_A_30823	Dispersed	Thioredoxin H2	Chr01	129671165	129671700	+	536	357	357	3	118	13.483	1.5	8.04	-0.288	1	PF00085 (1);		AT5G39950.1	97	4e-42	54
		Cotton_A_25024	Dispersed	Thioredoxin H2	Chr11	27090764	27091745	-	982	697	405	3	134	14.719	-2	5.217	-0.273	1	PF00085 (1);		AT5G39950.1	100	3e-59	64
		Cotton_A_29008	Dispersed	Thioredoxin H2	Chr12	54159113	54160756	+	1644	896	405	3	134	14.812	0	6.511	-0.264	1	PF00085 (1);		AT5G39950.1	96	1e-54	58
		Cotton_A_34850	Dispersed	Thioredoxin X, chloroplastic	Chr12	6125890	6126953	-	1064	921	552	2	183	20.15	2	8.044	-0.154	1	PF00085 (1);		AT1G50320.1	100	1e-66	59
		Cotton_A_33939	Dispersed	Thioredoxin Y1, chloroplastic	Chr10	6898973	6900510	-	1538	504	504	4	167	18.667	6	9.63	-0.166	1	PF00085 (1);		AT1G76760.1	96	1e-69	64
		Cotton_A_29887	Proximal	Thioredoxin-like protein HCF164, chloroplastic	Chr12	16032988	16041627	+	8640	777	777	5	259	28.912	2	7.145	-0.413	1	PF00085 (1);		AT4G37200.1	86	2e-99	63
		Cotton_A_29893	Proximal	Thioredoxin-like protein HCF164, chloroplastic	Chr12	16169257	16171549	-	2293	1252	783	4	260	28.952	-6	4.916	-0.424	1	PF00085 (1);		AT4G37200.1	85	1e-105	68
		Cotton_A_27006	Dispersed	Thioredoxin-like 2, chloroplastic	Chr13	23674113	23676398	+	2286	708	708	4	235	26.003	6.5	8.374	-0.194	1	PF00085 (1);		AT4G26160.1	62	3e-80	73
		Cotton_A_18057	WGD/segmental	Thioredoxin-like 2, chloroplastic	Chr08	58919894	58923333	-	3440	1057	717	4	238	26.341	11	9.32	-0.259	1	PF00085 (1);		AT4G26160.1	60	6e-77	73
		Cotton_A_09369	WGD/segmental	Thioredoxin-like 2-1, chloroplastic	Chr08	59420853	59422042	+	1190	606	606	4	201	22.597	9	8.685	-0.173	1	PF00085 (1);		AT4G26160.1	71	3e-74	70
		Cotton_A_13398	Dispersed	Thioredoxin-like 1-2, chloroplastic	Chr06	99706428	99707497	+	1070	780	780	4	259	28.68	9.5	8.552	-0.239	1	PF00085 (1);		AT5G61440.1	76	1e-77	59
		Cotton_A_35056	Dispersed	Thioredoxin-like 1-1, chloroplastic	Chr13	97146758	97148281	+	1524	864	864	4	287	32.143	17.5	9.853	-0.377	1	PF00085 (1);		AT1G08570.1	100	1e-115	61
		Cotton_A_24227	Dispersed	Thioredoxin-like 1-1, chloroplastic	Chr13	34073033	34075071	+	2039	816	816	4	271	30.816	24	10.284	-0.362	NA	-		AT1G08570.1	99	2e-79	49
		Cotton_A_18118	Dispersed	Thioredoxin-like 1-1, chloroplastic	Chr04	47853614	47855149	+	1536	840	840	4	279	31.143	15.5	9.509	-0.406	1	PF00085 (1);		AT1G08570.1	100	7e-112	61
		Cotton_A_02455	Dispersed	Thioredoxin-like protein AAED1, chloroplastic	Chr11	21268347	21270104	-	1758	633	633	7	210	23.228	11.5	9.947	-0.296	NA	-		AT2G37240.1	72	1e-67	65
		Cotton_A_06428	Dispersed	Thioredoxin-like protein AAED1, chloroplastic	Chr12	5001725	5004433	-	2709	1337	783	7	260	28.554	8	8.832	-0.083	1	PF13911 (1);		AT5G65840.1	78	1e-109	72
		Cotton_A_32580	Dispersed	Thioredoxin-like protein AAED1, chloroplastic	Chr06	59790128	59791459	+	1332	765	765	8	255	27.866	1	6.89	-0.06	1	PF13911 (1);		AT5G65840.1	76	1e-94	68
		Cotton_A_35720	Dispersed	TPR repeat-containing thioredoxin TTL1	Chr08	95951347	95953912	+	2566	2094	2094	6	697	77.348	34	9.619	-0.505	5	PF13414 (2); PF07719 (1); PF13371 (1); PF00085 (1);		AT5G65160.1	64	1e-150	50
		Cotton_A_34121	Dispersed	Inactive TPR repeat-containing thioredoxin TTL3	Chr07	36381465	36383515	-	2051	1743	1743	4	580	64.118	23	9.305	-0.776	3	PF13414 (2); PF07719 (1);		AT5G65160.1	99	0	55
		Cotton_A_10879	Dispersed	TPR repeat-containing thioredoxin TTL4	Chr06	56794430	56797432	-	3003	2222	1620	5	539	60.582	24	9.586	-0.706	4	PF13414 (2); PF07719 (2);		AT5G65160.1	80	2e-176	58
		Cotton_A_31024	Dispersed	Inactive TPR repeat-containing thioredoxin TTL3	Chr09	9207489	9210635	-	3147	1764	1764	5	587	65.05	26.5	9.755	-0.67	4	PF13414 (2); PF07719 (1); PF13428 (1);		AT5G65160.1	99	0	54
		Cotton_A_20576	Dispersed	Inactive TPR repeat-containing thioredoxin TTL3	Chr11	49321384	49324363	-	2980	2037	2037	7	678	73.799	20.5	9.118	-0.374	4	PF13414 (2); PF07719 (1); PF00085 (1);		AT2G42580.1	100	0	58
		Cotton_A_20155	Dispersed	TPR repeat-containing thioredoxin TTL1	Chr03	24235002	24239051	-	4050	1836	1836	7	611	67.362	16.5	8.398	-0.386	4	PF13414 (2); PF07719 (1); PF00085 (1);		AT1G53300.1	88	0	66
	G. raimondii	Gorai.002G061800	Dispersed	TPR repeat-containing thioredoxin TTL1	Chr02	7292682	7297237	-	4556	2901	2115	7	704	77.16	18.5	8.794	-0.46	3	PF13414 (2); PF00085 (1);		AT1G53300.1	98	0	64
		Gorai.006G116100	Singleton	Thioredoxin-like protein Clot	Chr06	36505960	36506966	+	1007	794	405	2	134	15.259	1	6.931	-0.381	1	PF06110 (1);		AT5G42850.1	90	8e-50	62
		Gorai.009G414400	WGD/segmental	Thioredoxin-like 3-3	Chr09	63340052	63341145	+	1094	742	396	3	131	14.787	1	6.781	-0.616	1	PF00085 (1);		AT3G53220.1	94	5e-61	70
		Gorai.006G162600	WGD/segmental	Thioredoxin-like 3-3	Chr06	42203281	42204163	+	883	789	264	2	87	10.236	1	6.905	-0.376	1	PF00085 (1);		AT3G53220.1	92	5e-41	78
		Gorai.009G191100	Dispersed	Thioredoxin-like protein CDSP32, chloroplastic	Chr09	14726656	14728173	+	1518	1518	903	1	300	33.752	0.5	6.584	-0.294	2	PF00085 (2);		AT1G76080.1	100	1e-141	69
		Gorai.002G053700	Dispersed	Thioredoxin-like protein 4B	Chr02	4750869	4752913	+	2045	899	456	3	151	17.238	0	6.514	0.03	1	PF02966 (1);		AT3G24730.1	100	1e-92	84
		Gorai.012G134400	WGD/segmental	Thioredoxin-like protein YLS8	Chr12	30671648	30673749	+	2102	938	624	2	207	23.952	6.5	8.975	-0.271	1	PF02966 (1);		AT5G08290.1	69	1e-103	99
		Gorai.011G179300	Dispersed	Thioredoxin-like protein YLS8	Chr11	42183836	42184145	-	310	267	267	2	88	10.193	-0.5	5.839	-0.116	1	PF02966 (1);		AT5G08290.1	100	2e-44	72
		Gorai.013G069500	WGD/segmental	Thioredoxin-like protein YLS8	Chr13	8035509	8038325	-	2817	1501	354	4	117	13.454	0	6.513	-0.187	1	PF02966 (1);		AT5G08290.1	100	2e-74	78
		Gorai.011G216600	Tandem	Thioredoxin-like protein CITRX, chloroplastic	Chr11	52146094	52149911	+	3818	913	519	4	172	19.773	-1	6.116	-0.151	1	PF00085 (1);		AT3G06730.1	100	1e-87	69
		Gorai.013G132000	Dispersed	Thioredoxin F2, chloroplastic	Chr13	34500434	34502785	-	2352	1200	570	3	189	20.468	9.5	9.859	-0.102	1	PF00085 (1);		AT5G16400.1	94	1e-71	64
		Gorai.005G237300	WGD/segmental	Thioredoxin M3, chloroplastic	Chr05	61893154	61895584	-	2431	1504	519	2	172	19.033	4	8.463	0.015	1	PF00085 (1);		AT2G15570.2	62	7e-52	69
		Gorai.008G024500	WGD/segmental	Thioredoxin M3, chloroplastic	Chr08	2824889	2827234	-	2346	1038	510	2	169	18.634	2	8.043	0.099	1	PF00085 (1);		AT2G15570.2	63	6e-60	78
		Gorai.012G129200	Dispersed	Thioredoxin M-type, chloroplastic	Chr12	29740050	29742133	+	2084	1006	573	2	190	20.811	4	8.623	0.016	1	PF00085 (1);		AT4G03520.1	78	1e-62	59
		Gorai.009G390500	Proximal	Thioredoxin M4, chloroplastic	Chr09	52965733	52968477	+	2745	838	543	3	180	19.608	4.5	8.397	0.147	1	PF00085 (1);		AT3G15360.1	87	2e-61	59
		Gorai.013G168000	Dispersed	Thioredoxin M4, chloroplastic	Chr13	45282052	45283867	-	1816	888	525	3	174	19.276	6.5	9.093	-0.047	1	PF00085 (1);		AT3G15360.1	88	9e-64	61
		Gorai.009G251900	WGD/segmental	Thioredoxin M-type, chloroplastic	Chr09	20529218	20530703	+	1486	1048	546	2	181	20.07	2.5	7.682	-0.059	1	PF00085 (1);		AT4G03520.1	70	4e-48	50
		Gorai.013G106400	WGD/segmental	Thioredoxin M-type, chloroplastic	Chr13	22719186	22719880	-	695	608	489	2	162	18.644	11.5	9.58	-0.173	1	PF00085 (1);		AT4G03520.1	57	9e-32	55
		Gorai.005G083300	WGD/segmental	Thioredoxin M-type, chloroplastic	Chr05	10278342	10279415	-	1074	870	534	2	177	19.57	6.5	8.485	-0.037	1	PF00085 (1);		AT3G15360.1	80	6e-46	47
		Gorai.009G211800	Dispersed	Thioredoxin-like 4, chloroplastic	Chr09	16396598	16398898	+	2301	1148	645	4	214	24.417	-3	5.984	-0.391	1	PF00085 (1);		AT1G07700.3	87	3e-80	66
		Gorai.005G169900	Dispersed	Thioredoxin O1, mitochondrial	Chr05	49669955	49673564	-	3610	1359	666	6	221	24.843	2	8.436	-0.47	1	PF00085 (1);		AT2G35010.1	50	2e-40	56
		Gorai.009G311900	Dispersed	Thioredoxin-like 3-2, chloroplastic	Chr09	29112051	29116384	+	4334	1095	612	5	203	22.896	1.5	7.22	-0.1	1	PF00085 (1);		AT5G04260.1	79	3e-70	64
		Gorai.012G099700	Dispersed	Thioredoxin-like 3-1, chloroplastic	Chr12	21188574	21190461	-	1888	1022	630	4	209	24.388	13.5	10.19	-0.564	1	PF00085 (1);		AT5G06690.2	72	3e-51	54
		Gorai.007G003400	Dispersed	TPR repeat-containing thioredoxin TDX	Chr07	286005	289488	+	3484	1674	1323	10	440	49.511	5.5	8.183	-0.622	2	PF13414 (1); PF00085 (1);		AT3G17880.1	87	0	68
		Gorai.004G201800	WGD/segmental	TPR repeat-containing thioredoxin TDX	Chr04	52977794	52981790	+	3997	1676	1155	11	384	42.049	-10	4.947	-0.739	1	PF13414 (1);		AT3G17880.1	72	2e-104	58
		Gorai.005G110000	WGD/segmental	Thioredoxin H-type	Chr05	20078644	20079936	-	1293	814	348	3	115	12.783	2	8.066	0.2	1	PF00085 (1);		AT3G51030.1	97	1e-49	63
		Gorai.002G126200	WGD/segmental	Thioredoxin H-type	Chr02	19149676	19151215	+	1540	1142	360	3	119	13.273	-3	4.843	0.057	1	PF00085 (1);		AT3G51030.1	92	1e-59	75
		Gorai.011G100200	WGD/segmental	Thioredoxin H-type	Chr11	11166536	11169009	+	2474	843	369	3	122	13.557	-2	5.209	-0.101	1	PF00085 (1);		AT3G51030.1	93	1e-64	75
		Gorai.007G198800	WGD/segmental	Thioredoxin H-type	Chr07	20210796	20212570	+	1775	1064	369	3	122	13.583	-1	5.767	-0.186	1	PF00085 (1);		AT3G51030.1	93	4e-60	72
		Gorai.009G175900	WGD/segmental	Thioredoxin-like protein CXXS1	Chr09	13619491	13621120	+	1630	873	378	3	125	14.119	-2	5.169	-0.071	1	PF00085 (1);		AT1G11530.1	90	3e-56	69
		Gorai.002G081800	WGD/segmental	Thioredoxin-like protein CXXS1	Chr02	10351766	10353456	+	1691	639	384	3	127	14.419	1	7.347	-0.083	1	PF00085 (1);		AT1G11530.1	92	2e-50	61
		Gorai.010G219600	Dispersed	Thioredoxin H-type	Chr10	58839513	58843590	-	4078	973	435	4	144	16.236	0	6.518	-0.185	1	PF00085 (1);		AT3G08710.1	96	3e-47	53
		Gorai.006G235800	Dispersed	Thioredoxin H-type	Chr06	48363299	48366210	-	2912	937	402	5	133	14.861	-3	4.921	-0.253	1	PF00085 (1);		AT3G08710.1	99	1e-68	74
		Gorai.011G125000	Dispersed	Thioredoxin H-type	Chr11	17710928	17716342	-	5415	985	516	5	171	19.222	3.5	7.899	-0.532	1	PF00085 (1);		AT3G08710.1	78	2e-69	75
		Gorai.009G346700	Dispersed	Thioredoxin H2	Chr09	42244985	42245796	-	812	640	489	3	162	18.703	12	10.257	-0.396	1	PF00085 (1);		AT5G39950.1	70	5e-41	52
		Gorai.006G023700	WGD/segmental	Thioredoxin H2	Chr06	6190208	6191333	-	1126	850	405	3	134	14.744	-2	5.243	-0.283	1	PF00085 (1);		AT5G39950.1	98	2e-59	66
		Gorai.012G055800	WGD/segmental	Thioredoxin H2	Chr12	7514870	7516503	-	1634	843	405	3	134	14.885	-1.5	5.678	-0.283	1	PF00085 (1);		AT5G39950.1	96	2e-55	59
		Gorai.012G134800	Dispersed	Thioredoxin X, chloroplastic	Chr12	30703470	30704645	-	1176	1033	552	2	183	20.164	2	8.045	-0.154	1	PF00085 (1);		AT1G50320.1	100	9e-67	59
		Gorai.009G254900	Dispersed	Thioredoxin Y1, chloroplastic	Chr09	20954083	20956253	+	2171	1140	504	5	167	18.681	6	9.63	-0.164	1	PF00085 (1);		AT1G76760.1	96	7e-70	65
		Gorai.005G159700	Proximal	Thioredoxin-like protein HCF164, chloroplastic	Chr05	45861691	45863936	-	2246	1206	783	4	260	28.747	-5	5.031	-0.432	1	PF00085 (1);		AT4G37200.1	85	4e-108	69
		Gorai.005G159300	Proximal	Thioredoxin-like protein HCF164, chloroplastic	Chr05	45836016	45837711	+	1696	456	456	5	151	17.026	4	7.903	-0.383	1	PF00085 (1);		AT4G37200.1	81	7e-62	64
		Gorai.004G069600	Dispersed	Thioredoxin-like 2, chloroplastic	Chr04	7321663	7324711	+	3049	1507	708	4	235	25.948	5	8.06	-0.189	1	PF00085 (1);		AT4G26160.1	62	3e-80	73
		Gorai.010G082200	WGD/segmental	Thioredoxin-like 2, chloroplastic	Chr10	12059596	12063259	-	3664	1303	714	4	237	26.043	9	8.897	-0.252	1	PF00085 (1);		AT4G26160.1	60	7e-78	73
		Gorai.009G031200	WGD/segmental	Thioredoxin-like 2, chloroplastic	Chr09	2348589	2350376	-	1788	1202	606	4	201	22.552	10	8.881	-0.152	1	PF00085 (1);		AT4G26160.1	71	6e-75	71
		Gorai.008G194300	Dispersed	Thioredoxin-like 1-2, chloroplastic	Chr08	47864321	47866173	-	1853	1568	1053	4	350	38.786	14.5	8.871	-0.309	1	PF00085 (1);		AT5G61440.1	57	8e-76	58
		Gorai.013G117900	WGD/segmental	Thioredoxin-like 1-1, chloroplastic	Chr13	29097150	29099372	-	2223	1566	864	4	287	32.179	17.5	9.745	-0.37	1	PF00085 (1);		AT1G08570.1	100	7e-116	61
		Gorai.013G192000	WGD/segmental	Thioredoxin-like 1-1, chloroplastic	Chr13	49287073	49289821	+	2749	1554	855	4	284	32.164	25.5	10.272	-0.407	1	PF00085 (1);		AT1G08570.1	99	4e-100	56
		Gorai.007G267200	WGD/segmental	Thioredoxin-like 1-1, chloroplastic	Chr07	44791553	44794089	-	2537	1833	840	4	279	31.302	17.5	9.853	-0.41	1	PF00085 (1);		AT1G08570.1	100	2e-111	61
		Gorai.006G177900	Dispersed	Thioredoxin-like protein AAED1, chloroplastic	Chr06	43521980	43524250	+	2271	980	747	9	248	27.418	6.5	8.471	-0.433	1	PF13911 (1);		AT2G37240.1	85	8e-112	73
		Gorai.011G108500	Dispersed	Thioredoxin-like protein AAED1, chloroplastic	Chr11	12793195	12795820	+	2626	1295	777	7	258	28.346	9	9.014	-0.121	1	PF13911 (1);		AT5G65840.1	78	5e-109	72
		Gorai.008G085700	Dispersed	Thioredoxin-like protein AAED1, chloroplastic	Chr08	18655661	18657386	+	1726	1167	777	7	258	28.071	1.5	7.271	-0.048	1	PF13911 (1);		AT5G65840.1	74	6e-104	71
		Gorai.010G042300	Dispersed	TPR repeat-containing thioredoxin TTL1	Chr10	3982131	3985547	+	3417	2923	2094	6	697	77.303	37.5	9.8	-0.508	5	PF13414 (2); PF07719 (2); PF00085 (1);		AT5G65160.1	65	4e-148	49
		Gorai.007G240100	WGD/segmental	Inactive TPR repeat-containing thioredoxin TTL3	Chr07	33052621	33054665	+	2045	1737	1737	4	578	63.864	23.5	9.393	-0.757	3	PF13414 (2); PF00515 (1);		AT5G65160.1	80	0	64
		Gorai.007G061400	WGD/segmental	TPR repeat-containing thioredoxin TTL4	Chr07	4321071	4324171	+	3101	2322	1617	5	538	60.376	25	9.607	-0.707	4	PF13414 (2); PF07719 (2);		AT5G65160.1	82	6e-180	58
		Gorai.011G112900	WGD/segmental	Inactive TPR repeat-containing thioredoxin TTL3	Chr11	14162639	14166334	-	3696	2318	1767	5	588	65.184	27.5	9.746	-0.686	4	PF13414 (2); PF07719 (1); PF13428 (1);		AT5G65160.1	99	0	54
		Gorai.006G001700	Dispersed	Inactive TPR repeat-containing thioredoxin TTL3	Chr06	493586	497146	-	3561	2618	2016	7	671	72.952	19.5	8.933	-0.346	4	PF13414 (2); PF07719 (1); PF00085 (1);		AT2G42580.1	96	0	59
		Gorai.004G272300	Dispersed	TPR repeat-containing thioredoxin TTL1	Chr04	60689420	60694332	-	4913	2634	2034	6	677	74.821	22.5	9.076	-0.454	3	PF13414 (2); PF07719 (1);		AT1G53300.1	72	0	66
	G. hirsutum	Gh_A01G0392	WGD/segmental	TPR repeat-containing thioredoxin TTL1	A01	6180321	6183586	-	3266	2067	2067	7	688	75.387	18.5	8.8	-0.418	3	PF13414 (2); PF00085 (1);		AT1G53300.1	81	0	69
		Gh_D01G2342	WGD/segmental	TPR repeat-containing thioredoxin TTL1	scaffold3717_D01	184882	188180	-	3299	2109	2109	7	702	76.943	18.5	8.794	-0.463	3	PF13414 (2); PF00085 (1);		AT1G53300.1	98	0	64
		Gh_A09G0941	WGD/segmental	Thioredoxin-like protein Clot	A09	58776951	58777550	+	600	405	405	2	134	15.234	1	6.944	-0.4	1	PF06110 (1);		AT5G42850.1	90	6e-49	61
		Gh_D09G0972	WGD/segmental	Thioredoxin-like protein Clot	D09	35374532	35375142	+	611	405	405	2	134	15.259	1	6.931	-0.381	1	PF06110 (1);		AT5G42850.1	90	8e-50	62
		Gh_A04G0602	WGD/segmental	Thioredoxin-like 3-3	A04	40911633	40912375	+	743	396	396	3	131	14.774	0	6.503	-0.616	1	PF00085 (1);		AT3G53220.1	94	7e-61	70
		Gh_D04G1063	WGD/segmental	Thioredoxin-like 3-3	D04	34666878	34667624	+	747	396	396	3	131	14.788	0	6.503	-0.616	1	PF00085 (1);		AT3G53220.1	94	6e-61	70
		Gh_A09G1367	WGD/segmental	Thioredoxin-like 3-3	A09	66643367	66647761	+	4395	510	510	5	169	19.803	0.5	6.62	-0.838	1	PF00085 (1);		AT3G53220.1	48	6e-50	88
		Gh_Sca212745G01	Dispersed	Thioredoxin-like 3-3	scaffold212745	54	233	+	180	180	180	1	59	7.089	-4	4.675	-0.769	NA	-		AT3G53220.1	100	2e-34	86
		Gh_A05G1567	WGD/segmental	Thioredoxin-like protein CDSP32, chloroplastic	A05	16069013	16069912	+	900	900	900	1	299	33.702	1.5	6.733	-0.294	2	PF00085 (2);		AT1G76080.1	100	2e-142	70
		Gh_D05G1745	WGD/segmental	Thioredoxin-like protein CDSP32, chloroplastic	D05	15776103	15777005	+	903	903	903	1	300	33.752	0.5	6.584	-0.294	2	PF00085 (2);		AT1G76080.1	100	1e-141	69
		Gh_A01G0370	WGD/segmental	Thioredoxin-like protein 4B	A01	5501132	5502655	+	1524	456	456	3	151	17.207	-0.5	6.349	0.008	1	PF02966 (1);		AT3G24730.1	100	1e-91	84
		Gh_D01G2331	WGD/segmental	Thioredoxin-like protein 4B	scaffold3715_D01	118913	120514	-	1602	456	456	3	151	17.238	0	6.514	0.03	1	PF02966 (1);		AT3G24730.1	100	1e-92	84
		Gh_A04G0936	WGD/segmental	Thioredoxin-like protein YLS8	A04	58377334	58379105	+	1772	624	624	2	207	23.858	4	8.21	-0.244	1	PF02966 (1);		AT5G08290.1	69	1e-103	99
		Gh_D04G1453	WGD/segmental	Thioredoxin-like protein YLS8	D04	46235588	46237358	+	1771	624	624	2	207	23.924	6.5	8.975	-0.238	1	PF02966 (1);		AT5G08290.1	69	2e-103	99
		Gh_A01G2026	WGD/segmental	Thioredoxin-like protein YLS8	scaffold31_A01	99712	102112	-	2401	378	378	2	125	14.28	-4.5	4.904	-0.125	1	PF02966 (1);		AT5G08290.1	78	1e-65	92
		Gh_D13G0608	WGD/segmental	Thioredoxin-like protein YLS8	D13	8466942	8472142	-	5201	318	318	4	105	12.123	5	9.47	-0.33	1	PF02966 (1);		AT5G08290.1	90	1e-59	78
		Gh_D01G0144	WGD/segmental	Thioredoxin-like protein YLS8	D01	1049049	1051718	-	2670	465	465	3	154	18.117	-2	5.669	-0.315	1	PF02966 (1);		AT5G08290.1	92	2e-100	94
		Gh_D11G2239	Dispersed	Thioredoxin-like protein YLS8	D11	38838359	38840531	+	2173	414	414	4	137	15.856	11	10.165	-0.21	1	PF02966 (1);		AT5G08290.1	53	8e-37	84
		Gh_A03G1039	Dispersed	Thioredoxin-like protein HCF164, chloroplastic	A03	72635738	72636403	-	666	414	414	3	137	14.849	0	6.698	-0.247	NA	-		AT4G37200.1	70	6e-16	44
		Gh_A10G1673	WGD/segmental	Thioredoxin-like protein CITRX, chloroplastic	A10	89184766	89187999	+	3234	519	519	4	172	19.833	-0.5	6.266	-0.151	1	PF00085 (1);		AT3G06730.1	100	6e-88	69
		Gh_D10G1930	Tandem	Thioredoxin-like protein CITRX, chloroplastic	D10	53955873	53959220	+	3348	519	519	4	172	19.773	-1	6.116	-0.151	1	PF00085 (1);		AT3G06730.1	100	1e-87	69
		Gh_A13G0947	WGD/segmental	Thioredoxin F2, chloroplastic	A13	50572849	50574617	-	1769	570	570	3	189	20.468	9.5	9.859	-0.102	1	PF00085 (1);		AT5G16400.1	94	1e-71	64
		Gh_D13G1199	WGD/segmental	Thioredoxin F2, chloroplastic	D13	35731053	35732778	-	1726	570	570	3	189	20.467	10.5	10.006	-0.102	1	PF00085 (1);		AT5G16400.1	94	4e-71	63
		Gh_A03G1663	WGD/segmental	Thioredoxin M3, chloroplastic	A03	97801284	97802734	-	1451	519	519	2	172	18.974	3.5	8.082	0.02	1	PF00085 (1);		AT2G15570.2	62	3e-53	70
		Gh_D02G2078	WGD/segmental	Thioredoxin M3, chloroplastic	D02	64950815	64952258	-	1444	519	519	2	172	18.939	5.5	8.822	0.027	1	PF00085 (1);		AT2G15570.2	62	3e-53	70
		Gh_A12G0210	WGD/segmental	Thioredoxin M3, chloroplastic	A12	3143153	3144981	-	1829	510	510	2	169	18.697	3	8.463	-0.012	1	PF00085 (1);		AT2G15570.2	63	5e-59	76
		Gh_D12G0212	WGD/segmental	Thioredoxin M3, chloroplastic	D12	2810687	2812502	-	1816	510	510	2	169	18.68	2	8.043	0.069	1	PF00085 (1);		AT2G15570.2	66	2e-59	77
		Gh_A04G0896	WGD/segmental	Thioredoxin M-type, chloroplastic	A04	57252559	57254168	+	1610	552	552	2	183	20.026	4.5	8.92	-0.072	1	PF00085 (1);		AT4G03520.1	81	5e-64	62
		Gh_D04G1401	WGD/segmental	Thioredoxin M-type, chloroplastic	D04	45339472	45341113	+	1642	573	573	2	190	20.787	3.5	8.474	-0.01	1	PF00085 (1);		AT4G03520.1	78	1e-62	60
		Gh_A04G0254	WGD/segmental	Thioredoxin M4, chloroplastic	A04	5444173	5446409	-	2237	543	543	2	180	19.679	5.5	8.683	0.106	1	PF00085 (1);		AT3G15360.1	87	7e-62	59
		Gh_D05G3451	WGD/segmental	Thioredoxin M4, chloroplastic	D05	56352666	56354805	+	2140	453	453	2	150	16.473	2.5	8.207	0.126	1	PF00085 (1);		AT3G15360.1	73	2e-35	54
		Gh_A13G1237	WGD/segmental	Thioredoxin M4, chloroplastic	A13	66065445	66066513	-	1069	525	525	2	174	19.331	10.5	10.063	-0.057	1	PF00085 (1);		AT3G15360.1	88	2e-65	63
		Gh_D13G1537	WGD/segmental	Thioredoxin M4, chloroplastic	D13	47427898	47428938	-	1041	438	438	3	145	16.556	4.5	8.755	0.006	1	PF00085 (1);		AT3G15360.1	76	7e-53	66
		Gh_A05G2047	WGD/segmental	Thioredoxin M-type, chloroplastic	A05	22371290	22372265	+	976	546	546	2	181	20.032	1.5	7.244	-0.066	1	PF00085 (1);		AT4G03520.1	64	6e-48	55
		Gh_D03G1721	WGD/segmental	Thioredoxin M-type, chloroplastic	scaffold3920_D03	1179767	1180342	-	576	489	489	2	162	18.608	10.5	9.369	-0.155	1	PF00085 (1);		AT4G03520.1	57	1e-31	55
		Gh_D05G2291	WGD/segmental	Thioredoxin M-type, chloroplastic	D05	22219391	22220374	+	984	546	546	2	181	20.074	2.5	7.682	-0.055	1	PF00085 (1);		AT4G03520.1	70	4e-48	50
		Gh_A02G0699	WGD/segmental	Thioredoxin M-type, chloroplastic	A02	11849135	11849879	-	745	534	534	2	177	19.543	7.5	8.679	-0.031	1	PF00085 (1);		AT3G15360.1	80	5e-46	47
		Gh_D02G0744	WGD/segmental	Thioredoxin M-type, chloroplastic	D02	11176312	11177050	-	739	534	534	2	177	19.527	7.5	8.679	-0.016	1	PF00085 (1);		AT3G15360.1	80	6e-46	47
		Gh_A05G1744	WGD/segmental	Thioredoxin-like 4, chloroplastic	A05	18364116	18365199	+	1084	513	513	3	170	19.139	-10.5	4.514	-0.328	1	PF00085 (1);		AT1G07700.3	86	2e-80	78
		Gh_D05G1938	WGD/segmental	Thioredoxin-like 4, chloroplastic	D05	17800353	17801568	+	1216	645	645	3	214	24.431	-3	5.984	-0.381	1	PF00085 (1);		AT1G07700.3	87	1e-80	66
		Gh_A03G1112	WGD/segmental	Thioredoxin O1, mitochondrial	A03	80681586	80684502	-	2917	660	660	6	219	24.739	-2	5.192	-0.549	1	PF00085 (1);		AT2G35010.1	89	1e-41	43
		Gh_D02G1538	WGD/segmental	Thioredoxin O1, mitochondrial	D02	53283328	53286227	-	2900	666	666	6	221	24.926	0.5	7.191	-0.493	1	PF00085 (1);		AT2G35010.1	89	1e-41	44
		Gh_A05G2534	WGD/segmental	Thioredoxin-like 3-2, chloroplastic	A05	35131420	35135346	+	3927	600	600	4	199	22.503	1	7.123	-0.089	1	PF00085 (1);		AT5G04260.1	78	4e-63	59
		Gh_D05G2811	WGD/segmental	Thioredoxin-like 3-2, chloroplastic	D05	31392379	31396247	+	3869	597	597	4	198	22.359	1.5	7.273	-0.058	1	PF00085 (1);		AT5G04260.1	96	6e-62	54
		Gh_A04G1345	Dispersed	Thioredoxin-like 3-1, chloroplastic	scaffold831_A04	669140	670219	-	1080	549	549	4	182	21.53	11	10.106	-0.528	1	PF00085 (1);		AT5G06690.2	83	4e-49	53
		Gh_D04G0855	Dispersed	Thioredoxin-like 3-1, chloroplastic	D04	22682712	22684095	-	1384	567	567	5	188	22.186	11.5	10.089	-0.56	1	PF00085 (1);		AT5G06690.2	80	2e-52	55
		Gh_A11G0026	WGD/segmental	TPR repeat-containing thioredoxin TDX	A11	290341	293279	+	2939	1149	1149	10	382	42.636	-3	5.798	-0.563	2	PF13414 (1); PF00085 (1);		AT3G17880.1	100	0	68
		Gh_D11G0024	WGD/segmental	TPR repeat-containing thioredoxin TDX	D11	243466	246423	+	2958	1149	1149	10	382	42.456	-4.5	5.404	-0.551	2	PF13414 (1); PF00085 (1);		AT3G17880.1	100	0	68
		Gh_A03G0712	WGD/segmental	Thioredoxin H-type	A03	27732820	27733630	-	811	348	348	3	115	12.754	0	6.502	0.23	1	PF00085 (1);		AT3G51030.1	97	6e-49	62
		Gh_D02G0962	WGD/segmental	Thioredoxin H-type	D02	22158320	22159130	-	811	348	348	3	115	12.827	2	8.066	0.175	1	PF00085 (1);		AT3G51030.1	97	4e-49	62
		Gh_A05G1627	WGD/segmental	Thioredoxin H-type	A05	16835180	16835553	+	374	264	264	2	87	9.977	3	9.606	0.208	1	PF00085 (1);		AT3G51030.1	91	1e-32	66
		Gh_A01G0925	WGD/segmental	Thioredoxin H-type	A01	23610421	23611178	+	758	360	360	3	119	13.15	-1	5.694	0.132	1	PF00085 (1);		AT3G51030.1	92	7e-60	76
		Gh_D01G0969	WGD/segmental	Thioredoxin H-type	D01	17173598	17174355	+	758	360	360	3	119	13.273	-3	4.843	0.057	1	PF00085 (1);		AT3G51030.1	92	1e-59	75
		Gh_A10G0871	WGD/segmental	Thioredoxin H-type	A10	18887952	18889452	-	1501	366	366	3	121	13.441	-4	4.755	-0.101	1	PF00085 (1);		AT3G51030.1	94	2e-66	79
		Gh_D10G0883	WGD/segmental	Thioredoxin H-type	D10	11224777	11226352	+	1576	366	366	3	121	13.415	-1	5.751	-0.05	1	PF00085 (1);		AT3G51030.1	93	1e-63	76
		Gh_A11G1655	WGD/segmental	Thioredoxin H-type	A11	25192076	25193226	+	1151	363	363	3	120	13.264	-1	5.767	-0.099	1	PF00085 (1);		AT3G51030.1	95	1e-60	72
		Gh_D11G1815	WGD/segmental	Thioredoxin H-type	D11	20764529	20765597	+	1069	363	363	3	120	13.277	-1	5.767	-0.118	1	PF00085 (1);		AT3G51030.1	95	5e-62	74
		Gh_A05G1428	WGD/segmental	Thioredoxin-like protein CXXS1	A05	14808033	14809162	+	1130	378	378	3	125	14.154	-4	4.701	-0.126	1	PF00085 (1);		AT1G11530.1	90	2e-56	70
		Gh_D05G1600	WGD/segmental	Thioredoxin-like protein CXXS1	D05	14470579	14471705	+	1127	378	378	3	125	14.133	-2	5.169	-0.069	1	PF00085 (1);		AT1G11530.1	90	2e-56	70
		Gh_A01G0565	WGD/segmental	Thioredoxin-like protein CXXS1	A01	9961449	9962896	+	1448	387	387	3	128	14.553	1.5	8.218	-0.103	1	PF00085 (1);		AT1G11530.1	91	6e-51	60
		Gh_D01G0574	WGD/segmental	Thioredoxin-like protein CXXS1	D01	7894639	7896384	+	1746	231	231	3	76	8.625	5.5	10.27	-0.276	1	PF00085 (1);		AT1G11530.1	67	6e-14	55
		Gh_D06G1943	WGD/segmental	Thioredoxin H-type	D06	60596875	60600359	-	3485	435	435	4	144	16.236	0	6.518	-0.185	1	PF00085 (1);		AT3G08710.1	96	3e-47	53
		Gh_A09G2271	WGD/segmental	Thioredoxin H-type	scaffold2280_A09	51411	53152	+	1742	471	471	4	156	17.439	-1	5.783	-0.128	1	PF00085 (1);		AT3G08710.1	81	9e-66	74
		Gh_D09G2058	WGD/segmental	Thioredoxin H-type	D09	47928441	47930139	-	1699	423	423	4	140	15.656	-4	4.746	-0.283	1	PF00085 (1);		AT3G08710.1	99	5e-66	70
		Gh_A10G1358	WGD/segmental	Thioredoxin H-type	A10	72215428	72220402	+	4975	516	516	5	171	19.312	2.5	7.506	-0.533	1	PF00085 (1);		AT3G08710.1	78	4e-71	75
		Gh_D10G1112	WGD/segmental	Thioredoxin H-type	D10	17794688	17799652	-	4965	516	516	5	171	19.222	3.5	7.899	-0.532	1	PF00085 (1);		AT3G08710.1	78	2e-69	75
		Gh_A05G2809	WGD/segmental	Thioredoxin H2	A05	59197732	59198267	-	536	357	357	3	118	13.497	1.5	8.04	-0.286	1	PF00085 (1);		AT5G39950.1	97	7e-42	53
		Gh_D05G3114	WGD/segmental	Thioredoxin H2	D05	45142477	45143137	-	661	489	489	3	162	18.747	11	10.16	-0.429	1	PF00085 (1);		AT5G39950.1	70	3e-41	52
		Gh_A09G0209	WGD/segmental	Thioredoxin H2	A09	6250877	6251568	-	692	405	405	3	134	14.791	-3	4.951	-0.296	1	PF00085 (1);		AT5G39950.1	100	5e-59	64
		Gh_D09G0198	WGD/segmental	Thioredoxin H2	D09	6265013	6265687	-	675	405	405	3	134	14.814	-3	4.987	-0.299	1	PF00085 (1);		AT5G39950.1	98	7e-58	64
		Gh_A05G3165	WGD/segmental	Thioredoxin H2	A05	82322873	82323790	+	918	270	270	2	89	9.809	-0.5	5.848	0.009	1	PF00085 (1);		AT5G39950.1	94	3e-39	67
		Gh_D04G0461	WGD/segmental	Thioredoxin H2	D04	7485719	7486866	-	1148	405	405	3	134	14.885	-1.5	5.678	-0.283	1	PF00085 (1);		AT5G39950.1	96	2e-55	59
		Gh_A04G0941	WGD/segmental	Thioredoxin X, chloroplastic	A04	58419687	58420381	-	695	552	552	2	183	20.15	2	8.044	-0.154	1	PF00085 (1);		AT1G50320.1	100	1e-66	59
		Gh_D04G1456	WGD/segmental	Thioredoxin X, chloroplastic	D04	46263920	46264614	-	695	552	552	2	183	20.223	3	8.465	-0.17	1	PF00085 (1);		AT1G50320.1	100	3e-66	59
		Gh_A05G3692	WGD/segmental	Thioredoxin Y1, chloroplastic	scaffold1204_A05	44204	45736	+	1533	504	504	4	167	18.667	6	9.63	-0.166	1	PF00085 (1);		AT1G76760.1	96	1e-69	64
		Gh_D05G2311	WGD/segmental	Thioredoxin Y1, chloroplastic	D05	22704180	22705603	+	1424	504	504	4	167	18.681	6	9.63	-0.164	1	PF00085 (1);		AT1G76760.1	96	7e-70	65
		Gh_D02G1432	Dispersed	Thioredoxin-like protein HCF164, chloroplastic	D02	49279843	49281665	-	1823	783	783	4	260	28.791	-5	5.031	-0.431	1	PF00085 (1);		AT4G37200.1	85	2e-106	68
		Gh_A03G1037	Dispersed	Thioredoxin-like protein HCF164, chloroplastic	A03	72518187	72520997	+	2811	618	618	5	205	23.255	-5.5	4.973	-0.149	1	PF00085 (1);		AT4G37200.1	75	4e-67	66
		Gh_A08G0527	WGD/segmental	Thioredoxin-like 2, chloroplastic	A08	8037017	8039302	+	2286	708	708	4	235	25.987	6.5	8.374	-0.217	1	PF00085 (1);		AT4G26160.1	62	3e-80	73
		Gh_D08G0621	WGD/segmental	Thioredoxin-like 2, chloroplastic	D08	7562439	7564695	+	2257	708	708	4	235	25.929	6	8.284	-0.181	1	PF00085 (1);		AT4G26160.1	62	1e-79	73
		Gh_A06G0633	WGD/segmental	Thioredoxin-like 2, chloroplastic	A06	16254910	16257988	-	3079	717	717	4	238	26.315	11.5	9.354	-0.267	1	PF00085 (1);		AT4G26160.1	60	6e-77	73
		Gh_D06G0720	WGD/segmental	Thioredoxin-like 2, chloroplastic	D06	12445573	12448647	-	3075	714	714	4	237	26.07	9	8.897	-0.263	1	PF00085 (1);		AT4G26160.1	60	7e-78	73
		Gh_A05G0217	WGD/segmental	Thioredoxin-like 2-1, chloroplastic	A05	2364420	2365609	-	1190	606	606	4	201	22.611	10	8.881	-0.175	1	PF00085 (1);		AT4G26160.1	71	5e-75	71
		Gh_D05G0296	WGD/segmental	Thioredoxin-like 2-1, chloroplastic	D05	2570418	2571606	-	1189	603	603	4	200	22.513	10	8.881	-0.171	1	PF00085 (1);		AT4G26160.1	72	4e-75	71
		Gh_D12G1760	Dispersed	Thioredoxin-like 1-2, chloroplastic	D12	50002357	50003473	-	1117	834	834	4	277	30.522	10.5	8.671	-0.258	1	PF00085 (1);		AT5G61440.1	71	5e-77	58
		Gh_Sca006915G01	Dispersed	Thioredoxin-like 1-2, chloroplastic	scaffold6915	8509	9576	+	1068	780	780	4	259	28.721	11.5	8.803	-0.253	1	PF00085 (1);		AT5G61440.1	76	1e-76	58
		Gh_A13G0827	WGD/segmental	Thioredoxin-like 1-1, chloroplastic	A13	39429685	39431204	-	1520	864	864	4	287	32.127	17.5	9.853	-0.367	1	PF00085 (1);		AT1G08570.1	100	2e-115	61
		Gh_D13G1071	WGD/segmental	Thioredoxin-like 1-1, chloroplastic	D13	29731053	29732575	-	1523	864	864	4	287	32.238	18.5	9.857	-0.38	1	PF00085 (1);		AT1G08570.1	100	3e-115	61
		Gh_A13G1441	WGD/segmental	Thioredoxin-like 1-1, chloroplastic	A13	72077065	72079101	+	2037	849	849	4	282	32.047	25	10.239	-0.379	1	PF00085 (1);		AT1G08570.1	99	1e-98	54
		Gh_D13G1757	WGD/segmental	Thioredoxin-like 1-1, chloroplastic	D13	52378929	52380974	-	2046	855	855	4	284	32.144	25	10.216	-0.403	1	PF00085 (1);		AT1G08570.1	99	5e-100	56
		Gh_A11G2160	WGD/segmental	Thioredoxin-like 1-1, chloroplastic	A11	71926477	71928011	-	1535	840	840	4	279	31.157	15.5	9.509	-0.408	1	PF00085 (1);		AT1G08570.1	100	2e-111	61
		Gh_D11G2462	WGD/segmental	Thioredoxin-like 1-1, chloroplastic	D11	50173591	50175134	-	1544	840	840	4	279	31.313	18	9.842	-0.387	1	PF00085 (1);		AT1G08570.1	100	5e-111	61
		Gh_A09G1503	WGD/segmental	Thioredoxin-like protein AAED1, chloroplastic	A09	68192816	68194852	+	2037	753	753	9	250	27.599	8	8.941	-0.373	1	PF13911 (1);		AT2G37240.1	80	2e-110	75
		Gh_D09G1514	WGD/segmental	Thioredoxin-like protein AAED1, chloroplastic	D09	42619128	42621167	+	2040	627	627	8	208	22.892	10	9.402	-0.454	1	PF13911 (1);		AT2G37240.1	69	2e-83	80
		Gh_A10G0803	WGD/segmental	Thioredoxin-like protein AAED1, chloroplastic	A10	16417963	16420109	-	2147	777	777	7	258	28.35	8	8.832	-0.088	1	PF13911 (1);		AT5G65840.1	78	7e-109	71
		Gh_D10G0960	WGD/segmental	Thioredoxin-like protein AAED1, chloroplastic	D10	13002697	13004955	+	2259	570	570	8	189	20.832	4	8.462	NA	1	PF13911 (1);		AT5G65840.1	96	2e-103	76
		Gh_D12G0740	Dispersed	Thioredoxin-like protein AAED1, chloroplastic	D12	18082882	18084494	+	1613	657	657	8	218	23.716	-6.5	4.667	-0.002	1	PF13911 (1);		AT5G65840.1	88	2e-103	71
		Gh_A06G0299	WGD/segmental	TPR repeat-containing thioredoxin TTL1	A06	3854552	3857117	+	2566	2094	2094	6	697	77.27	36	9.72	-0.488	5	PF13414 (2); PF07719 (1); PF13371 (1); PF00085 (1);		AT5G65160.1	84	2e-150	42
		Gh_D06G0320	WGD/segmental	TPR repeat-containing thioredoxin TTL1	D06	3715167	3717754	+	2588	2094	2094	6	697	77.308	36	9.713	-0.509	5	PF13414 (2); PF07719 (2); PF00085 (1);		AT5G65160.1	65	1e-150	50
		Gh_A11G3114	Dispersed	Inactive TPR repeat-containing thioredoxin TTL3	scaffold2775_A11	128299	130349	+	2051	1743	1743	4	580	64.156	24	9.39	-0.758	3	PF13414 (2); PF07719 (1);		AT5G65160.1	99	0	55
		Gh_D11G2195	WGD/segmental	Inactive TPR repeat-containing thioredoxin TTL3	D11	34658057	34660105	+	2049	1746	1746	4	581	63.967	19	8.985	-0.755	3	PF13414 (2); PF00515 (1);		AT5G65160.1	80	0	65
		Gh_A11G0490	WGD/segmental	TPR repeat-containing thioredoxin TTL4	A11	4636958	4639351	+	2394	1620	1620	5	539	60.682	27	9.762	-0.728	4	PF13414 (2); PF07719 (2);		AT5G65160.1	80	2e-174	58
		Gh_D11G0568	WGD/segmental	TPR repeat-containing thioredoxin TTL4	D11	4894833	4897227	+	2395	1617	1617	5	538	60.404	27	9.726	-0.722	4	PF13414 (2); PF07719 (2);		AT5G65160.1	82	1e-178	58
		Gh_A10G2267	Dispersed	Inactive TPR repeat-containing thioredoxin TTL3	scaffold2468_A10	92381	95535	+	3155	1764	1764	5	587	65.135	26.5	9.755	-0.676	4	PF13414 (2); PF07719 (1); PF13428 (1);		AT5G65160.1	99	0	54
		Gh_D10G0998	WGD/segmental	Inactive TPR repeat-containing thioredoxin TTL3	D10	14330424	14333551	-	3128	1761	1761	5	586	64.958	28	9.808	-0.689	4	PF13414 (2); PF07719 (1); PF13428 (1);		AT5G65160.1	99	0	54
		Gh_A09G0014	WGD/segmental	Inactive TPR repeat-containing thioredoxin TTL3	A09	414859	417838	-	2980	2037	2037	7	678	73.816	19.5	8.957	-0.37	4	PF13414 (2); PF07719 (1); PF00085 (1);		AT2G42580.1	100	0	58
		Gh_D09G0012	WGD/segmental	Inactive TPR repeat-containing thioredoxin TTL3	D09	514149	517122	-	2974	2031	2031	7	676	73.487	19	8.933	-0.343	4	PF13414 (2); PF07719 (1); PF00085 (1);		AT2G42580.1	96	0	59
		Gh_A08G2076	WGD/segmental	TPR repeat-containing thioredoxin TTL1	A08	102011139	102015141	-	4003	1872	1872	6	623	68.942	19	8.681	-0.436	3	PF13414 (2); PF07719 (1);		AT1G53300.1	78	0	65
		Gh_D08G2653	WGD/segmental	TPR repeat-containing thioredoxin TTL1	scaffold4247_D08	55887	60089	+	4203	1998	1998	7	665	73.212	13.5	8.263	-0.396	4	PF13414 (2); PF07719 (1); PF00085 (1);		AT1G53300.1	80	0	66
Glutaredoxin (GLR)	G. arboretum	Cotton_A_22704	WGD/segmental	Glutaredoxin-C1	Chr01	99123584	99123964	-	381	381	381	1	126	13.686	2.5	7.87	0.164	1	PF00462 (1);		AT5G14070.1	83	7e-48	69
DHA + 2 GSH → Asc + GSSG		Cotton_A_29540	Tandem	Monothiol glutaredoxin-S2	Chr05	44815569	44815877	+	309	309	309	1	102	11.391	2	7.941	0.214	1	PF00462 (1);		AT5G18600.1	100	7e-56	78
		Cotton_A_33880	Tandem	Monothiol glutaredoxin-S2	Chr01	133670933	133671241	-	309	309	309	1	102	11.315	3.5	8.517	0.115	1	PF00462 (1);		AT5G18600.1	100	6e-55	76
		Cotton_A_33877	Proximal	Monothiol glutaredoxin-S2	Chr01	133900571	133900879	+	309	309	309	1	102	11.126	1.5	7.443	0.286	1	PF00462 (1);		AT5G18600.1	100	2e-55	77
		Cotton_A_33879	Tandem	Monothiol glutaredoxin-S7	Chr01	133731731	133732039	-	309	309	309	1	102	11.116	1.5	7.386	0.36	1	PF00462 (1);		AT4G15670.1	100	1e-52	74
		Cotton_A_23651	Tandem	Monothiol glutaredoxin-S1	Chr06	32283354	32283662	+	309	309	309	1	102	11.151	1.5	8.056	0.274	1	PF00462 (1);		AT1G03020.1	100	1e-51	69
		Cotton_A_08285	WGD/segmental	Monothiol glutaredoxin-S6	Chr04	25162479	25162787	-	309	309	309	1	102	11.189	1.5	8.054	0.204	1	PF00462 (1);		AT3G62930.1	100	5e-53	72
		Cotton_A_13928	WGD/segmental	Monothiol glutaredoxin-S6	Chr12	98379109	98379417	-	309	309	309	1	102	11.318	3.5	8.904	0.153	1	PF00462 (1);		AT3G62930.1	100	7e-52	70
		Cotton_A_34669	Dispersed	Monothiol glutaredoxin-S1	Chr03	39364881	39365189	+	309	309	309	1	102	11.217	3.5	8.915	0.319	1	PF00462 (1);		AT1G03020.1	100	7e-50	67
		Cotton_A_23652	WGD/segmental	Monothiol glutaredoxin-S1	Chr06	32280919	32281227	+	309	309	309	1	102	11.215	1.5	8.055	0.154	1	PF00462 (1);		AT1G03020.1	100	9e-52	68
		Cotton_A_02331	Dispersed	Monothiol glutaredoxin-S14, chloroplastic	Chr11	22222926	22225030	-	2105	507	507	3	168	18.909	4.5	8.595	-0.036	1	PF00462 (1);		AT3G54900.1	68	5e-67	82
		Cotton_A_22338	Dispersed	Bifunctional monothiol glutaredoxin-S16, chloroplastic	Chr10	112705606	112707378	-	1773	894	894	2	297	32.585	1.5	7.34	-0.171	1	PF00462 (1);		AT2G38270.1	99	9e-145	67
		Cotton_A_11804	Dispersed	Monothiol glutaredoxin-S15, mitochondrial	Chr09	94591037	94594175	-	3139	1107	513	6	170	18.704	2	7.668	-0.187	1	PF00462 (1);		AT3G15660.1	98	6e-77	68
		Cotton_A_03894	Dispersed	Monothiol glutaredoxin-S17	Chr09	61624932	61628361	+	3430	2054	1470	3	489	53.455	-13	4.855	-0.28	4	PF00085 (1); PF00462 (3);		AT4G04950.1	99	0	73
		Cotton_A_16145	Dispersed	Glutaredoxin	Chr10	24189165	24194442	+	5278	3075	2067	6	688	77.794	-22	4.892	-0.547	3	PF00462 (1); PF00610 (1); PF04784 (1);		AT4G08550.1	83	0	58
		Cotton_A_35618	Dispersed	Glutaredoxin	Chr02	42825300	42829189	+	3890	2151	2151	6	716	81.408	-7	5.81	-0.397	3	PF00462 (1); PF00610 (1); PF04784 (1);		AT4G08550.1	79	0	56
		Cotton_A_00876	WGD/segmental	Glutaredoxin	Chr13	73435734	73439791	-	4058	1938	1938	6	645	73.781	0	6.52	-0.474	3	PF00462 (1); PF00610 (1); PF04784 (1);		AT3G11920.1	88	0	49
		Cotton_A_22817	WGD/segmental	Glutaredoxin-2	Chr05	47262643	47266202	+	3560	1989	1989	6	662	75.457	4.5	7.059	-0.456	3	PF00462 (1); PF00610 (1); PF04784 (1);		AT3G11920.1	85	0	58
		Cotton_A_26601	Proximal	Glutaredoxin-C1	Chr06	119200724	119202104	+	1381	1260	1260	2	419	46.685	16.5	9.844	-0.023	1	PF00462 (1);		AT3G48200.1	78	3e-109	59
		Cotton_A_26603	Proximal	Glutaredoxin-C1	Chr06	119205740	119206449	+	710	375	375	4	124	13.215	-2	5.021	0.003	1	PF00462 (1);		AT5G63030.1	95	4e-53	62
		Cotton_A_28983	Dispersed	Glutaredoxin-C2	Chr11	2429678	2431914	+	2237	819	324	4	107	11.369	1	7.346	0.071	1	PF00462 (1);		AT5G63030.1	99	7e-46	65
		Cotton_A_34680	Dispersed	Glutaredoxin-C4	Chr13	68902678	68905262	+	2585	1464	396	4	131	14.36	2	8.051	0.104	1	PF00462 (1);		AT5G20500.1	94	3e-61	70
		Cotton_A_24192	Dispersed	Glutaredoxin-C3	Chr09	18795875	18797542	+	1668	898	396	4	131	14.254	3	8.713	0.302	1	PF00462 (1);		AT1G77370.1	100	1e-53	65
		Cotton_A_05898	WGD/segmental	Glutaredoxin-C5, chloroplastic	Chr01	141126945	141129733	+	2789	528	528	5	175	19.252	9.5	9.743	-0.257	1	PF00462 (1);		AT4G28730.1	63	7e-56	70
		Cotton_A_02975	WGD/segmental	Glutaredoxin-C5, chloroplastic	Chr09	72866932	72869509	-	2578	342	342	5	114	12.306	-4	4.639	-0.259	1	PF00462 (1);		AT4G28730.1	93	4e-50	67
		Cotton_A_34665	Dispersed	Glutaredoxin-C11	Chr03	39315103	39315411	-	309	309	309	1	102	11.26	3	8.326	0.031	1	PF00462 (1);		AT3G62950.1	100	9e-60	82
		Cotton_A_08284	Dispersed	Glutaredoxin-C11	Chr04	25193300	25193608	+	309	309	309	1	102	11.214	1.5	7.438	0.104	1	PF00462 (1);		AT3G62950.1	100	8e-56	79
		Cotton_A_18002	Dispersed	Monothiol glutaredoxin-S10	Chr11	33432156	33432464	-	309	309	309	1	102	11.204	5	8.998	0.197	1	PF00462 (1);		AT3G21460.1	100	9e-58	77
		Cotton_A_29541	Tandem	Monothiol glutaredoxin-S10	Chr05	44782591	44782899	-	309	309	309	1	102	11.115	4.5	8.991	0.182	1	PF00462 (1);		AT3G21460.1	100	2e-56	77
		Cotton_A_13925	WGD/segmental	Monothiol glutaredoxin-S9	Chr12	98530893	98531198	+	306	306	306	1	101	11.083	2	7.852	0.26	1	PF00462 (1);		AT2G30540.1	98	2e-53	72
		Cotton_A_34664	Dispersed	Monothiol glutaredoxin-S9	Chr03	39312617	39312922	-	306	306	306	1	101	11.091	-1	5.663	0.227	1	PF00462 (1);		AT2G30540.1	98	5e-51	72
		Cotton_A_23656	WGD/segmental	Monothiol glutaredoxin-S9	Chr06	32250395	32251122	-	728	728	306	1	101	10.975	0	6.485	0.232	1	PF00462 (1);		AT2G30540.1	100	5e-50	72
		Cotton_A_08283	WGD/segmental	Monothiol glutaredoxin-S9	Chr04	25196666	25197240	+	575	575	306	1	101	10.965	0.5	6.749	0.256	1	PF00462 (1);		AT2G30540.1	98	2e-52	71
		Cotton_A_09029	WGD/segmental	Glutaredoxin-C6	Chr13	48241100	48241537	+	438	438	438	1	145	15.352	1.5	6.864	0.286	1	PF00462 (1);		AT4G33040.1	86	4e-54	70
		Cotton_A_11881	WGD/segmental	Glutaredoxin-C6	Chr03	22271037	22271843	-	807	807	405	1	134	14.115	-0.5	6.378	0.298	1	PF00462 (1);		AT4G33040.1	90	7e-52	72
		Cotton_A_36880	Dispersed	Glutaredoxin-C6	Chr08	49426607	49426981	-	375	375	375	1	124	13.195	-1.5	6.129	0.358	1	PF00462 (1);		AT4G33040.1	100	5e-49	65
		Cotton_A_14014	WGD/segmental	Glutaredoxin-C6	Chr01	123768751	123769485	+	735	735	468	1	155	16.584	-0.5	6.383	0.089	1	PF00462 (1);		AT4G33040.1	98	6e-58	65
		Cotton_A_26164	WGD/segmental	Glutaredoxin-C1	Chr10	15922162	15922569	+	408	408	408	1	135	14.256	1.5	7.387	0.519	1	PF00462 (1);		AT5G14070.1	75	6e-29	50
		Cotton_A_02916	WGD/segmental	Glutaredoxin-C8	Chr09	73408997	73409609	-	613	474	474	2	157	16.954	2	7.506	0.622	1	PF00462 (1);		AT5G14070.1	69	8e-27	48
		Cotton_A_03931	WGD/segmental	Glutaredoxin-C9	Chr09	61943982	61944434	-	453	453	453	1	150	15.39	-2.5	5.173	0.217	1	PF00462 (1);		AT1G28480.1	95	1e-44	54
		Cotton_A_30221	Dispersed	Glutaredoxin-C9	Chr13	22120405	22120827	+	423	423	423	1	140	15.169	4	8.349	0.079	1	PF00462 (1);		AT1G28480.1	100	2e-43	56
		Cotton_A_11312	WGD/segmental	Glutaredoxin-C9	Chr10	19110867	19111268	-	402	402	402	1	133	14.056	1.5	7.029	0.289	1	PF00462 (1);		AT1G28480.1	81	4e-45	68
		Cotton_A_10028	Dispersed	Putative glutaredoxin-C14	Chr08	20886383	20886724	+	342	342	342	1	113	12.189	3	8.34	0.328	1	PF00462 (1);		AT5G14070.1	94	8e-45	62
		Cotton_A_24935	Dispersed	Glutaredoxin-C1	Chr12	129244250	129244630	+	381	381	381	1	126	13.623	-1	5.676	0.318	1	PF00462 (1);		AT5G14070.1	84	2e-43	63
		Cotton_A_29054	WGD/segmental	Glutaredoxin-C1	Chr12	55396608	55396985	-	378	378	378	1	125	13.537	3.5	8.221	0.202	1	PF00462 (1);		AT5G14070.1	84	1e-47	67
	G. raimondii	Gorai.001G274800	WGD/segmental	Glutaredoxin-C1	Chr01	55220746	55223042	+	2297	879	564	2	187	20.738	8	8.797	0.11	1	PF00462 (1);		AT5G14070.1	56	2e-47	69
		Gorai.005G058600	WGD/segmental	Monothiol glutaredoxin-S2	Chr05	6080968	6081276	+	309	309	309	1	102	11.327	2	7.941	0.248	1	PF00462 (1);		AT5G18600.1	100	8e-57	80
		Gorai.011G187400	Tandem	Monothiol glutaredoxin-S2	Chr11	44674604	44675331	+	728	728	309	1	102	11.276	2.5	8.081	0.156	1	PF00462 (1);		AT5G18600.1	100	6e-57	79
		Gorai.011G187200	WGD/segmental	Monothiol glutaredoxin-S2	Chr11	44589381	44589689	-	309	309	309	1	102	11.126	1.5	7.443	0.286	1	PF00462 (1);		AT5G18600.1	100	2e-55	77
		Gorai.011G187300	Tandem	Monothiol glutaredoxin-S7	Chr11	44662276	44662950	+	675	675	309	1	102	11.166	1	7.289	0.374	1	PF00462 (1);		AT4G15670.1	100	6e-53	75
		Gorai.008G009200	Tandem	Monothiol glutaredoxin-S1	Chr08	1041499	1042122	+	624	624	309	1	102	11.225	0.5	7.183	0.385	1	PF00462 (1);		AT1G03020.1	100	2e-50	69
		Gorai.007G130700	WGD/segmental	Monothiol glutaredoxin-S6	Chr07	10519945	10520641	-	697	309	309	1	102	11.233	1.5	8.054	0.203	1	PF00462 (1);		AT3G62930.1	100	1e-53	72
		Gorai.004G086500	WGD/segmental	Monothiol glutaredoxin-S6	Chr04	11432157	11432540	+	384	384	309	1	102	11.318	3.5	8.904	0.153	1	PF00462 (1);		AT3G62930.1	100	7e-52	70
		Gorai.004G141100	WGD/segmental	Monothiol glutaredoxin-S1	Chr04	39661534	39662412	+	879	879	309	1	102	11.241	1.5	8.05	0.329	1	PF00462 (1);		AT1G03020.1	100	7e-48	66
		Gorai.008G009100	WGD/segmental	Monothiol glutaredoxin-S1	Chr08	1039067	1039766	+	700	700	309	1	102	11.146	0.5	7.184	0.19	1	PF00462 (1);		AT1G03020.1	100	1e-50	67
		Gorai.007G021200	Dispersed	Monothiol glutaredoxin-S14, chloroplastic	Chr07	1540589	1543030	-	2442	861	507	3	168	18.84	4.5	8.595	-0.048	1	PF00462 (1);		AT3G54900.1	68	4e-66	81
		Gorai.006G183400	Dispersed	Bifunctional monothiol glutaredoxin-S16, chloroplastic	Chr06	44083465	44085869	-	2405	1460	894	3	297	32.606	-0.5	6.288	-0.171	1	PF00462 (1);		AT2G38270.1	99	8e-146	67
		Gorai.011G080700	Dispersed	Monothiol glutaredoxin-S15, mitochondrial	Chr11	8085169	8088098	-	2930	931	513	7	170	18.686	2	7.668	-0.163	1	PF00462 (1);		AT3G15660.1	98	2e-77	68
		Gorai.011G027200	Dispersed	Monothiol glutaredoxin-S17	Chr11	1998649	2001992	+	3344	1977	1470	4	489	53.572	-13	4.858	-0.288	4	PF00085 (1); PF00462 (3);		AT4G04950.1	99	0	73
		Gorai.009G241100	WGD/segmental	Glutaredoxin	Chr09	19311149	19316651	-	5503	2633	2067	7	688	77.739	-21.5	4.896	-0.549	3	PF00462 (1); PF00610 (1); PF04784 (1);		AT4G08550.1	83	0	59
		Gorai.002G219700	WGD/segmental	Glutaredoxin	Chr02	57345041	57350744	-	5704	3036	2151	7	716	81.214	-8.5	5.612	-0.392	3	PF00462 (1); PF00610 (1); PF04784 (1);		AT4G08550.1	79	0	56
		Gorai.013G028400	WGD/segmental	Glutaredoxin	Chr13	2104816	2109119	+	4304	2391	2112	6	703	80.291	5	6.95	-0.38	3	PF00462 (1); PF00610 (1); PF04784 (1);		AT3G11920.1	80	0	51
		Gorai.005G151400	WGD/segmental	Glutaredoxin-2	Chr05	42114922	42118919	+	3998	2566	1983	6	660	75.161	5.5	7.201	-0.47	3	PF00462 (1); PF00610 (1); PF04784 (1);		AT3G11920.1	85	0	58
		Gorai.008G296500	Dispersed	Glutaredoxin-C1	Chr08	56939227	56940333	-	1107	766	375	4	124	13.302	-1	5.664	-0.031	1	PF00462 (1);		AT5G63030.1	95	2e-52	61
		Gorai.006G031800	Dispersed	Glutaredoxin	Chr06	8234323	8236906	-	2584	774	339	5	112	12.021	-1	5.655	0.238	1	PF00462 (1);		AT5G63030.1	82	4e-39	64
		Gorai.004G096800	Dispersed	Glutaredoxin-C4	Chr04	15550160	15552355	-	2196	700	396	6	131	14.465	0	6.515	0.089	1	PF00462 (1);		AT5G20500.1	95	6e-60	67
		Gorai.011G099900	Dispersed	Glutaredoxin-C3	Chr11	11143684	11145569	+	1886	632	396	5	131	14.337	4	9.173	0.291	1	PF00462 (1);		AT1G77370.1	100	2e-54	65
		Gorai.001G236100	WGD/segmental	Glutaredoxin-C5, chloroplastic	Chr01	47367877	47372043	-	4167	1907	531	5	176	19.29	9	9.727	-0.254	1	PF00462 (1);		AT4G28730.1	63	2e-54	70
		Gorai.007G151300	WGD/segmental	Glutaredoxin-C5, chloroplastic	Chr07	12966055	12969223	-	3169	966	528	5	175	19.189	6	9.275	-0.314	1	PF00462 (1);		AT4G28730.1	69	3e-51	60
		Gorai.004G140900	WGD/segmental	Glutaredoxin-C11	Chr04	39633289	39633806	-	518	518	309	1	102	11.26	3	8.326	0.031	1	PF00462 (1);		AT3G62950.1	100	9e-60	82
		Gorai.007G130800	WGD/segmental	Glutaredoxin-C11	Chr07	10534966	10535705	+	740	740	309	1	102	11.214	1.5	7.438	0.104	1	PF00462 (1);		AT3G62950.1	100	8e-56	79
		Gorai.006G264700	WGD/segmental	Monothiol glutaredoxin-S10	Chr06	50369337	50369939	+	603	603	309	1	102	11.204	5	8.998	0.197	1	PF00462 (1);		AT3G21460.1	100	9e-58	77
		Gorai.005G058500	WGD/segmental	Monothiol glutaredoxin-S10	Chr05	6060767	6061182	-	416	416	309	1	102	11.129	5.5	9.363	0.178	1	PF00462 (1);		AT3G21460.1	100	3e-56	77
		Gorai.004G086400	WGD/segmental	Monothiol glutaredoxin-S9	Chr04	11329732	11330432	-	701	675	306	2	101	11.019	2	7.852	0.295	1	PF00462 (1);		AT2G30540.1	98	2e-53	72
		Gorai.004G140800	WGD/segmental	Monothiol glutaredoxin-S9	Chr04	39630940	39631245	-	306	306	306	1	101	11.119	-1	5.663	0.226	1	PF00462 (1);		AT2G30540.1	98	7e-52	73
		Gorai.008G008600	WGD/segmental	Glutaredoxin-C13	Chr08	1014195	1014926	-	732	732	306	1	101	11.06	1	7.246	0.195	1	PF00462 (1);		AT2G47880.1	99	5e-50	69
		Gorai.007G130900	WGD/segmental	Monothiol glutaredoxin-S9	Chr07	10538142	10538938	+	797	797	306	1	101	10.939	0.5	6.749	0.29	1	PF00462 (1);		AT2G30540.1	98	3e-51	70
		Gorai.013G220300	WGD/segmental	Glutaredoxin-C6	Chr13	54030501	54031251	-	751	653	450	1	149	15.698	0.5	6.614	0.266	1	PF00462 (1);		AT4G33040.1	93	8e-57	68
		Gorai.004G286800	WGD/segmental	Glutaredoxin-C6	Chr04	61713673	61714959	+	1287	1287	483	1	160	16.823	-1	6.287	0.122	1	PF00462 (1);		AT4G33040.1	98	3e-56	64
		Gorai.010G099100	WGD/segmental	Glutaredoxin-C6	Chr10	17513625	17513999	+	375	375	375	1	124	13.262	-0.5	6.381	0.32	1	PF00462 (1);		AT4G33040.1	100	3e-52	67
		Gorai.009G044100	WGD/segmental	Glutaredoxin-C6	Chr09	3199857	3201165	+	1309	1309	465	1	154	16.497	-0.5	6.383	0.095	1	PF00462 (1);		AT4G33040.1	98	3e-57	65
		Gorai.009G153500	WGD/segmental	Glutaredoxin-C1	Chr09	11709575	11710529	-	955	495	408	1	135	14.256	1.5	7.387	0.519	1	PF00462 (1);		AT5G14070.1	75	6e-29	50
		Gorai.011G046400	WGD/segmental	Glutaredoxin-C8	Chr11	3592283	3592621	+	339	339	339	1	112	11.779	-0.5	6.225	0.539	1	PF00462 (1);		AT5G14070.1	100	1e-27	48
		Gorai.010G257000	WGD/segmental	Glutaredoxin-C9	Chr10	62168047	62168479	-	433	330	330	2	109	12.099	10.5	10.591	-0.07	NA	-		AT1G28480.1	100	4e-15	35
		Gorai.011G030700	WGD/segmental	Glutaredoxin-C9	Chr11	2292442	2293002	-	561	561	453	1	150	15.314	-0.5	6.245	0.211	1	PF00462 (1);		AT1G28480.1	77	4e-45	63
		Gorai.005G198800	WGD/segmental	Glutaredoxin-C9	Chr05	57393977	57395189	+	1213	1213	423	1	140	15.08	2.5	7.508	0.109	1	PF00462 (1);		AT1G28480.1	81	5e-43	64
		Gorai.009G166200	WGD/segmental	Glutaredoxin-C9	Chr09	12766495	12767690	+	1196	1196	432	1	143	15.203	-0.5	6.34	0.192	1	PF00462 (1);		AT1G28480.1	95	4e-47	61
		Gorai.005G195000	WGD/segmental	Putative glutaredoxin-C14	Chr05	56620669	56621046	-	378	378	378	1	125	13.827	2.5	7.946	0.158	1	PF00462 (1);		AT5G14070.1	85	1e-44	62
		Gorai.008G156900	WGD/segmental	Glutaredoxin-C1	Chr08	41852094	41852916	+	823	823	339	1	112	12.009	2	7.947	0.402	1	PF00462 (1);		AT5G14070.1	95	2e-47	65
		Gorai.012G124500	WGD/segmental	Glutaredoxin-C1	Chr12	28773895	28774275	-	381	381	381	1	126	13.68	1	7.245	0.318	1	PF00462 (1);		AT5G14070.1	84	4e-43	62
		Gorai.012G084000	WGD/segmental	Glutaredoxin-C1	Chr12	14120120	14121012	+	893	893	378	1	125	13.551	3.5	8.221	0.205	1	PF00462 (1);		AT5G14070.1	84	9e-48	68
	G. hirsutum	Gh_A07G2134	WGD/segmental	Glutaredoxin-C1	A07	77984224	77984604	+	381	381	381	1	126	13.676	2.5	7.87	0.171	1	PF00462 (1);		AT5G14070.1	83	6e-48	69
		Gh_D07G2345	WGD/segmental	Glutaredoxin-C1	D07	55040755	55041135	+	381	381	381	1	126	13.659	2.5	7.87	0.186	1	PF00462 (1);		AT5G14070.1	83	7e-48	69
		Gh_A02G0462	WGD/segmental	Monothiol glutaredoxin-S2	A02	6609041	6609349	+	309	309	309	1	102	11.385	0	6.493	0.342	1	PF00462 (1);		AT5G18600.1	100	1e-55	78
		Gh_D02G0517	WGD/segmental	Monothiol glutaredoxin-S2	D02	6959325	6959633	+	309	309	309	1	102	11.355	2	7.941	0.272	1	PF00462 (1);		AT5G18600.1	100	3e-56	79
		Gh_D10G1672	Tandem	Monothiol glutaredoxin-S2	D10	46317160	46317468	+	309	309	309	1	102	11.276	2.5	8.081	0.156	1	PF00462 (1);		AT5G18600.1	100	6e-57	79
		Gh_A10G1429	WGD/segmental	Monothiol glutaredoxin-S2	A10	77105089	77105397	-	309	309	309	1	102	11.126	1.5	7.443	0.286	1	PF00462 (1);		AT5G18600.1	100	2e-55	77
		Gh_D10G1670	WGD/segmental	Monothiol glutaredoxin-S2	D10	46195478	46195786	-	309	309	309	1	102	11.126	1.5	7.443	0.286	1	PF00462 (1);		AT5G18600.1	100	2e-55	77
		Gh_A10G1430	Tandem	Monothiol glutaredoxin-S7	A10	77246372	77246680	+	309	309	309	1	102	11.201	2.5	7.959	0.32	1	PF00462 (1);		AT4G15670.1	100	2e-53	74
		Gh_D10G1671	Tandem	Monothiol glutaredoxin-S7	D10	46292881	46293189	+	309	309	309	1	102	11.166	1	7.289	0.374	1	PF00462 (1);		AT4G15670.1	100	6e-53	75
		Gh_A12G0067	WGD/segmental	Monothiol glutaredoxin-S1	A12	932536	932844	+	309	309	309	1	102	11.151	1.5	8.056	0.274	1	PF00462 (1);		AT1G03020.1	100	1e-51	69
		Gh_D12G0083	WGD/segmental	Monothiol glutaredoxin-S1	D12	1062614	1062922	+	309	309	309	1	102	11.226	1.5	8.056	0.307	1	PF00462 (1);		AT1G03020.1	100	3e-51	69
		Gh_A11G1070	WGD/segmental	Monothiol glutaredoxin-S6	A11	12367902	12368210	-	309	309	309	1	102	11.219	1.5	8.054	0.2	1	PF00462 (1);		AT3G62930.1	100	1e-53	73
		Gh_D11G1223	WGD/segmental	Monothiol glutaredoxin-S6	D11	11481726	11482034	-	309	309	309	1	102	11.233	1.5	8.054	0.203	1	PF00462 (1);		AT3G62930.1	100	1e-53	72
		Gh_A08G0667	WGD/segmental	Monothiol glutaredoxin-S6	A08	14588890	14589198	+	309	309	309	1	102	11.318	3.5	8.904	0.153	1	PF00462 (1);		AT3G62930.1	100	7e-52	70
		Gh_D08G0768	WGD/segmental	Monothiol glutaredoxin-S6	D08	11953829	11954137	+	309	309	309	1	102	11.318	3.5	8.904	0.153	1	PF00462 (1);		AT3G62930.1	100	7e-52	70
		Gh_A08G1019	WGD/segmental	Monothiol glutaredoxin-S1	A08	71168254	71168562	+	309	309	309	1	102	11.217	3.5	8.915	0.319	1	PF00462 (1);		AT1G03020.1	100	7e-50	67
		Gh_D08G1293	WGD/segmental	Monothiol glutaredoxin-S6	D08	42454242	42454550	+	309	309	309	1	102	11.16	3	8.505	0.301	1	PF00462 (1);		AT3G62930.1	100	1e-48	70
		Gh_A12G0066	WGD/segmental	Monothiol glutaredoxin-S1	A12	930122	930430	+	309	309	309	1	102	11.201	1.5	8.055	0.153	1	PF00462 (1);		AT1G03020.1	100	4e-52	69
		Gh_D12G0082	WGD/segmental	Monothiol glutaredoxin-S1	D12	1060322	1060564	+	243	243	243	1	80	8.832	1.5	8.526	-0.029	1	PF00462 (1);		AT1G03020.1	100	1e-37	70
		Gh_A11G0180	WGD/segmental	Monothiol glutaredoxin-S14, chloroplastic	A11	1668813	1670924	-	2112	507	507	3	168	18.909	4.5	8.595	-0.036	1	PF00462 (1);		AT3G54900.1	68	5e-67	82
		Gh_D11G0190	WGD/segmental	Monothiol glutaredoxin-S14, chloroplastic	D11	1671995	1674058	-	2064	507	507	3	168	18.84	4.5	8.595	-0.048	1	PF00462 (1);		AT3G54900.1	68	4e-66	81
		Gh_A09G2433	WGD/segmental	Bifunctional monothiol glutaredoxin-S16, chloroplastic	scaffold2302_A09	97060	98832	+	1773	894	894	2	297	32.589	1.5	7.34	-0.168	1	PF00462 (1);		AT2G38270.1	99	4e-145	67
		Gh_D09G1570	WGD/segmental	Bifunctional monothiol glutaredoxin-S16, chloroplastic	D09	43267291	43269062	-	1772	894	894	2	297	32.557	-0.5	6.288	-0.178	1	PF00462 (1);		AT2G38270.1	99	2e-144	67
		Gh_Sca124052G01	Dispersed	Bifunctional monothiol glutaredoxin-S16, chloroplastic	scaffold124052	135	350	-	216	216	216	1	71	7.986	-7	3.933	-0.199	1	PF00462 (1);		AT2G38270.1	97	4e-38	83
		Gh_A10G0680	WGD/segmental	Monothiol glutaredoxin-S15, mitochondrial	A10	11533033	11535573	+	2541	513	513	6	170	18.598	3	8.453	-0.159	1	PF00462 (1);		AT3G15660.1	98	6e-77	68
		Gh_D10G0706	WGD/segmental	Monothiol glutaredoxin-S15, mitochondrial	D10	8131824	8134256	-	2433	513	513	6	170	18.628	3	8.456	-0.145	1	PF00462 (1);		AT3G15660.1	98	2e-76	67
		Gh_A10G0246	WGD/segmental	Monothiol glutaredoxin-S17	A10	2137464	2145654	+	8191	3264	3264	13	1087	120.309	-11	5.56	-0.64	5	PF08590 (1); PF00085 (1); PF00462 (3);		AT4G04950.1	44	0	72
		Gh_D10G0226	Dispersed	Monothiol glutaredoxin-S17	D10	1970806	1973501	+	2696	1470	1470	3	489	53.548	-12	4.906	-0.291	4	PF00085 (1); PF00462 (3);		AT4G04950.1	99	0	73
		Gh_A05G1984	WGD/segmental	Glutaredoxin	A05	21232197	21237316	-	5120	2067	2067	7	688	77.881	-22.5	4.861	-0.537	3	PF00462 (1); PF00610 (1); PF04784 (1);		AT4G08550.1	83	0	58
		Gh_D05G3813	WGD/segmental	Glutaredoxin	scaffold4067_D05	72107	76347	+	4241	2067	2067	6	688	77.755	-21.5	4.893	-0.532	3	PF00462 (1); PF00610 (1); PF04784 (1);		AT4G08550.1	83	0	59
		Gh_D01G1882	WGD/segmental	Glutaredoxin	D01	56757532	56761501	+	3970	2151	2151	6	716	81.198	-8.5	5.611	-0.4	3	PF00462 (1); PF00610 (1); PF04784 (1);		AT4G08550.1	79	0	56
		Gh_A13G1107	Singleton	Monothiol glutaredoxin-S10	A13	61684687	61686698	-	2012	372	372	5	123	14.081	15.5	11.604	0.298	NA	-		AT5G49390.1	27	1e-08	76
		Gh_D13G0259	WGD/segmental	Glutaredoxin-3	D13	2486695	2490672	+	3978	2115	2115	6	704	80.572	9.5	7.455	-0.374	3	PF00462 (1); PF00610 (1); PF04784 (1);		AT3G11920.1	80	0	51
		Gh_A03G0969	WGD/segmental	Glutaredoxin-2	A03	62646613	62650167	+	3555	1983	1983	6	660	75.249	5.5	7.217	-0.464	3	PF00462 (1); PF00610 (1); PF04784 (1);		AT3G11920.1	85	0	58
		Gh_D02G1352	WGD/segmental	Glutaredoxin-2	D02	45268207	45271600	+	3394	1980	1980	6	659	75.125	5.5	7.209	-0.464	3	PF00462 (1); PF00610 (1); PF04784 (1);		AT3G11920.1	85	0	58
		Gh_A12G2492	WGD/segmental	Glutaredoxin-C1	A12	87344684	87345384	-	701	450	450	3	149	16.014	0	6.502	0.144	1	PF00462 (1);		AT5G63030.1	96	2e-46	50
		Gh_D12G2620	WGD/segmental	Glutaredoxin-C1	D12	58990648	58991357	-	710	375	375	4	124	13.33	-1	5.664	-0.035	1	PF00462 (1);		AT5G63030.1	95	5e-53	62
		Gh_A09G0271	WGD/segmental	Glutaredoxin-C2	A09	8759629	8761659	-	2031	345	345	4	114	12.268	0.5	7.124	0.407	1	PF00462 (1);		AT5G63030.1	71	1e-35	67
		Gh_D09G0272	WGD/segmental	Glutaredoxin-C2	D09	8641489	8643504	-	2016	345	345	4	114	12.28	-1.5	4.968	0.39	1	PF00462 (1);		AT5G63030.1	71	1e-36	69
		Gh_A08G0733	WGD/segmental	Glutaredoxin-C4	A08	21390531	21392047	-	1517	396	396	4	131	14.432	1	7.344	0.08	1	PF00462 (1);		AT5G20500.1	95	2e-60	67
		Gh_D08G0870	WGD/segmental	Glutaredoxin-C4	D08	16033223	16034737	-	1515	396	396	4	131	14.463	0	6.515	0.105	1	PF00462 (1);		AT5G20500.1	96	2e-61	70
		Gh_A10G0874	WGD/segmental	Glutaredoxin-C3	A10	18973640	18975584	-	1945	396	396	4	131	14.254	3	8.713	0.302	1	PF00462 (1);		AT1G77370.1	100	1e-53	65
		Gh_D10G0879	WGD/segmental	Glutaredoxin-C3	D10	11190498	11191661	+	1164	396	396	4	131	14.192	3	8.241	0.318	1	PF00462 (1);		AT1G77370.1	100	1e-51	62
		Gh_A07G1852	WGD/segmental	Glutaredoxin-C5, chloroplastic	A07	73615063	73617844	-	2782	540	540	4	179	19.59	8	9.512	-0.22	1	PF00462 (1);		AT4G28730.1	63	2e-46	62
		Gh_D07G2061	WGD/segmental	Glutaredoxin-C5, chloroplastic	D07	50516815	50519588	-	2774	540	540	4	179	19.518	7.5	9.555	-0.217	1	PF00462 (1);		AT4G28730.1	64	4e-47	62
		Gh_A11G1243	WGD/segmental	Glutaredoxin-C5, chloroplastic	A11	15483262	15486021	-	2760	519	519	4	172	19.062	5.5	9.187	-0.261	1	PF00462 (1);		AT4G28730.1	69	3e-40	54
		Gh_D11G1390	WGD/segmental	Glutaredoxin-C5, chloroplastic	D11	13716818	13719547	-	2730	519	519	4	172	19.043	5.5	9.227	-0.27	1	PF00462 (1);		AT4G28730.1	69	3e-40	54
		Gh_A08G1017	WGD/segmental	Glutaredoxin-C11	A08	71110508	71110816	-	309	309	309	1	102	11.26	3	8.326	0.031	1	PF00462 (1);		AT3G62950.1	100	9e-60	82
		Gh_D08G1291	WGD/segmental	Glutaredoxin-C11	D08	42418428	42418736	-	309	309	309	1	102	11.26	3	8.326	0.031	1	PF00462 (1);		AT3G62950.1	100	9e-60	82
		Gh_A11G1071	WGD/segmental	Glutaredoxin-C11	A11	12408678	12408986	+	309	309	309	1	102	11.214	1.5	7.438	0.104	1	PF00462 (1);		AT3G62950.1	100	8e-56	79
		Gh_D11G1224	WGD/segmental	Glutaredoxin-C11	D11	11496663	11496971	+	309	309	309	1	102	11.241	1.5	7.438	0.077	1	PF00462 (1);		AT3G62950.1	100	7e-56	79
		Gh_A09G2122	WGD/segmental	Monothiol glutaredoxin-S10	A09	74181994	74182302	+	309	309	309	1	102	11.204	5	8.998	0.197	1	PF00462 (1);		AT3G21460.1	100	9e-58	77
		Gh_D09G2327	WGD/segmental	Monothiol glutaredoxin-S10	D09	50298981	50299289	+	309	309	309	1	102	11.204	5	8.998	0.197	1	PF00462 (1);		AT3G21460.1	100	9e-58	77
		Gh_Sca181996G01	Dispersed	Monothiol glutaredoxin-S10	scaffold181996	22	264	+	243	243	243	1	80	8.85	2	8.231	0.131	1	PF00462 (1);		AT3G21460.1	100	2e-43	76
		Gh_A02G0461	WGD/segmental	Monothiol glutaredoxin-S10	A02	6532389	6532697	-	309	309	309	1	102	11.115	4.5	8.991	0.182	1	PF00462 (1);		AT3G21460.1	100	2e-56	77
		Gh_D02G0516	WGD/segmental	Monothiol glutaredoxin-S10	D02	6942981	6943289	-	309	309	309	1	102	11.132	4.5	8.991	0.235	1	PF00462 (1);		AT3G21460.1	100	3e-55	76
		Gh_Sca049404G01	Dispersed	Monothiol glutaredoxin-S10	scaffold49404	37	279	+	243	243	243	1	80	8.778	1.5	8.218	0.18	1	PF00462 (1);		AT3G21460.1	100	7e-41	75
		Gh_A08G0666	WGD/segmental	Monothiol glutaredoxin-S9	A08	14471596	14471901	-	306	306	306	1	101	11.049	2	7.852	0.27	1	PF00462 (1);		AT2G30540.1	98	1e-53	72
		Gh_D08G0767	WGD/segmental	Monothiol glutaredoxin-S9	D08	11858826	11859131	-	306	306	306	1	101	11.019	2	7.852	0.295	1	PF00462 (1);		AT2G30540.1	98	2e-53	72
		Gh_Sca150730G01	Dispersed	Monothiol glutaredoxin-S9	scaffold150730	165	317	-	153	153	153	1	50	5.279	3.5	9.496	0.588	NA	-		AT2G30540.1	96	2e-22	73
		Gh_A08G1016	WGD/segmental	Monothiol glutaredoxin-S9	A08	71108031	71108336	-	306	306	306	1	101	11.091	-1	5.663	0.227	1	PF00462 (1);		AT2G30540.1	98	5e-51	72
		Gh_A12G0064	WGD/segmental	Monothiol glutaredoxin-S9	A12	904488	904793	-	306	306	306	1	101	10.961	0	6.485	0.236	1	PF00462 (1);		AT2G30540.1	100	2e-50	73
		Gh_D12G0079	WGD/segmental	Glutaredoxin-C13	D12	1030760	1031065	-	306	306	306	1	101	11.06	1	7.246	0.195	1	PF00462 (1);		AT2G47880.1	99	5e-50	69
		Gh_A11G1072	WGD/segmental	Monothiol glutaredoxin-S9	A11	12412227	12412532	+	306	306	306	1	101	10.965	0.5	6.749	0.256	1	PF00462 (1);		AT2G30540.1	98	2e-52	71
		Gh_D11G1225	WGD/segmental	Monothiol glutaredoxin-S9	D11	11503500	11503805	+	306	306	306	1	101	10.965	0.5	6.749	0.256	1	PF00462 (1);		AT2G30540.1	98	2e-52	71
		Gh_A13G1654	WGD/segmental	Glutaredoxin-C6	A13	75449686	75450078	-	393	393	393	1	130	13.72	0.5	6.617	0.355	1	PF00462 (1);		AT4G33040.1	94	4e-52	69
		Gh_D13G2017	WGD/segmental	Glutaredoxin-C6	D13	55635049	55635498	-	450	450	450	1	149	15.738	3.5	7.545	0.258	1	PF00462 (1);		AT4G33040.1	93	9e-54	64
		Gh_A08G2216	WGD/segmental	Glutaredoxin-C6	A08	103125727	103126245	+	519	519	519	1	172	18.139	-1.5	6.129	0.071	1	PF00462 (1);		AT4G33040.1	98	3e-54	59
		Gh_D08G2582	WGD/segmental	Glutaredoxin-C6	D08	65455167	65455664	+	498	498	498	1	165	17.444	-0.5	6.406	0.052	1	PF00462 (1);		AT4G33040.1	98	3e-56	63
		Gh_A06G0776	WGD/segmental	Glutaredoxin-C6	A06	27623909	27624283	+	375	375	375	1	124	13.151	-1.5	6.129	0.373	1	PF00462 (1);		AT4G33040.1	100	4e-51	67
		Gh_D06G0900	WGD/segmental	Glutaredoxin-C6	D06	17811598	17811972	+	375	375	375	1	124	13.233	-0.5	6.381	0.365	1	PF00462 (1);		AT4G33040.1	100	9e-52	67
		Gh_A05G0320	WGD/segmental	Glutaredoxin-C6	A05	3555127	3555594	+	468	468	468	1	155	16.542	-0.5	6.383	0.059	1	PF00462 (1);		AT4G33040.1	98	7e-57	64
		Gh_D05G0426	WGD/segmental	Glutaredoxin-C6	D05	3457494	3457958	+	465	465	465	1	154	16.411	-1.5	6.132	0.131	1	PF00462 (1);		AT4G33040.1	98	8e-58	65
		Gh_A05G1233	WGD/segmental	Glutaredoxin-C1	A05	12432322	12432729	-	408	408	408	1	135	14.256	1.5	7.387	0.519	1	PF00462 (1);		AT5G14070.1	75	6e-29	50
		Gh_D05G1405	WGD/segmental	Glutaredoxin-C1	D05	12411056	12411463	-	408	408	408	1	135	14.256	1.5	7.387	0.519	1	PF00462 (1);		AT5G14070.1	75	6e-29	50
		Gh_A10G0397	WGD/segmental	Glutaredoxin-C8	A10	3975814	3976152	+	339	339	339	1	112	11.78	-0.5	6.225	0.585	1	PF00462 (1);		AT5G14070.1	100	2e-27	48
		Gh_D10G0411	WGD/segmental	Glutaredoxin-C8	D10	3788637	3788975	+	339	339	339	1	112	11.779	-0.5	6.225	0.539	1	PF00462 (1);		AT5G14070.1	100	1e-27	48
		Gh_D06G2162	WGD/segmental	Glutaredoxin-C9	D06	63423074	63423421	+	348	348	348	1	115	12.9	0.5	7.188	-0.03	1	PF00462 (1);		AT1G28480.1	100	1e-14	39
		Gh_A10G0264	WGD/segmental	Glutaredoxin-C9	A10	2327028	2327480	-	453	453	453	1	150	15.402	-3.5	4.905	0.177	1	PF00462 (1);		AT1G28480.1	95	8e-45	54
		Gh_D10G0264	WGD/segmental	Glutaredoxin-C9	D10	2281347	2281802	-	456	456	456	1	151	15.285	0.5	6.763	0.211	1	PF00462 (1);		AT1G28480.1	95	9e-45	54
		Gh_A03G1365	WGD/segmental	Glutaredoxin-C9	A03	92577639	92578061	+	423	423	423	1	140	15.083	3.5	7.989	0.116	1	PF00462 (1);		AT1G28480.1	81	8e-42	63
		Gh_D02G1805	WGD/segmental	Glutaredoxin-C9	D02	60902588	60903010	+	423	423	423	1	140	15.08	2.5	7.508	0.109	1	PF00462 (1);		AT1G28480.1	81	5e-43	64
		Gh_A05G1338	WGD/segmental	Glutaredoxin-C9	A05	13695324	13695755	+	432	432	432	1	143	15.242	0.5	6.66	0.245	1	PF00462 (1);		AT1G28480.1	95	8e-46	59
		Gh_D05G1507	WGD/segmental	Glutaredoxin-C9	D05	13571591	13572022	+	432	432	432	1	143	15.203	-0.5	6.34	0.192	1	PF00462 (1);		AT1G28480.1	95	4e-47	61
		Gh_D02G1766	WGD/segmental	Putative glutaredoxin-C14	D02	60130688	60131065	-	378	378	378	1	125	13.826	3.5	8.317	0.158	1	PF00462 (1);		AT5G14070.1	85	1e-44	62
		Gh_A12G1300	WGD/segmental	Glutaredoxin-C1	A12	68759986	68760324	+	339	339	339	1	112	12.009	2	7.947	0.402	1	PF00462 (1);		AT5G14070.1	95	2e-47	65
		Gh_D12G1423	WGD/segmental	Glutaredoxin-C1	D12	43663677	43664015	+	339	339	339	1	112	12.009	2	7.947	0.402	1	PF00462 (1);		AT5G14070.1	95	2e-47	65
		Gh_A04G0859	WGD/segmental	Glutaredoxin-C1	A04	55903343	55903723	-	381	381	381	1	126	13.637	-1	5.676	0.319	1	PF00462 (1);		AT5G14070.1	84	5e-43	62
		Gh_D04G1357	WGD/segmental	Glutaredoxin-C1	D04	44224516	44224896	-	381	381	381	1	126	13.68	1	7.245	0.318	1	PF00462 (1);		AT5G14070.1	84	4e-43	62
		Gh_Sca139666G01	Dispersed	Glutaredoxin-C1	scaffold139666	3	308	+	306	306	306	1	101	10.809	2	7.947	0.491	1	PF00462 (1);		AT5G14070.1	100	1e-42	64
		Gh_A05G2931	WGD/segmental	Glutaredoxin-C1	A05	71155143	71155520	+	378	378	378	1	125	13.537	3.5	8.221	0.202	1	PF00462 (1);		AT5G14070.1	84	1e-47	67
		Gh_D04G0715	WGD/segmental	Glutaredoxin-C1	D04	14513587	14513964	+	378	378	378	1	125	13.551	3.5	8.221	0.205	1	PF00462 (1);		AT5G14070.1	84	9e-48	68
Peroxidase (PER)	G. arboretum	Cotton_A_32877	Dispersed	Peroxidase 21	Chr12	24249074	24251233	+	2160	987	987	5	328	37.176	5	7.299	-0.294	1	PF00141 (1);		AT2G37130.1	93	8e-167	71
2RH+H2O2 →R·+2H2O		Cotton_A_12086	Dispersed	Peroxidase 21	Chr11	77035881	77037251	+	1371	990	990	5	329	37.119	0.5	6.576	-0.312	1	PF00141 (1);		AT2G37130.1	92	2e-178	76
		Cotton_A_04686	Dispersed	Peroxidase 42	Chr10	20221473	20223018	+	1546	987	987	4	328	37.125	8.5	8.211	-0.359	1	PF00141 (1);		AT4G21960.1	100	0	82
		Cotton_A_01355	Dispersed	Peroxidase 66	Chr06	120718664	120719306	+	643	456	456	3	151	16.836	4	8.209	0.068	1	PF00141 (1);		AT5G51890.1	89	5e-63	68
		Cotton_A_35692	Tandem	Peroxidase 42	Chr13	102889350	102889900	-	551	378	378	3	125	14.043	13	10.252	-0.365	1	PF00141 (1);		AT4G21960.1	100	1e-60	64
		Cotton_A_29628	Dispersed	Peroxidase 29	Chr09	43791163	43795329	-	4167	1269	1269	4	422	43.455	12.5	8.949	-0.022	1	PF00141 (1);		AT3G17070.1	71	6e-115	53
		Cotton_A_04661	Dispersed	Peroxidase 29	Chr10	20050944	20052105	-	1162	1008	1008	3	335	36.597	5.5	8.146	0.01	1	PF00141 (1);		AT3G17070.1	92	2e-93	47
		Cotton_A_13096	Dispersed	Peroxidase 65	Chr11	61624979	61625974	-	996	996	996	1	331	36.377	2	7.061	-0.031	1	PF00141 (1);		AT5G47000.1	96	6e-132	58
		Cotton_A_26586	Dispersed	Peroxidase 31	Chr06	119104678	119105187	+	510	510	510	1	169	19.349	6	9.049	-0.483	1	PF00141 (1);		AT3G28200.1	98	9e-71	59
		Cotton_A_19460	Dispersed	Peroxidase 31	Chr01	124852556	124854173	+	1618	1618	981	1	326	35.69	5	7.936	-0.155	1	PF00141 (1);		AT3G28200.1	91	1e-166	73
		Cotton_A_23460	Dispersed	Peroxidase 31	Chr12	80814036	80815514	-	1479	1479	966	1	321	35.443	9.5	8.762	-0.221	1	PF00141 (1);		AT3G28200.1	93	4e-161	70
		Cotton_A_40054	Dispersed	Peroxidase 65	Chr07	124412698	124413693	-	996	996	996	1	331	36.809	1.5	7.243	-0.073	1	PF00141 (1);		AT5G47000.1	99	1e-132	56
		Cotton_A_37129	Dispersed	Peroxidase 16	Chr02	75910302	75913657	-	3356	990	990	4	329	36.324	19	10.332	-0.209	1	PF00141 (1);		AT2G18980.1	100	0	76
		Cotton_A_06419	WGD/segmental	Peroxidase 51	Chr12	5199185	5200436	-	1252	990	990	4	330	35.95	18	9.883	-0.102	1	PF00141 (1);		AT4G37530.1	93	4e-162	69
		Cotton_A_09755	WGD/segmental	Peroxidase 73	Chr03	36138882	36141955	+	3074	1241	993	4	330	36.085	14.5	9.605	-0.158	1	PF00141 (1);		AT5G67400.1	100	7e-179	71
		Cotton_A_38803	Dispersed	Peroxidase 51	Chr06	61373283	61374218	-	936	741	741	4	246	27.349	4.5	8.211	-0.254	1	PF00141 (1);		AT4G37530.1	100	5e-122	67
		Cotton_A_31530	WGD/segmental	Peroxidase 55	Chr12	141735275	141736835	+	1561	975	975	3	324	35.313	-8.5	4.593	-0.006	1	PF00141 (1);		AT5G14130.1	97	6e-144	65
		Cotton_A_28610	WGD/segmental	Peroxidase 55	Chr01	98669525	98672576	-	3052	1866	1866	6	621	67.513	-13	4.752	-0.093	2	PF00141 (2);		AT5G14130.1	51	2e-140	63
		Cotton_A_31531	Tandem	Peroxidase 45	Chr12	141763912	141765110	+	1199	1023	1023	3	340	37.575	15	9.452	-0.084	1	PF00141 (1);		AT4G30170.1	89	8e-139	62
		Cotton_A_28176	Dispersed	Peroxidase 45	Chr01	78885261	78886928	+	1668	1410	996	4	331	36.381	16.5	9.581	-0.063	1	PF00141 (1);		AT4G30170.1	92	4e-154	67
		Cotton_A_11302	Dispersed	Peroxidase 19	Chr10	19196551	19198723	-	2173	1478	1053	3	350	38.214	16	9.51	-0.015	1	PF00141 (1);		AT2G34060.1	97	8e-167	65
		Cotton_A_30716	Dispersed	Peroxidase 44	Chr04	13520635	13521682	+	1048	960	960	2	319	35.094	17	10.431	0.011	1	PF00141 (1);		AT4G26010.1	98	5e-125	58
		Cotton_A_29727	Dispersed	Peroxidase 57	Chr03	76534505	76535675	+	1171	1091	960	2	319	34.863	14	9.777	-0.103	1	PF00141 (1);		AT5G17820.1	97	5e-132	59
		Cotton_A_13869	Dispersed	Peroxidase 60	Chr10	70777336	70778692	+	1357	1008	1008	4	335	36.009	3	8.03	-0.051	1	PF00141 (1);		AT5G22410.1	87	5e-96	51
		Cotton_A_29791	Dispersed	Probable peroxidase 26	Chr13	92533097	92533995	-	899	543	543	2	180	20.268	5	9.107	-0.503	1	PF00141 (1);		AT2G43480.1	99	6e-91	69
		Cotton_A_25132	Dispersed	Peroxidase 43	Chr02	32370641	32372148	+	1508	963	963	4	320	34.532	-4.5	5.173	0.057	1	PF00141 (1);		AT4G25980.1	98	3e-171	73
		Cotton_A_18127	Dispersed	Peroxidase 43	Chr04	47689870	47692538	-	2669	675	675	4	224	24.499	-4	5.132	-0.079	2	PF00141 (1); PF06364 (1);		AT4G25980.1	67	1e-63	66
		Cotton_A_04004	Dispersed	Peroxidase 43	Chr10	80175335	80176467	-	1133	429	429	3	142	15.23	-3.5	4.988	-0.204	1	PF00141 (1);		AT4G25980.1	82	2e-54	73
		Cotton_A_01354	Dispersed	Peroxidase 66	Chr06	120719800	120720579	+	780	780	315	1	104	11.644	2	8.693	-0.501	1	PF00141 (1);		AT5G51890.1	100	4e-46	70
		Cotton_A_39374	Dispersed	Peroxidase 43	Chr02	51905824	51907034	+	1211	978	978	4	325	35.126	5.5	8.388	-0.051	1	PF00141 (1);		AT4G25980.1	99	2e-131	56
		Cotton_A_11452	Dispersed	Peroxidase 25	Chr10	69252651	69253884	-	1234	978	978	4	325	35.24	2.5	7.365	-0.153	1	PF00141 (1);		AT2G41480.1	99	4e-177	71
		Cotton_A_05819	Dispersed	Peroxidase 53	Chr03	40122700	40124113	+	1414	969	969	4	322	34.917	4.5	7.753	-0.103	1	PF00141 (1);		AT5G06720.1	98	1e-130	58
		Cotton_A_34146	Dispersed	Peroxidase 53	Chr04	37393732	37394973	+	1242	942	942	4	313	34.053	1.5	6.983	-0.045	1	PF00141 (1);		AT5G06720.1	98	3e-119	55
		Cotton_A_11599	Dispersed	Peroxidase 53	Chr01	110477119	110478682	+	1564	960	960	5	320	35.033	8	8.572	-0.137	1	PF00141 (1);		AT5G06720.1	98	4e-126	57
		Cotton_A_37873	Proximal	Peroxidase 54	Chr12	68960000	68961299	-	1300	1038	1038	4	345	37.47	-10.5	4.564	0.045	1	PF00141 (1);		AT5G06730.1	90	2e-121	56
		Cotton_A_06359	Dispersed	Peroxidase 10	Chr12	5878146	5880314	-	2169	1020	1020	4	339	37.62	4	7.729	-0.08	1	PF00141 (1);		AT1G49570.1	99	4e-154	63
		Cotton_A_30788	Dispersed	Peroxidase 10	Chr06	55347936	55349304	+	1369	951	951	4	316	35.039	4.5	7.93	-0.148	1	PF00141 (1);		AT1G49570.1	92	1e-118	57
		Cotton_A_06005	WGD/segmental	Peroxidase 52	Chr12	93446940	93448563	+	1624	969	969	4	322	34.485	12.5	9.611	-0.201	1	PF00141 (1);		AT5G05340.1	92	2e-178	80
		Cotton_A_15755	WGD/segmental	Peroxidase 52	Chr13	71752947	71755045	-	2099	978	978	4	325	35.427	12.5	9.015	-0.162	1	PF00141 (1);		AT5G05340.1	92	1e-165	76
		Cotton_A_40362	Dispersed	Peroxidase 52	Chr13	24605359	24606566	+	1208	960	960	4	319	34.563	11	8.917	-0.133	1	PF00141 (1);		AT5G05340.1	92	5e-123	58
		Cotton_A_12476	Tandem	Peroxidase 70	Chr11	8340181	8340931	-	751	576	576	3	191	20.714	1.5	6.982	0.14	1	PF00141 (1);		AT5G05340.1	71	2e-48	57
		Cotton_A_08729	Dispersed	Peroxidase 40	Chr05	50524427	50525478	+	1052	795	795	4	264	28.321	-13.5	4.204	-0.035	1	PF00141 (1);		AT4G16270.1	100	2e-125	67
		Cotton_A_02009	WGD/segmental	Peroxidase 72	Chr06	29491469	29492813	-	1345	996	996	4	331	36.436	15.5	9.507	-0.229	1	PF00141 (1);		AT5G66390.1	98	0	77
		Cotton_A_14678	WGD/segmental	Peroxidase 72	Chr04	86026351	86028068	-	1718	1470	1005	4	334	36.938	10.5	8.598	-0.217	1	PF00141 (1);		AT5G66390.1	99	0	78
		Cotton_A_07846	Dispersed	Peroxidase 9	Chr11	73020432	73022264	-	1833	1510	1050	4	349	37.76	4	7.977	-0.056	1	PF00141 (1);		AT1G44970.1	100	0	75
		Cotton_A_07879	Dispersed	Peroxidase 20	Chr06	50904721	50905969	-	1249	966	966	4	321	36.037	-2	5.998	-0.127	1	PF00141 (1);		AT2G35380.1	95	3e-164	70
		Cotton_A_32534	Dispersed	Peroxidase 11	scaffold254	308268	314092	+	5825	2547	2547	6	848	92.797	3.5	6.894	0.021	1	PF00141 (1);		AT1G68850.1	37	6e-171	75
		Cotton_A_06224	Dispersed	Peroxidase 11	Chr06	69278921	69280216	+	1296	1011	1011	4	336	37.036	-5.5	5.049	-0.002	1	PF00141 (1);		AT1G68850.1	90	2e-170	71
		Cotton_A_35302	Dispersed	Peroxidase 17	Chr06	47278577	47279836	-	1260	1095	990	3	329	36.654	-6	4.878	-0.14	1	PF00141 (1);		AT2G22420.1	99	0	73
		Cotton_A_35693	Tandem	Peroxidase 42	Chr13	102885227	102885777	-	551	378	378	3	125	14.043	13	10.252	-0.365	1	PF00141 (1);		AT4G21960.1	100	1e-60	64
		Cotton_A_36159	Dispersed	Peroxidase 17	Chr04	74299498	74302398	-	2901	1400	972	3	323	35.536	-9	4.659	-0.064	1	PF00141 (1);		AT2G22420.1	100	0	79
		Cotton_A_36217	Dispersed	Peroxidase 12	Chr08	62795329	62797649	-	2321	1014	1014	3	337	36.644	6	8.204	-0.137	1	PF00141 (1);		AT1G71695.1	94	1e-162	68
		Cotton_A_10391	Dispersed	Peroxidase 12	Chr09	69004781	69007424	-	2644	1260	1074	3	357	38.84	-1.5	5.805	-0.019	1	PF00141 (1);		AT1G71695.1	90	2e-160	68
		Cotton_A_16449	WGD/segmental	Peroxidase 64	Chr08	83853531	83854868	+	1338	951	951	4	316	34.145	14	9.327	-0.086	1	PF00141 (1);		AT5G42180.1	100	6e-175	73
		Cotton_A_18230	WGD/segmental	Peroxidase 64	Chr12	104986820	104988082	+	1263	954	954	4	317	34.234	13.5	9.283	0.007	1	PF00141 (1);		AT5G42180.1	94	3e-173	76
		Cotton_A_01533	WGD/segmental	Peroxidase 64	Chr01	134962948	134964597	+	1650	1376	954	4	317	34.25	13	9.272	-0.096	1	PF00141 (1);		AT5G42180.1	97	6e-153	66
		Cotton_A_40805	Dispersed	Peroxidase 47	scaffold3996	12456	13924	-	1469	864	864	4	287	31.722	-4.5	5.024	-0.297	1	PF00141 (1);		AT4G33420.1	100	1e-169	78
		Cotton_A_36307	Dispersed	Peroxidase 24	Chr11	88595227	88598981	-	3755	990	990	4	329	36.578	13	9.29	-0.149	1	PF00141 (1);		AT2G39040.1	92	3e-113	55
		Cotton_A_38785	Proximal	Peroxidase 24	Chr07	23468415	23470578	-	2164	1089	1089	6	363	39.962	19	9.91	-0.06	1	PF00141 (1);		AT2G39040.1	95	3e-100	47
		Cotton_A_38788	Proximal	Peroxidase 24	Chr07	23453182	23454545	-	1364	987	987	4	328	35.815	8.5	8.786	-0.057	1	PF00141 (1);		AT2G39040.1	92	5e-114	55
		Cotton_A_23668	Tandem	Peroxidase 3	Chr06	32078834	32080051	-	1218	966	966	4	321	35.194	6.5	8.097	-0.136	1	PF00141 (1);		AT1G05260.1	96	7e-114	54
		Cotton_A_23666	Tandem	Peroxidase 3	Chr06	32099174	32100394	-	1221	972	972	4	323	35.561	12.5	8.99	-0.191	1	PF00141 (1);		AT1G05260.1	96	7e-119	55
		Cotton_A_23667	Tandem	Peroxidase 39	Chr06	32087943	32095613	-	7671	1047	1047	3	349	38.045	6.5	8.048	-0.121	1	PF00141 (1);		AT4G11290.1	100	3e-113	49
		Cotton_A_31063	Dispersed	Peroxidase 27	Chr06	58945693	58947253	-	1561	924	924	4	307	33.272	12	9.056	-0.125	1	PF00141 (1);		AT3G01190.1	100	9e-144	62
		Cotton_A_22835	Tandem	Peroxidase 27	Chr05	46441261	46442653	+	1393	930	930	4	309	33.77	11	8.708	-0.162	1	PF00141 (1);		AT3G01190.1	98	2e-142	64
		Cotton_A_36396	Tandem	Peroxidase 3	Chr13	27457736	27459292	-	1557	975	975	4	324	34.893	0.5	6.653	0.013	1	PF00141 (1);		AT1G05260.1	98	1e-157	65
		Cotton_A_36397	Tandem	Peroxidase 3	Chr13	27438956	27440217	+	1262	987	987	4	328	35.535	3	7.406	0.016	1	PF00141 (1);		AT1G05260.1	98	7e-161	66
		Cotton_A_36398	Tandem	Peroxidase 3	Chr13	27433634	27434896	-	1263	987	987	4	328	35.32	2.5	7.364	0.011	1	PF00141 (1);		AT1G05260.1	97	4e-158	66
		Cotton_A_22834	Tandem	Peroxidase 3	Chr05	46499785	46501353	+	1569	1310	984	4	327	35.52	4.5	7.989	-0.101	1	PF00141 (1);		AT1G05260.1	98	7e-159	66
		Cotton_A_19224	WGD/segmental	Peroxidase 46	Chr01	49141729	49143028	-	1300	990	990	4	329	35.568	-6.5	4.907	0.004	1	PF00141 (1);		AT2G24800.1	91	9e-149	68
		Cotton_A_01150	WGD/segmental	Peroxidase 18	Chr04	33582746	33584609	+	1864	1526	999	4	332	36.066	-5	5.049	-0.071	1	PF00141 (1);		AT2G24800.1	91	8e-148	66
		Cotton_A_17497	Dispersed	Peroxidase 7	Chr09	12080846	12082043	-	1198	1038	1038	3	345	38.141	-1.5	6.229	-0.093	1	PF00141 (1);		AT1G30870.1	88	4e-126	59
	G. raimondii	Gorai.009G419100	WGD/segmental	Peroxidase 21	Chr09	65292607	65294845	+	2239	1113	987	5	328	37.216	2	6.779	-0.286	1	PF00141 (1);		AT2G37130.1	93	9e-168	71
		Gorai.006G168000	WGD/segmental	Peroxidase 21	Chr06	42778855	42781289	+	2435	1598	990	5	329	37.144	-0.5	6.431	-0.311	1	PF00141 (1);		AT2G37130.1	92	9e-180	76
		Gorai.009G178400	Dispersed	Peroxidase 42	Chr09	13776673	13778817	-	2145	1596	999	4	332	37.673	11.5	8.695	-0.364	1	PF00141 (1);		AT4G21960.1	99	0	82
		Gorai.008G281600	Dispersed	Peroxidase 66	Chr08	55816191	55818253	-	2063	1320	1008	3	335	37.043	10.5	8.877	-0.219	1	PF00141 (1);		AT5G51890.1	95	6e-174	72
		Gorai.011G200600	Dispersed	Peroxidase 29	Chr11	48602180	48604682	+	2503	1204	972	3	323	35.701	9.5	8.636	-0.079	1	PF00141 (1);		AT3G17070.1	93	1e-115	53
		Gorai.006G187600	Dispersed	Peroxidase 65	Chr06	44449585	44450571	-	987	987	987	1	328	36.061	1.5	6.852	-0.104	1	PF00141 (1);		AT5G47000.1	97	4e-133	59
		Gorai.008G298000	Dispersed	Peroxidase 31	Chr08	57043343	57045011	-	1669	1669	1005	1	334	37.09	4	7.729	-0.07	1	PF00141 (1);		AT3G28200.1	92	2e-138	60
		Gorai.001G259400	WGD/segmental	Peroxidase 63	Chr01	53421180	53423546	-	2367	1689	1026	2	341	37.69	7	8.372	-0.104	1	PF00141 (1);		AT5G40150.1	88	1e-163	70
		Gorai.012G059300	WGD/segmental	Peroxidase 31	Chr12	8310005	8310970	-	966	966	966	1	321	35.509	10.5	9.018	-0.236	1	PF00141 (1);		AT3G28200.1	93	2e-163	71
		Gorai.002G164800	Proximal	Peroxidase 65	Chr02	40106361	40107390	-	1030	1030	996	1	331	36.922	4.5	8.188	-0.09	1	PF00141 (1);		AT5G47000.1	99	3e-134	57
		Gorai.002G165200	Proximal	Peroxidase 65	Chr02	40373651	40374646	+	996	996	996	1	331	36.739	3.5	7.968	-0.07	1	PF00141 (1);		AT5G47000.1	99	1e-134	56
		Gorai.004G098800	Dispersed	Peroxidase 16	Chr04	16735410	16738973	+	3564	1165	990	4	329	36.303	19.5	10.332	-0.222	1	PF00141 (1);		AT2G18980.1	100	1e-179	75
		Gorai.011G107800	WGD/segmental	Peroxidase 51	Chr11	12632775	12634611	+	1837	1556	993	4	330	36.006	19	9.99	-0.175	1	PF00141 (1);		AT4G37530.1	93	4e-164	69
		Gorai.003G029000	WGD/segmental	Peroxidase 73	Chr03	2622708	2625287	+	2580	1371	993	4	330	36.005	13.5	9.443	-0.134	1	PF00141 (1);		AT5G67400.1	100	3e-179	71
		Gorai.008G080800	WGD/segmental	Peroxidase 73	Chr08	15787962	15789978	+	2017	1631	993	5	330	35.839	9	8.647	-0.099	1	PF00141 (1);		AT5G67400.1	100	1e-178	72
		Gorai.012G086300	Tandem	Peroxidase 55	Chr12	14707094	14709280	-	2187	1598	978	3	325	35.402	-9.5	4.533	-0.023	1	PF00141 (1);		AT5G14130.1	96	3e-145	65
		Gorai.001G271800	WGD/segmental	Peroxidase 55	Chr01	54877951	54879434	+	1484	1350	966	3	321	35.039	-14.5	4.294	-0.076	1	PF00141 (1);		AT5G14130.1	98	2e-136	61
		Gorai.001G271900	Tandem	Peroxidase 55	Chr01	54879841	54881410	+	1570	1390	975	3	324	35.426	1.5	7.245	-0.068	1	PF00141 (1);		AT5G14130.1	98	3e-146	63
		Gorai.012G086200	WGD/segmental	Peroxidase 45	Chr12	14700172	14706444	-	6273	1027	978	3	325	35.569	10.5	8.952	-0.034	1	PF00141 (1);		AT4G30170.1	93	2e-139	62
		Gorai.009G165100	Dispersed	Peroxidase 19	Chr09	12666793	12669151	+	2359	1664	1062	3	353	38.419	17	9.632	0.006	1	PF00141 (1);		AT2G34060.1	97	2e-167	65
		Gorai.007G253300	WGD/segmental	Peroxidase 44	Chr07	40697006	40698050	-	1045	957	957	2	318	35.044	17	10.464	-0.035	1	PF00141 (1);		AT4G26010.1	97	2e-125	59
		Gorai.004G252800	WGD/segmental	Peroxidase 57	Chr04	59023476	59024647	+	1172	1091	945	2	314	34.227	12	9.476	-0.088	1	PF00141 (1);		AT5G17820.1	99	6e-132	59
		Gorai.009G084400	Dispersed	Peroxidase 60	Chr09	6151158	6152554	-	1397	1114	1014	4	337	36.096	0.5	6.732	0.072	1	PF00141 (1);		AT5G22410.1	93	5e-116	56
		Gorai.005G126200	Dispersed	Probable peroxidase 61	Chr05	28170634	28173071	-	2438	1493	1020	4	339	37.951	7	8.3	-0.263	1	PF00141 (1);		AT5G24070.1	97	2e-180	72
		Gorai.002G208800	Dispersed	Peroxidase 43	Chr02	55583491	55585673	-	2183	1617	972	4	323	34.88	-2.5	5.699	0.055	1	PF00141 (1);		AT4G25980.1	98	2e-170	73
		Gorai.003G090000	Dispersed	Peroxidase 13	Chr03	26403890	26405161	-	1272	1044	408	3	135	14.46	0	6.489	0.311	1	PF00141 (1);		AT1G77100.1	95	1e-46	61
		Gorai.003G088700	Dispersed	Peroxidase 43	Chr03	24645208	24646177	-	970	657	657	4	218	23.789	8.5	9.263	0.043	1	PF00141 (1);		AT4G25980.1	99	8e-74	50
		Gorai.009G017700	Dispersed	Peroxidase 25	Chr09	1400322	1402015	+	1694	1439	978	4	325	35.116	3.5	7.72	-0.113	1	PF00141 (1);		AT2G41480.1	99	6e-177	71
		Gorai.004G265900	Dispersed	Peroxidase 53	Chr04	60135664	60137297	-	1634	1122	969	5	322	34.883	4.5	7.753	-0.08	1	PF00141 (1);		AT5G06720.1	98	2e-130	58
		Gorai.007G238800	Dispersed	Peroxidase 53	Chr07	32592918	32594395	+	1478	1203	966	4	321	34.996	6	8.21	-0.096	1	PF00141 (1);		AT5G06720.1	98	1e-131	59
		Gorai.006G143400	Dispersed	Peroxidase 53	Chr06	40149364	40151033	+	1670	1374	1020	4	339	35.973	-3.5	4.952	-0.041	1	PF00141 (1);		AT5G06720.1	94	0	78
		Gorai.004G093000	Dispersed	Peroxidase 59	Chr04	13435625	13437698	+	2074	1374	999	4	332	35.762	0	6.496	0.054	1	PF00141 (1);		AT5G19890.1	99	2e-153	65
		Gorai.008G073800	Dispersed	Peroxidase 10	Chr08	13245572	13247278	+	1707	1322	984	4	327	36.263	4	7.689	-0.092	1	PF00141 (1);		AT1G49570.1	93	1e-127	60
		Gorai.012G150400	Dispersed	Peroxidase 10	Chr12	32420070	32422371	-	2302	1213	1020	4	339	37.391	2	7.06	-0.078	1	PF00141 (1);		AT1G49570.1	99	3e-157	63
		Gorai.012G016200	WGD/segmental	Peroxidase 52	Chr12	1841527	1843444	-	1918	1275	1014	4	337	36.051	11.5	9.201	-0.208	1	PF00141 (1);		AT5G05340.1	90	1e-176	79
		Gorai.009G295200	WGD/segmental	Peroxidase 52	Chr09	25739756	25741294	-	1539	1185	972	4	323	34.865	6	8.392	-0.173	1	PF00141 (1);		AT5G05340.1	92	2e-170	77
		Gorai.013G005800	WGD/segmental	Peroxidase 52	Chr13	410298	412852	+	2555	1419	1068	4	355	39.001	16.5	9.694	-0.222	1	PF00141 (1);		AT5G05340.1	84	3e-168	77
		Gorai.N001200	Proximal	Peroxidase 70	scaffold_14	210153	211264	+	1112	939	939	3	312	34.275	12.5	9.725	-0.087	1	PF00141 (1);		AT5G05340.1	92	1e-108	56
		Gorai.005G068200	Dispersed	Peroxidase 40	Chr05	7299198	7300617	+	1420	1168	993	4	330	35.706	-18.5	4.134	0.055	1	PF00141 (1);		AT4G16270.1	90	7e-146	67
		Gorai.007G049900	WGD/segmental	Peroxidase 72	Chr07	3512343	3513968	-	1626	1280	996	4	331	36.496	12.5	9.071	-0.259	1	PF00141 (1);		AT5G66390.1	98	0	78
		Gorai.007G070800	Dispersed	Peroxidase 72	Chr07	4994802	4996041	+	1240	957	957	5	318	34.984	13.5	9.538	-0.287	1	PF00141 (1);		AT5G66390.1	99	2e-166	69
		Gorai.007G065200	Dispersed	Peroxidase 72	Chr07	4579530	4580773	+	1244	1005	978	4	325	35.985	11.5	8.964	-0.242	1	PF00141 (1);		AT5G66390.1	94	0	77
		Gorai.007G199700	WGD/segmental	Peroxidase 72	Chr07	20278508	20280127	-	1620	1373	1005	4	334	36.886	10.5	8.598	-0.247	1	PF00141 (1);		AT5G66390.1	99	0	78
		Gorai.009G198700	WGD/segmental	Peroxidase 9	Chr09	15380563	15382302	+	1740	1417	1050	4	349	37.77	4.5	7.986	-0.064	1	PF00141 (1);		AT1G44970.1	100	0	76
		Gorai.008G228500	Dispersed	Peroxidase 20	Chr08	51467021	51468716	-	1696	1429	1002	4	333	37.488	-4	5.481	-0.037	1	PF00141 (1);		AT2G35380.1	99	1e-166	67
		Gorai.005G148900	WGD/segmental	Peroxidase 11	Chr05	40824145	40825861	+	1717	1544	1008	3	335	36.72	-6	5.03	0.041	1	PF00141 (1);		AT1G68850.1	97	4e-180	73
		Gorai.008G174200	WGD/segmental	Peroxidase 11	Chr08	45008652	45010374	-	1723	1432	1011	4	336	37.106	-6	4.926	0.023	1	PF00141 (1);		AT1G68850.1	97	1e-172	69
		Gorai.008G090200	WGD/segmental	Peroxidase 17	Chr08	21319074	21320586	+	1513	1347	990	3	329	36.454	-8	4.72	-0.113	1	PF00141 (1);		AT2G22420.1	99	0	75
		Gorai.007G234600	WGD/segmental	Peroxidase 17	Chr07	30577347	30580341	+	2995	1460	972	3	323	35.637	-9	4.659	-0.068	1	PF00141 (1);		AT2G22420.1	100	0	79
		Gorai.010G131800	Dispersed	Peroxidase 12	Chr10	28981956	28985381	+	3426	1328	1050	3	349	37.903	7	8.386	-0.118	1	PF00141 (1);		AT1G71695.1	98	1e-162	64
		Gorai.005G077600	Dispersed	Peroxidase 12	Chr05	8891396	8894264	+	2869	1450	1116	3	371	40.582	3	7.696	-0.084	1	PF00141 (1);		AT1G71695.1	97	2e-163	63
		Gorai.009G192200	WGD/segmental	Peroxidase 64	Chr09	14789972	14791408	+	1437	1041	951	4	316	34.204	14	9.463	-0.075	1	PF00141 (1);		AT5G42180.1	100	3e-173	72
		Gorai.010G001900	WGD/segmental	Peroxidase 64	Chr10	73452	74986	+	1535	1227	954	4	317	34.322	14.5	9.455	-0.018	1	PF00141 (1);		AT5G42180.1	98	2e-175	74
		Gorai.003G006600	WGD/segmental	Peroxidase 64	Chr03	372535	374039	+	1505	1232	954	4	317	34.25	13	9.272	-0.096	1	PF00141 (1);		AT5G42180.1	97	6e-153	66
		Gorai.012G046400	Dispersed	Peroxidase 47	Chr12	5786828	5788600	-	1773	1189	972	4	323	35.712	-3.5	5.22	-0.161	1	PF00141 (1);		AT4G33420.1	98	2e-176	74
		Gorai.006G074900	WGD/segmental	Peroxidase 24	Chr06	29700116	29703396	-	3281	771	771	3	256	28	9	9.119	-0.243	1	PF00141 (1);		AT2G39040.1	99	4e-94	57
		Gorai.011G184600	Tandem	Peroxidase 24	Chr11	43875274	43877711	-	2438	1243	984	4	327	35.744	18	10.042	-0.087	1	PF00141 (1);		AT2G39040.1	92	2e-108	54
		Gorai.011G184500	WGD/segmental	Peroxidase 24	Chr11	43855155	43856741	-	1587	1218	993	4	330	36.085	11	8.984	-0.053	1	PF00141 (1);		AT2G39040.1	92	3e-112	54
		Gorai.008G007500	Tandem	Peroxidase 3	Chr08	882361	883681	-	1321	1075	972	4	323	35.334	5.5	7.907	-0.126	1	PF00141 (1);		AT1G05260.1	96	9e-115	53
		Gorai.008G007600	Tandem	Peroxidase 56	Chr08	898587	899855	-	1269	972	972	4	323	35.076	-0.5	6.349	-0.005	1	PF00141 (1);		AT5G15180.1	93	2e-116	56
		Gorai.008G007700	Tandem	Peroxidase 3	Chr08	904394	905787	-	1394	1145	972	4	323	35.64	12.5	8.99	-0.186	1	PF00141 (1);		AT1G05260.1	96	1e-119	55
		Gorai.008G172200	WGD/segmental	Peroxidase 27	Chr08	44722321	44724384	-	2064	1425	1023	4	340	37.094	15.5	9.362	-0.072	1	PF00141 (1);		AT3G01190.1	93	2e-144	61
		Gorai.005G150500	WGD/segmental	Peroxidase 27	Chr05	41752164	41753889	+	1726	1262	987	4	328	35.929	15	9.328	-0.08	1	PF00141 (1);		AT3G01190.1	97	2e-142	62
		Gorai.013G099400	WGD/segmental	Peroxidase 3	Chr13	17901788	17903697	+	1910	1353	978	4	325	34.915	1	6.765	0.027	1	PF00141 (1);		AT1G05260.1	97	8e-159	66
		Gorai.013G099500	Tandem	Peroxidase 3	Chr13	17916399	17917578	-	1180	715	618	5	205	21.902	1	6.769	0.369	1	PF00141 (1);		AT1G05260.1	95	2e-95	67
		Gorai.013G099600	Tandem	Peroxidase 3	Chr13	17919161	17920721	+	1561	1285	987	4	328	35.464	3	7.406	0.012	1	PF00141 (1);		AT1G05260.1	97	5e-162	67
		Gorai.005G150600	WGD/segmental	Peroxidase 3	Chr05	41845848	41847613	+	1766	1510	984	4	327	35.417	3.5	7.718	-0.098	1	PF00141 (1);		AT1G05260.1	97	4e-159	67
		Gorai.001G039200	WGD/segmental	Peroxidase 46	Chr01	3653692	3655335	+	1644	1288	1026	4	341	36.937	-9.5	4.661	0.009	1	PF00141 (1);		AT2G24800.1	88	8e-150	68
		Gorai.009G064700	WGD/segmental	Peroxidase 18	Chr09	4599586	4601450	+	1865	1397	1002	4	333	36.144	-5	5.049	-0.072	1	PF00141 (1);		AT2G24800.1	91	1e-146	66
		Gorai.011G069800	Dispersed	Peroxidase 7	Chr11	6245706	6246906	-	1201	1038	1038	3	345	38.216	-2.5	6.118	-0.124	1	PF00141 (1);		AT1G30870.1	87	1e-124	59
	G. hirsutum	Gh_A04G0639	WGD/segmental	Peroxidase 21	A04	44156365	44158523	+	2159	990	990	5	329	37.279	4.5	7.268	-0.261	1	PF00141 (1);		AT2G37130.1	93	6e-164	70
		Gh_D04G1101	WGD/segmental	Peroxidase 21	D04	36441991	36444139	+	2149	987	987	5	328	37.18	1.5	6.725	-0.279	1	PF00141 (1);		AT2G37130.1	93	8e-166	70
		Gh_A09G1415	WGD/segmental	Peroxidase 21	A09	67412511	67414343	+	1833	990	990	5	329	37.119	0.5	6.576	-0.312	1	PF00141 (1);		AT2G37130.1	92	2e-178	76
		Gh_D09G1420	WGD/segmental	Peroxidase 21	D09	41767263	41769101	+	1839	987	987	5	328	36.914	-1.5	6.283	-0.305	1	PF00141 (1);		AT2G37130.1	93	8e-180	76
		Gh_A05G1452	WGD/segmental	Peroxidase 42	A05	15020810	15022360	-	1551	999	999	4	332	37.654	10.5	8.541	-0.361	1	PF00141 (1);		AT4G21960.1	99	0	82
		Gh_D05G1626	WGD/segmental	Peroxidase 42	D05	14640100	14641647	-	1548	999	999	4	332	37.645	10.5	8.541	-0.361	1	PF00141 (1);		AT4G21960.1	99	0	82
		Gh_A12G2370	WGD/segmental	Peroxidase 66	A12	86207288	86208988	-	1701	972	972	3	323	35.625	10.5	8.881	-0.141	1	PF00141 (1);		AT5G51890.1	97	1e-171	72
		Gh_D12G2504	WGD/segmental	Peroxidase 66	D12	57927732	57929447	-	1716	972	972	3	323	35.478	9.5	8.716	-0.139	1	PF00141 (1);		AT5G51890.1	98	2e-174	72
		Gh_A10G1537	WGD/segmental	Peroxidase 29	A10	84415649	84417960	+	2312	972	972	3	323	35.585	9.5	8.641	-0.074	1	PF00141 (1);		AT3G17070.1	93	9e-117	54
		Gh_D10G1784	WGD/segmental	Peroxidase 29	D10	50389073	50391342	+	2270	972	972	3	323	35.639	10.5	8.798	-0.079	1	PF00141 (1);		AT3G17070.1	93	3e-116	54
		Gh_A05G1479	Dispersed	Peroxidase 29	A05	15196748	15197863	+	1116	1011	1011	2	336	36.816	6	8.25	-0.13	1	PF00141 (1);		AT3G17070.1	97	9e-94	46
		Gh_A09G2396	WGD/segmental	Peroxidase 65	scaffold2299_A09	35011	35983	+	973	906	906	2	301	33.439	7	8.459	-0.066	2	PF00141 (2);		AT5G47000.1	96	2e-95	48
		Gh_D09G1611	WGD/segmental	Peroxidase 65	D09	43695508	43696494	-	987	987	987	1	328	36.128	1	6.761	-0.084	1	PF00141 (1);		AT5G47000.1	97	1e-132	59
		Gh_A12G2508	WGD/segmental	Peroxidase 31	A12	87451770	87452774	-	1005	1005	1005	1	334	37.166	4	7.729	-0.111	1	PF00141 (1);		AT3G28200.1	92	5e-140	60
		Gh_D12G2635	WGD/segmental	Peroxidase 31	D12	59085174	59086178	-	1005	1005	1005	1	334	37.193	5	7.988	-0.084	1	PF00141 (1);		AT3G28200.1	92	6e-139	60
		Gh_Sca005203G01	Dispersed	Peroxidase 65	scaffold5203	11694	12068	+	375	375	375	1	124	13.674	0.5	7.081	0.315	1	PF00141 (1);		AT5G47000.1	98	3e-42	55
		Gh_A07G1997	WGD/segmental	Peroxidase 63	A07	76170501	76172204	-	1704	1026	1026	2	341	37.64	7	8.372	-0.117	1	PF00141 (1);		AT5G40150.1	88	8e-164	70
		Gh_D07G2217	WGD/segmental	Peroxidase 63	D07	53125200	53126909	-	1710	1026	1026	2	341	37.69	7	8.372	-0.104	1	PF00141 (1);		AT5G40150.1	88	1e-163	70
		Gh_A05G3141	WGD/segmental	Peroxidase 31	A05	81059455	81060420	+	966	966	966	1	321	35.473	9.5	8.858	-0.225	1	PF00141 (1);		AT3G28200.1	93	3e-161	70
		Gh_D01G1310	Proximal	Peroxidase 65	D01	36863811	36864806	-	996	996	996	1	331	36.892	4.5	8.188	-0.091	1	PF00141 (1);		AT5G47000.1	99	6e-134	56
		Gh_D01G1317	Proximal	Peroxidase 65	D01	37193921	37194913	+	993	993	993	1	330	36.674	3	7.96	NA	1	PF00141 (1);		AT5G47000.1	99	5e-130	55
		Gh_Sca005203G02	Dispersed	Peroxidase 6	scaffold5203	12082	12672	+	591	591	591	1	196	22.119	4.5	8.789	-0.404	1	PF00141 (1);		AT1G24110.1	98	3e-72	59
		Gh_Sca007173G01	Dispersed	Peroxidase 31	scaffold7173	8026	8850	+	825	825	825	1	275	30.205	0.5	6.743	0.069	1	PF00141 (1);		AT3G28200.1	93	4e-107	55
		Gh_A08G0346	WGD/segmental	Peroxidase 39	A08	4289296	4289624	+	329	243	243	2	80	8.534	5	8.628	0.789	1	PF00141 (1);		AT4G11290.1	88	2e-20	54
		Gh_D04G0736	Tandem	Peroxidase 51	D04	15164304	15164597	-	294	294	294	1	97	10.72	-2.5	4.802	-0.214	1	PF00141 (1);		AT4G37530.1	91	4e-38	64
		Gh_A04G1322	Dispersed	Peroxidase 52	scaffold765_A04	11863	12373	+	511	399	399	2	133	14.158	1	7.21	0.345	1	PF00141 (1);		AT5G05340.1	86	3e-53	71
		Gh_D08G0891	WGD/segmental	Peroxidase 45	D08	17239946	17243332	+	3387	780	780	3	259	28.635	11.5	9.787	-0.154	2	PF00141 (2);		AT4G30170.1	91	4e-97	52
		Gh_A08G0747	WGD/segmental	Peroxidase 16	A08	24039157	24042529	+	3373	990	990	4	329	36.303	20	10.429	-0.198	1	PF00141 (1);		AT2G18980.1	100	1e-179	76
		Gh_A10G0810	WGD/segmental	Peroxidase 51	A10	16610264	16611518	-	1255	993	993	4	330	35.908	18	9.883	-0.11	1	PF00141 (1);		AT4G37530.1	93	8e-163	69
		Gh_D10G0951	WGD/segmental	Peroxidase 51	D10	12771913	12773186	+	1274	993	993	4	330	36.006	19	9.99	-0.175	1	PF00141 (1);		AT4G37530.1	93	4e-164	69
		Gh_A02G1466	WGD/segmental	Peroxidase 73	A02	80770103	80772880	-	2778	993	993	4	330	36.013	13.5	9.436	-0.139	1	PF00141 (1);		AT5G67400.1	100	6e-179	71
		Gh_D03G0246	WGD/segmental	Peroxidase 73	D03	2618435	2620271	+	1837	993	993	4	330	35.981	13.5	9.443	-0.134	1	PF00141 (1);		AT5G67400.1	100	5e-180	71
		Gh_Sca196880G01	Dispersed	Peroxidase 73	scaffold196880	85	234	+	150	150	150	1	50	5.173	-0.5	5.673	-0.458	1	PF00141 (1);		AT5G67400.1	100	4e-24	82
		Gh_A12G0695	WGD/segmental	Peroxidase 51	A12	26988350	26989090	+	741	561	561	3	186	20.481	0.5	6.662	-0.125	1	PF00141 (1);		AT4G37530.1	100	3e-86	65
		Gh_D12G0699	WGD/segmental	Peroxidase 51	D12	15282699	15283971	+	1273	993	993	4	330	35.769	8	8.489	-0.086	1	PF00141 (1);		AT4G37530.1	93	3e-178	76
		Gh_A05G2945	WGD/segmental	Peroxidase 55	A05	72277688	72279245	-	1558	972	972	3	323	35.193	-7.5	4.674	-0.032	1	PF00141 (1);		AT5G14130.1	97	9e-143	65
		Gh_A07G2109	WGD/segmental	Peroxidase 55	A07	77657753	77658858	+	1106	966	966	3	321	34.92	-15.5	4.265	-0.079	1	PF00141 (1);		AT5G14130.1	98	3e-137	61
		Gh_D07G2320	WGD/segmental	Peroxidase 55	D07	54647068	54648167	+	1100	966	966	3	321	35.071	-13.5	4.345	-0.101	1	PF00141 (1);		AT5G14130.1	98	3e-136	60
		Gh_A07G2110	Tandem	Peroxidase 55	A07	77659654	77660804	+	1151	975	975	3	324	35.421	2.5	7.682	-0.046	1	PF00141 (1);		AT5G14130.1	98	1e-146	63
		Gh_D07G2321	WGD/segmental	Peroxidase 55	D07	54648867	54650018	+	1152	975	975	3	324	35.389	1.5	7.245	-0.054	1	PF00141 (1);		AT5G14130.1	98	3e-145	63
		Gh_D04G0735	WGD/segmental	Peroxidase 45	D04	15156949	15158096	-	1148	972	972	3	323	35.402	8.5	8.637	-0.048	1	PF00141 (1);		AT4G30170.1	93	7e-142	63
		Gh_A07G0012	WGD/segmental	Peroxidase 45	A07	136360	137613	-	1254	996	996	4	331	36.449	16.5	9.581	-0.08	1	PF00141 (1);		AT4G30170.1	92	4e-154	67
		Gh_D07G0019	WGD/segmental	Peroxidase 45	D07	200078	201330	-	1253	996	996	4	331	36.415	13.5	9.106	-0.078	1	PF00141 (1);		AT4G30170.1	92	5e-156	68
		Gh_Sca139665G01	Dispersed	Peroxidase 45	scaffold139665	40	309	+	270	270	270	1	89	9.953	2	9.213	-0.188	1	PF00141 (1);		AT4G30170.1	97	8e-34	65
		Gh_A05G1328	WGD/segmental	Peroxidase 19	A05	13602610	13604358	+	1749	1053	1053	3	350	38.228	16	9.51	-0.014	1	PF00141 (1);		AT2G34060.1	97	1e-166	65
		Gh_D05G1498	WGD/segmental	Peroxidase 19	D05	13463061	13464814	+	1754	1059	1059	3	352	38.362	17	9.632	0.001	1	PF00141 (1);		AT2G34060.1	97	2e-167	65
		Gh_A11G2043	WGD/segmental	Peroxidase 44	A11	63260806	63261288	-	483	483	483	1	160	17.101	-3	4.889	0.008	1	PF00141 (1);		AT4G26010.1	97	2e-53	56
		Gh_D11G2348	WGD/segmental	Peroxidase 44	D11	45744028	45745072	-	1045	957	957	2	318	35.104	17	10.501	-0.047	1	PF00141 (1);		AT4G26010.1	97	1e-125	59
		Gh_A08G1950	WGD/segmental	Peroxidase 57	A08	100557586	100558616	+	1031	951	951	2	316	34.472	14	9.766	-0.112	1	PF00141 (1);		AT5G17820.1	98	2e-131	59
		Gh_D08G2330	WGD/segmental	Peroxidase 57	D08	63032857	63033881	+	1025	945	945	2	314	34.213	12	9.444	-0.097	1	PF00141 (1);		AT5G17820.1	99	5e-131	58
		Gh_A05G0661	WGD/segmental	Peroxidase 60	A05	6938388	6950337	-	11950	1014	1014	4	337	36.162	0.5	6.731	0.082	1	PF00141 (1);		AT5G22410.1	93	1e-114	55
		Gh_D05G0807	WGD/segmental	Peroxidase 60	D05	6771535	6772831	-	1297	1014	1014	4	337	36.094	0.5	6.732	0.069	1	PF00141 (1);		AT5G22410.1	93	5e-116	56
		Gh_A02G0927	WGD/segmental	Probable peroxidase 61	A02	35288344	35290345	-	2002	1020	1020	4	339	37.959	7	8.299	-0.254	1	PF00141 (1);		AT5G24070.1	97	4e-179	71
		Gh_D02G1110	WGD/segmental	Probable peroxidase 61	D02	31109209	31111160	-	1952	1020	1020	4	339	37.905	8	8.452	-0.25	1	PF00141 (1);		AT5G24070.1	97	0	72
		Gh_A01G1487	WGD/segmental	Peroxidase 43	A01	90340312	90341927	-	1616	972	972	4	323	34.892	-2.5	5.693	0.048	1	PF00141 (1);		AT4G25980.1	98	1e-170	73
		Gh_D01G1726	WGD/segmental	Peroxidase 43	D01	53949584	53951128	-	1545	972	972	4	323	34.892	-3.5	5.396	0.046	1	PF00141 (1);		AT4G25980.1	95	5e-170	74
		Gh_A05G2347	Dispersed	Peroxidase 43	A05	28700915	28701560	-	646	480	480	3	159	16.901	-4	4.868	0.28	1	PF00141 (1);		AT4G25980.1	97	5e-69	68
		Gh_Sca085725G01	Dispersed	Peroxidase 52	scaffold85725	242	427	-	186	186	186	1	61	6.553	0	6.496	-0.115	NA	-		AT5G05340.1	100	7e-26	74
		Gh_A11G2169	Dispersed	Peroxidase 43	A11	72084790	72085435	+	646	480	480	3	159	16.906	-3	5.116	0.269	1	PF00141 (1);		AT4G25980.1	97	3e-71	69
		Gh_D03G0641	Proximal	Peroxidase 43	D03	19207034	19208004	-	971	699	699	4	232	25.142	8	8.873	0.107	2	PF00141 (2);		AT4G25980.1	99	2e-76	51
		Gh_A02G1203	Dispersed	Peroxidase 43	A02	69325920	69327130	-	1211	984	984	4	327	35.325	4.5	8.199	-0.046	1	PF00141 (1);		AT4G25980.1	99	2e-134	56
		Gh_D03G0643	Proximal	Peroxidase 43	D03	19586975	19587944	+	970	657	657	4	218	23.823	7.5	9.034	0.011	1	PF00141 (1);		AT4G25980.1	99	7e-73	50
		Gh_A05G0093	WGD/segmental	Peroxidase 25	A05	1157788	1159020	+	1233	963	963	4	320	34.922	2.5	7.339	-0.079	1	PF00141 (1);		AT2G41480.1	99	7e-158	66
		Gh_D05G0154	WGD/segmental	Peroxidase 25	D05	1545607	1546840	+	1234	978	978	4	325	35.03	4.5	7.992	-0.104	1	PF00141 (1);		AT2G41480.1	99	2e-176	71
		Gh_A08G2028	WGD/segmental	Peroxidase 53	A08	101461027	101462441	-	1415	969	969	4	322	34.951	4.5	7.753	-0.106	1	PF00141 (1);		AT5G06720.1	98	5e-130	58
		Gh_D08G2420	WGD/segmental	Peroxidase 53	D08	64145436	64146846	-	1411	969	969	4	322	34.915	4.5	7.753	-0.087	1	PF00141 (1);		AT5G06720.1	98	2e-130	58
		Gh_A11G3132	Dispersed	Peroxidase 53	scaffold2818_A11	6967	8208	+	1242	966	966	4	321	34.968	5	7.998	-0.038	1	PF00141 (1);		AT5G06720.1	98	2e-126	57
		Gh_D11G2183	Dispersed	Peroxidase 53	D11	34071064	34072304	+	1241	966	966	4	321	34.897	4	7.736	-0.073	1	PF00141 (1);		AT5G06720.1	98	2e-130	58
		Gh_A09G1202	WGD/segmental	Peroxidase 53	A09	63774095	63775448	+	1354	1020	1020	4	339	36.005	-2.5	5.236	-0.042	1	PF00141 (1);		AT5G06720.1	94	0	77
		Gh_D09G1208	WGD/segmental	Peroxidase 53	D09	39009612	39010932	+	1321	1020	1020	4	339	35.973	-3.5	4.952	-0.041	1	PF00141 (1);		AT5G06720.1	94	0	78
		Gh_A08G0712	WGD/segmental	Peroxidase 54	A08	18361761	18367521	+	5761	1056	1056	4	351	38.198	-6.5	4.881	0.079	1	PF00141 (1);		AT5G06730.1	88	2e-120	56
		Gh_A04G1453	Dispersed	Peroxidase 10	scaffold1017_A04	7944	10075	-	2132	1020	1020	4	339	37.62	4	7.729	-0.08	1	PF00141 (1);		AT1G49570.1	99	4e-154	63
		Gh_D04G1593	Dispersed	Peroxidase 10	D04	48023771	48025856	-	2086	1020	1020	4	339	37.391	2	7.06	-0.078	1	PF00141 (1);		AT1G49570.1	99	3e-157	63
		Gh_D12G0853	Dispersed	Peroxidase 10	D12	27599646	27601009	-	1364	1050	1050	4	349	38.707	1	6.761	0.031	1	PF00141 (1);		AT1G49570.1	93	5e-122	56
		Gh_A05G3489	WGD/segmental	Peroxidase 52	A05	90428029	90429659	+	1631	1014	1014	4	337	36.057	13.5	9.569	-0.183	1	PF00141 (1);		AT5G05340.1	90	1e-175	78
		Gh_D04G0130	WGD/segmental	Peroxidase 52	D04	1796590	1798244	-	1655	1014	1014	4	337	36.038	11.5	9.223	-0.21	1	PF00141 (1);		AT5G05340.1	90	2e-176	79
		Gh_A13G0039	WGD/segmental	Peroxidase 52	A13	393916	396005	+	2090	978	978	4	325	35.413	12.5	9.015	-0.161	1	PF00141 (1);		AT5G05340.1	92	5e-166	76
		Gh_D07G1630	Dispersed	Peroxidase 70	D07	32393320	32394431	-	1112	939	939	3	312	34.233	13.5	9.889	-0.102	1	PF00141 (1);		AT5G05340.1	92	1e-108	55
		Gh_A02G0542	WGD/segmental	Peroxidase 40	A02	8131024	8132267	+	1244	1002	1002	4	333	36.126	-18.5	4.118	0.041	1	PF00141 (1);		AT4G16270.1	90	1e-140	65
		Gh_D02G0606	WGD/segmental	Peroxidase 40	D02	8255229	8256474	+	1246	1014	1014	4	337	36.651	-18.5	4.134	0.077	1	PF00141 (1);		AT4G16270.1	91	1e-142	66
		Gh_A11G0400	WGD/segmental	Peroxidase 72	A11	3718938	3720282	-	1345	996	996	4	331	36.509	14.5	9.369	-0.26	1	PF00141 (1);		AT5G66390.1	98	0	77
		Gh_D11G0463	WGD/segmental	Peroxidase 72	D11	3963558	3964899	-	1342	996	996	4	331	36.567	13.5	9.222	-0.269	1	PF00141 (1);		AT5G66390.1	98	0	78
		Gh_A11G0523	WGD/segmental	Peroxidase 72	A11	4917637	4918870	+	1234	927	927	4	308	34.883	13.5	9.729	-0.359	1	PF00141 (1);		AT5G66390.1	99	6e-146	63
		Gh_D11G0607	WGD/segmental	Peroxidase 72	D11	5302020	5303236	+	1217	978	978	4	325	36.121	11.5	8.954	-0.257	1	PF00141 (1);		AT5G66390.1	94	0	77
		Gh_A11G1669	WGD/segmental	Peroxidase 72	A11	25291980	25293232	-	1253	1005	1005	4	334	36.929	9.5	8.456	-0.214	1	PF00141 (1);		AT5G66390.1	99	0	78
		Gh_D11G1824	WGD/segmental	Peroxidase 72	D11	20830683	20831933	-	1251	969	969	4	322	35.543	9.5	8.456	-0.208	1	PF00141 (1);		AT5G66390.1	99	0	74
		Gh_A05G1635	WGD/segmental	Peroxidase 9	A05	16892245	16893617	+	1373	1050	1050	4	349	37.729	3	7.696	-0.037	1	PF00141 (1);		AT1G44970.1	100	0	75
		Gh_D05G1817	WGD/segmental	Peroxidase 9	D05	16541131	16542504	+	1374	1050	1050	4	349	37.753	3	7.696	-0.042	1	PF00141 (1);		AT1G44970.1	100	0	75
		Gh_A12G1915	WGD/segmental	Peroxidase 20	A12	81887117	81888429	-	1313	1014	1014	4	337	37.912	-2	6.002	-0.023	1	PF00141 (1);		AT2G35380.1	98	2e-164	67
		Gh_D12G2095	WGD/segmental	Peroxidase 20	D12	53969820	53971114	-	1295	1002	1002	4	333	37.488	-4	5.481	-0.037	1	PF00141 (1);		AT2G35380.1	99	1e-166	67
		Gh_A03G0944	WGD/segmental	Peroxidase 11	A03	60522384	60523564	+	1181	1008	1008	3	335	36.753	-5	5.188	0.05	1	PF00141 (1);		AT1G68850.1	97	5e-180	73
		Gh_D02G1327	WGD/segmental	Peroxidase 11	D02	43855329	43856508	+	1180	1008	1008	3	335	36.753	-4	5.381	0.047	1	PF00141 (1);		AT1G68850.1	97	9e-179	73
		Gh_A12G2622	Dispersed	Peroxidase 11	scaffold3385_A12	49766	51061	-	1296	1011	1011	4	336	37.078	-5.5	5.049	0.004	1	PF00141 (1);		AT1G68850.1	90	2e-170	71
		Gh_D12G1577	WGD/segmental	Peroxidase 11	D12	46856738	46864694	-	7957	1803	1803	9	600	68.103	1.5	6.768	0.077	2	PF03798 (1); PF00141 (1);		AT1G68850.1	51	5e-168	72
		Gh_A12G0795	WGD/segmental	Peroxidase 17	A12	45775138	45776292	-	1155	1068	1068	2	355	39.804	-5	5.12	-0.084	1	PF00141 (1);		AT2G22420.1	99	3e-176	68
		Gh_D12G0788	WGD/segmental	Peroxidase 17	D12	22644947	22646101	-	1155	1068	1068	2	355	39.645	-7	4.904	-0.056	1	PF00141 (1);		AT2G22420.1	99	5e-179	69
		Gh_A11G1859	WGD/segmental	Peroxidase 17	A11	45617267	45622682	-	5416	930	930	3	309	34.02	-8	4.719	-0.149	1	PF00141 (1);		AT2G22420.1	100	0	81
		Gh_D11G2151	WGD/segmental	Peroxidase 17	D11	32727567	32730117	-	2551	972	972	3	323	35.508	-9	4.659	-0.066	1	PF00141 (1);		AT2G22420.1	100	0	79
		Gh_A06G1006	WGD/segmental	Peroxidase 12	A06	49554553	49556908	+	2356	987	987	4	328	35.725	5	8.27	-0.081	1	PF00141 (1);		AT1G71695.1	98	2e-143	60
		Gh_D06G1200	WGD/segmental	Peroxidase 12	D06	30337737	30340827	+	3091	1050	1050	3	349	37.913	7	8.386	-0.12	1	PF00141 (1);		AT1G71695.1	98	1e-163	64
		Gh_A02G0651	WGD/segmental	Peroxidase 12	A02	10404884	10407370	+	2487	1029	1029	4	342	37.147	-4	5.162	-0.01	1	PF00141 (1);		AT1G71695.1	90	2e-152	68
		Gh_D02G0695	WGD/segmental	Peroxidase 12	D02	9863175	9865761	+	2587	1116	1116	3	371	40.616	3	7.696	-0.087	1	PF00141 (1);		AT1G71695.1	97	4e-164	63
		Gh_A05G1577	WGD/segmental	Peroxidase 64	A05	16171654	16172991	+	1338	951	951	4	316	34.184	15	9.504	-0.09	1	PF00141 (1);		AT5G42180.1	100	4e-175	73
		Gh_D05G1755	WGD/segmental	Peroxidase 64	D05	15837493	15838825	+	1333	951	951	4	316	34.216	14	9.47	-0.075	1	PF00141 (1);		AT5G42180.1	100	2e-172	71
		Gh_A06G0019	WGD/segmental	Peroxidase 64	A06	84546	85807	+	1262	954	954	4	317	34.22	13.5	9.283	-0.001	1	PF00141 (1);		AT5G42180.1	94	1e-173	76
		Gh_A02G1663	WGD/segmental	Peroxidase 64	A02	82988074	82989301	-	1228	954	954	4	317	34.25	13	9.272	-0.096	1	PF00141 (1);		AT5G42180.1	97	6e-153	66
		Gh_D03G0059	WGD/segmental	Peroxidase 64	D03	390493	391719	+	1227	954	954	4	317	34.264	13	9.272	-0.097	1	PF00141 (1);		AT5G42180.1	97	2e-152	66
		Gh_A05G3239	Dispersed	Peroxidase 47	A05	84740299	84741875	+	1577	972	972	4	323	35.822	-4.5	5.064	-0.159	1	PF00141 (1);		AT4G33420.1	98	6e-176	75
		Gh_A09G0591	WGD/segmental	Peroxidase 24	A09	48054359	48058181	-	3823	777	777	4	258	28.277	7	8.82	-0.234	1	PF00141 (1);		AT2G39040.1	99	5e-94	56
		Gh_D09G0590	WGD/segmental	Peroxidase 24	D09	28473937	28477562	-	3626	990	990	4	329	36.599	16	9.743	-0.132	1	PF00141 (1);		AT2G39040.1	92	7e-114	55
		Gh_A10G2288	WGD/segmental	Peroxidase 24	scaffold2473_A10	1167442	1169647	+	2206	984	984	4	327	35.774	18	10.029	-0.108	1	PF00141 (1);		AT2G39040.1	92	8e-109	54
		Gh_D10G1644	Tandem	Peroxidase 24	D10	45445937	45448111	-	2175	984	984	4	327	35.716	18	10.042	-0.087	1	PF00141 (1);		AT2G39040.1	92	6e-109	54
		Gh_A10G2290	Proximal	Peroxidase 24	scaffold2473_A10	1189614	1190983	+	1370	993	993	4	330	36.024	9.5	8.943	-0.032	1	PF00141 (1);		AT2G39040.1	92	4e-111	54
		Gh_D10G1643	WGD/segmental	Peroxidase 24	D10	45423530	45424891	-	1362	993	993	4	330	36.093	11	8.984	-0.064	1	PF00141 (1);		AT2G39040.1	92	3e-112	55
		Gh_A12G0055	WGD/segmental	Peroxidase 3	A12	735887	756659	-	20773	972	972	4	323	35.302	7	8.259	-0.134	1	PF00141 (1);		AT1G05260.1	98	3e-116	54
		Gh_D12G0069	WGD/segmental	Peroxidase 3	D12	815867	853649	-	37783	1764	1764	7	587	64.163	6.5	7.561	-0.153	2	PF00141 (2);		AT1G05260.1	53	2e-111	53
		Gh_D12G0071	Tandem	Peroxidase 3	D12	866590	867867	-	1278	1029	1029	4	342	37.722	12.5	8.99	-0.144	1	PF00141 (1);		AT1G05260.1	91	3e-121	56
		Gh_A12G0056	Tandem	Peroxidase 3	A12	760206	761426	-	1221	972	972	4	323	35.561	12.5	8.99	-0.191	1	PF00141 (1);		AT1G05260.1	96	7e-119	55
		Gh_D12G0070	Tandem	Peroxidase 3	D12	860573	861841	-	1269	972	972	4	323	35.068	0	6.499	-0.006	1	PF00141 (1);		AT1G05260.1	98	7e-117	54
		Gh_D12G0072	Tandem	Peroxidase 3	D12	876401	877438	-	1038	789	789	4	262	28.842	4.5	8.056	-0.219	1	PF00141 (1);		AT1G05260.1	100	1e-107	60
		Gh_A12G1441	WGD/segmental	Peroxidase 27	A12	73250331	73252001	-	1671	1023	1023	4	340	37.164	15.5	9.362	-0.036	1	PF00141 (1);		AT3G01190.1	93	3e-144	61
		Gh_D12G1559	WGD/segmental	Peroxidase 27	D12	46570546	46572226	-	1681	1023	1023	4	340	37.114	15.5	9.362	-0.078	1	PF00141 (1);		AT3G01190.1	91	4e-144	62
		Gh_A03G0960	WGD/segmental	Peroxidase 3	A03	61923097	61977652	+	54556	1971	1971	8	656	71.655	18.5	8.682	-0.072	2	PF00141 (2);		AT1G05260.1	48	2e-153	67
		Gh_D02G1345	WGD/segmental	Peroxidase 27	D02	44875923	44877373	+	1451	990	990	4	329	36.188	14	9.182	-0.135	1	PF00141 (1);		AT3G01190.1	97	1e-141	63
		Gh_A13G0772	WGD/segmental	Peroxidase 3	A13	33291935	33293456	+	1522	975	975	4	324	34.893	0.5	6.653	0.013	1	PF00141 (1);		AT1G05260.1	98	1e-157	65
		Gh_D13G0906	WGD/segmental	Peroxidase 3	D13	18641774	18643302	+	1529	978	978	4	325	34.945	1	6.765	0.035	1	PF00141 (1);		AT1G05260.1	97	2e-158	66
		Gh_A13G0773	WGD/segmental	Peroxidase 3	A13	33310901	33312163	-	1263	987	987	4	328	35.413	2.5	7.363	0	1	PF00141 (1);		AT1G05260.1	97	5e-158	66
		Gh_D13G0907	WGD/segmental	Peroxidase 3	D13	18659873	18661135	-	1263	987	987	4	328	35.464	3	7.406	0.012	1	PF00141 (1);		AT1G05260.1	97	3e-161	66
		Gh_A13G0774	WGD/segmental	Peroxidase 3	A13	33316160	33317123	+	964	696	696	3	231	25.032	3	8.036	0.064	2	PF00141 (2);		AT1G05260.1	54	1e-54	64
		Gh_D13G0909	Proximal	Peroxidase 3	D13	18677172	18678434	+	1263	987	987	4	328	35.491	3	7.406	0.004	1	PF00141 (1);		AT1G05260.1	97	2e-161	66
		Gh_D02G1346	WGD/segmental	Peroxidase 3	D02	44991381	44992620	+	1240	984	984	4	327	35.431	3.5	7.718	-0.098	1	PF00141 (1);		AT1G05260.1	97	6e-159	67
		Gh_A07G0275	WGD/segmental	Peroxidase 46	A07	3399593	3400898	+	1306	996	996	4	331	35.82	-7.5	4.818	-0.023	1	PF00141 (1);		AT2G24800.1	91	2e-149	68
		Gh_D07G0331	WGD/segmental	Peroxidase 46	D07	3515650	3516955	+	1306	996	996	4	331	35.856	-9.5	4.661	-0.024	1	PF00141 (1);		AT2G24800.1	91	8e-150	68
		Gh_A05G0507	WGD/segmental	Peroxidase 18	A05	5454946	5456283	+	1338	999	999	4	332	36.134	-5	5.049	-0.056	1	PF00141 (1);		AT2G24800.1	91	3e-148	66
		Gh_D05G0626	WGD/segmental	Peroxidase 18	D05	5026931	5028271	+	1341	1002	1002	4	333	36.144	-5	5.049	-0.072	1	PF00141 (1);		AT2G24800.1	91	1e-146	66
		Gh_A10G0565	WGD/segmental	Peroxidase 7	A10	7031511	7032708	-	1198	1041	1041	3	346	38.287	-2.5	6.034	-0.11	1	PF00141 (1);		AT1G30870.1	88	5e-125	59
		Gh_D10G0605	WGD/segmental	Peroxidase 7	D10	6317691	6318891	-	1201	1041	1041	3	346	38.31	-2.5	6.118	-0.101	1	PF00141 (1);		AT1G30870.1	87	4e-123	59
*inculding five different type: (1)Singleton: no gene duplication events within genome;(2)Dispersed: dispersed duplications;(3)Proxima: proxima duplications;(4)Tandem: tandem duplications;(5)WGD/segmental: whole genome duplications or segmental duplications.
