# Supplementary material for: Deep Transcriptome Analysis Reveals Reactive Oxygen Species (ROS) Network Evolution, Response to Abiotic Stress, and Regulation of Fiber Development in Cotton
Source: Int J Mol Sci. 2019 Apr 15;20(8):1863. doi: 10.3390/ijms20081863 (PMC6514600; doi:10.3390/ijms20081863)
Supplement: Supplementary file 1 [file ijms-20-01863-s001.zip › Supplementary files/Table S2.xlsx]

## Sheet: Sheet1
Table S2: Synteny blocks of G.hirsutum and diploid cotton (G. arboreum and G. raimondii)
Synteny block between A-subgenome and A-genome				Synteny block between D-subgenome and A-genome				Synteny block between A-subgenome and D-genome				Synteny block between D-subgenome and D-genome				Synteny block between D-subgenome and A-genome
Block	Gene Order	Gene ID	Gene ID	Block	Gene Order	Gene ID	Gene ID	Block	Gene Order	Gene ID	Gene ID	Block	Gene Order	Gene ID	Gene ID	Block	Gene Order	Gene ID	Gene ID
1	1	Cotton_A_28649	Gh_A02G1698	110	34	Cotton_A_01533	Gh_D03G0059	0	7	Gorai.002G061800.2	Gh_A01G0392	415	3	Gorai.001G274800.1	Gh_D04G0715	0	121	Cotton_A_05673	Gorai.001G017400.1
2	31	Cotton_A_01533	Gh_A02G1663	110	48	Cotton_A_01547	Gh_D03G0074	0	156	Gorai.002G081800.1	Gh_A01G0565	416	1	Gorai.001G271900.1	Gh_D04G0735	1	91	Cotton_A_03623	Gorai.001G052700.8
2	44	Cotton_A_01547	Gh_A02G1648	113	1	Cotton_A_28649	Gh_D03G0021	0	391	Gorai.002G115900.2	Gh_A01G0845	426	19	Gorai.001G017400.1	Gh_D07G0136	1	97	Cotton_A_03631	Gorai.001G053300.1
3	47	Cotton_A_14014	Gh_A05G0320	117	49	Cotton_A_14014	Gh_D05G0426	0	461	Gorai.002G126200.1	Gh_A01G0925	426	195	Gorai.001G038600.1	Gh_D07G0326	24	2	Cotton_A_30812	Gorai.001G089300.1
11	2	Cotton_A_19224	Gh_A05G0507	128	3	Cotton_A_14014	Gh_D06G0900	0	477	Gorai.002G128200.1	Gh_A01G0943	426	200	Gorai.001G039200.2	Gh_D07G0331	31	0	Cotton_A_28649	Gorai.001G198700.1
15	80	Cotton_A_03623	Gh_A07G0392	132	82	Cotton_A_03623	Gh_D07G0457	1	28	Gorai.002G196800.1	Gh_A01G1388	426	315	Gorai.001G052700.8	Gh_D07G0457	32	56	Cotton_A_05898	Gorai.001G236100.1
15	86	Cotton_A_03631	Gh_A07G0398	132	88	Cotton_A_03631	Gh_D07G0463	1	105	Gorai.002G208800.1	Gh_A01G1487	426	321	Gorai.001G053300.1	Gh_D07G0463	36	5	Cotton_A_19224	Gorai.001G039200.2
16	71	Cotton_A_05673	Gh_A07G0143	133	19	Cotton_A_05673	Gh_D07G0136	1	183	Gorai.002G219700.1	Gh_A01G1577	426	609	Gorai.001G089300.1	Gh_D07G0778	36	11	Cotton_A_19216	Gorai.001G038600.1
43	2	Cotton_A_30812	Gh_A07G0716	160	63	Cotton_A_05898	Gh_D07G2061	1	363	Gorai.002G241300.1	Gh_A01G1777	426	734	Gorai.001G106500.1	Gh_D07G0928	39	9	Cotton_A_19460	Gorai.001G259400.1
45	58	Cotton_A_05898	Gh_A07G1852	164	5	Cotton_A_19224	Gh_D07G0331	1	377	Gorai.002G243200.1	Gh_A01G1793	427	60	Gorai.001G198700.1	Gh_D07G1724	41	15	Cotton_A_22704	Gorai.001G274800.1
49	5	Cotton_A_19224	Gh_A07G0275	164	10	Cotton_A_19216	Gh_D07G0326	2	207	Gorai.002G053700.1	Gh_A01G0370	427	330	Gorai.001G236100.1	Gh_D07G2061	42	12	Cotton_A_24667	Gorai.001G106500.1
49	11	Cotton_A_19216	Gh_A07G0269	166	8	Cotton_A_19460	Gh_D07G2217	23	0	Gorai.009G187600.1	Gh_A01G0845	428	67	Gorai.001G259400.1	Gh_D07G2217	47	8	Cotton_A_28176	Gorai.001G001800.1
51	8	Cotton_A_19460	Gh_A07G1997	169	15	Cotton_A_22704	Gh_D07G2345	38	89	Gorai.003G029000.1	Gh_A02G1466	428	164	Gorai.001G271800.1	Gh_D07G2320	51	4	Cotton_A_28610	Gorai.001G271800.1
52	17	Cotton_A_22704	Gh_A07G2134	171	11	Cotton_A_24667	Gh_D07G0928	38	239	Gorai.003G008200.2	Gh_A02G1648	428	165	Gorai.001G271900.1	Gh_D07G2321	76	33	Cotton_A_01533	Gorai.003G006600.1
55	11	Cotton_A_24667	Gh_A07G0856	177	8	Cotton_A_28176	Gh_D07G0019	38	252	Gorai.003G006600.1	Gh_A02G1663	428	187	Gorai.001G274800.1	Gh_D07G2345	76	46	Cotton_A_01547	Gorai.003G008200.2
62	8	Cotton_A_28176	Gh_A07G0012	187	1	Cotton_A_28610	Gh_D07G2321	38	283	Gorai.003G002800.1	Gh_A02G1698	460	401	Gorai.002G115900.2	Gh_D01G0873	81	1	Cotton_A_28649	Gorai.003G002800.1
64	4	Cotton_A_28610	Gh_A07G2109	210	4	Cotton_A_33880	Gh_D10G1670	41	351	Gorai.005G058500.1	Gh_A02G0461	460	476	Gorai.002G126200.1	Gh_D01G0969	84	1	Cotton_A_03631	Gorai.003G117900.1
93	4	Cotton_A_33879	Gh_A10G1430	288	3	Cotton_A_00532	Gh_D01G2019	41	352	Gorai.005G058600.1	Gh_A02G0462	460	492	Gorai.002G128200.1	Gh_D01G0990	88	4	Cotton_A_14014	Gorai.004G286800.1
241	2	Cotton_A_00532	Gh_A01G1777	288	17	Cotton_A_00515	Gh_D01G2034	41	417	Gorai.005G068200.1	Gh_A02G0542	461	121	Gorai.002G241300.1	Gh_D01G2019	131	47	Cotton_A_14014	Gorai.009G044100.1
241	16	Cotton_A_00515	Gh_A01G1793	288	89	Cotton_A_00425	Gh_D01G2119	41	491	Gorai.005G077600.1	Gh_A02G0651	461	136	Gorai.002G243200.1	Gh_D01G2034	140	3	Cotton_A_19224	Gorai.009G064700.2
249	5	Cotton_A_31285	Gh_A01G1388	297	9	Cotton_A_25132	Gh_D01G1726	41	528	Gorai.005G083300.1	Gh_A02G0699	461	210	Gorai.002G252300.1	Gh_D01G2119	145	13	Cotton_A_14014	Gorai.010G099100.1
252	8	Cotton_A_25132	Gh_A01G1487	326	2	Cotton_A_10151	Gh_D10G2394	43	16	Gorai.005G126200.1	Gh_A02G0927	462	180	Gorai.002G196800.1	Gh_D01G1632	166	4	Cotton_A_33880	Gorai.011G187200.1
257	0	Cotton_A_35618	Gh_A01G1577	407	4	Cotton_A_09755	Gh_D03G0246	61	95	Gorai.003G117900.1	Gh_A03G0476	462	260	Gorai.002G208800.1	Gh_D01G1726	170	4	Cotton_A_28610	Gorai.012G086200.1
283	4	Cotton_A_27460	Gh_A07G1556	410	1	Cotton_A_14514	Gh_D05G0244	65	69	Gorai.005G148900.1	Gh_A03G0944	465	43	Gorai.002G157500.1	Gh_D01G1239	173	2	Cotton_A_22704	Gorai.012G084000.1
284	2	Cotton_A_10151	Gh_A10G2147	419	19	Cotton_A_14514	Gh_D08G2518	65	82	Gorai.005G150500.1	Gh_A03G0960	465	92	Gorai.002G164800.1	Gh_D01G1310	183	3	Cotton_A_27460	Gorai.001G198700.1
329	5	Cotton_A_00425	Gh_A01G2148	428	1	Cotton_A_29727	Gh_D08G2330	65	87	Gorai.005G151400.1	Gh_A03G0969	465	96	Gorai.002G165200.1	Gh_D01G1317	184	3	Cotton_A_00532	Gorai.002G241300.1
335	4	Cotton_A_09755	Gh_A02G1466	430	4	Cotton_A_31123	Gh_D08G1257	65	131	Gorai.005G159300.1	Gh_A03G1037	466	3	Gorai.002G219700.1	Gh_D01G1882	184	17	Cotton_A_00515	Gorai.002G243200.1
341	5	Cotton_A_11881	Gh_A05G0320	435	3	Cotton_A_34665	Gh_D08G1291	65	189	Gorai.005G169900.1	Gh_A03G1112	483	8	Gorai.002G241300.1	Gh_D09G1329	184	90	Cotton_A_00425	Gorai.002G252300.1
349	18	Cotton_A_14514	Gh_A08G2151	435	5	Cotton_A_34669	Gh_D08G1293	65	397	Gorai.005G198800.1	Gh_A03G1365	499	0	Gorai.002G053700.1	Gh_D01G2331	197	9	Cotton_A_25132	Gorai.002G208800.1
350	13	Cotton_A_20155	Gh_A08G2076	439	33	Cotton_A_05819	Gh_D08G2420	66	8	Gorai.005G220400.1	Gh_A03G1526	500	9	Gorai.002G061800.2	Gh_D01G2342	202	0	Cotton_A_35618	Gorai.002G219700.1
363	2	Cotton_A_34664	Gh_A08G1016	440	41	Cotton_A_11881	Gh_D08G2582	66	131	Gorai.005G237300.1	Gh_A03G1663	507	185	Gorai.003G117900.1	Gh_D03G1062	226	3	Cotton_A_00532	Gorai.006G156800.1
363	3	Cotton_A_34665	Gh_A08G1017	440	53	Cotton_A_11865	Gh_D08G2567	66	258	Gorai.005G254100.1	Gh_A03G1812	508	49	Gorai.003G029000.1	Gh_D03G0246	246	2	Cotton_A_10151	Gorai.011G290900.1
363	5	Cotton_A_34669	Gh_A08G1019	442	41	Cotton_A_05103	Gh_D08G2093	67	15	Gorai.005G110000.1	Gh_A03G0712	510	19	Gorai.003G002800.1	Gh_D03G0021	264	4	Cotton_A_09755	Gorai.003G029000.1
365	2	Cotton_A_19545	Gh_A08G0633	444	26	Cotton_A_19545	Gh_D08G1994	70	24	Gorai.005G131500.1	Gh_A03G0807	510	55	Gorai.003G006600.1	Gh_D03G0059	267	2	Cotton_A_31123	Gorai.003G085100.1
366	17	Cotton_A_05819	Gh_A08G2028	498	8	Cotton_A_20155	Gh_D08G2653	81	1	Gorai.012G142200.1	Gh_A03G1527	510	70	Gorai.003G008200.2	Gh_D03G0074	280	20	Cotton_A_14514	Gorai.004G280800.1
367	47	Cotton_A_05103	Gh_A08G1744	597	99	Cotton_A_01150	Gh_D05G0626	91	6	Gorai.006G162600.1	Gh_A04G0602	512	7	Gorai.003G090000.1	Gh_D03G0641	281	12	Cotton_A_20155	Gorai.004G272300.2
368	41	Cotton_A_11881	Gh_A08G2216	606	14	Cotton_A_01150	Gh_D07G0331	96	78	Gorai.009G414400.1	Gh_A04G0602	513	109	Gorai.003G085100.1	Gh_D03G0688	287	1	Cotton_A_29727	Gorai.004G252800.1
368	55	Cotton_A_11865	Gh_A08G2202	614	0	Cotton_A_08283	Gh_D08G0767	96	110	Gorai.009G419100.1	Gh_A04G0639	546	4	Gorai.004G137300.1	Gh_D03G0688	290	4	Cotton_A_31123	Gorai.004G137300.1
369	63	Cotton_A_09913	Gh_A08G1558	621	7	Cotton_A_08285	Gh_D11G1223	98	29	Gorai.009G397800.1	Gh_A04G0493	551	1	Gorai.004G280800.1	Gh_D05G0244	296	3	Cotton_A_34664	Gorai.004G140800.1
373	12	Cotton_A_19545	Gh_A08G1661	621	8	Cotton_A_08284	Gh_D11G1224	103	149	Gorai.012G124500.1	Gh_A04G0859	555	534	Gorai.004G069600.1	Gh_D08G0621	296	4	Cotton_A_34665	Gorai.004G140900.1
510	90	Cotton_A_01150	Gh_A05G0507	621	9	Cotton_A_08283	Gh_D11G1225	103	184	Gorai.012G129200.1	Gh_A04G0896	555	634	Gorai.004G083200.1	Gh_D08G0734	296	6	Cotton_A_34669	Gorai.004G141100.1
533	6	Cotton_A_08285	Gh_A11G1070	622	44	Cotton_A_14678	Gh_D11G1824	103	217	Gorai.012G134400.1	Gh_A04G0936	555	654	Gorai.004G086400.1	Gh_D08G0767	302	33	Cotton_A_05819	Gorai.004G265900.2
533	7	Cotton_A_08284	Gh_A11G1071	642	4	Cotton_A_34146	Gh_D11G2183	103	220	Gorai.012G134800.1	Gh_A04G0941	555	655	Gorai.004G086500.1	Gh_D08G0768	303	68	Cotton_A_09913	Gorai.004G201800.1
533	8	Cotton_A_08283	Gh_A11G1072	663	16	Cotton_A_18118	Gh_D11G2462	105	14	Gorai.012G142200.1	Gh_A04G0970	555	662	Gorai.004G087300.2	Gh_D08G0775	304	47	Cotton_A_05103	Gorai.004G227100.1
534	46	Cotton_A_14678	Gh_A11G1669	665	1	Cotton_A_29320	Gh_D11G2743	112	1	Gorai.001G039200.2	Gh_A05G0507	555	705	Gorai.004G093000.1	Gh_D08G0829	305	43	Cotton_A_11881	Gorai.004G286800.1
568	9	Cotton_A_18127	Gh_A11G2169	666	9	Cotton_A_26565	Gh_D11G1323	114	4	Gorai.001G271800.1	Gh_A05G2945	555	727	Gorai.004G096800.2	Gh_D08G0870	305	56	Cotton_A_11865	Gorai.004G285400.1
568	17	Cotton_A_18118	Gh_A11G2160	673	5	Cotton_A_30716	Gh_D11G2348	116	5	Gorai.001G259400.1	Gh_A05G3141	555	1011	Gorai.004G137300.1	Gh_D08G1257	308	26	Cotton_A_19545	Gorai.004G215500.2
574	11	Cotton_A_26565	Gh_A11G1167	746	3	Cotton_A_00641	Gh_D01G1632	126	1	Gorai.004G286800.1	Gh_A05G0320	555	1043	Gorai.004G140900.1	Gh_D08G1291	317	15	Cotton_A_25978	Gorai.004G211400.2
575	2	Cotton_A_29320	Gh_A11G2426	748	119	Cotton_A_00641	Gh_D02G2245	132	66	Gorai.009G267500.1	Gh_A05G2158	555	1045	Gorai.004G141100.1	Gh_D08G1293	339	1	Cotton_A_23968	Gorai.007G142200.2
586	4	Cotton_A_08285	Gh_A12G0067	750	10	Cotton_A_08729	Gh_D02G0606	132	269	Gorai.009G293300.1	Gh_A05G2383	555	1543	Gorai.004G201800.4	Gh_D08G1865	348	10	Cotton_A_09913	Gorai.007G021300.2
699	11	Cotton_A_08729	Gh_A02G0542	752	29	Cotton_A_29541	Gh_D02G0516	132	285	Gorai.009G295200.1	Gh_A05G2401	555	1622	Gorai.004G211400.2	Gh_D08G1956	357	3	Cotton_A_09755	Gorai.008G080800.1
700	33	Cotton_A_29541	Gh_A02G0461	752	30	Cotton_A_29540	Gh_D02G0517	132	392	Gorai.009G311900.1	Gh_A05G2534	555	1654	Gorai.004G215500.2	Gh_D08G1994	368	4	Cotton_A_25978	Gorai.008G246400.2
700	34	Cotton_A_29540	Gh_A02G0462	756	2	Cotton_A_22835	Gh_D02G1345	132	580	Gorai.009G346700.1	Gh_A05G2809	555	1748	Gorai.004G227100.1	Gh_D08G2093	376	4	Cotton_A_11881	Gorai.009G044100.1
708	26	Cotton_A_19603	Gh_A02G0699	756	3	Cotton_A_22834	Gh_D02G1346	133	35	Gorai.009G165100.1	Gh_A05G1328	555	1749	Gorai.004G227300.6	Gh_D08G2094	382	1	Cotton_A_09755	Gorai.011G107800.1
715	111	Cotton_A_00641	Gh_A03G1812	756	8	Cotton_A_22817	Gh_D02G1352	133	45	Gorai.009G166200.1	Gh_A05G1338	555	1954	Gorai.004G252800.1	Gh_D08G2330	387	39	Cotton_A_01150	Gorai.001G039200.2
720	2	Cotton_A_22835	Gh_A03G0960	766	27	Cotton_A_19603	Gh_D02G0744	133	128	Gorai.009G175900.1	Gh_A05G1428	556	56	Gorai.004G280800.1	Gh_D08G2518	424	2	Cotton_A_08285	Gorai.004G086500.1
720	8	Cotton_A_22817	Gh_A03G0969	907	0	Cotton_A_26586	Gh_D09G1611	133	148	Gorai.009G178400.1	Gh_A05G1452	556	98	Gorai.004G285400.1	Gh_D08G2567	424	3	Cotton_A_08283	Gorai.004G086400.1
727	10	Cotton_A_24165	Gh_A03G1526	909	78	Cotton_A_02009	Gh_D11G0463	133	181	Gorai.009G182200.1	Gh_A05G1491	556	111	Gorai.004G286800.1	Gh_D08G2582	439	7	Cotton_A_08285	Gorai.007G130700.1
822	76	Cotton_A_02009	Gh_A11G0400	913	28	Cotton_A_10879	Gh_D11G0568	133	250	Gorai.009G191100.1	Gh_A05G1567	557	74	Gorai.004G265900.2	Gh_D08G2420	439	8	Cotton_A_08284	Gorai.007G130800.1
827	27	Cotton_A_10879	Gh_A11G0490	913	64	Cotton_A_10830	Gh_D11G0521	133	260	Gorai.009G192200.1	Gh_A05G1577	565	6	Gorai.004G252800.1	Gh_D11G2348	439	9	Cotton_A_08283	Gorai.007G130900.1
827	60	Cotton_A_10830	Gh_A11G0450	920	79	Cotton_A_07879	Gh_D12G2095	133	311	Gorai.009G198700.1	Gh_A05G1635	594	9	Gorai.004G272300.2	Gh_D08G2653	440	46	Cotton_A_14678	Gorai.007G199700.1
830	71	Cotton_A_07879	Gh_A12G1915	921	69	Cotton_A_07974	Gh_D12G1932	133	405	Gorai.009G211800.1	Gh_A05G1744	599	3	Gorai.005G254100.1	Gh_D01G1632	460	4	Cotton_A_34146	Gorai.007G238800.1
831	72	Cotton_A_07974	Gh_A12G1774	922	16	Cotton_A_10768	Gh_D12G0212	133	479	Gorai.009G220600.1	Gh_A05G1830	601	397	Gorai.005G058500.1	Gh_D02G0516	462	3	Cotton_A_14678	Gorai.007G049900.1
832	18	Cotton_A_10768	Gh_A12G0210	924	10	Cotton_A_23668	Gh_D12G0069	134	34	Gorai.009G031200.1	Gh_A05G0217	601	398	Gorai.005G058600.1	Gh_D02G0517	478	16	Cotton_A_18118	Gorai.007G267200.1
836	10	Cotton_A_23668	Gh_A12G0055	924	11	Cotton_A_23667	Gh_D12G0070	134	121	Gorai.009G044100.1	Gh_A05G0320	601	468	Gorai.005G068200.1	Gh_D02G0606	480	2	Cotton_A_29320	Gorai.007G299500.1
836	18	Cotton_A_23656	Gh_A12G0064	924	12	Cotton_A_23666	Gh_D12G0071	134	265	Gorai.009G064700.2	Gh_A05G0507	601	543	Gorai.005G077600.1	Gh_D02G0695	481	11	Cotton_A_26565	Gorai.007G142200.2
836	20	Cotton_A_23652	Gh_A12G0066	924	19	Cotton_A_23656	Gh_D12G0079	135	27	Gorai.009G084400.1	Gh_A05G0661	601	585	Gorai.005G083300.1	Gh_D02G0744	492	5	Cotton_A_30716	Gorai.007G253300.1
836	21	Cotton_A_23651	Gh_A12G0067	924	21	Cotton_A_23652	Gh_D12G0083	135	72	Gorai.009G090300.2	Gh_A05G0722	601	767	Gorai.005G110000.1	Gh_D02G0962	501	4	Cotton_A_08285	Gorai.008G009100.1
845	8	Cotton_A_31063	Gh_A12G1441	935	7	Cotton_A_31063	Gh_D12G1559	135	194	Gorai.009G104500.1	Gh_A05G0863	601	873	Gorai.005G126200.1	Gh_D02G1110	501	5	Cotton_A_08283	Gorai.008G008600.1
853	3	Cotton_A_26586	Gh_A12G2508	938	4	Cotton_A_32580	Gh_D12G0740	136	110	Gorai.009G153500.1	Gh_A05G1233	602	74	Gorai.005G148900.1	Gh_D02G1327	507	111	Cotton_A_01150	Gorai.009G064700.2
853	15	Cotton_A_26600	Gh_A12G2493	942	2	Cotton_A_26586	Gh_D12G2635	137	65	Gorai.009G017700.1	Gh_A05G0093	602	87	Gorai.005G150500.1	Gh_D02G1345	535	6	Cotton_A_00641	Gorai.002G196800.1
853	16	Cotton_A_26601	Gh_A12G2492	942	15	Cotton_A_26600	Gh_D12G2621	138	96	Gorai.009G241100.1	Gh_A05G1984	602	88	Gorai.005G150600.1	Gh_D02G1346	542	116	Cotton_A_00641	Gorai.005G254100.1
853	126	Cotton_A_01355	Gh_A12G2370	942	16	Cotton_A_26603	Gh_D12G2620	141	38	Gorai.009G251900.1	Gh_A05G2047	602	93	Gorai.005G151400.1	Gh_D02G1352	544	11	Cotton_A_08729	Gorai.005G068200.1
979	3	Cotton_A_06224	Gh_A12G2622	942	119	Cotton_A_01355	Gh_D12G2504	145	5	Gorai.009G273400.2	Gh_A05G1666	602	132	Gorai.005G159700.1	Gh_D02G1432	552	2	Cotton_A_22835	Gorai.005G150500.1
999	6	Cotton_A_32417	Gh_A01G0925	946	5	Cotton_A_13344	Gh_D12G1807	158	1	Gorai.010G099100.1	Gh_A05G0320	602	210	Gorai.005G169900.1	Gh_D02G1538	552	3	Cotton_A_22834	Gorai.005G150600.1
1010	0	Cotton_A_12650	Gh_A01G0845	946	46	Cotton_A_13398	Gh_D12G1760	159	4	Gorai.010G001900.1	Gh_A05G1577	602	404	Gorai.005G195000.1	Gh_D02G1766	552	9	Cotton_A_22817	Gorai.005G151400.1
1012	10	Cotton_A_29425	Gh_A01G0370	970	0	Cotton_A_30788	Gh_D12G0853	163	0	Gorai.011G030700.1	Gh_A05G1338	602	439	Gorai.005G198800.1	Gh_D02G1805	558	6	Cotton_A_29541	Gorai.005G058500.1
1019	4	Cotton_A_33534	Gh_A01G0943	1092	5	Cotton_A_32417	Gh_D01G0969	166	0	Gorai.011G046400.1	Gh_A05G1233	603	47	Gorai.005G237300.1	Gh_D02G2078	558	7	Cotton_A_29540	Gorai.005G058600.1
1026	4	Cotton_A_12753	Gh_A02G0699	1100	80	Cotton_A_00107	Gh_D01G0144	169	15	Gorai.012G084000.1	Gh_A05G2931	603	192	Gorai.005G254100.1	Gh_D02G2245	564	22	Cotton_A_19603	Gorai.005G083300.1
1053	32	Cotton_A_12753	Gh_A05G2047	1103	0	Cotton_A_12650	Gh_D01G0873	169	28	Gorai.012G086300.1	Gh_A05G2945	605	12	Gorai.005G131500.1	Gh_D02G1229	569	10	Cotton_A_24165	Gorai.005G220400.1
1069	3	Cotton_A_15148	Gh_A10G1891	1107	7	Cotton_A_33534	Gh_D01G0990	171	41	Gorai.012G068600.1	Gh_A05G3064	608	6	Gorai.005G220400.1	Gh_D04G1513	577	5	Cotton_A_00791	Gorai.005G237300.1
1072	7	Cotton_A_15115	Gh_A11G0819	1142	34	Cotton_A_12753	Gh_D05G2291	171	109	Gorai.012G059300.1	Gh_A05G3141	617	8	Gorai.005G058600.1	Gh_D10G1672	597	8	Cotton_A_19603	Gorai.009G251900.1
1076	35	Cotton_A_14470	Gh_A12G2084	1161	8	Cotton_A_14470	Gh_D08G1956	171	130	Gorai.012G055800.2	Gh_A05G3165	638	5	Gorai.006G156800.1	Gh_D01G2019	603	5	Cotton_A_29540	Gorai.011G187200.1
1076	37	Cotton_A_14472	Gh_A12G2086	1168	2	Cotton_A_15148	Gh_D10G2161	171	193	Gorai.012G046400.1	Gh_A05G3239	644	22	Gorai.006G162600.1	Gh_D04G1063	615	1	Cotton_A_22817	Gorai.013G028400.1
1212	3	Cotton_A_16449	Gh_A05G1577	1170	8	Cotton_A_15115	Gh_D11G0960	171	389	Gorai.012G016200.2	Gh_A05G3489	645	11	Gorai.006G168000.1	Gh_D04G1101	655	1	Cotton_A_23656	Gorai.004G086400.1
1216	25	Cotton_A_09369	Gh_A05G0217	1174	2	Cotton_A_34121	Gh_D11G2195	180	5	Gorai.009G246900.1	Gh_A06G0383	653	71	Gorai.006G168000.1	Gh_D09G1420	655	2	Cotton_A_23652	Gorai.004G086500.1
1221	38	Cotton_A_15590	Gh_A06G1590	1175	34	Cotton_A_14470	Gh_D12G2260	182	4	Gorai.009G192200.1	Gh_A06G0019	653	157	Gorai.006G177600.1	Gh_D09G1511	657	3	Cotton_A_23656	Gorai.004G140800.1
1223	40	Cotton_A_18057	Gh_A06G0633	1175	36	Cotton_A_14472	Gh_D12G2262	186	34	Gorai.010G042300.1	Gh_A06G0299	653	160	Gorai.006G177900.1	Gh_D09G1514	657	5	Cotton_A_23652	Gorai.004G141100.1
1278	3	Cotton_A_21978	Gh_A13G0817	1192	10	Cotton_A_29425	Gh_D01G2331	186	96	Gorai.010G051400.1	Gh_A06G0383	653	209	Gorai.006G183400.1	Gh_D09G1570	666	2	Cotton_A_06224	Gorai.005G148900.1
1279	53	Cotton_A_10528	Gh_A13G2003	1282	3	Cotton_A_13752	Gh_D01G0990	186	301	Gorai.010G082200.1	Gh_A06G0633	653	221	Gorai.006G184700.1	Gh_D09G1582	688	89	Cotton_A_02009	Gorai.007G049900.1
1390	13	Cotton_A_10391	Gh_A02G0651	1285	15	Cotton_A_10028	Gh_D02G1766	189	20	Gorai.010G099100.1	Gh_A06G0776	653	247	Gorai.006G187600.1	Gh_D09G1611	700	27	Cotton_A_10879	Gorai.007G061400.1
1396	6	Cotton_A_02916	Gh_A05G1233	1289	3	Cotton_A_16449	Gh_D05G1755	192	69	Gorai.010G219600.1	Gh_A06G1590	653	652	Gorai.006G235800.1	Gh_D09G2058	700	67	Cotton_A_10830	Gorai.007G056600.1
1398	11	Cotton_A_03931	Gh_A05G1338	1293	8	Cotton_A_18057	Gh_D05G0296	197	12	Gorai.010G001900.1	Gh_A06G0019	653	895	Gorai.006G264700.1	Gh_D09G2327	708	0	Cotton_A_23656	Gorai.007G130900.1
1410	79	Cotton_A_03931	Gh_A10G0264	1295	37	Cotton_A_09369	Gh_D05G0296	201	16	Gorai.010G131800.1	Gh_A06G1006	654	10	Gorai.006G001700.1	Gh_D09G0012	708	1	Cotton_A_23652	Gorai.007G130700.1
1413	31	Cotton_A_17497	Gh_A10G0565	1302	37	Cotton_A_15590	Gh_D06G1943	214	98	Gorai.001G038600.1	Gh_A07G0269	654	165	Gorai.006G023700.1	Gh_D09G0198	714	80	Cotton_A_07879	Gorai.008G228500.1
1414	32	Cotton_A_17053	Gh_A10G0871	1303	44	Cotton_A_18057	Gh_D06G0720	214	104	Gorai.001G039200.2	Gh_A07G0275	654	216	Gorai.006G030700.1	Gh_D09G0264	715	83	Cotton_A_07974	Gorai.008G212100.2
1415	3	Cotton_A_21231	Gh_A10G1567	1337	5	Cotton_A_09369	Gh_D06G0720	214	213	Gorai.001G052700.8	Gh_A07G0392	654	224	Gorai.006G031800.1	Gh_D09G0272	716	19	Cotton_A_10768	Gorai.008G024500.1
1415	27	Cotton_A_21263	Gh_A10G1595	1368	5	Cotton_A_21978	Gh_D13G1062	214	219	Gorai.001G053300.1	Gh_A07G0398	654	345	Gorai.006G050400.1	Gh_D09G0429	719	10	Cotton_A_23668	Gorai.008G007500.1
1423	16	Cotton_A_16171	Gh_A10G0928	1371	49	Cotton_A_10528	Gh_D13G2402	214	500	Gorai.001G089300.1	Gh_A07G0716	655	131	Gorai.006G143400.1	Gh_D09G1208	719	18	Cotton_A_23656	Gorai.008G008600.1
1436	30	Cotton_A_11804	Gh_A10G0680	1462	13	Cotton_A_10391	Gh_D02G0695	214	610	Gorai.001G106500.1	Gh_A07G0856	655	233	Gorai.006G156800.1	Gh_D09G1329	719	20	Cotton_A_23652	Gorai.008G009100.1
1439	24	Cotton_A_02916	Gh_A10G0397	1469	8	Cotton_A_02871	Gh_D04G1116	215	396	Gorai.001G236100.1	Gh_A07G1852	656	111	Gorai.006G104900.1	Gh_D09G0858	726	9	Cotton_A_31063	Gorai.008G172200.1
1440	30	Cotton_A_24192	Gh_A10G0874	1484	3	Cotton_A_02975	Gh_D07G2061	216	63	Gorai.001G259400.1	Gh_A07G1997	656	207	Gorai.006G116100.1	Gh_D09G0972	732	3	Cotton_A_32580	Gorai.008G085700.1
1445	1	Cotton_A_19954	Gh_A10G1358	1486	16	Cotton_A_10193	Gh_D09G0264	216	162	Gorai.001G271800.1	Gh_A07G2109	657	40	Gorai.006G074900.1	Gh_D09G0590	735	0	Cotton_A_30788	Gorai.008G073800.1
1446	6	Cotton_A_24493	Gh_A10G1673	1488	40	Cotton_A_03894	Gh_D10G0226	216	163	Gorai.001G271900.1	Gh_A07G2110	706	0	Gorai.007G130900.1	Gh_D08G0767	738	5	Cotton_A_26586	Gorai.008G298000.1
1454	5	Cotton_A_29628	Gh_A10G1537	1488	71	Cotton_A_03931	Gh_D10G0264	216	186	Gorai.001G274800.1	Gh_A07G2134	709	22	Gorai.007G003400.1	Gh_D11G0024	738	18	Cotton_A_26600	Gorai.008G296600.1
1457	41	Cotton_A_02975	Gh_A11G1243	1490	31	Cotton_A_16171	Gh_D10G0844	219	2	Gorai.001G017400.1	Gh_A07G0143	709	174	Gorai.007G021200.1	Gh_D11G0190	738	19	Cotton_A_26601	Gorai.008G296500.1
1552	18	Cotton_A_13692	Gh_A04G0254	1490	60	Cotton_A_24192	Gh_D10G0879	230	0	Gorai.012G059300.1	Gh_A07G1997	709	416	Gorai.007G049900.1	Gh_D11G0463	738	149	Cotton_A_01355	Gorai.008G281600.1
1556	3	Cotton_A_29674	Gh_A04G0602	1491	33	Cotton_A_11804	Gh_D10G0706	231	4	Gorai.012G086300.1	Gh_A07G2109	709	469	Gorai.007G056600.1	Gh_D11G0521	739	92	Cotton_A_06224	Gorai.008G174200.1
1564	15	Cotton_A_04004	Gh_A05G2347	1494	29	Cotton_A_17497	Gh_D10G0605	231	5	Gorai.012G086200.1	Gh_A07G2110	709	510	Gorai.007G061400.1	Gh_D11G0568	743	5	Cotton_A_13344	Gorai.008G199100.1
1564	48	Cotton_A_04050	Gh_A05G2383	1495	3	Cotton_A_21231	Gh_D10G1825	231	9	Gorai.012G084000.1	Gh_A07G2134	709	544	Gorai.007G065200.1	Gh_D11G0607	743	47	Cotton_A_13398	Gorai.008G194300.1
1566	23	Cotton_A_08647	Gh_A05G1744	1495	26	Cotton_A_21263	Gh_D10G1852	237	28	Gorai.004G140800.1	Gh_A08G1016	709	859	Gorai.007G101800.2	Gh_D11G0960	797	6	Cotton_A_32417	Gorai.002G126200.1
1572	14	Cotton_A_23480	Gh_A05G1830	1498	1	Cotton_A_19954	Gh_D10G1112	237	29	Gorai.004G140900.1	Gh_A08G1017	709	1097	Gorai.007G130700.2	Gh_D11G1223	808	0	Cotton_A_12650	Gorai.002G115900.1
1594	8	Cotton_A_04598	Gh_A05G1539	1506	1	Cotton_A_31024	Gh_D10G0998	237	31	Gorai.004G141100.1	Gh_A08G1019	709	1098	Gorai.007G130800.1	Gh_D11G1224	809	11	Cotton_A_29425	Gorai.002G053700.1
1594	47	Cotton_A_04649	Gh_A05G1491	1514	24	Cotton_A_02916	Gh_D10G0411	237	482	Gorai.004G201800.1	Gh_A08G1558	709	1099	Gorai.007G130900.1	Gh_D11G1225	814	6	Cotton_A_33534	Gorai.002G128200.1
1594	59	Cotton_A_04661	Gh_A05G1479	1515	31	Cotton_A_17053	Gh_D10G0883	238	301	Gorai.004G069600.1	Gh_A08G0527	709	1193	Gorai.007G142200.2	Gh_D11G1323	867	16	Cotton_A_12753	Gorai.005G083300.1
1594	83	Cotton_A_04686	Gh_A05G1452	1524	6	Cotton_A_24493	Gh_D10G1929	238	390	Gorai.004G083200.1	Gh_A08G0633	710	44	Gorai.007G253300.1	Gh_D11G2348	873	7	Cotton_A_15115	Gorai.007G101800.2
1594	105	Cotton_A_04712	Gh_A05G1428	1529	5	Cotton_A_29628	Gh_D10G1784	238	419	Gorai.004G086400.1	Gh_A08G0666	710	91	Gorai.007G261100.1	Gh_D11G2412	879	2	Cotton_A_34121	Gorai.007G240100.1
1595	38	Cotton_A_07027	Gh_A05G0863	1532	29	Cotton_A_02975	Gh_D11G1390	238	420	Gorai.004G086500.1	Gh_A08G0667	710	130	Gorai.007G267200.1	Gh_D11G2462	880	38	Cotton_A_14470	Gorai.008G246400.2
1596	36	Cotton_A_11312	Gh_A05G1338	1662	7	Cotton_A_04598	Gh_D01G0873	238	425	Gorai.004G087300.2	Gh_A08G0673	710	357	Gorai.007G299500.1	Gh_D11G2743	880	40	Cotton_A_14472	Gorai.008G246600.1
1596	46	Cotton_A_11302	Gh_A05G1328	1671	57	Cotton_A_05384	Gh_D05G1251	238	455	Gorai.004G093000.1	Gh_A08G0711	711	25	Gorai.007G151300.1	Gh_D11G1390	896	33	Cotton_A_12753	Gorai.009G251900.1
1597	11	Cotton_A_11452	Gh_A05G0093	1672	49	Cotton_A_04050	Gh_D05G2648	238	470	Gorai.004G096800.2	Gh_A08G0733	711	394	Gorai.007G198800.1	Gh_D11G1815	927	2	Cotton_A_15148	Gorai.011G246200.1
1598	45	Cotton_A_13869	Gh_A05G0661	1673	28	Cotton_A_08647	Gh_D05G1938	238	482	Gorai.004G098800.1	Gh_A08G0747	711	401	Gorai.007G199700.1	Gh_D11G1824	929	6	Cotton_A_00107	Gorai.012G134400.1
1600	4	Cotton_A_26164	Gh_A05G1233	1679	30	Cotton_A_18772	Gh_D05G2471	239	67	Gorai.004G227100.1	Gh_A08G1744	712	178	Gorai.007G238800.1	Gh_D11G2183	955	6	Cotton_A_13752	Gorai.002G128200.1
1603	16	Cotton_A_17317	Gh_A05G2158	1681	18	Cotton_A_23480	Gh_D05G2027	239	68	Gorai.004G227100.3	Gh_A08G1746	712	188	Gorai.007G240100.1	Gh_D11G2195	973	15	Cotton_A_10028	Gorai.005G195000.1
1604	18	Cotton_A_16145	Gh_A05G1984	1707	10	Cotton_A_04598	Gh_D05G1710	239	248	Gorai.004G252800.1	Gh_A08G1950	718	4	Gorai.007G234600.1	Gh_D11G2151	983	3	Cotton_A_16449	Gorai.009G192200.1
1623	1	Cotton_A_16087	Gh_A06G0383	1707	52	Cotton_A_04649	Gh_D05G1662	240	24	Gorai.004G272300.2	Gh_A08G2076	759	18	Gorai.008G172200.1	Gh_D02G1345	987	15	Cotton_A_18057	Gorai.009G031200.1
1628	6	Cotton_A_07027	Gh_A08G1744	1707	84	Cotton_A_04686	Gh_D05G1626	240	87	Gorai.004G280800.1	Gh_A08G2151	762	5	Gorai.008G156900.1	Gh_D02G1766	994	40	Cotton_A_09369	Gorai.009G031200.1
1630	11	Cotton_A_29674	Gh_A09G1367	1707	107	Cotton_A_04712	Gh_D05G1600	240	129	Gorai.004G285400.1	Gh_A08G2202	767	13	Gorai.008G246600.1	Gh_D08G1956	995	37	Cotton_A_13752	Gorai.009G202500.1
1640	2	Cotton_A_11312	Gh_A10G0264	1708	33	Cotton_A_11312	Gh_D05G1507	240	142	Gorai.004G286800.1	Gh_A08G2216	781	0	Gorai.008G090200.1	Gh_D11G2151	998	5	Cotton_A_16299	Gorai.009G246900.3
1642	0	Cotton_A_04050	Gh_A10G1595	1708	40	Cotton_A_11302	Gh_D05G1498	241	69	Gorai.004G265900.2	Gh_A08G2028	783	470	Gorai.008G156900.1	Gh_D12G1423	998	6	Cotton_A_16300	Gorai.009G246900.1
1778	4	Cotton_A_33939	Gh_A05G3692	1709	8	Cotton_A_11452	Gh_D05G0154	246	21	Gorai.004G215500.2	Gh_A08G1661	783	591	Gorai.008G172200.1	Gh_D12G1559	1000	7	Cotton_A_13752	Gorai.009G273400.1
1779	0	Cotton_A_16087	Gh_A05G3726	1711	35	Cotton_A_13869	Gh_D05G0807	249	4	Gorai.004G215500.2	Gh_A08G0633	783	606	Gorai.008G174200.1	Gh_D12G1577	1008	37	Cotton_A_15590	Gorai.010G219600.1
1785	14	Cotton_A_05384	Gh_A05G3849	1712	2	Cotton_A_16087	Gh_D05G2244	266	38	Gorai.006G074900.1	Gh_A09G0591	783	771	Gorai.008G194300.1	Gh_D12G1760	1009	44	Cotton_A_18057	Gorai.010G082200.1
1791	4	Cotton_A_22323	Gh_A09G2418	1716	17	Cotton_A_17317	Gh_D05G2413	266	338	Gorai.006G116100.1	Gh_A09G0941	783	813	Gorai.008G199100.1	Gh_D12G1807	1015	2	Cotton_A_16449	Gorai.010G001900.1
1792	4	Cotton_A_22338	Gh_A09G2433	1719	19	Cotton_A_13692	Gh_D05G3451	267	9	Gorai.006G001700.1	Gh_A09G0014	783	922	Gorai.008G212100.2	Gh_D12G1932	1034	23	Cotton_A_16299	Gorai.010G051400.1
1794	7	Cotton_A_32716	Gh_A12G2674	1723	0	Cotton_A_26164	Gh_D05G1405	267	161	Gorai.006G023700.1	Gh_A09G0209	783	1067	Gorai.008G228500.1	Gh_D12G2095	1042	11	Cotton_A_09369	Gorai.010G082200.1
1816	4	Cotton_A_30566	Gh_A01G0565	1729	4	Cotton_A_31482	Gh_D05G2919	267	214	Gorai.006G031800.1	Gh_A09G0271	783	1216	Gorai.008G246400.2	Gh_D12G2260	1063	5	Cotton_A_36217	Gorai.010G131800.1
1832	11	Cotton_A_07846	Gh_A05G1635	1730	4	Cotton_A_33939	Gh_D05G2311	267	328	Gorai.006G050400.1	Gh_A09G0418	783	1218	Gorai.008G246600.1	Gh_D12G2262	1079	6	Cotton_A_21978	Gorai.013G116800.2
1832	18	Cotton_A_07839	Gh_A05G1627	1750	8	Cotton_A_29674	Gh_D09G1368	267	329	Gorai.006G050700.1	Gh_A09G0420	784	35	Gorai.008G024500.1	Gh_D12G0212	1085	55	Cotton_A_10528	Gorai.013G266100.1
1843	6	Cotton_A_12086	Gh_A09G1415	1751	4	Cotton_A_22338	Gh_D09G1570	268	197	Gorai.006G264700.1	Gh_A09G2122	785	63	Gorai.008G007500.1	Gh_D12G0069	1107	13	Cotton_A_10391	Gorai.005G077600.1
1851	8	Cotton_A_20576	Gh_A09G0014	1751	14	Cotton_A_22323	Gh_D09G1582	269	176	Gorai.006G143400.1	Gh_A09G1202	785	64	Gorai.008G007600.1	Gh_D12G0070	1117	16	Cotton_A_10193	Gorai.006G030700.1
1864	0	Cotton_A_36307	Gh_A09G0591	1752	8	Cotton_A_32487	Gh_D09G0858	270	70	Gorai.006G168000.1	Gh_A09G1415	785	65	Gorai.008G007700.1	Gh_D12G0071	1128	49	Cotton_A_02975	Gorai.007G151300.1
1865	2	Cotton_A_25024	Gh_A09G0209	1764	1	Cotton_A_26164	Gh_D10G0411	270	154	Gorai.006G177600.1	Gh_A09G1501	785	72	Gorai.008G008600.1	Gh_D12G0079	1134	11	Cotton_A_02916	Gorai.009G153500.1
1868	0	Cotton_A_18002	Gh_A09G2122	1800	11	Cotton_A_16145	Gh_D05G3813	270	156	Gorai.006G177900.1	Gh_A09G1503	785	75	Gorai.008G009100.1	Gh_D12G0083	1135	11	Cotton_A_02871	Gorai.009G420500.1
1870	35	Cotton_A_02455	Gh_A09G1503	1805	8	Cotton_A_07027	Gh_D05G3875	276	4	Gorai.006G156800.1	Gh_A09G1288	786	73	Gorai.008G281600.1	Gh_D12G2504	1151	2	Cotton_A_03931	Gorai.009G166200.1
1870	37	Cotton_A_02453	Gh_A09G1501	1810	1	Cotton_A_32716	Gh_D12G2745	278	5	Gorai.009G414400.1	Gh_A09G1367	787	80	Gorai.008G296500.1	Gh_D12G2620	1167	60	Cotton_A_03894	Gorai.011G027200.2
1872	18	Cotton_A_13437	Gh_A09G1288	1898	5	Cotton_A_13437	Gh_D01G2019	286	5	Gorai.012G055800.1	Gh_A09G0209	787	81	Gorai.008G296600.1	Gh_D12G2621	1167	91	Cotton_A_03931	Gorai.011G030700.1
1882	6	Cotton_A_28983	Gh_A09G0271	1913	4	Cotton_A_12086	Gh_D04G1101	290	6	Gorai.006G235800.1	Gh_A10G1358	787	95	Gorai.008G298000.1	Gh_D12G2635	1169	31	Cotton_A_16171	Gorai.011G095600.1
1893	75	Cotton_A_02331	Gh_A11G0180	1916	8	Cotton_A_11172	Gh_D05G0244	297	1	Gorai.009G166200.1	Gh_A10G0264	789	36	Gorai.008G080800.1	Gh_D12G0699	1169	63	Cotton_A_24192	Gorai.011G099900.2
1894	21	Cotton_A_07614	Gh_A11G0026	1917	15	Cotton_A_07846	Gh_D05G1817	303	2	Gorai.011G187200.1	Gh_A10G1429	789	62	Gorai.008G085700.1	Gh_D12G0740	1170	32	Cotton_A_11804	Gorai.011G080700.1
2000	4	Cotton_A_12459	Gh_A09G2271	1933	7	Cotton_A_12086	Gh_D09G1420	303	3	Gorai.011G187300.1	Gh_A10G1430	792	13	Gorai.008G073800.1	Gh_D12G0853	1173	30	Cotton_A_17497	Gorai.011G069800.1
2009	8	Cotton_A_13096	Gh_A09G2396	1935	13	Cotton_A_13096	Gh_D09G1611	303	89	Gorai.011G200600.1	Gh_A10G1537	793	2	Gorai.008G090200.1	Gh_D12G0788	1174	3	Cotton_A_21231	Gorai.011G204600.1
2022	22	Cotton_A_16216	Gh_A03G0476	1937	9	Cotton_A_12476	Gh_D09G2048	303	112	Gorai.011G204600.1	Gh_A10G1567	812	1	Gorai.008G250000.1	Gh_D12G2745	1174	26	Cotton_A_21263	Gorai.011G207900.1
2023	7	Cotton_A_29887	Gh_A03G1037	1937	18	Cotton_A_12459	Gh_D09G2058	303	135	Gorai.011G207900.1	Gh_A10G1595	812	6	Gorai.008G250500.1	Gh_D12G2750	1175	1	Cotton_A_19954	Gorai.011G125000.2
2031	9	Cotton_A_29399	Gh_A04G0970	1941	18	Cotton_A_13437	Gh_D09G1329	303	336	Gorai.011G242100.1	Gh_A10G1862	816	3	Gorai.009G187600.1	Gh_D01G0873	1186	2	Cotton_A_31024	Gorai.011G112900.1
2036	3	Cotton_A_34846	Gh_A04G0936	1943	7	Cotton_A_20576	Gh_D09G0012	303	361	Gorai.011G246200.1	Gh_A10G1891	821	19	Gorai.009G397800.1	Gh_D04G0917	1197	27	Cotton_A_02916	Gorai.011G046400.1
2036	7	Cotton_A_34850	Gh_A04G0941	1956	0	Cotton_A_36307	Gh_D09G0590	304	88	Gorai.011G030700.1	Gh_A10G0264	821	136	Gorai.009G414400.1	Gh_D04G1063	1198	34	Cotton_A_17053	Gorai.011G100200.1
2038	6	Cotton_A_32877	Gh_A04G0639	1957	1	Cotton_A_25024	Gh_D09G0198	304	208	Gorai.011G046400.1	Gh_A10G0397	821	166	Gorai.009G419100.1	Gh_D04G1101	1205	8	Cotton_A_24493	Gorai.011G216500.1
2043	27	Cotton_A_14928	Gh_A04G0896	1959	0	Cotton_A_18002	Gh_D09G2327	305	134	Gorai.011G290900.1	Gh_A10G2147	821	176	Gorai.009G420500.1	Gh_D04G1116	1211	5	Cotton_A_29628	Gorai.011G200600.1
2044	15	Cotton_A_24935	Gh_A04G0859	1960	42	Cotton_A_02455	Gh_D09G1514	307	45	Gorai.011G069800.1	Gh_A10G0565	823	35	Gorai.009G165100.1	Gh_D05G1498	1230	5	Cotton_A_18772	Gorai.002G128200.1
2046	7	Cotton_A_25417	Gh_A04G0602	1960	44	Cotton_A_02453	Gh_D09G1511	309	15	Gorai.011G095600.1	Gh_A10G0928	823	43	Gorai.009G166200.1	Gh_D05G1507	1237	7	Cotton_A_04598	Gorai.002G115900.1
2055	12	Cotton_A_06005	Gh_A05G3489	1975	6	Cotton_A_28983	Gh_D09G0272	312	113	Gorai.011G160200.1	Gh_A10G1090	823	132	Gorai.009G175900.1	Gh_D05G1600	1238	6	Cotton_A_16145	Gorai.002G219700.1
2059	19	Cotton_A_15919	Gh_A05G3064	1987	82	Cotton_A_02331	Gh_D11G0190	312	124	Gorai.011G158200.2	Gh_A10G1104	823	155	Gorai.009G178400.1	Gh_D05G1626	1242	3	Cotton_A_04712	Gorai.002G081800.1
2066	4	Cotton_A_18230	Gh_A05G1577	1988	22	Cotton_A_07614	Gh_D11G0024	312	328	Gorai.011G125000.2	Gh_A10G1358	823	188	Gorai.009G182200.1	Gh_D05G1662	1252	0	Cotton_A_23171	Gorai.004G137300.1
2073	1	Cotton_A_23460	Gh_A05G3141	2118	10	Cotton_A_29893	Gh_D02G1432	313	41	Gorai.011G108500.1	Gh_A10G0803	823	233	Gorai.009G187600.1	Gh_D05G1710	1264	9	Cotton_A_29674	Gorai.006G162500.5
2077	4	Cotton_A_29054	Gh_A05G2931	2119	20	Cotton_A_16216	Gh_D03G1062	313	47	Gorai.011G107800.1	Gh_A10G0810	823	265	Gorai.009G191100.1	Gh_D05G1745	1265	4	Cotton_A_22338	Gorai.006G183400.1
2078	3	Cotton_A_31530	Gh_A05G2945	2121	43	Cotton_A_06359	Gh_D04G1593	313	102	Gorai.011G100200.1	Gh_A10G0871	823	275	Gorai.009G192200.1	Gh_D05G1755	1265	14	Cotton_A_22323	Gorai.006G184700.1
2083	12	Cotton_A_18230	Gh_A06G0019	2125	9	Cotton_A_29399	Gh_D04G1513	313	105	Gorai.011G099900.2	Gh_A10G0874	823	337	Gorai.009G198700.1	Gh_D05G1817	1265	27	Cotton_A_22305	Gorai.006G186100.1
2093	20	Cotton_A_13937	Gh_A08G0673	2138	3	Cotton_A_34846	Gh_D04G1453	314	71	Gorai.011G080700.1	Gh_A10G0680	823	446	Gorai.009G211800.1	Gh_D05G1938	1266	8	Cotton_A_32487	Gorai.006G104900.1
2093	25	Cotton_A_13928	Gh_A08G0667	2138	6	Cotton_A_34850	Gh_D04G1456	331	1	Gorai.004G086500.1	Gh_A11G1070	823	524	Gorai.009G220600.1	Gh_D05G2027	1285	0	Cotton_A_23171	Gorai.008G250500.1
2093	26	Cotton_A_13925	Gh_A08G0666	2148	9	Cotton_A_06005	Gh_D04G0130	331	2	Gorai.004G086400.1	Gh_A11G1072	824	38	Gorai.009G246900.1	Gh_D05G2244	1286	8	Cotton_A_32716	Gorai.008G250000.1
2098	4	Cotton_A_25417	Gh_A09G1367	2150	27	Cotton_A_14928	Gh_D04G1401	335	164	Gorai.007G101800.2	Gh_A11G0819	824	81	Gorai.009G251900.1	Gh_D05G2291	1290	60	Cotton_A_05384	Gorai.009G135600.1
2099	5	Cotton_A_34784	Gh_A09G0941	2154	15	Cotton_A_15919	Gh_D04G0580	335	381	Gorai.007G130700.2	Gh_A11G1070	824	101	Gorai.009G254900.1	Gh_D05G2311	1291	49	Cotton_A_04050	Gorai.009G293300.1
2100	1	Cotton_A_29008	Gh_A09G0209	2156	14	Cotton_A_24935	Gh_D04G1357	335	382	Gorai.007G130800.1	Gh_A11G1071	824	172	Gorai.009G267500.1	Gh_D05G2413	1291	67	Cotton_A_04072	Gorai.009G295200.1
2102	17	Cotton_A_06428	Gh_A10G0803	2160	9	Cotton_A_29008	Gh_D04G0461	335	383	Gorai.007G130900.1	Gh_A11G1072	824	221	Gorai.009G273400.1	Gh_D05G2471	1292	29	Cotton_A_08647	Gorai.009G211800.1
2102	23	Cotton_A_06419	Gh_A10G0810	2161	6	Cotton_A_25417	Gh_D04G1063	335	467	Gorai.007G142200.2	Gh_A11G1167	824	383	Gorai.009G293300.1	Gh_D05G2648	1298	33	Cotton_A_18772	Gorai.009G273400.1
2107	6	Cotton_A_13928	Gh_A11G1070	2163	4	Cotton_A_29054	Gh_D04G0715	335	533	Gorai.007G151300.1	Gh_A11G1243	824	400	Gorai.009G295200.1	Gh_D05G2666	1301	18	Cotton_A_23480	Gorai.009G220600.1
2107	7	Cotton_A_13925	Gh_A11G1072	2166	4	Cotton_A_31531	Gh_D04G0735	335	878	Gorai.007G198800.1	Gh_A11G1655	824	520	Gorai.009G311900.1	Gh_D05G2811	1318	7	Cotton_A_18772	Gorai.009G202500.1
2236	12	Cotton_A_29791	Gh_A02G0927	2176	3	Cotton_A_18230	Gh_D05G1755	335	885	Gorai.007G199700.1	Gh_A11G1669	824	590	Gorai.009G322800.1	Gh_D05G2919	1329	4	Cotton_A_32487	Gorai.009G090300.2
2241	11	Cotton_A_30221	Gh_A03G1365	2178	2	Cotton_A_06005	Gh_D05G2666	336	45	Gorai.007G261100.1	Gh_A11G2096	825	97	Gorai.009G017700.1	Gh_D05G0154	1332	12	Cotton_A_04598	Gorai.009G187600.1
2247	4	Cotton_A_16801	Gh_A04G0254	2193	26	Cotton_A_13937	Gh_D08G0775	336	82	Gorai.007G267200.1	Gh_A11G2160	825	172	Gorai.009G026300.1	Gh_D05G0244	1332	57	Cotton_A_04649	Gorai.009G182200.1
2252	0	Cotton_A_27006	Gh_A08G0527	2193	31	Cotton_A_13928	Gh_D08G0768	336	282	Gorai.007G299500.1	Gh_A11G2426	825	216	Gorai.009G031200.1	Gh_D05G0296	1332	89	Cotton_A_04686	Gorai.009G178400.1
2254	4	Cotton_A_30627	Gh_A08G0633	2193	32	Cotton_A_13925	Gh_D08G0767	337	111	Gorai.007G049900.1	Gh_A11G0400	825	334	Gorai.009G044100.1	Gh_D05G0426	1332	113	Cotton_A_04712	Gorai.009G175900.1
2256	3	Cotton_A_34680	Gh_A08G0733	2197	5	Cotton_A_34784	Gh_D09G0972	337	156	Gorai.007G056600.1	Gh_A11G0450	825	514	Gorai.009G064700.2	Gh_D05G0626	1333	38	Cotton_A_07027	Gorai.009G104500.1
2276	8	Cotton_A_24227	Gh_A13G1441	2198	2	Cotton_A_03437	Gh_D09G1582	337	193	Gorai.007G061400.1	Gh_A11G0490	826	124	Gorai.009G346700.1	Gh_D05G3114	1334	35	Cotton_A_11312	Gorai.009G166200.1
2276	16	Cotton_A_24238	Gh_A13G1450	2200	3	Cotton_A_29008	Gh_D09G0198	338	21	Gorai.007G003400.1	Gh_A11G0026	827	270	Gorai.009G135600.1	Gh_D05G1251	1334	45	Cotton_A_11302	Gorai.009G165100.1
2277	13	Cotton_A_23278	Gh_A13G0947	2204	14	Cotton_A_06428	Gh_D10G0960	338	159	Gorai.007G021200.1	Gh_A11G0180	828	126	Gorai.009G084400.1	Gh_D05G0807	1335	11	Cotton_A_11452	Gorai.009G017700.1
2295	19	Cotton_A_00876	Gh_A13G0242	2204	21	Cotton_A_06419	Gh_D10G0951	346	33	Gorai.007G234600.1	Gh_A11G1859	828	170	Gorai.009G090300.2	Gh_D05G0857	1336	45	Cotton_A_13869	Gorai.009G084400.1
2297	6	Cotton_A_09029	Gh_A13G1654	2327	11	Cotton_A_30221	Gh_D02G1805	375	0	Gorai.007G130700.2	Gh_A12G0067	829	116	Gorai.009G153500.1	Gh_D05G1405	1338	2	Cotton_A_16087	Gorai.009G246900.1
2299	37	Cotton_A_15755	Gh_A13G0039	2329	9	Cotton_A_29791	Gh_D02G1110	377	287	Gorai.008G156900.1	Gh_A12G1300	847	10	Gorai.009G031200.1	Gh_D06G0720	1338	54	Cotton_A_16145	Gorai.009G241100.1
2302	23	Cotton_A_16801	Gh_A13G1237	2340	6	Cotton_A_15755	Gh_D05G2666	377	403	Gorai.008G172200.1	Gh_A12G1441	849	1	Gorai.009G044100.1	Gh_D06G0900	1340	4	Cotton_A_26164	Gorai.009G153500.1
2304	1	Cotton_A_17946	Gh_A13G1223	2348	0	Cotton_A_27006	Gh_D08G0621	377	692	Gorai.008G212100.2	Gh_A12G1774	859	13	Gorai.009G064700.2	Gh_D07G0331	1342	17	Cotton_A_17317	Gorai.009G267500.1
2308	9	Cotton_A_26478	Gh_A13G0530	2374	13	Cotton_A_23278	Gh_D13G1199	377	824	Gorai.008G228500.1	Gh_A12G1915	866	14	Gorai.009G419100.1	Gh_D09G1420	1354	4	Cotton_A_33939	Gorai.009G254900.1
2319	2	Cotton_A_35056	Gh_A13G0827	2375	9	Cotton_A_26478	Gh_D13G0600	377	979	Gorai.008G246400.2	Gh_A12G2084	873	6	Gorai.009G153500.1	Gh_D10G0411	1355	5	Cotton_A_31482	Gorai.009G322800.1
2444	3	Cotton_A_32534	Gh_A03G0944	2401	19	Cotton_A_00876	Gh_D13G0259	377	981	Gorai.008G246600.1	Gh_A12G2086	904	5	Gorai.009G241100.1	Gh_D05G3813	1359	4	Cotton_A_13692	Gorai.009G390500.2
2447	1	Cotton_A_35520	Gh_A05G1567	2403	7	Cotton_A_09029	Gh_D13G2017	379	49	Gorai.008G007500.1	Gh_A12G0055	909	7	Gorai.009G104500.1	Gh_D05G3875	1391	8	Cotton_A_11312	Gorai.011G030700.1
				2406	35	Cotton_A_15755	Gh_D13G0054	379	57	Gorai.008G008600.1	Gh_A12G0064	918	3	Gorai.010G001900.1	Gh_D05G1755	1392	4	Cotton_A_26164	Gorai.011G046400.1
				2408	1	Cotton_A_17946	Gh_D13G1521	379	58	Gorai.008G009100.1	Gh_A12G0066	922	5	Gorai.010G082200.1	Gh_D05G0296	1393	2	Cotton_A_04050	Gorai.011G207900.1
				2409	20	Cotton_A_16801	Gh_D13G1537	379	177	Gorai.008G024500.1	Gh_A12G0210	929	0	Gorai.010G051400.1	Gh_D05G2244	1407	7	Cotton_A_04072	Gorai.012G016200.2
				2412	9	Cotton_A_24227	Gh_D13G1757	381	78	Gorai.008G281600.1	Gh_A12G2370	931	70	Gorai.010G042300.1	Gh_D06G0320	1413	8	Cotton_A_04072	Gorai.013G005800.1
				2412	17	Cotton_A_24238	Gh_D13G1747	383	57	Gorai.008G296500.1	Gh_A12G2492	931	144	Gorai.010G051400.1	Gh_D06G0413	1422	10	Cotton_A_13437	Gorai.002G241300.1
				2454	2	Cotton_A_32534	Gh_D02G1327	383	58	Gorai.008G296600.1	Gh_A12G2493	931	381	Gorai.010G082200.1	Gh_D06G0720	1423	4	Cotton_A_30566	Gorai.002G081800.1
				2458	1	Cotton_A_35520	Gh_D05G1745	383	72	Gorai.008G298000.1	Gh_A12G2508	931	510	Gorai.010G099100.1	Gh_D06G0900	1431	4	Cotton_A_07839	Gorai.002G126200.1
								399	19	Gorai.013G116800.2	Gh_A13G0817	931	635	Gorai.010G115200.2	Gh_D06G1049	1441	2	Cotton_A_11172	Gorai.004G280800.1
								399	26	Gorai.013G117900.1	Gh_A13G0827	931	756	Gorai.010G131800.1	Gh_D06G1200	1446	0	Cotton_A_18002	Gorai.005G058500.1
								399	122	Gorai.013G132000.1	Gh_A13G0947	932	527	Gorai.010G219600.1	Gh_D06G1943	1449	7	Cotton_A_07839	Gorai.005G110000.1
								399	342	Gorai.013G166500.1	Gh_A13G1223	936	92	Gorai.010G257000.1	Gh_D06G2162	1464	7	Cotton_A_12086	Gorai.006G168000.1
								399	354	Gorai.013G168000.1	Gh_A13G1237	984	41	Gorai.011G027200.2	Gh_D10G0226	1465	13	Cotton_A_13096	Gorai.006G187600.1
								400	32	Gorai.013G005800.1	Gh_A13G0039	984	74	Gorai.011G030700.1	Gh_D10G0264	1466	24	Cotton_A_12459	Gorai.006G235800.1
								400	195	Gorai.013G028400.1	Gh_A13G0242	984	213	Gorai.011G046400.1	Gh_D10G0411	1470	20	Cotton_A_13437	Gorai.006G156800.1
								401	143	Gorai.013G266100.1	Gh_A13G2003	984	383	Gorai.011G069800.1	Gh_D10G0605	1473	8	Cotton_A_20576	Gorai.006G001700.1
								403	102	Gorai.013G099400.1	Gh_A13G0772	984	465	Gorai.011G080700.1	Gh_D10G0706	1487	0	Cotton_A_36307	Gorai.006G074900.1
								403	103	Gorai.013G099500.1	Gh_A13G0773	984	585	Gorai.011G095600.1	Gh_D10G0844	1488	2	Cotton_A_25024	Gorai.006G023700.1
								408	22	Gorai.013G192000.1	Gh_A13G1441	984	618	Gorai.011G099900.2	Gh_D10G0879	1493	0	Cotton_A_18002	Gorai.006G264700.1
								408	29	Gorai.013G192900.1	Gh_A13G1450	984	621	Gorai.011G100200.1	Gh_D10G0883	1494	43	Cotton_A_02455	Gorai.006G177900.1
								410	61	Gorai.013G068400.1	Gh_A13G0530	984	678	Gorai.011G107800.1	Gh_D10G0951	1494	45	Cotton_A_02453	Gorai.006G177600.1
								492	5	Gorai.002G252300.1	Gh_A01G2148	984	685	Gorai.011G108500.1	Gh_D10G0960	1498	42	Cotton_A_15442	Gorai.006G143400.1
								586	1	Gorai.004G211400.2	Gh_A08G2385	984	717	Gorai.011G112900.1	Gh_D10G0998	1513	6	Cotton_A_28983	Gorai.006G031800.1
								674	4	Gorai.006G235800.1	Gh_A09G2271	984	810	Gorai.011G125000.2	Gh_D10G1112	1518	83	Cotton_A_02331	Gorai.007G021200.1
								684	8	Gorai.006G187600.1	Gh_A09G2396	984	1047	Gorai.011G158200.2	Gh_D10G1403	1519	23	Cotton_A_07614	Gorai.007G003400.1
								685	3	Gorai.006G186100.1	Gh_A09G2408	984	1060	Gorai.011G160200.1	Gh_D10G1419	1537	6	Cotton_A_12086	Gorai.009G419100.1
								686	4	Gorai.006G184700.1	Gh_A09G2418	984	1214	Gorai.011G184500.1	Gh_D10G1643	1542	8	Cotton_A_11172	Gorai.009G026300.1
								687	4	Gorai.006G183400.1	Gh_A09G2433	984	1215	Gorai.011G184600.1	Gh_D10G1644	1543	17	Cotton_A_07846	Gorai.009G198700.1
								802	11	Gorai.008G250500.1	Gh_A12G2669	984	1235	Gorai.011G187200.1	Gh_D10G1670	1558	0	Cotton_A_18002	Gorai.011G187400.1
								802	7	Gorai.008G250000.1	Gh_A12G2674	984	1326	Gorai.011G200600.1	Gh_D10G1784	1591	24	Cotton_A_16216	Gorai.003G117900.1
								880	4	Gorai.009G254900.1	Gh_A05G3692	984	1358	Gorai.011G204600.1	Gh_D10G1825	1596	28	Cotton_A_13937	Gorai.004G087300.2
								882	9	Gorai.009G246900.1	Gh_A05G3726	984	1384	Gorai.011G207900.1	Gh_D10G1852	1596	33	Cotton_A_13928	Gorai.004G086500.1
								889	14	Gorai.009G135600.1	Gh_A05G3849	986	26	Gorai.011G242100.1	Gh_D10G2127	1596	34	Cotton_A_13925	Gorai.004G086400.1
								1003	2	Gorai.011G184500.1	Gh_A10G2288	986	55	Gorai.011G246200.1	Gh_D10G2161	1602	7	Cotton_A_29887	Gorai.005G159300.1
								1039	1	Gorai.012G150400.1	Gh_A04G1453	988	8	Gorai.011G290900.1	Gh_D10G2394	1602	9	Cotton_A_29893	Gorai.005G159700.1
												1017	172	Gorai.012G124500.1	Gh_D04G1357	1606	4	Cotton_A_29399	Gorai.005G220400.1
												1017	207	Gorai.012G129200.1	Gh_D04G1401	1614	3	Cotton_A_03437	Gorai.006G184700.1
												1017	247	Gorai.012G134400.1	Gh_D04G1453	1617	3	Cotton_A_29008	Gorai.006G023700.1
												1017	250	Gorai.012G134800.1	Gh_D04G1456	1618	5	Cotton_A_34784	Gorai.006G116100.1
												1017	301	Gorai.012G142200.1	Gh_D04G1513	1619	4	Cotton_A_25417	Gorai.006G162600.1
												1017	365	Gorai.012G150400.1	Gh_D04G1593	1624	9	Cotton_A_13928	Gorai.007G130700.1
												1018	169	Gorai.012G055800.1	Gh_D04G0461	1624	10	Cotton_A_13925	Gorai.007G130900.1
												1018	266	Gorai.012G068600.1	Gh_D04G0580	1646	5	Cotton_A_13928	Gorai.008G009100.1
												1018	342	Gorai.012G079200.1	Gh_D04G0674	1646	6	Cotton_A_13925	Gorai.008G008600.1
												1018	381	Gorai.012G084000.1	Gh_D04G0715	1651	4	Cotton_A_18230	Gorai.009G192200.1
												1018	399	Gorai.012G086200.1	Gh_D04G0735	1659	7	Cotton_A_25417	Gorai.009G414400.1
												1018	492	Gorai.012G099700.2	Gh_D04G0855	1662	3	Cotton_A_06005	Gorai.009G295200.1
												1019	114	Gorai.012G016200.2	Gh_D04G0130	1665	11	Cotton_A_18230	Gorai.010G001900.1
												1026	6	Gorai.012G016200.2	Gh_D05G2666	1679	15	Cotton_A_06428	Gorai.011G108500.1
												1027	2	Gorai.012G086300.1	Gh_D07G2320	1679	22	Cotton_A_06419	Gorai.011G107800.1
												1027	1	Gorai.012G086200.1	Gh_D07G2321	1686	44	Cotton_A_06359	Gorai.012G150400.1
												1030	5	Gorai.012G055800.1	Gh_D09G0198	1693	1	Cotton_A_23460	Gorai.012G059300.1
												1061	3	Gorai.013G005800.1	Gh_D05G2666	1694	9	Cotton_A_29399	Gorai.012G142200.1
												1069	34	Gorai.013G116800.2	Gh_D13G1062	1700	4	Cotton_A_34846	Gorai.012G134400.1
												1069	41	Gorai.013G117900.1	Gh_D13G1071	1700	7	Cotton_A_34850	Gorai.012G134800.1
												1069	145	Gorai.013G132000.1	Gh_D13G1199	1708	14	Cotton_A_06005	Gorai.012G016200.2
												1069	410	Gorai.013G166500.1	Gh_D13G1521	1710	27	Cotton_A_14928	Gorai.012G129200.1
												1069	421	Gorai.013G168000.1	Gh_D13G1537	1714	19	Cotton_A_15919	Gorai.012G068600.1
												1070	44	Gorai.013G005800.1	Gh_D13G0054	1715	15	Cotton_A_24935	Gorai.012G124500.1
												1070	223	Gorai.013G028400.1	Gh_D13G0259	1719	9	Cotton_A_29008	Gorai.012G055800.1
												1071	316	Gorai.013G266100.1	Gh_D13G2402	1721	4	Cotton_A_29054	Gorai.012G084000.1
												1072	112	Gorai.013G068400.1	Gh_D13G0600	1723	5	Cotton_A_31530	Gorai.012G086200.1
												1072	344	Gorai.013G099400.1	Gh_D13G0906	1733	2	Cotton_A_06005	Gorai.013G005800.1
												1072	345	Gorai.013G099500.1	Gh_D13G0907	1760	0	Cotton_A_27006	Gorai.004G069600.1
												1074	57	Gorai.013G220300.1	Gh_D13G2017	1765	4	Cotton_A_30627	Gorai.004G083200.1
												1076	52	Gorai.013G192900.1	Gh_D13G1747	1770	11	Cotton_A_30221	Gorai.005G198800.1
												1076	43	Gorai.013G192000.1	Gh_D13G1757	1771	14	Cotton_A_29791	Gorai.005G126200.1
												1088	4	Gorai.013G106400.1	Gh_D03G1721	1783	4	Cotton_A_00876	Gorai.005G151400.1
												1094	24	Gorai.N001200.1	Gh_D07G1630	1796	5	Cotton_A_00876	Gorai.008G171400.1
																1806	8	Cotton_A_15755	Gorai.009G295200.1
																1832	8	Cotton_A_15755	Gorai.012G016200.2
																1850	14	Cotton_A_23278	Gorai.013G132000.1
																1851	10	Cotton_A_24227	Gorai.013G192000.1
																1851	15	Cotton_A_24238	Gorai.013G192900.4
																1852	9	Cotton_A_26478	Gorai.013G068400.1
																1852	17	Cotton_A_26492	Gorai.013G069500.1
																1877	21	Cotton_A_00876	Gorai.013G028400.1
																1880	7	Cotton_A_09029	Gorai.013G220300.1
																1881	37	Cotton_A_15755	Gorai.013G005800.1
																1884	1	Cotton_A_17946	Gorai.013G166500.1
																1885	16	Cotton_A_16801	Gorai.013G168000.1
																1898	2	Cotton_A_35056	Gorai.013G117900.1
																1905	4	Cotton_A_32534	Gorai.005G148900.1
																1914	1	Cotton_A_35520	Gorai.009G191100.1
