# Supplementary material for: Deep Transcriptome Analysis Reveals Reactive Oxygen Species (ROS) Network Evolution, Response to Abiotic Stress, and Regulation of Fiber Development in Cotton
Source: Int J Mol Sci. 2019 Apr 15;20(8):1863. doi: 10.3390/ijms20081863 (PMC6514600; doi:10.3390/ijms20081863)
Supplement: Supplementary file 1 [file ijms-20-01863-s001.zip › Supplementary files/Table S3.xlsx]

## Sheet: Sheet1
Table S3: Orthologous gene pairs of G. hirsutum, G. arboreum and G. raimondii
Gene name	G.hirsutum			G. arboretum	G. raimondii
	A-subgenome	D-subgenome	Scaffold
CSD1	Gh_A11G2096	Gh_D11G2412		Cotton_A_30467	Gorai.007G261100
CSD2	Gh_A13G1450	Gh_D13G1747		Cotton_A_24238	Gorai.013G192900
CSD3	Gh_A09G2473	Gh_D09G0858		Cotton_A_32487	Gorai.006G104900
CSD5	Gh_A05G0722	Gh_D05G0857		Cotton_A_36793	Gorai.009G090300
CSD6	Gh_A13G0817	Gh_D13G1062		Cotton_A_21978	Gorai.013G116800
FSD1	Gh_A07G0392	Gh_D07G0457		Cotton_A_03623	Gorai.001G052700
FSD2	Gh_A13G0530	Gh_D13G0600		Cotton_A_26478	Gorai.013G068400
MSD1	Gh_A05G2383	Gh_D05G2648		Cotton_A_04050	Gorai.009G293300
MSD2	Gh_A10G1595	Gh_D10G1852		Cotton_A_21263	Gorai.011G207900
APX1	Gh_A01G1388	Gh_D01G1632		Cotton_A_31285	Gorai.002G196800
APX2	Gh_A02G1648	Gh_D03G0074		Cotton_A_01547	Gorai.003G008200
APX3	Gh_A03G1812	Gh_D02G2245		Cotton_A_00641	Gorai.005G254100
APX4	Gh_A04G0652	Gh_D04G1116		Cotton_A_02871	Gorai.009G420500
APX5	Gh_A05G0863	Gh_D05G3875		Cotton_A_07027	Gorai.009G104500
APX6	Gh_A05G3726	Gh_D05G2244		Cotton_A_16087	Gorai.009G246900
APX7	Gh_A06G0383	Gh_D06G0413			Gorai.010G051400
APX8	Gh_A06G2046	Gh_D06G1049		Cotton_A_34995	Gorai.010G115200
APX9	Gh_A08G1744	Gh_D08G2093		Cotton_A_05101	Gorai.004G227100
APX10	Gh_A08G1745	Gh_D08G2094		Cotton_A_05102	Gorai.004G227200
APX11	Gh_A08G1746	Gh_D08G2095		Cotton_A_05103	Gorai.004G227300
APX12	Gh_A13G2003	Gh_D13G2402		Cotton_A_10528	Gorai.013G266100
MDAR1	Gh_A01G1777	Gh_D01G2019		Cotton_A_00532	Gorai.002G241300
MDAR2	Gh_A09G1288	Gh_D09G1329		Cotton_A_13437	Gorai.006G156800
MDAR3	Gh_A10G0928	Gh_D10G0844		Cotton_A_16171	Gorai.011G095600
MDAR4	Gh_A12G2674	Gh_D12G2745		Cotton_A_32716	Gorai.008G250000
MDAR5	Gh_A13G1223	Gh_D13G1521		Cotton_A_17946	Gorai.013G166500
MDAR6		Gh_D09G0264	Gh_Sca009869G01	Cotton_A_10193	Gorai.006G030700
DHAR1	Gh_A01G2148	Gh_D01G2119		Cotton_A_00425	Gorai.002G252300
DHAR2	Gh_A05G3064	Gh_D04G0580		Cotton_A_15919	Gorai.012G068600
DHAR3	Gh_A07G0716	Gh_D07G0778		Cotton_A_30812	Gorai.001G089300
DHAR4	Gh_A09G1501	Gh_D09G1511		Cotton_A_02453	Gorai.006G177600
DHAR5	Gh_A10G1891	Gh_D10G2161		Cotton_A_15148	Gorai.011G246200
GR1	Gh_A03G0807	Gh_D02G1229		Cotton_A_31743	Gorai.005G131500
GR2	Gh_A10G1090	Gh_D10G1419		Cotton_A_31437	Gorai.011G160200
GR3	Gh_A11G1167	Gh_D11G1323		Cotton_A_26565	Gorai.007G142200
CAT1	Gh_A01G0845	Gh_D01G0873		Cotton_A_12650	Gorai.002G115900
CAT2	Gh_A02G1698	Gh_D03G0021		Cotton_A_28649	Gorai.003G002800
CAT3	Gh_A05G1539	Gh_D05G1710	Gh_Sca049259G01	Cotton_A_04598	Gorai.009G187600
CAT4	Gh_A07G1556	Gh_D07G1724		Cotton_A_27460	Gorai.001G198700
GPX1	Gh_A07G0269	Gh_D07G0326		Cotton_A_19216	Gorai.001G038600
GPX2	Gh_A08G0633	Gh_D08G0734		Cotton_A_30627	Gorai.004G083200
GPX3	Gh_A08G0673	Gh_D08G0775		Cotton_A_13937	Gorai.004G087300
GPX4	Gh_A08G1661	Gh_D08G1994		Cotton_A_19545	Gorai.004G215500
GPX5	Gh_A08G2385	Gh_D08G1956		Cotton_A_25980	Gorai.004G211400
GPX6	Gh_A09G2408	Gh_D09G1595		Cotton_A_22305	Gorai.006G186100
GPX7	Gh_A12G2084	Gh_D12G2260		Cotton_A_14470	Gorai.008G246400
GPX8	Gh_A12G2086	Gh_D12G2262		Cotton_A_14472	Gorai.008G246600
FER1	Gh_A04G1408	Gh_D04G1310		Cotton_A_03437	Gorai.012G118700
FER2	Gh_A05G2629	Gh_D05G2919		Cotton_A_31482	Gorai.009G322800
FER3	Gh_A09G2418	Gh_D09G1582		Cotton_A_22323	Gorai.006G184700
FER4	Gh_A10G2147	Gh_D10G2394		Cotton_A_10151	Gorai.011G290900
FER5					Gorai.012G079200
FER6		Gh_D04G0674	Gh_Sca005799G01	Cotton_A_26229	Gorai.012G079300
RBOH1	Gh_A02G1791	Gh_D03G0688		Cotton_A_38536	Gorai.003G085100
RBOH2	Gh_A08G0982	Gh_D08G1257		Cotton_A_31123	Gorai.004G137300
RBOH3	Gh_A12G2669	Gh_D12G2750		Cotton_A_23171	Gorai.008G250500
RBOH4	Gh_A11G2426	Gh_D11G2743		Cotton_A_29320	Gorai.007G299500
RBOH5		Gh_D07G1961	Gh_Sca042593G01
RBOH6	Gh_A03G0476	Gh_D03G1062	Gh_Sca015744G01	Cotton_A_16216	Gorai.003G117900
RBOH7	Gh_A07G0398	Gh_D07G0463		Cotton_A_03631	Gorai.001G053300
RBOH8	Gh_A12G1774	Gh_D12G1932		Cotton_A_07974	Gorai.008G212100
RBOH9	Gh_A01G0943	Gh_D01G0990		Cotton_A_33534	Gorai.002G128200
RBOH10	Gh_A05G1666	Gh_D05G1864		Cotton_A_13752	Gorai.009G202500
RBOH11	Gh_A05G2211	Gh_D05G2471		Cotton_A_18772	Gorai.009G273400
RBOH12			Gh_Sca067051G01	Cotton_A_37931
RBOH13	Gh_A07G0143	Gh_D07G0136	Gh_Sca061303G01	Cotton_A_05673	Gorai.001G017400
RBOH14	Gh_A12G2653	Gh_D12G1807		Cotton_A_13344	Gorai.008G199100
RBOH15	Gh_A07G0856	Gh_D07G0928		Cotton_A_24667	Gorai.001G106500
FRO1	Gh_A05G1830	Gh_D05G2027		Cotton_A_23480	Gorai.009G220600
FRO2	Gh_A05G2158	Gh_D05G2413		Cotton_A_17317	Gorai.009G267500
FRO3	Gh_A09G0418			Cotton_A_38430	Gorai.006G050400
FRO4	Gh_A09G0420	Gh_D09G0429		Cotton_A_31253	Gorai.006G050700
FRO5	Gh_A10G1862	Gh_D10G2127		Cotton_A_38817	Gorai.011G242100
FRO6	Gh_A11G0450	Gh_D11G0521		Cotton_A_10830	Gorai.007G056600
FRO7	Gh_A11G0819	Gh_D11G0960		Cotton_A_15115	Gorai.007G101800
AOX1	Gh_A03G1526			Cotton_A_24166	Gorai.005G220400
AOX2	Gh_A03G1527		Gh_Sca047319G01	Cotton_A_24165	Gorai.005G220500
AOX3	Gh_A04G0970	Gh_D04G1513		Cotton_A_29399	Gorai.012G142200
AOX4	Gh_A05G1491	Gh_D05G1662		Cotton_A_04649	Gorai.009G182200
AOX5	Gh_A12G2493	Gh_D12G2621		Cotton_A_26600	Gorai.008G296600
PrxR1	Gh_A04G0493	Gh_D04G0917		Cotton_A_39780	Gorai.009G397800
PrxR2		Gh_D12G2827
PrxR3		Gh_D01G1239			Gorai.002G157500
PrxR4	Gh_A10G1567	Gh_D10G1825		Cotton_A_21231	Gorai.011G204600
PrxR5					Gorai.001G249700
PrxR6		Gh_D05G0244	Gh_Sca011288G01	Cotton_A_11172	Gorai.009G026300
PrxR7	Gh_A05G3849	Gh_D05G1251		Cotton_A_05384	Gorai.009G135600
PrxR8	Gh_A08G2151	Gh_D08G2518		Cotton_A_14514	Gorai.004G280800
PrxR9	Gh_A01G1793	Gh_D01G2034	Gh_Sca157066G01	Cotton_A_00515	Gorai.002G243200
PrxR10	Gh_A10G1104	Gh_D10G1403		Cotton_A_29838	Gorai.011G158200
PrxR11	Gh_A08G2202	Gh_D08G2567		Cotton_A_11865	Gorai.004G285400
Trx1	Gh_A01G0392	Gh_D01G2342		Cotton_A_35156	Gorai.002G061800
Trx2	Gh_A09G0941	Gh_D09G0972		Cotton_A_34784	Gorai.006G116100
Trx3	Gh_A04G0602	Gh_D04G1063		Cotton_A_25417	Gorai.009G414400
Trx4	Gh_A09G1367		Gh_Sca212745G01	Cotton_A_29674	Gorai.006G162600
Trx5	Gh_A05G1567	Gh_D05G1745		Cotton_A_35520	Gorai.009G191100
Trx6	Gh_A01G0370	Gh_D01G2331		Cotton_A_29425	Gorai.002G053700
Trx7	Gh_A04G0936	Gh_D04G1453		Cotton_A_34846	Gorai.012G134400
Trx8	Gh_A01G2026	Gh_D13G0608			Gorai.011G179300
Trx9				Cotton_A_26492	Gorai.013G069500
Trx10		Gh_D01G0144		Cotton_A_00107
Trx11		Gh_D11G2239
Trx12	Gh_A03G1039			Cotton_A_21246
Trx13	Gh_A10G1673	Gh_D10G1930		Cotton_A_24493	Gorai.011G216600
Trx14	Gh_A13G0947	Gh_D13G1199		Cotton_A_23278	Gorai.013G132000
Trx15	Gh_A03G1663	Gh_D02G2078		Cotton_A_00791	Gorai.005G237300
Trx16	Gh_A12G0210	Gh_D12G0212		Cotton_A_10768	Gorai.008G024500
Trx17	Gh_A04G0896	Gh_D04G1401		Cotton_A_14928	Gorai.012G129200
Trx18	Gh_A04G0254	Gh_D05G3451		Cotton_A_13692	Gorai.009G390500
Trx19	Gh_A13G1237	Gh_D13G1537		Cotton_A_16801	Gorai.013G168000
Trx20		Gh_D03G1721		Cotton_A_37443	Gorai.013G106400
Trx21	Gh_A05G2047	Gh_D05G2291		Cotton_A_12753	Gorai.009G251900
Trx22	Gh_A02G0699	Gh_D02G0744		Cotton_A_19603	Gorai.005G083300
Trx23	Gh_A05G1744	Gh_D05G1938		Cotton_A_08647	Gorai.009G211800
Trx24	Gh_A03G1112	Gh_D02G1538		Cotton_A_39577	Gorai.005G169900
Trx25	Gh_A05G2534	Gh_D05G2811			Gorai.009G311900
Trx26	Gh_A04G1345	Gh_D04G0855		Cotton_A_37690	Gorai.012G099700
Trx27	Gh_A11G0026	Gh_D11G0024		Cotton_A_07613	Gorai.007G003400
Trx28				Cotton_A_07614
Trx29				Cotton_A_09913	Gorai.004G201800
Trx30	Gh_A03G0712	Gh_D02G0962		Cotton_A_38006	Gorai.005G110000
Trx31	Gh_A05G1627			Cotton_A_07839
Trx32	Gh_A01G0925	Gh_D01G0969		Cotton_A_32417	Gorai.002G126200
Trx33	Gh_A10G0871	Gh_D10G0883		Cotton_A_17053	Gorai.011G100200
Trx34	Gh_A11G1655	Gh_D11G1815			Gorai.007G198800
Trx35	Gh_A05G1428	Gh_D05G1600		Cotton_A_04712	Gorai.009G175900
Trx36	Gh_A01G0565	Gh_D01G0574		Cotton_A_30566	Gorai.002G081800
Trx37		Gh_D06G1943		Cotton_A_15590	Gorai.010G219600
Trx38	Gh_A09G2271	Gh_D09G2058		Cotton_A_12459	Gorai.006G235800
Trx39	Gh_A10G1358	Gh_D10G1112		Cotton_A_19954	Gorai.011G125000
Trx40	Gh_A05G2809	Gh_D05G3114		Cotton_A_30823	Gorai.009G346700
Trx41	Gh_A09G0209	Gh_D09G0198		Cotton_A_25024	Gorai.006G023700
Trx42	Gh_A05G3165	Gh_D04G0461		Cotton_A_29008	Gorai.012G055800
Trx43	Gh_A04G0941	Gh_D04G1456		Cotton_A_34850	Gorai.012G134800
Trx44	Gh_A05G3692	Gh_D05G2311		Cotton_A_33939	Gorai.009G254900
Trx45		Gh_D02G1432		Cotton_A_29887	Gorai.005G159700
Trx46				Cotton_A_29893
Trx47	Gh_A03G1037				Gorai.005G159300
Trx48	Gh_A08G0527	Gh_D08G0621		Cotton_A_27006	Gorai.004G069600
Trx49	Gh_A06G0633	Gh_D06G0720		Cotton_A_18057	Gorai.010G082200
Trx50	Gh_A05G0217	Gh_D05G0296		Cotton_A_09369	Gorai.009G031200
Trx51		Gh_D12G1760	Gh_Sca006915G01	Cotton_A_13398	Gorai.008G194300
Trx52	Gh_A13G0827	Gh_D13G1071		Cotton_A_35056	Gorai.013G117900
Trx53	Gh_A13G1441	Gh_D13G1757		Cotton_A_24227	Gorai.013G192000
Trx54	Gh_A11G2160	Gh_D11G2462		Cotton_A_18118	Gorai.007G267200
Trx55	Gh_A09G1503	Gh_D09G1514		Cotton_A_02455	Gorai.006G177900
Trx56	Gh_A10G0803	Gh_D10G0960		Cotton_A_06428	Gorai.011G108500
Trx57		Gh_D12G0740		Cotton_A_32580	Gorai.008G085700
Trx58	Gh_A06G0299	Gh_D06G0320		Cotton_A_35720	Gorai.010G042300
Trx59	Gh_A11G3114	Gh_D11G2195		Cotton_A_34121	Gorai.007G240100
Trx60	Gh_A11G0490	Gh_D11G0568		Cotton_A_10879	Gorai.007G061400
Trx61	Gh_A10G2267	Gh_D10G0998		Cotton_A_31024	Gorai.011G112900
Trx62	Gh_A09G0014	Gh_D09G0012		Cotton_A_20576	Gorai.006G001700
Trx63	Gh_A08G2076	Gh_D08G2653		Cotton_A_20155	Gorai.004G272300
GLR1	Gh_A07G2134	Gh_D07G2345		Cotton_A_22704	Gorai.001G274800
GLR2	Gh_A02G0462	Gh_D02G0517		Cotton_A_29540	Gorai.005G058600
GLR3		Gh_D10G1672		Cotton_A_33880	Gorai.011G187400
GLR4	Gh_A10G1429	Gh_D10G1670		Cotton_A_33877	Gorai.011G187200
GLR5	Gh_A10G1430	Gh_D10G1671		Cotton_A_33879	Gorai.011G187300
GLR6	Gh_A12G0067	Gh_D12G0083		Cotton_A_23651	Gorai.008G009200
GLR7	Gh_A11G1070	Gh_D11G1223		Cotton_A_08285	Gorai.007G130700
GLR8	Gh_A08G0667	Gh_D08G0768		Cotton_A_13928	Gorai.004G086500
GLR9	Gh_A08G1019	Gh_D08G1293		Cotton_A_34669	Gorai.004G141100
GLR10	Gh_A12G0066	Gh_D12G0082		Cotton_A_23652	Gorai.008G009100
GLR11	Gh_A11G0180	Gh_D11G0190		Cotton_A_02331	Gorai.007G021200
GLR12	Gh_A09G2433	Gh_D09G1570	Gh_Sca124052G01	Cotton_A_22338	Gorai.006G183400
GLR13	Gh_A10G0680	Gh_D10G0706		Cotton_A_11804	Gorai.011G080700
GLR14	Gh_A10G0246	Gh_D10G0226		Cotton_A_03894	Gorai.011G027200
GLR15	Gh_A05G1984	Gh_D05G3813		Cotton_A_16145	Gorai.009G241100
GLR16		Gh_D01G1882		Cotton_A_35618	Gorai.002G219700
GLR17	Gh_A13G1107	Gh_D13G0259		Cotton_A_00876	Gorai.013G028400
GLR18	Gh_A03G0969	Gh_D02G1352		Cotton_A_22817	Gorai.005G151400
GLR19				Cotton_A_26601
GLR20	Gh_A12G2492	Gh_D12G2620		Cotton_A_26603	Gorai.008G296500
GLR21	Gh_A09G0271	Gh_D09G0272		Cotton_A_28983	Gorai.006G031800
GLR22	Gh_A08G0733	Gh_D08G0870		Cotton_A_34680	Gorai.004G096800
GLR23	Gh_A10G0874	Gh_D10G0879		Cotton_A_24192	Gorai.011G099900
GLR24	Gh_A07G1852	Gh_D07G2061		Cotton_A_05898	Gorai.001G236100
GLR25	Gh_A11G1243	Gh_D11G1390		Cotton_A_02975	Gorai.007G151300
GLR26	Gh_A08G1017	Gh_D08G1291		Cotton_A_34665	Gorai.004G140900
GLR27	Gh_A11G1071	Gh_D11G1224		Cotton_A_08284	Gorai.007G130800
GLR28	Gh_A09G2122	Gh_D09G2327	Gh_Sca181996G01	Cotton_A_18002	Gorai.006G264700
GLR29	Gh_A02G0461	Gh_D02G0516	Gh_Sca049404G01	Cotton_A_29541	Gorai.005G058500
GLR30	Gh_A08G0666	Gh_D08G0767	Gh_Sca150730G01	Cotton_A_13925	Gorai.004G086400
GLR31	Gh_A08G1016			Cotton_A_34664	Gorai.004G140800
GLR32	Gh_A12G0064	Gh_D12G0079		Cotton_A_23656	Gorai.008G008600
GLR33	Gh_A11G1072	Gh_D11G1225		Cotton_A_08283	Gorai.007G130900
GLR34	Gh_A13G1654	Gh_D13G2017		Cotton_A_09029	Gorai.013G220300
GLR35	Gh_A08G2216	Gh_D08G2582		Cotton_A_11881	Gorai.004G286800
GLR36	Gh_A06G0776	Gh_D06G0900		Cotton_A_36880	Gorai.010G099100
GLR37	Gh_A05G0320	Gh_D05G0426		Cotton_A_14014	Gorai.009G044100
GLR38	Gh_A05G1233	Gh_D05G1405		Cotton_A_26164	Gorai.009G153500
GLR39	Gh_A10G0397	Gh_D10G0411		Cotton_A_02916	Gorai.011G046400
GLR40		Gh_D06G2162			Gorai.010G257000
GLR41	Gh_A10G0264	Gh_D10G0264		Cotton_A_03931	Gorai.011G030700
GLR42	Gh_A03G1365	Gh_D02G1805		Cotton_A_30221	Gorai.005G198800
GLR43	Gh_A05G1338	Gh_D05G1507		Cotton_A_11312	Gorai.009G166200
GLR44		Gh_D02G1766		Cotton_A_10028	Gorai.005G195000
GLR45	Gh_A12G1300	Gh_D12G1423			Gorai.008G156900
GLR46	Gh_A04G0859	Gh_D04G1357	Gh_Sca139666G01	Cotton_A_24935	Gorai.012G124500
GLR47	Gh_A05G2931	Gh_D04G0715		Cotton_A_29054	Gorai.012G084000
PER1	Gh_A04G0639	Gh_D04G1101		Cotton_A_32877	Gorai.009G419100
PER2	Gh_A09G1415	Gh_D09G1420		Cotton_A_12086	Gorai.006G168000
PER3	Gh_A05G1452	Gh_D05G1626		Cotton_A_04686	Gorai.009G178400
PER4	Gh_A12G2370	Gh_D12G2504		Cotton_A_01355	Gorai.008G281600
PER5				Cotton_A_35692
PER6				Cotton_A_35693
PER7	Gh_A10G1537	Gh_D10G1784		Cotton_A_29628	Gorai.011G200600
PER8	Gh_A05G1479			Cotton_A_04661
PER9	Gh_A09G2396	Gh_D09G1611		Cotton_A_13096	Gorai.006G187600
PER10	Gh_A12G2508	Gh_D12G2635	Gh_Sca005203G01	Cotton_A_26586	Gorai.008G298000
PER11	Gh_A07G1997	Gh_D07G2217		Cotton_A_19460	Gorai.001G259400
PER12	Gh_A05G3141			Cotton_A_23460	Gorai.012G059300
PER13		Gh_D01G1310			Gorai.002G164800
PER14		Gh_D01G1317	Gh_Sca005203G02		Gorai.002G165200
PER15			Gh_Sca007173G01	Cotton_A_40054
PER16	Gh_A08G0346	Gh_D04G0736
PER17	Gh_A04G1322	Gh_D08G0891		Cotton_A_37129
PER18	Gh_A08G0747				Gorai.004G098800
PER19	Gh_A10G0810	Gh_D10G0951		Cotton_A_06419	Gorai.011G107800
PER20	Gh_A02G1466	Gh_D03G0246	Gh_Sca196880G01	Cotton_A_09755	Gorai.003G029000
PER21	Gh_A12G0695	Gh_D12G0699		Cotton_A_38803	Gorai.008G080800
PER22	Gh_A05G2945			Cotton_A_31530	Gorai.012G086300
PER23	Gh_A07G2109	Gh_D07G2320		Cotton_A_28610	Gorai.001G271800
PER24	Gh_A07G2110	Gh_D07G2321			Gorai.001G271900
PER25		Gh_D04G0735		Cotton_A_31531	Gorai.012G086200
PER26	Gh_A07G0012	Gh_D07G0019	Gh_Sca139665G01	Cotton_A_28176
PER27	Gh_A05G1328	Gh_D05G1498		Cotton_A_11302	Gorai.009G165100
PER28	Gh_A11G2043	Gh_D11G2348		Cotton_A_30716	Gorai.007G253300
PER29	Gh_A08G1950	Gh_D08G2330		Cotton_A_29727	Gorai.004G252800
PER30	Gh_A05G0661	Gh_D05G0807		Cotton_A_13869	Gorai.009G084400
PER31	Gh_A02G0927	Gh_D02G1110		Cotton_A_29791	Gorai.005G126200
PER32	Gh_A01G1487	Gh_D01G1726		Cotton_A_25132	Gorai.002G208800
PER33	Gh_A05G2347		Gh_Sca085725G01	Cotton_A_18127
PER34	Gh_A11G2169			Cotton_A_04004
PER35				Cotton_A_01354
PER36		Gh_D03G0641			Gorai.003G090000
PER37	Gh_A02G1203	Gh_D03G0643		Cotton_A_39374	Gorai.003G088700
PER38	Gh_A05G0093	Gh_D05G0154		Cotton_A_11452	Gorai.009G017700
PER39	Gh_A08G2028	Gh_D08G2420		Cotton_A_05819	Gorai.004G265900
PER40	Gh_A11G3132	Gh_D11G2183		Cotton_A_34146	Gorai.007G238800
PER41	Gh_A09G1202	Gh_D09G1208		Cotton_A_11599	Gorai.006G143400
PER42	Gh_A08G0712			Cotton_A_37873	Gorai.004G093000
PER43	Gh_A04G1453	Gh_D04G1593		Cotton_A_06359	Gorai.012G150400
PER44		Gh_D12G0853		Cotton_A_30788	Gorai.008G073800
PER45	Gh_A05G3489	Gh_D04G0130		Cotton_A_06005	Gorai.012G016200
PER46	Gh_A13G0039			Cotton_A_15755	Gorai.009G295200
PER47				Cotton_A_40362	Gorai.013G005800
PER48		Gh_D07G1630		Cotton_A_12476	Gorai.N001200
PER49	Gh_A02G0542	Gh_D02G0606		Cotton_A_08729	Gorai.005G068200
PER50	Gh_A11G0400	Gh_D11G0463		Cotton_A_02009	Gorai.007G049900
PER51					Gorai.007G070800
PER52	Gh_A11G0523	Gh_D11G0607			Gorai.007G065200
PER53	Gh_A11G1669	Gh_D11G1824		Cotton_A_14678	Gorai.007G199700
PER54	Gh_A05G1635	Gh_D05G1817		Cotton_A_07846	Gorai.009G198700
PER55	Gh_A12G1915	Gh_D12G2095		Cotton_A_07879	Gorai.008G228500
PER56	Gh_A03G0944	Gh_D02G1327		Cotton_A_32534	Gorai.005G148900
PER57	Gh_A12G2622	Gh_D12G1577		Cotton_A_06224	Gorai.008G174200
PER58	Gh_A12G0795	Gh_D12G0788		Cotton_A_35302	Gorai.008G090200
PER59	Gh_A11G1859	Gh_D11G2151		Cotton_A_36159	Gorai.007G234600
PER60	Gh_A06G1006	Gh_D06G1200		Cotton_A_36217	Gorai.010G131800
PER61	Gh_A02G0651	Gh_D02G0695		Cotton_A_10391	Gorai.005G077600
PER62	Gh_A05G1577	Gh_D05G1755		Cotton_A_16449	Gorai.009G192200
PER63	Gh_A06G0019			Cotton_A_18230	Gorai.010G001900
PER64	Gh_A02G1663	Gh_D03G0059		Cotton_A_01533	Gorai.003G006600
PER65	Gh_A05G3239			Cotton_A_40805	Gorai.012G046400
PER66	Gh_A09G0591	Gh_D09G0590		Cotton_A_36307	Gorai.006G074900
PER67	Gh_A10G2288	Gh_D10G1644		Cotton_A_38785	Gorai.011G184600
PER68	Gh_A10G2290	Gh_D10G1643		Cotton_A_38788	Gorai.011G184500
PER69	Gh_A12G0055	Gh_D12G0069		Cotton_A_23668	Gorai.008G007500
PER70	Gh_A12G0056	Gh_D12G0070		Cotton_A_23666	Gorai.008G007700
PER71		Gh_D12G0071
PER72		Gh_D12G0072		Cotton_A_23667	Gorai.008G007600
PER73	Gh_A12G1441	Gh_D12G1559		Cotton_A_31063	Gorai.008G172200
PER74	Gh_A03G0960	Gh_D02G1345		Cotton_A_22835	Gorai.005G150500
PER75	Gh_A13G0772	Gh_D13G0906		Cotton_A_36396	Gorai.013G099400
PER76	Gh_A13G0773	Gh_D13G0907		Cotton_A_36397	Gorai.013G099500
PER77	Gh_A13G0774	Gh_D13G0909		Cotton_A_36398	Gorai.013G099600
PER78		Gh_D02G1346		Cotton_A_22834	Gorai.005G150600
PER79	Gh_A07G0275	Gh_D07G0331		Cotton_A_19224	Gorai.001G039200
PER80	Gh_A05G0507	Gh_D05G0626		Cotton_A_01150	Gorai.009G064700
PER81	Gh_A10G0565	Gh_D10G0605		Cotton_A_17497	Gorai.011G069800
