# Supplementary material for: Deep Transcriptome Analysis Reveals Reactive Oxygen Species (ROS) Network Evolution, Response to Abiotic Stress, and Regulation of Fiber Development in Cotton
Source: Int J Mol Sci. 2019 Apr 15;20(8):1863. doi: 10.3390/ijms20081863 (PMC6514600; doi:10.3390/ijms20081863)
Supplement: Supplementary file 1 [file ijms-20-01863-s001.zip › Supplementary files/Table S4.xlsx]

## Sheet: Sheet1
Table S4: Expression levels of ROS network genes of G. hirsutum (TM-1), G. arboreum, and G. raimondii fiber
Gene name	G. hirsutun Asubgenome	G. hirsutun Dsubgenome	G. arboreum	G. raimondii	G. hirsutum_A subgenome				G. hirsutum_D subgenome				G. arboreum		G. raimondii
	Gene ID	Gene ID	Gene ID	Gene ID	5 DPA	10 DPA	20 DPA	25 DPA	5 DPA	10 DPA	20 DPA	25 DPA	10 DPA	20 DPA	10 DPA	20 DPA
CSD1	Gh_A11G2096	Gh_D11G2412	Cotton_A_30467	Gorai.007G261100	18.92	15.39	18.4	11.16	16.19	15.96	16.94	7.11	115.83	161.02	2.17	3.7
CSD2	Gh_A13G1450	Gh_D13G1747	Cotton_A_24238	Gorai.013G192900	420.87	889.89	175.3	278.4	380.33	633.83	141	274.96	2376.42	1963.18	0	1.79
CSD3	Gh_A09G2473	Gh_D09G0858	Cotton_A_32487	Gorai.006G104900	36.17	59	17.5	18.04	54.27	74.26	19.91	27.38	190.19	129.14	0	0
CSD5	Gh_A05G0722	Gh_D05G0857	Cotton_A_36793	Gorai.009G090300	3.56	0.62	0.96	2.34	0	0	0	0.18	9.82	12.91	0	0
CSD6	Gh_A13G0817	Gh_D13G1062	Cotton_A_21978	Gorai.013G116800	132.03	120.79	77.25	68.17	352.74	335.46	141.89	131.16	1130.82	615.44	9.21	10.11
FSD1	Gh_A07G0392	Gh_D07G0457	Cotton_A_03623	Gorai.001G052700	2.49	0.94	1.71	2.52	4.63	3.16	4.93	37.22	8.25	4.03	0	0
FSD2	Gh_A13G0530	Gh_D13G0600	Cotton_A_26478	Gorai.013G068400	2.31	0.47	8.04	3.39	2.71	0.47	1.72	2.85	2.93	11.21	0	0
MSD1	Gh_A05G2383	Gh_D05G2648	Cotton_A_04050	Gorai.009G293300	160.28	178.71	58.74	135.95	74.82	50.18	64.2	107.76	417.83	392.63	28.48	58.26
MSD2	Gh_A10G1595	Gh_D10G1852	Cotton_A_21263	Gorai.011G207900	261.03	199.74	60.63	46.12	65.99	99.59	22.49	21.95	375.09	214.62	51.73	34.93
APX1	Gh_A01G1388	Gh_D01G1632	Cotton_A_31285	Gorai.002G196800	0	0.81	0	0.39	0.56	0	0	0	2.91	0.29	0	0.56
APX2	Gh_A02G1648	Gh_D03G0074	Cotton_A_01547	Gorai.003G008200	0.92	1.3	3.86	2.96	0.61	0.74	1.15	0.8	0.9	1.6	0.62	1.5
APX3	Gh_A03G1812	Gh_D02G2245	Cotton_A_00641	Gorai.005G254100	28	28.56	49.38	38.08	23.74	22.69	28.33	20.31	56.39	174.27	5.25	29.67
APX4	Gh_A04G0652	Gh_D04G1116	Cotton_A_02871	Gorai.009G420500	0	0	0	0	0.15	0	0.28	0.38	9.15	6.61	0	0
APX5	Gh_A05G0863	Gh_D05G3875	Cotton_A_07027	Gorai.009G104500	1179.51	1341.92	102.97	134.21	511.55	706.14	117.06	170.81	1374.88	1028.72	178.67	118.33
APX6	Gh_A05G3726	Gh_D05G2244	Cotton_A_16087	Gorai.009G246900	197.05	78.2	66.51	37.9	164.46	91.77	42.89	32.68	101.79	75.69	28.99	17.35
APX7	Gh_A06G0383	Gh_D06G0413		Gorai.010G051400	3.03	2.59	0.59	0.48	2.55	1.66	0.86	1.2	NA	NA	2.79	2.81
APX8	Gh_A06G2046	Gh_D06G1049	Cotton_A_34995	Gorai.010G115200	3.54	3.6	1.18	2.44	11.06	9.88	0.93	0.86	19.95	8.56	1.65	0
APX9	Gh_A08G1744	Gh_D08G2093	Cotton_A_05101	Gorai.004G227100	55.34	66.95	22.9	39.11	16.33	18.27	30.68	35.98	92.48	55.83	7.06	6.66
APX10	Gh_A08G1745	Gh_D08G2094	Cotton_A_05102	Gorai.004G227200	1.51	0.81	2.21	3.87	5.2	4.7	3.71	6.03	207.04	87.71	1.3	0
APX11	Gh_A08G1746	Gh_D08G2095	Cotton_A_05103	Gorai.004G227300	193.55	195.22	55.28	57.52	40.07	50.59	28.05	25.69	220.7	180.08	0	0.14
APX12	Gh_A13G2003	Gh_D13G2402	Cotton_A_10528	Gorai.013G266100	0.14	0.51	11.54	5.07	0	0	0	0.12	4.31	60.08	2.74	1.56
MDAR1	Gh_A01G1777	Gh_D01G2019	Cotton_A_00532	Gorai.002G241300	113.78	201.75	61.32	59.21	88.96	108.76	53.81	45.57	284.34	216.94	86.96	90.95
MDAR2	Gh_A09G1288	Gh_D09G1329	Cotton_A_13437	Gorai.006G156800	167.06	227.43	50.45	40.74	221.51	256.61	60.78	53.42	268.65	144.95	45.1	68.5
MDAR3	Gh_A10G0928	Gh_D10G0844	Cotton_A_16171	Gorai.011G095600	4.32	4.52	12.41	6.5	5.17	4.29	8.02	6.28	9.26	19.5	8.48	13.29
MDAR4	Gh_A12G2674	Gh_D12G2745	Cotton_A_32716	Gorai.008G250000	30	17.22	9.01	9.75	36.77	24.65	15.18	13.97	72.9	44.96	15.15	19.38
MDAR5	Gh_A13G1223	Gh_D13G1521	Cotton_A_17946	Gorai.013G166500	0.2	0	0.09	0.35	0.96	2.55	0.9	0.46	27.03	25.96	7.57	7.66
MDAR6		Gh_D09G0264	Cotton_A_10193	Gorai.006G030700	NA	NA	NA	NA	0.19	0.34	7.25	6.34	1.16	1.07	0.07	14.69
DHAR1	Gh_A01G2148	Gh_D01G2119	Cotton_A_00425	Gorai.002G252300	6.74	3.28	3.9	25.79	96.76	160.15	4.28	46.71	10.14	17.29	325.38	55.64
DHAR2	Gh_A05G3064	Gh_D04G0580	Cotton_A_15919	Gorai.012G068600	211.9	268.04	27.37	56.19	975.38	769.01	68.27	87.44	1159.9	410.55	674.28	54.51
DHAR3	Gh_A07G0716	Gh_D07G0778	Cotton_A_30812	Gorai.001G089300	12.53	8.95	3.64	6.17	11.19	5.55	7.13	9.52	18.48	10.52	28.98	15.99
DHAR4	Gh_A09G1501	Gh_D09G1511	Cotton_A_02453	Gorai.006G177600	9.31	11.59	13.43	14.36	18.28	10.19	23.38	23.35	68.84	91.92	7.8	2.38
DHAR5	Gh_A10G1891	Gh_D10G2161	Cotton_A_15148	Gorai.011G246200	33.53	32.1	34.99	32.7	49.88	73.46	61.47	40.13	755.93	767.49	136.8	71.05
GR1	Gh_A03G0807	Gh_D02G1229	Cotton_A_31743	Gorai.005G131500	25.18	28.19	16.54	14.68	35.81	51.24	46.23	32.25	54.82	52.98	0.01	3.69
GR2	Gh_A10G1090	Gh_D10G1419	Cotton_A_31437	Gorai.011G160200	18.81	21.28	18.65	17.27	11.11	8.13	15.31	13.38	76.58	71.63	18.08	26.56
GR3	Gh_A11G1167	Gh_D11G1323	Cotton_A_26565	Gorai.007G142200	5.54	4.45	9.07	11.65	7.29	6.79	6.83	8.92	9.32	11.7	0.38	0.38
CAT1	Gh_A01G0845	Gh_D01G0873	Cotton_A_12650	Gorai.002G115900	58.84	120.92	104.64	89.44	53.5	128.35	116.52	99.86	121.18	174.79	67.81	126.93
CAT3	Gh_A05G1539	Gh_D05G1710	Cotton_A_04598	Gorai.009G187600	1.32	2.91	2.1	4.9	29.22	35.58	25.92	25.08	0	1.82	13.54	31.47
CAT4	Gh_A07G1556	Gh_D07G1724	Cotton_A_27460	Gorai.001G198700	0.08	0.14	0	0	0	0.13	0	0.13	0	1.94	0.4	11
GPX1	Gh_A07G0269	Gh_D07G0326	Cotton_A_19216	Gorai.001G038600	58.78	53.84	33.45	20.24	38.15	46.01	26.22	13.51	89.97	58.09	31.5	26.94
GPX2	Gh_A08G0633	Gh_D08G0734	Cotton_A_30627	Gorai.004G083200	13.82	16.94	41.53	39.72	3.18	24.67	3.73	4.2	237.38	521.77	4.25	0.81
GPX3	Gh_A08G0673	Gh_D08G0775	Cotton_A_13937	Gorai.004G087300	11.94	12.3	5.16	3.25	9.57	12.53	4.5	3.51	33.02	12.87	3.31	0
GPX4	Gh_A08G1661	Gh_D08G1994	Cotton_A_19545	Gorai.004G215500	65.44	120.23	75.03	45.89	52.46	113.14	18.9	21.58	316.99	134.14	0	0
GPX5	Gh_A08G2385	Gh_D08G1956	Cotton_A_25980	Gorai.004G211400	23.25	17.21	22.75	33.03	21.11	29.88	76.12	67.38	0	0	11.03	3.31
GPX6	Gh_A09G2408	Gh_D09G1595	Cotton_A_22305	Gorai.006G186100	0.68	0	0.42	5.48	0.29	1.01	1.03	0.24	18.31	9.95	1.63	0.62
GPX7	Gh_A12G2084	Gh_D12G2260	Cotton_A_14470	Gorai.008G246400	15.94	17.01	20.67	46.32	11.1	17.04	20.2	64.71	138.34	87.01	0	2
GPX8	Gh_A12G2086	Gh_D12G2262	Cotton_A_14472	Gorai.008G246600	63.72	31.53	11.91	8.04	66.09	27.21	17.01	16.63	344.85	113.14	0.27	0.2
FER2	Gh_A05G2629	Gh_D05G2919	Cotton_A_31482	Gorai.009G322800	0.23	0	6.55	5.45	1.15	0.95	20.55	53.05	1.92	11.92	1.34	24.3
FER3	Gh_A09G2418	Gh_D09G1582	Cotton_A_22323	Gorai.006G184700	30.62	59.14	4.7	41.15	55.6	167.32	1.4	54.07	104.83	774.53	51.14	13.22
FER4	Gh_A10G2147	Gh_D10G2394	Cotton_A_10151	Gorai.011G290900	13.49	6.52	4.09	24.03	28.71	15.62	0.92	10.66	276.41	236.13	0.49	0
FER5				Gorai.012G079200	NA	NA	NA	NA	NA	NA	NA	NA	NA	NA	16.16	2.17
FER6		Gh_D04G0674	Cotton_A_26229	Gorai.012G079300	NA	NA	NA	NA	25.27	16.56	10.76	12.85	36.46	19.78	7.06	4.18
RBOH1	Gh_A02G1791	Gh_D03G0688	Cotton_A_38536	Gorai.003G085100	0.31	0.29	4.49	3.95	0.34	0.17	0.42	2.32	1.22	10.42	1.06	13.99
RBOH3	Gh_A12G2669	Gh_D12G2750	Cotton_A_23171	Gorai.008G250500	0.19	0.11	1.78	2.84	2.18	2	12.18	8.6	0.29	1.65	7.87	4.01
RBOH6	Gh_A03G0476	Gh_D03G1062	Cotton_A_16216	Gorai.003G117900	0	0	0.18	0	1.61	1.06	3.75	4.32	0.83	0.6	2.31	4.84
RBOH7	Gh_A07G0398	Gh_D07G0463	Cotton_A_03631	Gorai.001G053300	1.2	0.78	3.99	2.3	1.05	1.12	0.47	0.77	1.64	2.71	2.06	0.37
RBOH8	Gh_A12G1774	Gh_D12G1932	Cotton_A_07974	Gorai.008G212100	3.12	2.19	17.77	9.12	4.06	5.07	26.18	11.89	5.51	8.39	0.83	0.69
RBOH11	Gh_A05G2211	Gh_D05G2471	Cotton_A_18772	Gorai.009G273400	1.12	2.63	2.86	13.49	1.19	1.52	1.37	11.59	0.36	0.14	0.94	0.07
RBOH13	Gh_A07G0143	Gh_D07G0136	Cotton_A_05673	Gorai.001G017400	0	0.14	0	0	0	0	0	0.03	2.09	0.06	0	0.11
RBOH14	Gh_A12G2653	Gh_D12G1807	Cotton_A_13344	Gorai.008G199100	0	0.41	5.33	1.25	0.37	0.14	0.64	2.07	2.16	3.09	0	0.01
FRO1	Gh_A05G1830	Gh_D05G2027	Cotton_A_23480	Gorai.009G220600	0.25	0.43	0	0	0.25	1.74	0	0	0	0	2.85	2.35
FRO2	Gh_A05G2158	Gh_D05G2413	Cotton_A_17317	Gorai.009G267500	2.58	3	12.85	8.51	0.13	0.32	9.85	5.34	4.53	12.05	0.77	21.17
FRO5	Gh_A10G1862	Gh_D10G2127	Cotton_A_38817	Gorai.011G242100	2.73	3.36	3.35	2.28	5.97	5.93	4.7	2.73	2.07	3.02	3.76	14.63
FRO6	Gh_A11G0450	Gh_D11G0521	Cotton_A_10830	Gorai.007G056600	71.46	51.91	39.81	35.91	76.37	51.88	29.65	30.26	766.69	386.01	128.91	98
AOX2	Gh_A03G1527		Cotton_A_24165	Gorai.005G220500	7.35	48.9	13.67	9.98	NA	NA	NA	NA	46.18	23.14	5.37	4.07
AOX3	Gh_A04G0970	Gh_D04G1513	Cotton_A_29399	Gorai.012G142200	0	0.32	0	0.47	0.36	1.3	0	0.95	3.63	0.45	1.26	0.62
AOX4	Gh_A05G1491	Gh_D05G1662	Cotton_A_04649	Gorai.009G182200	3.82	4.57	7.11	5.01	4.36	6.22	7.9	9.51	10.3	13.52	4.33	7.42
PrxR1	Gh_A04G0493	Gh_D04G0917	Cotton_A_39780	Gorai.009G397800	77.82	48.35	39.33	46.38	72.43	66.9	49.5	69.33	149.04	122.79	26.17	38.5
PrxR5a	Gh_A10G1567	Gh_D10G1825	Cotton_A_21231	Gorai.011G204600	0.9	1.08	0.27	106.81	3.91	1.35	0.55	280.59	1.8	5.14	1.27	44.82
PrxR6		Gh_D05G0244	Cotton_A_11172	Gorai.009G026300	NA	NA	NA	NA	4.01	1.64	18.69	13.91	1.75	0.59	2.5	35.14
PrxR8	Gh_A08G2151	Gh_D08G2518	Cotton_A_14514	Gorai.004G280800	528.13	565.86	193.3	300.27	173.66	125.27	55.85	144.18	887.84	973.46	274.02	503.9
PrxR10	Gh_A01G1793	Gh_D01G2034	Cotton_A_00515	Gorai.002G243200	30.52	26.81	33.01	43.84	39.19	50.88	16.36	34.09	61.78	54.8	101.4	81.84
PrxR11	Gh_A10G1104	Gh_D10G1403	Cotton_A_29838	Gorai.011G158200	119.31	80.27	61.11	66.29	69.26	30.91	23	27.51	611.86	697.28	30.9	14.98
PrxR12	Gh_A08G2202	Gh_D08G2567	Cotton_A_11865	Gorai.004G285400	0.33	0	2.27	0.61	3.46	0.62	3.89	2.3	1.14	0	3.01	3.03
Trx1	Gh_A01G0392	Gh_D01G2342	Cotton_A_35156	Gorai.002G061800	4.09	4.94	1.48	5.66	4.99	5.77	1.93	6.48	4.93	3.14	5.19	2.62
Trx2	Gh_A09G0941	Gh_D09G0972	Cotton_A_34784	Gorai.006G116100	37.65	35.22	20.4	16.65	35.97	32.09	29.9	24.67	290.06	196.76	48.74	46.97
Trx3	Gh_A04G0602	Gh_D04G1063	Cotton_A_25417	Gorai.009G414400	8.25	5.14	1.33	1.26	7.12	1.28	5.27	2.19	156.06	52.72	11.04	8.56
Trx4	Gh_A09G1367		Cotton_A_29674	Gorai.006G162600	11.55	8.92	8.86	4.93	NA	NA	NA	NA	79.19	44.76	0.49	0.9
Trx6	Gh_A01G0370	Gh_D01G2331	Cotton_A_29425	Gorai.002G053700	3.75	3.26	4.44	4.19	6.42	6.7	5.17	4.04	12.95	19.22	17.46	18.46
Trx7	Gh_A04G0936	Gh_D04G1453	Cotton_A_34846	Gorai.012G134400	72.41	64.83	34.23	15.31	77.76	76.15	38.48	33.56	1659.78	1058.16	321.73	212.54
Trx8	Gh_A01G2026	Gh_D13G0608		Gorai.011G179300	0	0	0	0	7.26	3.52	8.1	3.42	NA	NA	0	0
Trx9			Cotton_A_26492	Gorai.013G069500	NA	NA	NA	NA	NA	NA	NA	NA	27.82	28.93	21.36	25.27
Trx11	Gh_A03G1039		Cotton_A_21246		6.05	11.55	16.62	11.44	NA	NA	NA	NA	0	0	NA	NA
Trx12	Gh_A10G1673	Gh_D10G1930	Cotton_A_24493	Gorai.011G216600	3.08	1.99	7.78	6.64	3.27	1.99	7.35	2.65	40.97	43.67	8.35	2.23
Trx13	Gh_A13G0947	Gh_D13G1199	Cotton_A_23278	Gorai.013G132000	9.91	8.29	7.65	10.29	2.53	10.74	21.75	13.57	21.83	39.99	28.33	28.68
Trx14	Gh_A03G1663	Gh_D02G2078	Cotton_A_00791	Gorai.005G237300	4.91	5.53	11.81	8.47	3.98	2.34	6.68	6.12	11.36	22.84	9.26	11.69
Trx15	Gh_A12G0210	Gh_D12G0212	Cotton_A_10768	Gorai.008G024500	10.69	9.28	2.82	5.85	22.02	18.79	22.8	20.51	49.17	49.22	39.73	44.81
Trx16	Gh_A04G0896	Gh_D04G1401	Cotton_A_14928	Gorai.012G129200	4.15	6.03	5.04	1.56	9.16	13.34	50.81	23.13	17.6	39.44	41.89	55.38
Trx17	Gh_A04G0254	Gh_D05G3451	Cotton_A_13692	Gorai.009G390500	28.15	44.69	43.33	26.6	15.05	10.8	23.99	17.36	41.07	97.01	7.54	16.43
Trx18	Gh_A13G1237	Gh_D13G1537	Cotton_A_16801	Gorai.013G168000	10.18	13.65	18.34	15.7	2.86	1.62	1.11	4.15	29.94	100.71	0	0.01
Trx21	Gh_A02G0699	Gh_D02G0744	Cotton_A_19603	Gorai.005G083300	0.41	0	0.76	0.36	0.21	0.37	0	0.36	3.92	3.43	0.98	0.18
Trx22	Gh_A05G1744	Gh_D05G1938	Cotton_A_08647	Gorai.009G211800	0	0	0	0	0.63	0	3.31	3.08	0.66	2.67	0.82	0.41
Trx23	Gh_A03G1112	Gh_D02G1538	Cotton_A_39577	Gorai.005G169900	41.04	26.9	14.58	12.91	91.69	63.09	18.28	19.12	120.53	54.46	63.91	44.18
Trx24	Gh_A05G2534	Gh_D05G2811		Gorai.009G311900	6.32	4.34	1.64	1.67	6.44	5.07	2.01	1.09	NA	NA	3.63	3.03
Trx25	Gh_A04G1345	Gh_D04G0855	Cotton_A_37690	Gorai.012G099700	2.37	0.71	8.58	6.64	5.54	4.75	8.5	7.74	20.43	37.17	0.82	0
Trx26	Gh_A11G0026	Gh_D11G0024	Cotton_A_07613	Gorai.007G003400	15.81	11.78	23.17	25.22	23	20.09	21.53	22.19	70.36	129.69	7.94	13.12
Trx27			Cotton_A_07614		NA	NA	NA	NA	NA	NA	NA	NA	17.25	106.75	NA	NA
Trx28			Cotton_A_09913	Gorai.004G201800	NA	NA	NA	NA	NA	NA	NA	NA	448.8	233.54	0	11.65
Trx29	Gh_A03G0712	Gh_D02G0962	Cotton_A_38006	Gorai.005G110000	10.42	18.4	17.66	20.6	8.19	15.09	14.31	7.25	65.63	91.37	12.17	11.42
Trx31	Gh_A01G0925	Gh_D01G0969	Cotton_A_32417	Gorai.002G126200	14.22	13.2	12.49	32.37	52.92	106.94	26.96	48.38	361.66	213.23	264.08	59.18
Trx32	Gh_A10G0871	Gh_D10G0883	Cotton_A_17053	Gorai.011G100200	241.69	290.65	137.9	122.87	0.82	0	0	0.7	1196.69	806.04	16.54	65.34
Trx33	Gh_A11G1655	Gh_D11G1815		Gorai.007G198800	0.42	2.14	6.46	5.49	21.18	36.26	6.5	3.09	NA	NA	1.27	0
Trx34	Gh_A05G1428	Gh_D05G1600	Cotton_A_04712	Gorai.009G175900	42.45	9.87	146.94	204.94	12.02	5.71	85.3	91.93	259.55	1004.53	47.4	60.03
Trx35	Gh_A01G0565	Gh_D01G0574	Cotton_A_30566	Gorai.002G081800	0	0	2.69	3.56	0	0	0	0.88	0	0	0	0
Trx36		Gh_D06G1943	Cotton_A_15590	Gorai.010G219600	NA	NA	NA	NA	7.17	10.95	1.07	1.55	7.19	5.66	0.19	0.88
Trx37	Gh_A09G2271	Gh_D09G2058	Cotton_A_12459	Gorai.006G235800	2.63	4.25	19.63	22.18	1.27	1.13	3.4	4.68	48.35	382.95	6.77	19.2
Trx38	Gh_A10G1358	Gh_D10G1112	Cotton_A_19954	Gorai.011G125000	60.96	68.45	11.35	11.67	86.51	124.48	16.66	14.6	290.9	134.56	92.69	29.83
Trx39	Gh_A05G2809	Gh_D05G3114	Cotton_A_30823	Gorai.009G346700	2.56	5.06	36.36	20.86	1.69	3.38	26.15	8.33	31.7	44.6	7.83	9.28
Trx40	Gh_A09G0209	Gh_D09G0198	Cotton_A_25024	Gorai.006G023700	58.68	32.76	52.94	33.63	124.09	168.92	74.57	54.7	1978.65	862.71	125.78	80.64
Trx41	Gh_A05G3165	Gh_D04G0461	Cotton_A_29008	Gorai.012G055800	15.73	23.22	3.88	6.8	140.18	113.69	43.79	43.94	638.03	191.43	213.64	100.81
Trx42	Gh_A04G0941	Gh_D04G1456	Cotton_A_34850	Gorai.012G134800	1.72	3.04	7.88	2.48	1.97	1.73	3.24	1.86	10.89	12.14	6.48	8.6
Trx43	Gh_A05G3692	Gh_D05G2311	Cotton_A_33939	Gorai.009G254900	5.61	4.25	5.85	3.87	5.82	4.71	3.4	4.77	38.99	75.4	2.73	3.64
Trx44		Gh_D02G1432	Cotton_A_29887	Gorai.005G159700	NA	NA	NA	NA	9.69	13.16	31.85	21.77	0.81	2.67	15.72	25.69
Trx44b			Cotton_A_29893		NA	NA	NA	NA	NA	NA	NA	NA	13.77	13.52	NA	NA
Trx44a	Gh_A03G1037			Gorai.005G159300	6.21	6.52	4.59	4.24	NA	NA	NA	NA	NA	NA	0	0
Trx46	Gh_A08G0527	Gh_D08G0621	Cotton_A_27006	Gorai.004G069600	6.76	8.65	6.99	6.51	5.02	4.61	9.07	7.05	20.57	17.32	7.28	6.18
Trx47	Gh_A06G0633	Gh_D06G0720	Cotton_A_18057	Gorai.010G082200	0.76	1.43	4.39	2.07	3.05	3.73	4.99	4.16	3.34	5.93	4.27	3.82
Trx49		Gh_D12G1760	Cotton_A_13398	Gorai.008G194300	NA	NA	NA	NA	3.93	14.14	21.16	20.68	9.39	96.02	11.33	28.47
Trx50	Gh_A13G0827	Gh_D13G1071	Cotton_A_35056	Gorai.013G117900	23.94	40.5	19.32	23.41	23.27	32.04	18.3	21.3	114.61	70.59	18.58	18.94
Trx51	Gh_A13G1441	Gh_D13G1757	Cotton_A_24227	Gorai.013G192000	2.18	0.21	1.93	0.9	1.25	0.21	0.21	0.9	3.99	4.24	1.68	0.65
Trx52	Gh_A11G2160	Gh_D11G2462	Cotton_A_18118	Gorai.007G267200	10.45	3.57	3.82	7.64	14.81	10.99	15.55	12.28	9.96	148.09	6.17	13.18
Trx53	Gh_A09G1503	Gh_D09G1514	Cotton_A_02455	Gorai.006G177900	8.07	5.21	2.57	3.24	2.64	1.57	0.97	1.66	18.14	13.28	13.45	3.4
Trx54	Gh_A10G0803	Gh_D10G0960	Cotton_A_06428	Gorai.011G108500	11.72	17.71	17.34	10.91	8.19	10.11	8.17	4.38	8.84	13.61	10.21	13.52
Trx55		Gh_D12G0740	Cotton_A_32580	Gorai.008G085700	NA	NA	NA	NA	3.07	12.47	1.63	0.45	2.58	2.39	5.68	15.91
Trx58	Gh_A11G0490	Gh_D11G0568	Cotton_A_10879	Gorai.007G061400	0.9	0.87	0.71	0	5.53	11.55	6.56	1.61	0.91	0	1.92	0.72
Trx60	Gh_A09G0014	Gh_D09G0012	Cotton_A_20576	Gorai.006G001700	6.12	6.03	2.32	2.9	2.11	2	3.21	1.65	9.29	9.12	2.53	2.86
Trx61	Gh_A08G2076	Gh_D08G2653	Cotton_A_20155	Gorai.004G272300	3.18	2.05	1.44	2.8	4	2.26	2.05	3.57	5.34	1.91	0	0.59
GLR3		Gh_D10G1672	Cotton_A_33880	Gorai.011G187400	NA	NA	NA	NA	0	0	0	0	0	2.98	0	0
GLR7	Gh_A11G1070	Gh_D11G1223	Cotton_A_08285	Gorai.007G130700	0	0	0	0.44	0.54	0	2.64	1.31	0	6.87	0	0.35
GLR9	Gh_A08G1019	Gh_D08G1293	Cotton_A_34669	Gorai.004G141100	0	0.91	0	0.46	0	0	0	1.37	3.93	0	0.45	1.93
GLR11	Gh_A11G0180	Gh_D11G0190	Cotton_A_02331	Gorai.007G021200	17.75	19.95	18.5	5.45	6.05	4.19	10.91	5.12	135.67	82.7	27.8	17.49
GLR12	Gh_A09G2433	Gh_D09G1570	Cotton_A_22338	Gorai.006G183400	2.97	2.61	2.22	4.11	2.61	1.95	0.89	3.69	8.99	5.49	6.04	7.14
GLR13	Gh_A10G0680	Gh_D10G0706	Cotton_A_11804	Gorai.011G080700	70.5	34.68	26.98	15.91	75.86	47.23	33.61	19.06	821.75	278.3	13.54	25.94
GLR14	Gh_A10G0246	Gh_D10G0226	Cotton_A_03894	Gorai.011G027200	10.05	8.56	9.46	9.49	26.16	22.45	17.93	17.64	124.94	58.05	11.75	15.52
GLR15	Gh_A05G1984	Gh_D05G3813	Cotton_A_16145	Gorai.009G241100	1.04	3.29	6.48	11.73	2.02	9.96	8.37	11.77	14.46	10.52	0	6.97
GLR20	Gh_A12G2492	Gh_D12G2620	Cotton_A_26603	Gorai.008G296500	3.16	5.66	15.31	32.14	1.88	6.54	28.17	25.39	14.7	68.91	10.2	25.08
GLR21	Gh_A09G0271	Gh_D09G0272	Cotton_A_28983	Gorai.006G031800	92.05	118.5	57.96	79.5	60.84	99.98	99.81	96.85	866.13	1471.52	0	0.56
GLR22	Gh_A08G0733	Gh_D08G0870	Cotton_A_34680	Gorai.004G096800	174.45	132.37	27.98	27.13	160.64	85.83	60.08	44.18	973.21	381.15	0	49.44
GLR23	Gh_A10G0874	Gh_D10G0879	Cotton_A_24192	Gorai.011G099900	77.82	120.19	34.08	20.9	80.35	135.74	24.01	32.42	447.8	347.79	12.2	15.18
GLR24	Gh_A07G1852	Gh_D07G2061	Cotton_A_05898	Gorai.001G236100	2.14	2.39	0.8	1.91	2.77	0	0.4	0.95	12.6	20	2.46	2.01
GLR25	Gh_A11G1243	Gh_D11G1390	Cotton_A_02975	Gorai.007G151300	8.87	5.89	14.27	9.24	10.02	5.01	6.01	7.38	26.06	38.78	8.42	11.71
GLR26	Gh_A08G1017	Gh_D08G1291	Cotton_A_34665	Gorai.004G140900	0	0	0	0	0.57	0	2.86	1.86	0	0	0	0.35
GLR30	Gh_A08G0666	Gh_D08G0767	Cotton_A_13925	Gorai.004G086400	0	0	0	0	0	0	0	0	26.33	2.12	0	0
GLR32	Gh_A12G0064	Gh_D12G0079	Cotton_A_23656	Gorai.008G008600	0	0.97	0	0	0	0	0	0	2.07	0	0.31	0
GLR35	Gh_A08G2216	Gh_D08G2582	Cotton_A_11881	Gorai.004G286800	13.97	31.13	0.48	0.44	1.09	1.49	0	0.93	43.65	3.01	8.46	10.43
GLR37	Gh_A05G0320	Gh_D05G0426	Cotton_A_14014	Gorai.009G044100	0.85	0	0	0	0.86	0.52	0	2.67	3.75	2.43	2.78	3.52
GLR41	Gh_A10G0264	Gh_D10G0264	Cotton_A_03931	Gorai.011G030700	0.56	0	0	2.71	0	0	0	0.9	0.85	25.86	0.3	1.07
GLR42	Gh_A03G1365	Gh_D02G1805	Cotton_A_30221	Gorai.005G198800	0.31	0	2.78	4.93	3.9	3.64	8.67	51.18	0	0	25.46	28.72
GLR43	Gh_A05G1338	Gh_D05G1507	Cotton_A_11312	Gorai.009G166200	0.61	0	0.52	4.9	0.61	1.51	0	0.49	2.09	24.44	17.31	7.75
PER2	Gh_A09G1415	Gh_D09G1420	Cotton_A_12086	Gorai.006G168000	1.75	3.71	31.22	9.87	0.1	0.36	6.3	5.6	7.7	20.34	0	66.91
PER3	Gh_A05G1452	Gh_D05G1626	Cotton_A_04686	Gorai.009G178400	242.17	115.5	6.43	522.95	13.75	23.57	6.06	755.92	1432.63	624.34	340.13	44.08
PER11	Gh_A07G1997	Gh_D07G2217	Cotton_A_19460	Gorai.001G259400	7.05	19.54	0.61	2.15	11.37	15.03	0.61	0.37	388.17	65.56	20.07	6.34
PER12	Gh_A05G3141		Cotton_A_23460	Gorai.012G059300	0.56	0.6	0	2.95	NA	NA	NA	NA	10.96	6.08	9.24	6.12
PER19	Gh_A10G0810	Gh_D10G0951	Cotton_A_06419	Gorai.011G107800	2.87	2.31	63.32	22.86	3.75	5.12	0.74	0.94	3.09	2.55	6.49	3.33
PER20	Gh_A02G1466	Gh_D03G0246	Cotton_A_09755	Gorai.003G029000	1.55	5.74	7.73	27.85	0.42	1.12	2.9	6.53	12.66	13.22	21.84	0.3
PER21	Gh_A12G0695	Gh_D12G0699	Cotton_A_38803	Gorai.008G080800	0	0	0	0	4.08	17.66	44.13	21.86	0	0	8.63	16.12
PER22	Gh_A05G2945		Cotton_A_31530	Gorai.012G086300	1.28	0.58	194.74	71.75	NA	NA	NA	NA	3.87	10.25	0	0.94
PER23	Gh_A07G2109	Gh_D07G2320	Cotton_A_28610	Gorai.001G271800	1.78	1.39	0	0.19	0.34	0	0	0.19	0.54	0.57	0.85	18.26
PER26	Gh_A07G0012	Gh_D07G0019	Cotton_A_28176		0.78	1.79	31.16	7.48	0	0.36	11.58	3.17	14.22	168.24	NA	NA
PER31	Gh_A05G0661	Gh_D05G0807	Cotton_A_13869	Gorai.009G084400	0	0	0	0	0.1	0	0	0	0.27	3.67	0	1.77
PER32	Gh_A02G0927	Gh_D02G1110	Cotton_A_29791	Gorai.005G126200	0.2	1.05	0	0.51	0.89	1.93	0.91	0.5	0.66	2.05	2.41	4.76
PER33	Gh_A01G1487	Gh_D01G1726	Cotton_A_25132	Gorai.002G208800	0.1	0.18	0	0.79	0.41	0	0.19	0.97	1.7	0.45	7.73	0
PER34	Gh_A05G2347		Cotton_A_18127		1.78	0	3.77	4.66	NA	NA	NA	NA	0	0	NA	NA
PER35	Gh_A11G2169		Cotton_A_04004		0	0	0	0.45	NA	NA	NA	NA	0.82	6.88	NA	NA
PER36			Cotton_A_01354		NA	NA	NA	NA	NA	NA	NA	NA	1.79	3.06	NA	NA
PER37		Gh_D03G0641		Gorai.003G090000	NA	NA	NA	NA	0	2.12	0.31	0	NA	NA	0	0
PER38	Gh_A02G1203	Gh_D03G0643	Cotton_A_39374	Gorai.003G088700	19.16	623.88	5.31	1.12	0	0.31	0.65	0.29	119.7	196.8	2.93	9.32
PER39	Gh_A05G0093	Gh_D05G0154	Cotton_A_11452	Gorai.009G017700	1.08	1.54	1.65	2.73	6.15	19.97	1.01	4.25	8.1	29.63	0.57	1.53
PER40	Gh_A08G2028	Gh_D08G2420	Cotton_A_05819	Gorai.004G265900	2.14	3.25	0.21	27.67	0.54	0.19	0.21	1.66	0.58	0	0	0.38
PER44	Gh_A04G1453	Gh_D04G1593	Cotton_A_06359	Gorai.012G150400	0	0	0	0	0	0	3.65	2.04	0	0	0.16	0.51
PER46	Gh_A05G3489	Gh_D04G0130	Cotton_A_06005	Gorai.012G016200	0.78	0.36	0.19	0.94	0.68	0.36	0.75	3.2	10.14	1.72	0	0
PER47	Gh_A13G0039		Cotton_A_15755	Gorai.009G295200	0.31	0	7.9	72.67	NA	NA	NA	NA	0	38.17	0	0
PER48			Cotton_A_40362	Gorai.013G005800	NA	NA	NA	NA	NA	NA	NA	NA	0	0.2	3.05	7.89
PER51	Gh_A11G0400	Gh_D11G0463	Cotton_A_02009	Gorai.007G049900	0.77	4.35	0	0.43	0.1	2.95	0	0	23.45	0	0.14	0.56
PER52				Gorai.007G070800	NA	NA	NA	NA	NA	NA	NA	NA	NA	NA	0	7.9
PER54	Gh_A11G1669	Gh_D11G1824	Cotton_A_14678	Gorai.007G199700	0.88	0.18	0.19	0	1.04	0.94	0	0.09	5.16	1.42	0.26	0.74
PER55	Gh_A05G1635	Gh_D05G1817	Cotton_A_07846	Gorai.009G198700	0	0	0	0	0.29	0.52	0	0	2.25	21.29	0	0.09
PER56	Gh_A12G1915	Gh_D12G2095	Cotton_A_07879	Gorai.008G228500	0	0	6.06	4.08	0.1	0	10.34	4.84	0.57	8.87	0	44.29
PER57	Gh_A03G0944	Gh_D02G1327	Cotton_A_32534	Gorai.005G148900	0.49	3.44	0.19	0	0.1	0.9	0	0.17	0.56	0.69	0	44.18
PER58	Gh_A12G2622	Gh_D12G1577	Cotton_A_06224	Gorai.008G174200	0.09	0.51	0	0	0.1	0	0	0.04	1.42	0	0	38.66
PER59	Gh_A12G0795	Gh_D12G0788	Cotton_A_35302	Gorai.008G090200	5.94	5.29	4.94	4.37	3.67	4.77	2.47	1.57	79.32	35.92	5.18	4.38
PER60	Gh_A11G1859	Gh_D11G2151	Cotton_A_36159	Gorai.007G234600	0.11	0	9.52	2.37	0.1	0.38	1.56	0.73	0.58	3.17	7.7	7.66
PER61	Gh_A06G1006	Gh_D06G1200	Cotton_A_36217	Gorai.010G131800	1.8	0.58	0.2	3.64	18.71	3.3	0.39	2.74	14.9	1.2	2.26	4.46
PER62	Gh_A02G0651	Gh_D02G0695	Cotton_A_10391	Gorai.005G077600	0.41	0.18	0.2	0	0.66	10.96	0.9	0.24	8.23	1.42	131.87	1.04
PER63	Gh_A05G1577	Gh_D05G1755	Cotton_A_16449	Gorai.009G192200	0	0	5.27	6.34	0.11	0.2	4.88	3.09	0.6	19.9	0.71	1.91
PER64	Gh_A06G0019		Cotton_A_18230	Gorai.010G001900	0.11	0.39	0.41	1.79	NA	NA	NA	NA	1.52	168.68	1.66	3.68
PER65	Gh_A02G1663	Gh_D03G0059	Cotton_A_01533	Gorai.003G006600	0.21	0.2	18.64	2	0.43	0.59	158.26	16.11	11.97	112.21	5.98	29.05
PER66	Gh_A05G3239		Cotton_A_40805	Gorai.012G046400	0.7	0.72	1.49	0.26	NA	NA	NA	NA	2.77	3.65	0.67	0.2
PER74	Gh_A12G1441	Gh_D12G1559	Cotton_A_31063	Gorai.008G172200	0	1.11	0.38	0.53	0	0	0.38	0.44	4.26	15.25	0.85	1.35
PER75	Gh_A03G0960	Gh_D02G1345	Cotton_A_22835	Gorai.005G150500	0.14	0.26	8.43	10.89	0	0	0	0	0	0	0	0
PER79		Gh_D02G1346	Cotton_A_22834	Gorai.005G150600	NA	NA	NA	NA	1.78	8.81	52.72	51.25	6.59	12.05	26.18	22.31
PER80	Gh_A07G0275	Gh_D07G0331	Cotton_A_19224	Gorai.001G039200	0.1	0	0	2.07	0.1	0	0	1.91	0	0	0	0.36
PER81	Gh_A05G0507	Gh_D05G0626	Cotton_A_01150	Gorai.009G064700	159.86	174.98	0	10.38	46.54	48.08	0.38	8.32	436.24	32.12	8.18	1.12

## Sheet: Sheet2
	G. hirsutum_A subgenome				G. hirsutum_D subgenome				G. arboretum		G. raimondii					G. hirsutum_A subgenome		G. hirsutum_D subgenome		G. arboretum		G. raimondii
104	6.05	11.55	16.62	11.44	NA	NA	NA	NA	0	0	NA	NA				10 DPA	20 DPA	10 DPA	20 DPA	10 DPA	20 DPA	10 DPA	20 DPA
120	NA	NA	NA	NA	NA	NA	NA	NA	17.25	106.75	NA	NA			GrCSD1	15.39	18.4	15.96	16.94	115.83	161.02	2.17	3.7
138	NA	NA	NA	NA	NA	NA	NA	NA	13.77	13.52	NA	NA			GrCSD2	889.89	175.3	633.83	141	2376.42	1963.18	0	1.79
228	0.78	1.79	31.16	7.48	0	0.36	11.58	3.17	14.22	168.24	NA	NA			GrCSD3	59	17.5	74.26	19.91	190.19	129.14	0	0
235	1.78	0	3.77	4.66	NA	NA	NA	NA	0	0	NA	NA			GrCSD5	0.62	0.96	0	0	9.82	12.91	0	0
236	0	0	0	0.45	NA	NA	NA	NA	0.82	6.88	NA	NA			GrCSD6	120.79	77.25	335.46	141.89	1130.82	615.44	9.21	10.11
237	NA	NA	NA	NA	NA	NA	NA	NA	1.79	3.06	NA	NA			GrMSD1	178.71	58.74	50.18	64.2	417.83	392.63	28.48	58.26
	0.61	0	0.52	4.9	0.61	1.51	0	0.49	2.09	24.44	17.31	7.75			GrMSD2	199.74	60.63	99.59	22.49	375.09	214.62	51.73	34.93
GrAOX2	7.35	48.9	13.67	9.98	NA	NA	NA	NA	46.18	23.14	5.37	4.07			GrFSD1	0.94	1.71	3.16	4.93	8.25	4.03	0	0
GrAOX3	0	0.32	0	0.47	0.36	1.3	0	0.95	3.63	0.45	1.26	0.62			GrFSD2	0.47	8.04	0.47	1.72	2.93	11.21	0	0
GrAOX4	3.82	4.57	7.11	5.01	4.36	6.22	7.9	9.51	10.3	13.52	4.33	7.42			GrAPX3	28.56	49.38	22.69	28.33	56.39	174.27	5.25	29.67
GrAPX1	0	0.81	0	0.39	0.56	0	0	0	2.91	0.29	0	0.56			GrAPX11	195.22	55.28	50.59	28.05	220.7	180.08	0	0.14
GrAPX10	1.51	0.81	2.21	3.87	5.2	4.7	3.71	6.03	207.04	87.71	1.3	0			GrGPX4	120.23	75.03	113.14	18.9	316.99	134.14	0	0
GrAPX11	193.55	195.22	55.28	57.52	40.07	50.59	28.05	25.69	220.7	180.08	0	0.14			GrGPX7	17.01	20.67	17.04	20.2	138.34	87.01	0	2
GrAPX12	0.14	0.51	11.54	5.07	0	0	0	0.12	4.31	60.08	2.74	1.56			GrGPX8	31.53	11.91	27.21	17.01	344.85	113.14	0.27	0.2
GrAPX2	0.92	1.3	3.86	2.96	0.61	0.74	1.15	0.8	0.9	1.6	0.62	1.5			GrTrx18	13.65	18.34	1.62	1.11	29.94	100.71	0	0.01
GrAPX3	28	28.56	49.38	38.08	23.74	22.69	28.33	20.31	56.39	174.27	5.25	29.67			GrGLR15	3.29	6.48	9.96	8.37	14.46	10.52	0	6.97
GrAPX4	0	0	0	0	0.15	0	0.28	0.38	9.15	6.61	0	0			GrGLR21	118.5	57.96	99.98	99.81	866.13	1471.52	0	0.56
GrAPX5	1179.51	1341.92	102.97	134.21	511.55	706.14	117.06	170.81	1374.88	1028.72	178.67	118.33			GrGLR22	132.37	27.98	85.83	60.08	973.21	381.15	0	49.44
GrAPX6	197.05	78.2	66.51	37.9	164.46	91.77	42.89	32.68	101.79	75.69	28.99	17.35			GrGLR23	120.19	34.08	135.74	24.01	447.8	347.79	12.2	15.18
GrAPX7	3.03	2.59	0.59	0.48	2.55	1.66	0.86	1.2	NA	NA	2.79	2.81			GrGR3	4.45	9.07	6.79	6.83	9.32	11.7	0.38	0.38
GrAPX8	3.54	3.6	1.18	2.44	11.06	9.88	0.93	0.86	19.95	8.56	1.65	0			GrFER4	6.52	4.09	15.62	0.92	276.41	236.13	0.49	0
GrAPX9	55.34	66.95	22.9	39.11	16.33	18.27	30.68	35.98	92.48	55.83	7.06	6.66			GrAOX2	48.9	13.67	NA	NA	46.18	23.14	5.37	4.07
GrCAT1	58.84	120.92	104.64	89.44	53.5	128.35	116.52	99.86	121.18	174.79	67.81	126.93			GrFRO2	3	12.85	0.32	9.85	4.53	12.05	0.77	21.17
GrCAT3	1.32	2.91	2.1	4.9	29.22	35.58	25.92	25.08	0	1.82	13.54	31.47			GrFRO5	3.36	3.35	5.93	4.7	2.07	3.02	3.76	14.63
GrCAT4	0.08	0.14	0	0	0	0.13	0	0.13	0	1.94	0.4	11			GrFRO6	51.91	39.81	51.88	29.65	766.69	386.01	128.91	98
GrCSD1	18.92	15.39	18.4	11.16	16.19	15.96	16.94	7.11	115.83	161.02	2.17	3.7			GrRBOH1	0.29	4.49	0.17	0.42	1.22	10.42	1.06	13.99
GrCSD2	420.87	889.89	175.3	278.4	380.33	633.83	141	274.96	2376.42	1963.18	0	1.79			GrRBOH3	0.11	1.78	2	12.18	0.29	1.65	7.87	4.01
GrCSD3	36.17	59	17.5	18.04	54.27	74.26	19.91	27.38	190.19	129.14	0	0			GrRBOH6	0	0.18	1.06	3.75	0.83	0.6	2.31	4.84
GrCSD5	3.56	0.62	0.96	2.34	0	0	0	0.18	9.82	12.91	0	0			GrRBOH7	0.78	3.99	1.12	0.47	1.64	2.71	2.06	0.37
GrCSD6	132.03	120.79	77.25	68.17	352.74	335.46	141.89	131.16	1130.82	615.44	9.21	10.11			GrRBOH8	2.19	17.77	5.07	26.18	5.51	8.39	0.83	0.69
GrDHAR1	6.74	3.28	3.9	25.79	96.76	160.15	4.28	46.71	10.14	17.29	325.38	55.64			GrRBOH11	2.63	2.86	1.52	1.37	0.36	0.14	0.94	0.07
GrDHAR2	211.9	268.04	27.37	56.19	975.38	769.01	68.27	87.44	1159.9	410.55	674.28	54.51
GrDHAR3	12.53	8.95	3.64	6.17	11.19	5.55	7.13	9.52	18.48	10.52	28.98	15.99
GrDHAR4	9.31	11.59	13.43	14.36	18.28	10.19	23.38	23.35	68.84	91.92	7.8	2.38
GrDHAR5	33.53	32.1	34.99	32.7	49.88	73.46	61.47	40.13	755.93	767.49	136.8	71.05
GrFER2	0.23	0	6.55	5.45	1.15	0.95	20.55	53.05	1.92	11.92	1.34	24.3
GrFER3	30.62	59.14	4.7	41.15	55.6	167.32	1.4	54.07	104.83	774.53	51.14	13.22
GrFER4	13.49	6.52	4.09	24.03	28.71	15.62	0.92	10.66	276.41	236.13	0.49	0
GrFER5	NA	NA	NA	NA	NA	NA	NA	NA	NA	NA	16.16	2.17
GrFER6	NA	NA	NA	NA	25.27	16.56	10.76	12.85	36.46	19.78	7.06	4.18
GrFRO1	0.25	0.43	0	0	0.25	1.74	0	0	0	0	2.85	2.35
GrFRO2	2.58	3	12.85	8.51	0.13	0.32	9.85	5.34	4.53	12.05	0.77	21.17
GrFRO5	2.73	3.36	3.35	2.28	5.97	5.93	4.7	2.73	2.07	3.02	3.76	14.63
GrFRO6	71.46	51.91	39.81	35.91	76.37	51.88	29.65	30.26	766.69	386.01	128.91	98
GrFSD1	2.49	0.94	1.71	2.52	4.63	3.16	4.93	37.22	8.25	4.03	0	0
GrFSD2	2.31	0.47	8.04	3.39	2.71	0.47	1.72	2.85	2.93	11.21	0	0
GrGLR11	17.75	19.95	18.5	5.45	6.05	4.19	10.91	5.12	135.67	82.7	27.8	17.49
GrGLR12	2.97	2.61	2.22	4.11	2.61	1.95	0.89	3.69	8.99	5.49	6.04	7.14
GrGLR13	70.5	34.68	26.98	15.91	75.86	47.23	33.61	19.06	821.75	278.3	13.54	25.94
GrGLR14	10.05	8.56	9.46	9.49	26.16	22.45	17.93	17.64	124.94	58.05	11.75	15.52
GrGLR15	1.04	3.29	6.48	11.73	2.02	9.96	8.37	11.77	14.46	10.52	0	6.97
GrGLR20	3.16	5.66	15.31	32.14	1.88	6.54	28.17	25.39	14.7	68.91	10.2	25.08
GrGLR21	92.05	118.5	57.96	79.5	60.84	99.98	99.81	96.85	866.13	1471.52	0	0.56
GrGLR22	174.45	132.37	27.98	27.13	160.64	85.83	60.08	44.18	973.21	381.15	0	49.44
GrGLR23	77.82	120.19	34.08	20.9	80.35	135.74	24.01	32.42	447.8	347.79	12.2	15.18
GrGLR24	2.14	2.39	0.8	1.91	2.77	0	0.4	0.95	12.6	20	2.46	2.01
GrGLR25	8.87	5.89	14.27	9.24	10.02	5.01	6.01	7.38	26.06	38.78	8.42	11.71
GrGLR26	0	0	0	0	0.57	0	2.86	1.86	0	0	0	0.35
GrGLR3	NA	NA	NA	NA	0	0	0	0	0	2.98	0	0
GrGLR30	0	0	0	0	0	0	0	0	26.33	2.12	0	0
GrGLR32	0	0.97	0	0	0	0	0	0	2.07	0	0.31	0
GrGLR35	13.97	31.13	0.48	0.44	1.09	1.49	0	0.93	43.65	3.01	8.46	10.43
GrGLR37	0.85	0	0	0	0.86	0.52	0	2.67	3.75	2.43	2.78	3.52
GrGLR41	0.56	0	0	2.71	0	0	0	0.9	0.85	25.86	0.3	1.07
GrGLR42	0.31	0	2.78	4.93	3.9	3.64	8.67	51.18	0	0	25.46	28.72
GrGLR7	0	0	0	0.44	0.54	0	2.64	1.31	0	6.87	0	0.35
GrGLR9	0	0.91	0	0.46	0	0	0	1.37	3.93	0	0.45	1.93
GrGPX1	58.78	53.84	33.45	20.24	38.15	46.01	26.22	13.51	89.97	58.09	31.5	26.94
GrGPX2	13.82	16.94	41.53	39.72	3.18	24.67	3.73	4.2	237.38	521.77	4.25	0.81
GrGPX3	11.94	12.3	5.16	3.25	9.57	12.53	4.5	3.51	33.02	12.87	3.31	0
GrGPX4	65.44	120.23	75.03	45.89	52.46	113.14	18.9	21.58	316.99	134.14	0	0
GrGPX5	23.25	17.21	22.75	33.03	21.11	29.88	76.12	67.38	0	0	11.03	3.31
GrGPX6	0.68	0	0.42	5.48	0.29	1.01	1.03	0.24	18.31	9.95	1.63	0.62
GrGPX7	15.94	17.01	20.67	46.32	11.1	17.04	20.2	64.71	138.34	87.01	0	2
GrGPX8	63.72	31.53	11.91	8.04	66.09	27.21	17.01	16.63	344.85	113.14	0.27	0.2
GrGR1	25.18	28.19	16.54	14.68	35.81	51.24	46.23	32.25	54.82	52.98	0.01	3.69
GrGR2	18.81	21.28	18.65	17.27	11.11	8.13	15.31	13.38	76.58	71.63	18.08	26.56
GrGR3	5.54	4.45	9.07	11.65	7.29	6.79	6.83	8.92	9.32	11.7	0.38	0.38
GrMDAR1	113.78	201.75	61.32	59.21	88.96	108.76	53.81	45.57	284.34	216.94	86.96	90.95
GrMDAR2	167.06	227.43	50.45	40.74	221.51	256.61	60.78	53.42	268.65	144.95	45.1	68.5
GrMDAR3	4.32	4.52	12.41	6.5	5.17	4.29	8.02	6.28	9.26	19.5	8.48	13.29
GrMDAR4	30	17.22	9.01	9.75	36.77	24.65	15.18	13.97	72.9	44.96	15.15	19.38
GrMDAR5	0.2	0	0.09	0.35	0.96	2.55	0.9	0.46	27.03	25.96	7.57	7.66
GrMDAR6	NA	NA	NA	NA	0.19	0.34	7.25	6.34	1.16	1.07	0.07	14.69
GrMSD1	160.28	178.71	58.74	135.95	74.82	50.18	64.2	107.76	417.83	392.63	28.48	58.26
GrMSD2	261.03	199.74	60.63	46.12	65.99	99.59	22.49	21.95	375.09	214.62	51.73	34.93
GrPER11	7.05	19.54	0.61	2.15	11.37	15.03	0.61	0.37	388.17	65.56	20.07	6.34
GrPER12	0.56	0.6	0	2.95	NA	NA	NA	NA	10.96	6.08	9.24	6.12
GrPER19	2.87	2.31	63.32	22.86	3.75	5.12	0.74	0.94	3.09	2.55	6.49	3.33
GrPER2	1.75	3.71	31.22	9.87	0.1	0.36	6.3	5.6	7.7	20.34	0	66.91
GrPER20	1.55	5.74	7.73	27.85	0.42	1.12	2.9	6.53	12.66	13.22	21.84	0.3
GrPER21	0	0	0	0	4.08	17.66	44.13	21.86	0	0	8.63	16.12
GrPER22	1.28	0.58	194.74	71.75	NA	NA	NA	NA	3.87	10.25	0	0.94
GrPER23	1.78	1.39	0	0.19	0.34	0	0	0.19	0.54	0.57	0.85	18.26
GrPER3	242.17	115.5	6.43	522.95	13.75	23.57	6.06	755.92	1432.63	624.34	340.13	44.08
GrPER31	0	0	0	0	0.1	0	0	0	0.27	3.67	0	1.77
GrPER32	0.2	1.05	0	0.51	0.89	1.93	0.91	0.5	0.66	2.05	2.41	4.76
GrPER33	0.1	0.18	0	0.79	0.41	0	0.19	0.97	1.7	0.45	7.73	0
GrPER37	NA	NA	NA	NA	0	2.12	0.31	0	NA	NA	0	0
GrPER38	19.16	623.88	5.31	1.12	0	0.31	0.65	0.29	119.7	196.8	2.93	9.32
GrPER39	1.08	1.54	1.65	2.73	6.15	19.97	1.01	4.25	8.1	29.63	0.57	1.53
GrPER40	2.14	3.25	0.21	27.67	0.54	0.19	0.21	1.66	0.58	0	0	0.38
GrPER44	0	0	0	0	0	0	3.65	2.04	0	0	0.16	0.51
GrPER46	0.78	0.36	0.19	0.94	0.68	0.36	0.75	3.2	10.14	1.72	0	0
GrPER47	0.31	0	7.9	72.67	NA	NA	NA	NA	0	38.17	0	0
GrPER48	NA	NA	NA	NA	NA	NA	NA	NA	0	0.2	3.05	7.89
GrPER51	0.77	4.35	0	0.43	0.1	2.95	0	0	23.45	0	0.14	0.56
GrPER52	NA	NA	NA	NA	NA	NA	NA	NA	NA	NA	0	7.9
GrPER54	0.88	0.18	0.19	0	1.04	0.94	0	0.09	5.16	1.42	0.26	0.74
GrPER55	0	0	0	0	0.29	0.52	0	0	2.25	21.29	0	0.09
GrPER56	0	0	6.06	4.08	0.1	0	10.34	4.84	0.57	8.87	0	44.29
GrPER57	0.49	3.44	0.19	0	0.1	0.9	0	0.17	0.56	0.69	0	44.18
GrPER58	0.09	0.51	0	0	0.1	0	0	0.04	1.42	0	0	38.66
GrPER59	5.94	5.29	4.94	4.37	3.67	4.77	2.47	1.57	79.32	35.92	5.18	4.38
GrPER60	0.11	0	9.52	2.37	0.1	0.38	1.56	0.73	0.58	3.17	7.7	7.66
GrPER61	1.8	0.58	0.2	3.64	18.71	3.3	0.39	2.74	14.9	1.2	2.26	4.46
GrPER62	0.41	0.18	0.2	0	0.66	10.96	0.9	0.24	8.23	1.42	131.87	1.04
GrPER63	0	0	5.27	6.34	0.11	0.2	4.88	3.09	0.6	19.9	0.71	1.91
GrPER64	0.11	0.39	0.41	1.79	NA	NA	NA	NA	1.52	168.68	1.66	3.68
GrPER65	0.21	0.2	18.64	2	0.43	0.59	158.26	16.11	11.97	112.21	5.98	29.05
GrPER66	0.7	0.72	1.49	0.26	NA	NA	NA	NA	2.77	3.65	0.67	0.2
GrPER74	0	1.11	0.38	0.53	0	0	0.38	0.44	4.26	15.25	0.85	1.35
GrPER75	0.14	0.26	8.43	10.89	0	0	0	0	0	0	0	0
GrPER79	NA	NA	NA	NA	1.78	8.81	52.72	51.25	6.59	12.05	26.18	22.31
GrPER80	0.1	0	0	2.07	0.1	0	0	1.91	0	0	0	0.36
GrPER81	159.86	174.98	0	10.38	46.54	48.08	0.38	8.32	436.24	32.12	8.18	1.12
GrPrxR1	77.82	48.35	39.33	46.38	72.43	66.9	49.5	69.33	149.04	122.79	26.17	38.5
GrPrxR10	30.52	26.81	33.01	43.84	39.19	50.88	16.36	34.09	61.78	54.8	101.4	81.84
GrPrxR11	119.31	80.27	61.11	66.29	69.26	30.91	23	27.51	611.86	697.28	30.9	14.98
GrPrxR12	0.33	0	2.27	0.61	3.46	0.62	3.89	2.3	1.14	0	3.01	3.03
GrPrxR5a	0.9	1.08	0.27	106.81	3.91	1.35	0.55	280.59	1.8	5.14	1.27	44.82
GrPrxR6	NA	NA	NA	NA	4.01	1.64	18.69	13.91	1.75	0.59	2.5	35.14
GrPrxR8	528.13	565.86	193.3	300.27	173.66	125.27	55.85	144.18	887.84	973.46	274.02	503.9
GrRBOH1	0.31	0.29	4.49	3.95	0.34	0.17	0.42	2.32	1.22	10.42	1.06	13.99
GrRBOH11	1.12	2.63	2.86	13.49	1.19	1.52	1.37	11.59	0.36	0.14	0.94	0.07
GrRBOH13	0	0.14	0	0	0	0	0	0.03	2.09	0.06	0	0.11
GrRBOH14	0	0.41	5.33	1.25	0.37	0.14	0.64	2.07	2.16	3.09	0	0.01
GrRBOH3	0.19	0.11	1.78	2.84	2.18	2	12.18	8.6	0.29	1.65	7.87	4.01
GrRBOH6	0	0	0.18	0	1.61	1.06	3.75	4.32	0.83	0.6	2.31	4.84
GrRBOH7	1.2	0.78	3.99	2.3	1.05	1.12	0.47	0.77	1.64	2.71	2.06	0.37
GrRBOH8	3.12	2.19	17.77	9.12	4.06	5.07	26.18	11.89	5.51	8.39	0.83	0.69
GrTrx1	4.09	4.94	1.48	5.66	4.99	5.77	1.93	6.48	4.93	3.14	5.19	2.62
GrTrx12	3.08	1.99	7.78	6.64	3.27	1.99	7.35	2.65	40.97	43.67	8.35	2.23
GrTrx13	9.91	8.29	7.65	10.29	2.53	10.74	21.75	13.57	21.83	39.99	28.33	28.68
GrTrx14	4.91	5.53	11.81	8.47	3.98	2.34	6.68	6.12	11.36	22.84	9.26	11.69
GrTrx15	10.69	9.28	2.82	5.85	22.02	18.79	22.8	20.51	49.17	49.22	39.73	44.81
GrTrx16	4.15	6.03	5.04	1.56	9.16	13.34	50.81	23.13	17.6	39.44	41.89	55.38
GrTrx17	28.15	44.69	43.33	26.6	15.05	10.8	23.99	17.36	41.07	97.01	7.54	16.43
GrTrx18	10.18	13.65	18.34	15.7	2.86	1.62	1.11	4.15	29.94	100.71	0	0.01
GrTrx2	37.65	35.22	20.4	16.65	35.97	32.09	29.9	24.67	290.06	196.76	48.74	46.97
GrTrx21	0.41	0	0.76	0.36	0.21	0.37	0	0.36	3.92	3.43	0.98	0.18
GrTrx22	0	0	0	0	0.63	0	3.31	3.08	0.66	2.67	0.82	0.41
GrTrx23	41.04	26.9	14.58	12.91	91.69	63.09	18.28	19.12	120.53	54.46	63.91	44.18
GrTrx24	6.32	4.34	1.64	1.67	6.44	5.07	2.01	1.09	NA	NA	3.63	3.03
GrTrx25	2.37	0.71	8.58	6.64	5.54	4.75	8.5	7.74	20.43	37.17	0.82	0
GrTrx26	15.81	11.78	23.17	25.22	23	20.09	21.53	22.19	70.36	129.69	7.94	13.12
GrTrx28	NA	NA	NA	NA	NA	NA	NA	NA	448.8	233.54	0	11.65
GrTrx29	10.42	18.4	17.66	20.6	8.19	15.09	14.31	7.25	65.63	91.37	12.17	11.42
GrTrx3	8.25	5.14	1.33	1.26	7.12	1.28	5.27	2.19	156.06	52.72	11.04	8.56
GrTrx31	14.22	13.2	12.49	32.37	52.92	106.94	26.96	48.38	361.66	213.23	264.08	59.18
GrTrx32	241.69	290.65	137.9	122.87	0.82	0	0	0.7	1196.69	806.04	16.54	65.34
GrTrx33	0.42	2.14	6.46	5.49	21.18	36.26	6.5	3.09	NA	NA	1.27	0
GrTrx34	42.45	9.87	146.94	204.94	12.02	5.71	85.3	91.93	259.55	1004.53	47.4	60.03
GrTrx35	0	0	2.69	3.56	0	0	0	0.88	0	0	0	0
GrTrx36	NA	NA	NA	NA	7.17	10.95	1.07	1.55	7.19	5.66	0.19	0.88
GrTrx37	2.63	4.25	19.63	22.18	1.27	1.13	3.4	4.68	48.35	382.95	6.77	19.2
GrTrx38	60.96	68.45	11.35	11.67	86.51	124.48	16.66	14.6	290.9	134.56	92.69	29.83
GrTrx39	2.56	5.06	36.36	20.86	1.69	3.38	26.15	8.33	31.7	44.6	7.83	9.28
GrTrx4	11.55	8.92	8.86	4.93	NA	NA	NA	NA	79.19	44.76	0.49	0.9
GrTrx40	58.68	32.76	52.94	33.63	124.09	168.92	74.57	54.7	1978.65	862.71	125.78	80.64
GrTrx41	15.73	23.22	3.88	6.8	140.18	113.69	43.79	43.94	638.03	191.43	213.64	100.81
GrTrx42	1.72	3.04	7.88	2.48	1.97	1.73	3.24	1.86	10.89	12.14	6.48	8.6
GrTrx43	5.61	4.25	5.85	3.87	5.82	4.71	3.4	4.77	38.99	75.4	2.73	3.64
GrTrx44a	6.21	6.52	4.59	4.24	NA	NA	NA	NA	NA	NA	0	0
GrTrx44b	NA	NA	NA	NA	9.69	13.16	31.85	21.77	0.81	2.67	15.72	25.69
GrTrx46	6.76	8.65	6.99	6.51	5.02	4.61	9.07	7.05	20.57	17.32	7.28	6.18
GrTrx47	0.76	1.43	4.39	2.07	3.05	3.73	4.99	4.16	3.34	5.93	4.27	3.82
GrTrx49	NA	NA	NA	NA	3.93	14.14	21.16	20.68	9.39	96.02	11.33	28.47
GrTrx50	23.94	40.5	19.32	23.41	23.27	32.04	18.3	21.3	114.61	70.59	18.58	18.94
GrTrx51	2.18	0.21	1.93	0.9	1.25	0.21	0.21	0.9	3.99	4.24	1.68	0.65
GrTrx52	10.45	3.57	3.82	7.64	14.81	10.99	15.55	12.28	9.96	148.09	6.17	13.18
GrTrx53	8.07	5.21	2.57	3.24	2.64	1.57	0.97	1.66	18.14	13.28	13.45	3.4
GrTrx54	11.72	17.71	17.34	10.91	8.19	10.11	8.17	4.38	8.84	13.61	10.21	13.52
GrTrx55	NA	NA	NA	NA	3.07	12.47	1.63	0.45	2.58	2.39	5.68	15.91
GrTrx58	0.9	0.87	0.71	0	5.53	11.55	6.56	1.61	0.91	0	1.92	0.72
GrTrx6	3.75	3.26	4.44	4.19	6.42	6.7	5.17	4.04	12.95	19.22	17.46	18.46
GrTrx60	6.12	6.03	2.32	2.9	2.11	2	3.21	1.65	9.29	9.12	2.53	2.86
GrTrx61	3.18	2.05	1.44	2.8	4	2.26	2.05	3.57	5.34	1.91	0	0.59
GrTrx7	72.41	64.83	34.23	15.31	77.76	76.15	38.48	33.56	1659.78	1058.16	321.73	212.54
GrTrx8	0	0	0	0	7.26	3.52	8.1	3.42	NA	NA	0	0
GrTrx9	NA	NA	NA	NA	NA	NA	NA	NA	27.82	28.93	21.36	25.27
	5 DPA	10 DPA	20 DPA	25 DPA	5 DPA	10 DPA	20 DPA	25 DPA	10 DPA	20 DPA	10 DPA	20 DPA
