# Supplementary material for: Deep Transcriptome Analysis Reveals Reactive Oxygen Species (ROS) Network Evolution, Response to Abiotic Stress, and Regulation of Fiber Development in Cotton
Source: Int J Mol Sci. 2019 Apr 15;20(8):1863. doi: 10.3390/ijms20081863 (PMC6514600; doi:10.3390/ijms20081863)
Supplement: Supplementary file 1 [file ijms-20-01863-s001.zip › Supplementary files/Table S5.xlsx]

## Sheet: Sheet1
Table S5: Expression levels of ROS network genes of G. hirsutum(TM-1) leaves under abiotic stress.
G. hirsutum_A	G. hirsutum_D	Gene name	At	Dt	At cold				Dt cold				At hot				Dt hot				At PEG				Dt PEG				At salt				Dt salt
			Control group	Control group	1 hour after Cold treated	3 hours after Cold treated	6 hours after Cold treated	12 hours after Cold treated	1 hour after Cold treated	3 hours after Cold treated	6 hours after Cold treated	12 hours after Cold treated	1 hour after Hot treated	3 hours after Hot treated	6 hours after Hot treated	12 hours after Hot treated	1 hour after Hot treated	3 hours after Hot treated	6 hours after Hot treated	12 hours after Hot treated	1 hour after PEG treated	3 hours after PEG treated	6 hours after PEG treated	12 hours after PEG treated	1 hour after PEG treated	3 hours after PEG treated	6 hours after PEG treated	12 hours after PEG treated	1 hour after Salt treated	3 hours after Salt treated	6 hours after Salt treated	12 hours after Salt treated	1 hour after Salt treated	3 hours after Salt treated	6 hours after Salt treated	12 hours after Salt treated
Gh_A11G2096	Gh_D11G2412	CSD1	21.36	17.2	27.37	54.32	34.42	19.84	18.85	30.15	48.07	15.03	15.55	21.65	18.37	13	15.53	21.14	16.96	19.63	15.61	13.03	30.16	4.34	21.9	8.2	31.87	10.85	28	32.69	21.47	5.7	31.57	36.9	18.49	15.08
Gh_A13G1450	Gh_D13G1747	CSD2	181.03	151.23	254.94	311.72	290.8	183.86	200.63	282.83	229.04	164.29	530.03	588.81	323.72	251.9	539.21	478.16	288.78	249.22	395.46	270.08	139.14	167.77	252.95	186.97	134.86	151.54	301.04	243.63	178.48	203.26	250.13	259.79	137.39	156.73
Gh_A09G2473	Gh_D09G0858	CSD3	117.21	377.9	166.88	124.74	155.12	142.99	551.33	427.62	645.07	373.12	129.34	152.59	115.03	101.75	434.31	577.41	451.56	423.35	162.65	125.88	115.19	70.33	416	341.93	366.68	228.06	152.75	178.26	78.49	64.28	512.85	590.67	314.08	255.34
Gh_A05G0722	Gh_D05G0857	CSD5	31.36	0.54	31.28	28.34	69.11	30.34	0.39	0	0	0.74	18.83	19.56	21.67	22.03	0	0	0	0.48	38.81	19.24	33.63	8.9	2.1	0.43	0	0.27	31.68	53.78	13.35	11.1	0.64	0.76	0	0
Gh_A13G0817	Gh_D13G1062	CSD6	103.3	186.47	92.37	118.94	83.33	94.42	159.63	252.34	186.58	140.72	78.12	100.52	176.2	91.91	176.6	253.67	359.64	247.99	111.51	148.18	133.86	103.61	164.09	249.18	269.63	266.44	96.31	125.51	132.99	102.62	169.73	284.49	291.76	229.68
Gh_A07G0392	Gh_D07G0457	FSD1	4.67	45.94	0.86	1.47	4.82	2.89	20.31	18.63	33.31	33.7	0	3.9	5.26	5.69	30.17	21.41	44.64	88.22	2.68	1.36	4.63	6.38	35.94	23.01	41.66	117.49	0.52	1.85	2.22	5.02	27.92	31.29	38.21	57.37
Gh_A13G0530	Gh_D13G0600	FSD2	13.27	5.91	10.02	13.08	21.84	16.02	2.79	5.45	11.87	7.58	8.02	15.86	15.18	13.91	5.15	9.44	4.08	8.77	12.92	10.74	13.85	8.38	5.03	5.76	7.35	3.15	11.28	15.81	18.04	12.46	5.41	9.31	9.14	8.17
Gh_A05G2383	Gh_D05G2648	MSD1	61.03	108.9	46.35	72.11	52.91	61.3	120.2	147.88	110.3	98.47	51.36	75.94	88.19	84.64	109.4	135.73	140.9	107.81	66.07	70.54	47.17	107.96	159.13	119.79	73.62	98.54	50.43	60.32	49.32	59.64	127.62	133.27	69.75	68.77
Gh_A10G1595	Gh_D10G1852	MSD2	58.56	17.47	56.17	52.82	32.93	39.97	20	22.21	18.52	15.05	57.66	58.54	51.2	50.04	15.22	18.85	17.24	14.96	61.27	67.02	49.97	70.29	21.17	23.71	17.92	26.09	53.96	61.77	50.39	55.57	23.78	20.91	16.03	22.2
Gh_A01G1388	Gh_D01G1632	APX1	8.61	49.09	22.35	22.67	8.13	13.49	98.35	115.96	79.39	68.75	9.91	6.39	2.72	4.92	68.41	54.33	26.41	21.76	12.63	12.51	9.44	5.35	75.4	47.65	38.3	9	23.45	19.38	8.8	4.39	113.37	67.91	24.32	7.2
Gh_A02G1648	Gh_D03G0074	APX2	11.13	3.5	11.03	13.44	9.87	10.13	6.22	5.74	2.87	7.97	5.74	5.42	7.71	4.21	6.45	1.4	3.01	2.45	5.94	4.11	3.02	2.54	4.72	1.9	1.33	1.54	9.92	7.76	4.58	3.23	3.36	4.48	3.75	2.37
Gh_A03G1812	Gh_D02G2245	APX3	101.9	77.4	179.54	207.01	144.44	124.37	113.02	149.46	104.92	75.25	106.23	140.61	95.1	73.44	68.75	113.82	71.53	76.62	139.96	130.58	120.9	62.44	85.32	88.56	107.14	52.68	148.96	143.56	96.47	53.92	99.54	125.12	96.23	39.94
Gh_A05G0863	Gh_D05G3875	APX5	339.74	169.71	471.94	487.8	374.93	375.6	275.14	304.9	231.22	177.51	1034.26	558.55	353.27	345.47	615.69	353.18	273.07	255.19	641.64	377.05	149.4	301.18	307.75	164.38	95.57	181.25	413.47	294.9	156.35	166.68	232.3	196.21	112.38	152.12
Gh_A05G3726	Gh_D05G2244	APX6	31.74	21.15	34.29	37.05	40.41	25.2	25.44	27.48	23.42	21.99	41.43	46.82	48.27	53.95	17.77	28.02	31.79	38.12	30.21	30.05	29.44	47.61	18.47	20.24	22.51	30.76	32.24	39.74	37.89	46.33	21.97	23.29	22.88	36.94
Gh_A06G0383	Gh_D06G0413	APX7	75.05	46.56	105.44	68.32	86.92	74.3	61.66	49.01	55.21	42.76	57.07	87.32	57.63	47.61	48.81	67.53	52.66	29.09	79.59	80.25	57.02	31.04	49.53	48.09	45.89	17.21	91.29	92.53	51.54	26.56	69.83	58.15	35.31	13.33
Gh_A06G2046	Gh_D06G1049	APX8	111.55	12.08	169.15	153.26	141.28	145.8	12.78	15.43	8.77	9.5	103.81	138.89	92.79	89.15	6.93	7.72	5.92	4.12	135.39	123.1	119.26	64.19	15.81	12.46	13.71	7.35	133.18	136.87	101.11	55.05	11.42	10.19	8.3	2.5
Gh_A08G1744	Gh_D08G2093	APX9	89.01	238.12	82.24	78.67	92.92	95.47	151.03	154.04	166.26	156.67	179.81	94.54	67.1	36.28	318.84	279.48	264.51	111.66	103.01	77.84	59.29	52.48	185.46	271.86	205.1	226.94	105.19	75.86	69.63	27.64	220.97	232.75	318.17	125.98
Gh_A08G1745	Gh_D08G2094	APX10	2.31	5.21	2.9	1.51	1	4.5	1.26	4.69	9.39	7.81	2.71	3.16	1.23	1.24	2.63	3.65	2.74	3.85	1.73	2.83	1.39	2.16	6	5.84	3.68	8.54	0.84	1.45	2.4	6.15	3.58	5	3.23	2.91
Gh_A08G1746	Gh_D08G2095	APX11	192.78	41.39	226.3	200.12	154.34	163.87	58.63	46.53	56.24	29.43	307.69	242.37	205.77	84.84	64	59.81	51.7	36.18	238.3	222.38	160.6	128.63	46.48	45.85	52.04	40.59	223.4	225.47	196.34	77.99	58.07	60.79	48.46	39.26
Gh_A01G1777	Gh_D01G2019	MDAR1	217.23	139.99	375.41	472.16	316.88	333.23	158.53	217.9	192.65	149.92	262.48	241.42	114.08	90.26	140.41	153.1	91.52	102.35	335.52	299.69	215.42	105.51	172.95	164.25	141.41	83.97	333.9	306.99	232.22	93.84	174.39	193.56	151.61	90.47
Gh_A09G1288	Gh_D09G1329	MDAR2	46.69	60.71	55.69	61.38	43.54	47.57	107.22	105.9	70.45	75.7	86.91	100.88	66.86	83.08	122.47	85.44	59.62	65.07	48.55	70.52	44.4	48.91	79.7	89.56	55.75	47.25	73.28	72.56	63.66	56.58	109.65	90.34	77.12	55.99
Gh_A10G0928	Gh_D10G0844	MDAR3	35.6	41.98	74.96	75.57	54.5	72.77	82.97	87.98	68.27	64.96	45.59	35.63	19.71	26.29	44.23	39.13	13.09	22.84	56.64	56.49	29.75	30.9	70.92	61.01	32.42	27.96	64.14	53.59	35.25	32.18	77.08	51.58	28.67	17
Gh_A12G2674	Gh_D12G2745	MDAR4	8.79	10.44	6.31	10.51	10.72	6.48	14.87	18.28	12.5	10.59	4.52	9.89	7.3	11.13	7.75	10.02	9.79	17.57	7.98	7.16	6.42	14.37	10.56	10.04	9.27	18.55	7.88	9.25	6.64	12.9	16.39	9.83	10.41	12.67
	Gh_D09G0264	MDAR6	NA	37.18	NA	NA	NA	NA	28.34	33.82	40.38	65.9	NA	NA	NA	NA	24.3	26.05	20.53	17.27	NA	NA	NA	NA	39.22	56.23	43.93	33.28	NA	NA	NA	NA	46	42.54	31.02	22.75
Gh_A01G2148	Gh_D01G2119	DHAR1	18.89	17.21	19.22	31.04	24.81	20.61	9.95	27.26	14.15	32.32	13.64	15.79	10.32	25.93	16.53	35.24	15.4	62.91	12.12	7.83	15.55	18.97	22.49	14.85	8.33	51.97	12.79	17	11.02	7.96	20.74	13.66	11.22	32.29
Gh_A05G3064	Gh_D04G0580	DHAR2	273.28	106.68	328.06	490.74	326.3	331.54	99.49	167.76	156.81	129.71	211.74	304.93	195.91	39.66	84.89	114.15	80.44	42.44	494.81	434.78	145.48	79.53	151.16	124.25	73.83	37.64	334.14	325.24	152.91	27.94	77.38	116.65	64.51	31.3
Gh_A07G0716	Gh_D07G0778	DHAR3	82.72	98.02	70.95	100.28	72.21	79.72	90.48	109.39	96.78	80.53	94.98	89.24	70.49	62.49	71.17	93.03	55.2	51.68	114.12	106.23	55.11	56.64	108.96	97.29	72.16	62.11	91.41	96.82	64.52	33.54	78.95	97.14	67.4	27.47
Gh_A09G1501	Gh_D09G1511	DHAR4	15.19	71.32	8.44	10.72	7.1	9.87	30.93	53.71	36.99	50.47	7.39	16.39	18.25	15.88	36.19	80.43	122.94	135.69	10.34	11.32	15.02	17.68	41.28	74.09	76.78	167.67	8.82	14.44	17.31	11.6	39.74	56.89	81.86	57.89
Gh_A10G1891	Gh_D10G2161	DHAR5	43.29	26.1	41.07	64.2	26.88	57.92	27.58	35.3	14.06	34.36	91.68	95.52	66.28	82.96	18.27	37.76	30.82	25.43	55.2	60.37	50.53	31.25	34.67	39.51	28.23	20.6	50.05	55.42	56.88	27.22	25.19	29.63	30.8	17.45
Gh_A03G0807	Gh_D02G1229	GR1	14.92	37.53	14.24	14.91	9.62	12.68	53.02	45.99	33.66	52.06	11.47	16.12	14.91	15.88	46.03	40.46	36.67	42.43	17.44	18.73	12.52	17.74	55.61	53.05	34.85	33.14	15.18	16.4	17.54	18.33	64.45	46.78	40.47	31.41
Gh_A10G1090	Gh_D10G1419	GR2	20.13	21.63	20.31	22.63	11.62	16.85	14.03	12.95	9.24	8.89	14.95	20.25	18.21	27.78	9.75	10.06	15.97	16.6	15.53	26.25	20.53	53.99	11.21	18.6	19.8	70.49	24.25	22.4	34.56	32.23	12.04	15.23	34.42	40.73
Gh_A11G1167	Gh_D11G1323	GR3	46.12	37.34	106.01	90.96	80.31	64.05	75.37	63.7	69.03	44.84	48.36	39.06	23.58	24.76	31.88	36.45	27.92	30.65	57.95	65.41	45.75	17.1	49.5	54.56	41.11	19.58	87.49	75.54	48.08	20.75	72.06	62.3	47.57	16.83
Gh_A01G0845	Gh_D01G0873	CAT1	91.43	167.56	187.04	151.33	111.08	92.16	232.1	198.76	130.87	136.53	104.6	108.1	104.63	64.08	200.48	248.13	234.03	139.6	128.03	223.38	116.15	57.32	186.64	390.34	229.64	102.71	174.84	165.72	127.01	49.11	250.6	270.26	251.16	80.21
Gh_A05G1539	Gh_D05G1710	CAT3	1.43	19.54	0.78	0.94	0	1.8	25.12	18.26	15.37	10.91	0	2.04	2.69	1.18	17.8	36.35	36	26.3	0.44	3.46	2.81	1.09	14.35	37.37	32.49	23.15	1.46	2.1	4.93	2.53	25.57	38.98	48.19	17.99
Gh_A07G1556	Gh_D07G1724	CAT4	3.97	9.56	12.5	5.41	4.46	5.31	21.26	14.54	14.71	14.43	1.24	2.06	1.32	2.31	16.07	5.52	4.13	7.61	10.59	6.28	6.66	2.6	18.67	14.02	9.1	5.19	6.92	3.32	0	1.58	15.4	9.37	3.95	1.55
Gh_A07G0269	Gh_D07G0326	GPX1	59.66	78.9	153.32	223.08	98.78	67.4	254.01	297.96	152.97	116.16	51.85	52.85	14.95	26.42	95.94	85.27	12.07	21.97	97.89	60.43	44.09	26.63	125.71	55.18	46.85	13.37	84.85	61	24.88	17.88	133.35	101.08	31.65	12.15
Gh_A08G0633	Gh_D08G0734	GPX2	24.06	5.2	12.68	25.21	13.19	26.99	4.82	4.26	2.11	6.02	11.92	30.62	24.95	34.36	0	4.99	7.35	8.85	25.12	25.67	31.54	27.74	2.72	0	10.34	5.57	11.33	21.87	30.46	33.42	4.3	5.32	8.87	20.39
Gh_A08G0673	Gh_D08G0775	GPX3	3.81	4.78	0.95	0.51	2.35	1.3	4.1	5.06	1.16	4.5	3.13	3.63	2.01	1.49	2.03	4.78	1.48	5.52	2.12	2.65	0.67	1.68	5.72	7.59	4.29	4.93	4.25	2.45	0.42	3.91	6.06	3.94	2.08	2.42
Gh_A08G1661	Gh_D08G1994	GPX4	11.89	12	19.28	58.01	30.93	8.05	21.96	42.39	13.34	9.91	3.37	13.69	13.52	23.64	6.69	8.99	5	20.13	9.56	12.86	11.71	19.11	11.48	4.84	9.49	17.15	14.98	9.29	8.32	15.15	11.69	13.05	1.36	19.22
Gh_A08G2385	Gh_D08G1956	GPX5	40.33	122.04	49.73	102.21	57.8	72.51	121.01	181.66	122.7	154.85	113.99	120.21	52.35	43.35	384.21	193.21	132.32	124.17	62.14	64	41.68	51.84	169.04	134.3	87.5	175.63	52.05	55.71	43.96	57.57	116.67	97.87	88.97	138.45
Gh_A09G2408	Gh_D09G1595	GPX6	10.9	1.75	15.74	21.82	17.53	11.1	2.27	0.93	0	0	7.8	19.73	12.1	23.98	0	0.77	0	2.24	10.22	5.91	15.96	7.67	0.51	0.62	1.2	0.39	10.64	14.04	8.72	5.18	2.71	1.74	0.79	0.48
Gh_A12G2084	Gh_D12G2260	GPX7	13.82	54.34	8	15.74	9.08	5.09	60.3	104.42	35.71	37.91	5.7	11.33	14.75	11.78	34.59	53.2	45.91	16.59	15.16	25.85	19.76	17.6	70.85	141.36	108.48	36.79	8.77	20.37	28.75	20.59	87.71	119.42	163.08	56.51
Gh_A12G2086	Gh_D12G2262	GPX8	12.31	17.42	8.62	9.07	10.08	6.94	8	31.27	8.68	13.66	10.56	16.3	12.91	21.21	12.34	34.8	21.44	44.85	12.2	14.35	20.07	20.53	23.88	28.71	21.38	27.55	10.61	11.57	5.91	20.59	20.8	27.14	24.27	32.03
Gh_A05G2629	Gh_D05G2919	FER2	0.67	1.74	0.79	0	0	1.52	3.12	0.68	0	2.3	0	1.06	1.35	2.01	0.73	2.22	3.13	8.98	1.14	2.74	0.42	0.66	1.46	1.77	1.87	9.96	1.88	0.4	1.66	0.65	1.36	2.63	5.35	5.42
Gh_A09G2418	Gh_D09G1582	FER3	33.93	27.39	34.85	45.76	50.14	57.19	20.85	24.08	29.11	17.93	92.99	70.02	34.7	24.95	19.86	32.27	37.65	53.15	27.49	10	13.41	39.95	11.82	2.36	4.73	102.89	23.03	9.52	11.14	25.12	6.61	4.07	9.16	49.43
Gh_A10G2147	Gh_D10G2394	FER4	27.03	99.72	21.39	23.27	21.91	18.89	83.89	95.87	94.56	69.03	18.77	32.52	23.92	23.27	69.98	104.24	60.75	60.1	24.29	18.72	21.58	25.47	108.47	82.7	98.79	50.21	28.51	21.53	27.75	23.65	94.2	87.83	72.56	37.78
	Gh_D04G0674	FER6	NA	21.69	NA	NA	NA	NA	9.03	10.73	27.14	8.05	NA	NA	NA	NA	10.22	18.86	36.4	43.51	NA	NA	NA	NA	15.42	16.1	19.15	35.68	NA	NA	NA	NA	7.88	14.06	14.6	32.18
Gh_A12G2669	Gh_D12G2750	RBOH3	3.61	6.31	4.27	3.79	4.5	6.89	9.84	9.9	12.04	18.66	2.58	4.34	4.47	3.21	10.28	9.27	7.86	3.34	1.68	4.17	3.24	8.33	4.95	11.11	6.59	10.84	3.4	2.12	9.55	7.82	8.83	4.63	18.08	13.55
Gh_A03G0476	Gh_D03G1062	RBOH6	0.08	9.34	0.09	0.65	0.3	0.09	13.63	10.32	3.77	5.81	0	0.16	0.07	0.18	9.61	14.26	14.3	9.91	0.2	0.23	0	0.06	6.86	15.71	9.57	10.59	0.13	0.19	0.06	0.29	10.37	9.79	15.12	13.36
Gh_A12G1774	Gh_D12G1932	RBOH8	1.96	2.9	2.32	1.75	0.72	0.87	4.69	4.16	2.02	1.13	2.18	1.28	3.15	1.64	2.98	2.04	2.49	2.78	1.8	3.11	2.65	2.43	2.1	4.86	2.64	1.75	2.51	2.14	3.13	2.34	2.82	3.08	2.96	1.8
Gh_A05G2211	Gh_D05G2471	RBOH11	2.97	2.27	2.52	4.01	6.11	12.67	2.2	3.29	4.81	10.4	2.28	4.81	5.03	1.88	2.72	4.8	5.86	2.44	1.55	2.82	1.86	5.68	1.1	2.5	1.43	5.04	2.66	2.42	5.31	7.62	2.53	1.36	5.05	6.86
Gh_A05G2158	Gh_D05G2413	FRO2	4.88	4.22	5.48	6.41	0.76	2.65	7.16	7.21	3.02	2.47	1.18	3.71	3.97	3.86	1.41	6.13	3.62	1.22	4.27	5.55	6	7.65	4.18	5.84	4.98	2.46	4.07	5.27	11.1	9.26	6.77	4.98	6.72	2.52
Gh_A10G1862	Gh_D10G2127	FRO5	63.67	87.05	302.83	212.72	98.5	177.91	413.41	327.9	161.43	187.64	168.37	34.74	1.76	3.23	190.34	72.87	4.82	8.07	247.66	150.07	21.51	2.53	265.97	195.61	48.9	4.09	284.35	171.16	12.9	4.29	302.07	211.02	31.83	6.34
Gh_A11G0450	Gh_D11G0521	FRO6	56.88	46.5	43.9	84.45	57.16	49.39	46.56	61.22	63.82	46.73	38.3	54.43	43.45	37.57	62.36	58.64	42.42	38.78	65.26	48.04	40.75	54.39	45.12	36.87	41.82	46.19	62.73	68.16	48.91	46.51	55.71	68.87	42.37	41.67
Gh_A03G1527		AOX2	72.07	NA	64.64	96.64	64.08	269.33	NA	NA	NA	NA	55.95	87.82	98.86	50.11	NA	NA	NA	NA	106.43	155.61	87.73	39.79	NA	NA	NA	NA	104.78	116.73	98.45	37.19	NA	NA	NA	NA
Gh_A04G0970	Gh_D04G1513	AOX3	12.61	8.4	0	1.57	1.3	6.87	0.12	0.97	0.88	5.9	1.32	13.12	29.46	19.52	0	9.78	24	16.59	1.03	4.69	5.51	63.83	0.22	2.05	5.34	53.87	0.53	1.16	20	35.16	0.18	1.08	14.05	30.87
Gh_A05G1491	Gh_D05G1662	AOX4	13.5	19.36	20.17	17.28	15.09	13.87	21.43	20.3	15.03	13.77	9.3	20.9	15.4	17.54	14.48	23.77	16.36	16.55	14.13	16.86	14.96	18.47	21.83	17.17	19.46	15.17	12.42	18.29	18.12	17.75	16.95	16.96	24.77	18.69
Gh_A04G0493	Gh_D04G0917	PrxR1	871.44	964.04	939.03	976.05	1193.29	876.88	1046.29	1207.91	1310.01	942.6	721.98	789.28	623.19	497.56	809.01	872.93	580.92	552.65	999.74	808.26	797.55	563.66	1162.21	995.58	797.34	644.73	903.43	972.08	533.69	288.11	1210.31	1076.05	534.12	323.17
Gh_A10G1567	Gh_D10G1825	PrxR5	2.57	0.5	0.52	0	0.98	2.92	1.49	0.73	0	6.52	0.88	0.69	8.24	17.12	0	0	0	1.15	0.94	2.22	0.54	38.12	0.45	0.26	0.26	6.67	6.06	2.84	8.91	66.39	0.78	1.16	0.64	13.03
	Gh_D05G0244	PrxR6	NA	8.99	NA	NA	NA	NA	8.86	4.09	0	5.52	NA	NA	NA	NA	7.41	7.93	19.16	20.33	NA	NA	NA	NA	5.23	12.4	7.38	39.2	NA	NA	NA	NA	15.02	7.25	14.96	26
Gh_A08G2151	Gh_D08G2518	PrxR8	384.84	169.38	209.63	269.32	184.43	208.43	113.58	146.01	132.51	118.37	266.46	424.93	599.57	340.22	124.48	209.9	199.89	171.28	228.72	396.44	430.47	370.68	97.06	151.1	217.35	139.71	243.28	488.68	442.88	238.06	103.68	253.7	206.77	147.13
Gh_A01G1793	Gh_D01G2034	PrxR10	122.55	84.47	188.51	158.96	150.93	66.98	145.04	122.82	129.25	68.36	121.03	115.43	88.2	128.57	102.79	59.8	45.09	76.89	190.43	112.91	84.05	116.79	145.98	85.04	51.83	80.66	216.52	195.19	79.79	65.2	143.9	96.62	37.88	42.87
Gh_A10G1104	Gh_D10G1403	PrxR11	53.75	31.74	51.59	64.67	76.36	60.72	34.39	46.68	37.24	29.74	53.36	86.1	71.97	66	30.73	44.57	25.38	35.55	61.44	54.12	57.6	54.68	54.8	47.39	36.19	43.84	56.62	74.52	54.4	40.55	33.7	34.31	29.81	27.44
Gh_A08G2202	Gh_D08G2567	PrxR12	187.5	201.7	427.1	520.85	474.4	146.68	330.04	446.52	328.95	142.18	117.13	173.51	67.28	114.56	112.08	111.63	54.47	87.03	184.72	117.95	176.2	52.57	182.77	138.52	226.54	81.03	251.98	251.66	122.39	50.74	209.26	294.59	144.12	92.81
Gh_A01G0392	Gh_D01G2342	Trx1	5.64	6.48	4.04	3.02	4.49	3.88	4.27	2.23	6.63	3.66	7.16	4.46	3.92	5.12	7.28	4.25	5	6.69	4.04	3.12	3.35	3.86	4.28	3.19	5.07	3.69	5.4	4.17	2.23	5.92	4.61	5.68	2.66	6.11
Gh_A09G0941	Gh_D09G0972	Trx2	30.69	43.11	31.02	44.32	14.81	24.42	45.84	50.89	26.32	19.11	20.67	35.23	23.84	34.56	59.03	48.92	41.17	66.35	37.2	32.31	27.64	32.99	47.54	47.48	40.99	50.09	32.17	61.69	32.23	34.77	45.14	43.96	33.33	35.52
Gh_A04G0602	Gh_D04G1063	Trx3	13.38	30.24	0.72	3.53	5.86	6.65	15.7	23.03	17.35	19.75	2.63	18.86	11.6	14.31	20.79	27.5	16.49	27.37	11.67	13.46	12.75	23.17	22.82	40.85	49.76	35.18	3.49	7.98	11.94	19.38	23.1	45.57	43.45	23.29
Gh_A01G0370	Gh_D01G2331	Trx6	7.47	6.03	2.91	10.15	7.08	6.7	2.37	10.04	2.36	5.7	4.33	11.1	13.12	14.59	6.78	11.08	4.07	6.59	13.78	10.83	11.78	12.88	5.85	6.58	1.77	8.71	9.3	16.25	6.21	11.3	6.41	10.99	11.38	9.35
Gh_A04G0936	Gh_D04G1453	Trx7	42.74	75.83	28.68	96.62	59.42	37.74	56.32	189.78	102.84	93.25	56.97	50.38	46.8	41.86	82.29	53.77	68.75	51.19	46.66	39.17	47.08	36.47	106.59	67.97	69.06	45.78	53.96	92.94	53.94	54.35	112.16	130.75	74.25	62.52
Gh_A03G1039		Trx11	82.28	NA	191.74	221.6	89.46	81.33	NA	NA	NA	NA	26.91	70.13	49.54	99.98	NA	NA	NA	NA	89.88	75.4	92.78	107.4	NA	NA	NA	NA	130.82	107.13	94.21	104.58	NA	NA	NA	NA
Gh_A10G1673	Gh_D10G1930	Trx12	19.02	28.88	2.56	5.71	8.07	7.97	3.08	8.97	20.22	10.9	8.76	22.87	31.99	25.48	1.73	43.59	44.44	41.87	10.2	10.46	28.9	16.68	14.17	11.61	28.79	14.71	0	10.04	14.27	19.36	6.37	9.49	17.12	11.85
Gh_A13G0947	Gh_D13G1199	Trx13	747.97	495.04	1059.47	1449.15	848.48	837.99	570.77	732.44	414.27	522.93	1004.52	999.85	297.4	21.11	542.2	775.59	408.18	43.26	1257.66	1445.16	689.35	8.9	789.57	1023.83	786.33	21.29	1284.88	1565.18	451.17	15.63	831.55	1125.8	604.73	28.14
Gh_A03G1663	Gh_D02G2078	Trx14	5.5	5.81	5	9.77	4.53	7.5	5.49	13.04	6.66	4.14	8.43	10.32	5.6	16.21	6.06	6.4	3.54	8.17	7.5	7.87	4.43	17.3	4.38	4.75	3.74	5.17	6.23	6.41	6.08	10.99	2.54	4.62	7.21	4.02
Gh_A12G0210	Gh_D12G0212	Trx15	6.7	20.37	0.57	6.62	7.12	1.01	7.46	5.72	4.8	3.01	0	5.37	17.47	9.99	5.98	46.9	70.18	65.99	1.9	3.24	4.01	12.78	3.82	18.51	30.54	50.71	3.68	7.28	19.66	13.32	6.47	23.28	42.23	36.27
Gh_A04G0896	Gh_D04G1401	Trx16	9.69	27.77	17.19	12.31	16.17	6.76	35.37	40.42	20.84	13.63	11.54	14.26	7.35	6.83	22.48	25.8	20.04	19.96	11.39	8.79	9.84	9.18	45.9	27.1	23.04	22.68	13.53	17.59	8.88	10.3	33.57	35.69	24.75	23.07
Gh_A04G0254	Gh_D05G3451	Trx17	34.64	55.97	33.15	59.38	39.56	54.46	35.98	112.64	83.7	96.24	91.31	110.46	78.82	41.91	132.06	169.79	103.42	62.91	48.4	50.7	39.31	15.53	81.53	72.51	59.01	30.96	66.08	67.09	34.34	33.86	78.51	111.03	64.63	61.44
Gh_A13G1237	Gh_D13G1537	Trx18	41.82	0.45	38.67	37.38	24.79	55.52	0	1.54	0	0	31.6	85.56	66.8	73.61	0	1.41	0	1.28	39.52	69.41	80.72	51.88	1.59	1.4	1.04	1.03	42.23	95.26	76.21	96.34	2.45	2.48	0.67	14.19
Gh_A02G0699	Gh_D02G0744	Trx21	299.67	426.55	645.83	1195.17	608.63	303.62	774.84	1334.96	804.75	383.39	268.62	530.09	172.95	231.94	393.46	776.5	243.83	237.63	327.89	267.57	723.75	133.26	539.47	417.7	870.79	158.97	586.12	879.24	470.01	208.5	752.91	1079.78	605.01	212.82
Gh_A05G1744	Gh_D05G1938	Trx22	0	3.81	0	0	0	0	6.95	9.33	6.7	7.93	0	0	0	0	3.9	8.34	2.89	4.18	0	0.53	0	0	6.95	2.86	5.7	1.44	0	0	0.56	0	6.87	8.8	4.32	4.02
Gh_A03G1112	Gh_D02G1538	Trx23	20.84	31.16	22.09	31.37	28.8	20.8	26.93	35.49	31.6	15.21	20.76	16.98	23.76	21.07	23.68	33.55	36.47	40.21	30.39	18.24	16.61	25.84	34.97	32.89	27.8	37.08	22.93	23.01	12.23	15.97	29.64	26.8	26.37	26.78
Gh_A05G2534	Gh_D05G2811	Trx24	5.45	4.83	0	4.07	0	4.08	0.89	3.27	1.12	1.83	2.09	4.49	6.01	5.08	1.07	4.22	8.82	4.16	2.55	3.03	6.9	5.78	2.02	6.44	3.87	6.02	2.28	2.26	3.9	2.92	1.87	3.49	4.44	3.02
Gh_A04G1345	Gh_D04G0855	Trx25	20.19	52.06	7.42	12.3	13.93	14.96	14.48	25.87	30.85	39.16	3.75	16.42	11.49	19.93	5.79	19.64	67.89	93.86	12.43	14.98	29.97	21.13	17.67	16.84	100.97	98.52	11.78	14.94	15.77	11.64	8.76	30.91	73.84	83.07
Gh_A11G0026	Gh_D11G0024	Trx26	10.46	11.77	11.26	14.18	8.41	19.43	13.36	15.39	15.08	13.22	15.1	19.43	10.84	15.91	9.7	12.29	10.32	10.83	14.36	17.82	18.74	13.36	14.32	14.56	15.29	13.61	13.75	13.82	15.54	9.37	13.64	15.13	12.33	10.55
Gh_A03G0712	Gh_D02G0962	Trx29	56.35	66.97	45.66	90.03	52.66	78.73	46.63	113.5	42.35	67.41	50.06	38.04	43.78	41.48	60.11	82.46	78.5	60.45	69.81	63.02	67.16	41.88	58.39	94.27	102.49	73.28	83.27	91.48	48.71	43.49	81.25	151.88	115.73	67.13
Gh_A01G0925	Gh_D01G0969	Trx31	487.26	1058.84	456.54	1276.57	489.77	604.07	633.08	1359.43	795.07	980.89	415.75	423.11	380.79	373.05	648	784.53	731.27	617.16	557.2	688.28	402.12	551.62	1194.59	1333.07	720.33	1603.12	421.51	687.94	621.08	735.83	837.52	988.33	720.05	845.59
Gh_A10G0871	Gh_D10G0883	Trx32	125.05	0.44	72.9	198.03	139.75	69.83	0	0	0	0	69.91	145.13	134.36	100.62	0	0	0	0	123.34	134.02	125.94	129.89	0	0.8	0	0	85.17	193.35	99.7	110.24	0	0	0	2.12
Gh_A05G1428	Gh_D05G1600	Trx34	62.9	79.66	22.39	60.57	19.84	40.73	31.3	71.47	52.35	61.38	34.15	123.69	88.87	54.88	66.35	156.19	90.25	28.44	32.39	94.42	128.03	46.69	71.93	117.39	143.16	29.8	60.55	116.7	105.74	38.57	66.35	164.27	79.93	23.62
Gh_A01G0565	Gh_D01G0574	Trx35	5.83	1.32	0	10.94	3.3	4.51	0	0	0	0	8.27	40.25	18.95	29.9	0	0	15.6	12.56	10.81	4.75	10.88	4.24	0	0	0	0	10.29	9.18	2.29	14.14	0	0	0	0
Gh_A09G2271	Gh_D09G2058	Trx37	19.54	1.85	3.82	23.38	7.71	19.25	1.17	0	4.8	3.33	7.06	20.14	16.88	12.8	2.11	0.81	2.1	2.25	19.59	12.19	14.84	34.17	0	3.41	1.9	3.06	15.58	18.96	17.16	27.21	0	0.61	0	2.86
Gh_A10G1358	Gh_D10G1112	Trx38	17.99	34.4	14.95	24.39	13.03	28.45	21.81	40.47	22.89	26.23	18.21	23.46	23.48	15.6	25.94	42.92	32.24	30.4	18.26	12.64	20.7	17.71	35.78	37.76	24.3	43.84	12.95	22.24	19.07	18.11	23.21	35.54	20.18	33.74
Gh_A05G2809	Gh_D05G3114	Trx39	141.58	102.07	165.11	446.09	149.54	137.74	170.62	629.84	231.57	135.54	86.01	161.16	120.77	151.35	58.15	152	70.73	78.24	168.31	146.65	148.19	59.11	148.15	106.73	135.94	46.23	136.26	179.05	160.22	86.7	170.9	193.17	172.16	126.02
Gh_A09G0209	Gh_D09G0198	Trx40	23.02	65.73	22.86	44.18	15.9	14.2	63.45	138.24	59.11	39.45	19.79	30.8	33.18	30.5	36.16	92.61	61.84	82.51	34.2	53.13	22.64	28.16	74.53	82.22	68.25	65.77	17.36	37.95	34.16	32.64	90.52	132.53	82.56	81.44
Gh_A05G3165	Gh_D04G0461	Trx41	9.53	52.46	6.23	12.9	0	16.07	54.46	84.25	54.66	41.53	9.38	13.77	14.28	11.02	36.57	77.31	63	72.43	15.11	14.78	6.72	13.08	45.44	46.97	41.98	112.49	12.04	12.05	19.1	6.63	40.19	42.6	46.02	78.37
Gh_A04G0941	Gh_D04G1456	Trx42	154.48	106.84	170.07	290.91	214.3	217.06	142.74	180.9	110.04	169.93	138.31	101.47	62.29	72.07	134.52	81.38	52.51	37.08	248.95	157.16	117.15	115.1	183.69	123.27	67.25	77.53	237.04	188.73	96.62	78.52	145.54	126.12	54.43	49.11
Gh_A05G3692	Gh_D05G2311	Trx43	56.9	30.6	8.08	10.35	29.41	22.89	17.99	19.65	21.06	23.99	2.05	20	87.57	62.36	12.45	27.69	35.17	27.64	26.49	28.53	118.12	87.73	27.2	21.55	42.87	39.28	15.54	39.77	100.45	85.7	26.9	34.74	48.64	26.7
	Gh_D02G1432	Trx44	NA	128.47	NA	NA	NA	NA	176.73	196.2	120.1	141.69	NA	NA	NA	NA	114.51	113.55	90.46	96.96	NA	NA	NA	NA	184.21	187.76	141.12	127.81	NA	NA	NA	NA	175.58	162.02	132.49	101.94
Gh_A03G1037		Trx44	3.27	NA	1.96	2.55	2.22	1.59	NA	NA	NA	NA	5.24	3.08	6.67	2.72	NA	NA	NA	NA	3.52	2.38	3.13	4.74	NA	NA	NA	NA	3.63	3.14	2.34	2.99	NA	NA	NA	NA
Gh_A08G0527	Gh_D08G0621	Trx46	32.21	30.41	46.86	66.49	41.04	53.44	40.66	50.72	30.65	28.82	17.31	20.38	16.29	27.97	17.12	18.24	8.55	16.9	34.84	29.11	31.82	25.86	32.77	26.92	26.87	17.78	33.28	30.47	19.36	27.7	35.66	29.32	28.05	17.57
Gh_A06G0633	Gh_D06G0720	Trx47	10.01	9.82	7.13	6.77	10.78	5.57	13.5	10.77	8.64	10.54	4.94	8.29	9.17	9.76	10.81	16.99	9.14	10.13	6.55	9.59	7.62	12.52	6.52	11.14	13.14	12.89	9.26	9.04	10.94	9.15	8.32	17.23	19.49	13.08
	Gh_D12G1760	Trx49	NA	3.36	NA	NA	NA	NA	4.37	2.56	9.79	4.45	NA	NA	NA	NA	1.6	2.46	2.65	1.39	NA	NA	NA	NA	2.47	0.98	0.26	0	NA	NA	NA	NA	2.64	0.9	0.32	0
Gh_A13G0827	Gh_D13G1071	Trx50	34.01	20.38	26.38	42.87	59.33	78.8	15.23	24.78	44.28	52.61	18.12	19.11	13.39	32.38	7.27	8.38	13.35	20.58	32.24	36.6	36.59	63.66	16.17	19.47	28.84	57	65.7	44.78	46.15	66.95	28.66	23.06	32.61	59.48
Gh_A11G2160	Gh_D11G2462	Trx52	25.57	16.6	23.57	38.35	31.03	44.54	14.99	19.35	38.82	27.98	24.02	33.63	24.46	22.7	7.98	12.47	11.25	20.88	34.05	38.07	35.13	17.88	14.38	21.8	23.06	13.85	43.88	39.23	44.01	20.55	31.16	26.53	30.35	20.97
Gh_A09G1503	Gh_D09G1514	Trx53	35	10.56	55.26	91.85	50.3	33.04	19.51	24.14	22.91	6.91	40.02	63.97	17.13	6.03	15.22	17.23	8.59	1.11	39.33	32.86	58.53	3.66	10.46	8.71	14.3	3.19	48.16	64.11	42.47	5.75	16.49	20.6	14.67	2.63
Gh_A10G0803	Gh_D10G0960	Trx54	69.24	47.57	127.74	95.25	78.02	78.52	66.81	51.99	40.15	43.59	90.1	81.2	49.6	41.03	59.77	56.74	53.31	35.78	92.49	138.86	95.89	51.17	61.59	100.87	67.94	48.96	110.59	117.78	88.6	37.45	64.62	68.43	64.59	34.05
Gh_A09G0014	Gh_D09G0012	Trx60	4.55	2.9	3.52	4.89	4.37	1.69	3.07	2.42	3.42	1.65	7.77	3.13	4.17	4.11	5.74	3	3.45	3.3	4.65	3.38	3.05	2.84	3.46	1.56	1.83	2.66	3.84	4.11	2.29	3.03	2.52	2.93	1.74	3.07
Gh_A08G2076	Gh_D08G2653	Trx61	3.88	3.72	4.93	3.33	4.8	4.44	2.37	2.96	4.12	3.71	4.74	2.86	3.04	2.99	2.55	3.4	4.11	4.09	3.78	6.1	4.22	1.59	3.33	4.96	6.44	2.16	4.27	4.84	3.62	1.87	3.42	4.78	6.66	2.54
	Gh_D10G1672	GLR3	NA	6.03	NA	NA	NA	NA	1.45	0	0	17.15	NA	NA	NA	NA	0	4.28	0	2.22	NA	NA	NA	NA	3.75	4.53	5.96	1.11	NA	NA	NA	NA	5.09	1.7	2.29	2.68
Gh_A11G0180	Gh_D11G0190	GLR11	260.51	230.08	237.97	404.55	214.13	264.58	233.2	382.2	216.98	169.6	190.04	223.99	121.02	92.26	174.39	226.8	98.48	91.17	368.56	336.43	170.96	152.33	286.65	293.76	147.03	139.3	277.38	277.87	116.97	78.21	230.03	279.05	125.52	111.46
Gh_A09G2433	Gh_D09G1570	GLR12	31.51	39.54	35.41	32.92	35.38	20.47	48.63	37.3	45.08	29.11	29.35	52.82	48.56	46.87	33.23	60.01	56.35	48.77	31.42	31.43	34.18	24.32	39.85	46.52	41.58	32.28	45.4	45.27	31.47	22.6	48.39	65.67	44.58	25.74
Gh_A10G0680	Gh_D10G0706	GLR13	27.46	25.18	17.05	31.37	16.82	18.99	12.69	22.36	23.5	22.53	13.81	22.04	14.89	24.24	15.16	24.85	16.32	18.09	23.47	24.89	24.06	23.31	22.46	23.12	26.12	29.94	10.06	25.77	17.74	17.56	11.44	13.99	20.87	19.46
Gh_A10G0246	Gh_D10G0226	GLR14	8.81	17.82	7.18	8.54	7.69	11.25	21.7	29.78	26.23	21.83	8.37	9.77	10.47	10.11	15.18	15.97	14.82	17.67	6.03	7.88	9.28	9.78	13.07	17.42	20.14	18.58	7.44	7.07	13.44	10.49	16.92	16.5	20.46	18.63
Gh_A05G1984	Gh_D05G3813	GLR15	9.55	8.48	6.35	6.1	3.84	9.69	5.66	4.81	4.68	8.09	13.1	17.11	19.92	13.84	7.39	15.17	15.69	12.33	7.97	11.24	11.87	15.09	6.66	9.41	10	15.15	7.03	10.08	15.79	12.9	6.26	7.63	14.57	12.07
Gh_A12G2492	Gh_D12G2620	GLR20	4.73	9.03	4.57	3.23	2.59	5.29	16.56	17.69	7.92	20.48	6.81	1.77	1.07	3.41	13.08	11.94	20.43	15.8	6.52	3.48	2.79	7.07	15.33	14.84	7.82	11.06	6.48	1.99	4.75	1.65	3.23	13.19	14.44	9.1
Gh_A09G0271	Gh_D09G0272	GLR21	202.87	68.52	292.58	769.64	391.54	277.93	53.94	135.11	69.98	62.06	132.78	241.51	178.08	132.87	43.56	74.15	102.43	117.43	306.89	336.31	211.26	138.7	67.06	76.74	80.38	84.25	259.51	357.08	167.32	131.4	54.32	90.81	70.31	101.91
Gh_A08G0733	Gh_D08G0870	GLR22	79.7	55.22	19.29	55.01	21.47	43.33	33.31	64.89	35.57	29.43	87.42	83.92	131.03	78.79	68.66	65.62	87.4	77.51	76.94	84.05	72.86	83.57	64.81	45.08	43.32	76	63.6	89.13	81.81	71.42	50.93	65.75	33.86	43.37
Gh_A10G0874	Gh_D10G0879	GLR23	27.49	38.23	12.91	32.58	23.9	22.91	33.6	35.07	44.16	30.18	22.27	37.85	17.69	27.61	41.45	47.53	35.42	25.28	23.71	19.64	32.02	28.57	39.21	39.44	45.37	31.07	34.18	30.05	34.69	48.76	24.77	52.41	39.88	40.38
Gh_A07G1852	Gh_D07G2061	GLR24	12.85	8.05	25.12	24.91	16.88	10.95	15.52	18.18	13	10.88	25.84	18.35	10.15	9.45	10.23	8.77	8.61	4.7	13.74	7.44	17.76	3.42	11.33	10.32	3.52	2.06	19.3	21.56	22.85	10.07	5.34	16.33	9.02	11.17
Gh_A11G1243	Gh_D11G1390	GLR25	14.26	25.92	15.56	28.57	11.05	13.6	32.58	40.03	26.96	30.9	15.22	13.73	19.32	14.48	20.24	31.71	13.03	15.1	14.09	14.66	17.49	8.72	38.66	22.69	19.87	10.22	15.71	19.86	8.75	9.37	25.53	30.31	8.45	13.42
Gh_A08G1017	Gh_D08G1291	GLR26	3.82	9.01	0	2.44	0	9.27	4.05	14.45	0	13.48	0	4.22	0	0	0	2.08	7.74	0	4.67	4.31	0	1.31	5.4	12.36	6.94	6.82	0	4.82	8.21	2.49	4.65	7.93	6.05	12.27
Gh_A08G0666	Gh_D08G0767	GLR30	16.37	8	16.79	48.15	6.85	4.85	2.62	23.54	0	2.26	11.42	20.04	22.99	0	0	8.35	2.74	2.14	17	18.24	7.83	5.89	4.38	7.56	7.34	2.52	29.27	8.99	26.53	4.1	2.47	10.02	4.51	0
Gh_A12G0064	Gh_D12G0079	GLR32	57.24	0	59.54	163.05	20.52	37.4	0	0	0	0	28.53	44.64	26.75	23.58	0	0	0	0	26.64	30.65	20.76	24.24	1.29	0	0	0	24.17	77.3	39.46	50.24	0	0	0	11.28
Gh_A05G0320	Gh_D05G0426	GLR37	45.61	95.07	4.8	28.75	8.44	4.85	14.83	58.53	33.61	24.15	11.84	2.17	10.86	35.67	37.96	52.22	135.88	62.9	1.71	4.03	10.56	152.24	39.5	111.25	102.92	166.2	2.48	9.29	31.16	64.56	38.95	70.85	143.61	76.7
Gh_A10G0264	Gh_D10G0264	GLR41	6.79	2.66	0	2.24	1.68	4.71	0	0.53	0	1.13	1.55	12.87	15.96	8.81	0	2.12	10.79	1.85	0.28	8.25	2.52	31.19	0	2.89	2.8	9.02	1.3	1.21	19.51	3.49	0	0	6.14	4.48
Gh_A03G1365	Gh_D02G1805	GLR42	3.72	4.87	3.96	44.55	19.74	15.35	9.71	113.11	96.05	58.19	0	0.83	11.44	12.4	4.41	4.77	11.19	1.49	0	1.08	0.6	54.44	1.71	1.99	3.44	47.39	0	1.19	2.42	12.47	1.82	1.72	7.67	13.33
Gh_A05G1338	Gh_D05G1507	GLR43	16.65	10.52	6.16	31.57	42.18	46.31	2.6	23.11	27.9	17.78	13.2	28.96	66.92	5.3	7.51	8.28	37.75	7.59	13.54	28.44	22.94	22.82	5.78	10.69	13.34	26.95	15.01	15.71	41.67	10.07	7.73	6.22	26.07	12.18
Gh_A05G1452	Gh_D05G1626	PER3	2027.51	2032.31	1422.13	1341.61	915.98	1387.25	1379.07	1600.91	1117.1	1534.1	1912.47	1993.72	2316.16	2084.27	1721.06	1631.23	1997.07	1899.13	2318.71	3334.38	2078.18	2130.98	2271.9	2077.21	2262.77	2245.73	2706.08	3284.04	2438.78	2121.73	2522.05	3030.04	2257.83	1927.45
Gh_A02G1466	Gh_D03G0246	PER20	1.27	2.48	0.17	2.16	0	0.7	0	1.69	0.62	0	1.16	1.28	3.68	7.24	1.72	2.35	5.73	16.52	0.85	0.59	0.17	13.82	1	2.72	0.52	35.83	0.75	0.3	0.41	4.69	0	0.74	0.62	7.4
Gh_A01G1487	Gh_D01G1726	PER33	2.04	4.77	1.22	1.77	2.34	1.26	1.52	1.32	0	1.88	1.72	3.84	2.79	2.29	4.58	7.02	4.31	5.77	2.15	1.96	3.01	0.56	2.93	3.05	3.49	2.49	3.38	1.16	0.6	0.47	4.33	3.31	3.16	2.89
Gh_A05G2347		PER34	4.27	NA	2.55	1.66	2.11	2.89	NA	NA	NA	NA	3.76	1.41	1.74	1.97	NA	NA	NA	NA	3.61	2.87	3.86	1.07	NA	NA	NA	NA	3.46	0.53	3.01	2.55	NA	NA	NA	NA
Gh_A08G2028	Gh_D08G2420	PER40	1.98	9.21	0.95	1.54	0.58	4.24	1.13	7.59	2.34	4.3	2.77	8.15	25.93	2.72	12.36	42.83	95.23	9.13	0.55	0	0	7.62	1.14	3.73	0.5	42.22	0.23	0.14	2.4	5.48	3.25	0.82	19.29	29.82
Gh_A12G0795	Gh_D12G0788	PER59	6.91	12.09	3.5	3.34	1.59	3.81	6.18	8.53	1.61	5.05	4.02	6.6	11.02	3.74	5.55	13.43	19.71	10.22	5.08	11.85	8.19	6.21	10.35	26.3	25.05	7.82	4.08	6.41	9.7	5.41	10.74	24.59	33.32	9.12
Gh_A06G1006	Gh_D06G1200	PER61	2.4	19.82	1.19	0.72	1.24	3.04	9.73	11.35	21.48	51.5	2.33	1.5	4.29	3.79	30.51	10.6	40.13	56.44	2.52	0.85	1.4	6.7	37.7	24.55	15.46	100.27	1.48	1.45	1.4	2.18	26.55	19.72	18.88	50.29
Gh_A02G0651	Gh_D02G0695	PER62	4.48	54.35	1.58	2	1.2	3.05	28.25	47.44	24.48	25.7	3.96	3.5	8.09	5.39	61.62	44.29	96.03	97.75	4.76	5.06	4.07	10.42	46.53	58.64	29.22	156.26	2.72	2.47	6.44	3.48	49.83	45.24	57.85	67.89
Gh_A05G3239		PER66	25.57	NA	40.52	107.77	57.52	46.82	NA	NA	NA	NA	91.05	51.21	39.2	14.54	NA	NA	NA	NA	38.63	13.94	5.85	10.2	NA	NA	NA	NA	48.37	16.4	13.75	28.81	NA	NA	NA	NA
Gh_A05G0507	Gh_D05G0626	PER81	3.23	2.1	0.35	0.5	9.05	1.82	0.69	0	11.97	0.72	0.61	0.45	1.62	3.84	0.59	0.22	1.31	2.95	6.15	0.41	4.24	0.67	6.08	0.2	5.42	0.11	0.81	3.91	0	0.14	0.79	5.02	0.43	0
