# Supplementary material for: Deep Transcriptome Analysis Reveals Reactive Oxygen Species (ROS) Network Evolution, Response to Abiotic Stress, and Regulation of Fiber Development in Cotton
Source: Int J Mol Sci. 2019 Apr 15;20(8):1863. doi: 10.3390/ijms20081863 (PMC6514600; doi:10.3390/ijms20081863)
Supplement: Supplementary file 1 [file ijms-20-01863-s001.zip › Supplementary files/Table S6.xlsx]

## Sheet: Sheet1
Table S6: Summary of the results of RNA-seq and map to the G. hirsutum genome.
Sample	Time	Raw Reads (M)	Clean Reads (M)	GC	Mapped reads (%)	Unique mapped reads (%)
				(%)
CRI12L	0h	45.08	44.84	44.69	0.8961	0.8176
CRI12L	3h	36.37	36.17	44.84	0.8762	0.8042
CRI12L	12h	54.17	53.67	44.13	0.8847	0.8032
CRI12L	48h	46.78	46.37	44.3	0.8951	0.8227
CRI12R	0h	49.35	48.8	43.92	0.8673	0.8054
CRI12R	3h	41.63	41.35	43.99	0.8306	0.774
CRI12R	12h	48.59	48.12	44.7	0.8606	0.8025
CRI12R	48h	40.99	40.61	43.98	0.8729	0.8128
M85L	0h	57.5	57.16	44.62	0.8871	0.8098
M85L	3h	38.57	38.29	44.23	0.8929	0.822
M85L	12h	44.01	43.58	44.02	0.8973	0.8212
M85L	48h	37.32	36.97	44.62	0.8906	0.8142
M85R	0h	46.32	45.88	43.97	0.8388	0.7779
M85R	3h	38.21	37.87	43.94	0.883	0.823
M85R	12h	39.97	39.62	43.52	0.8565	0.7982
M85R	48h	54.37	53.97	43.34	0.8831	0.8222
