# Supplementary material for: Deep Transcriptome Analysis Reveals Reactive Oxygen Species (ROS) Network Evolution, Response to Abiotic Stress, and Regulation of Fiber Development in Cotton
Source: Int J Mol Sci. 2019 Apr 15;20(8):1863. doi: 10.3390/ijms20081863 (PMC6514600; doi:10.3390/ijms20081863)
Supplement: Supplementary file 1 [file ijms-20-01863-s001.zip › Supplementary files/Table S7.xlsx]

## Sheet: Sheet1
Table S7: Gene accession number and samples information of transcriptome data used in our research
Organism	Strain	Tissue	Stage	Treatment	Experiment	Project ID	SRA Run ID
G. hirsutum	TM-1	Fiber	5 days post-anthesis	-	Fiber development, time-series	SRP044705	SRR1695191;
G. hirsutum	TM-1	Fiber	10 days post-anthesis	-	Fiber development, time-series	SRP044705	SRR1695192;
G. hirsutum	TM-1	Fiber	20 days post-anthesis	-	Fiber development, time-series	SRP044705	SRR1695193;
G. hirsutum	TM-1	Fiber	25 days post-anthesis	-	Fiber development, time-series	SRP044705	SRR1695194;
G. hirsutum	TM-1	Leaf	-	Control Group	Stress experiment, compare with control group	SRP044705	SRR1768521; SRR1768522; SRR1768523; SRR1768524;
G. hirsutum	TM-1	Leaf	-	Cold Treated, 4°C, 1,3,6,12 hours	Stress experiment, compare with control group	SRP044705	SRR1768504; SRR1768505; SRR1768506; SRR1768507;
G. hirsutum	TM-1	Leaf	-	Hot Treated, 38°C, 1,3,6,12 hours	Stress experiment, compare with control group	SRP044705	SRR1768508; SRR1768509; SRR1768510; SRR1768511;
G. hirsutum	TM-1	Leaf	-	PEG(Drought) treated, 20% PEG, 1,3,6,12 hours	Stress experiment, compare with control group	SRP044705	SRR1768516; SRR1768517; SRR1768518; SRR1768519;
G. hirsutum	TM-1	Leaf	-	Salt treated, 400mM NaCl, 1,3,6,12 hours	Stress experiment, compare with control group	SRP044705	SRR1768512; SRR1768513; SRR1768514; SRR1768515;
G. hirsutum	TM-1	Leaf	-	Cold Treated, 4°C, 1 hour	Stress experiment, compare in time-series	SRP044705	SRR1768504;
G. hirsutum	TM-1	Leaf	-	Cold Treated, 4°C, 3 hours	Stress experiment, compare in time-series	SRP044705	SRR1768505;
G. hirsutum	TM-1	Leaf	-	Cold Treated, 4°C, 6 hours	Stress experiment, compare in time-series	SRP044705	SRR1768506;
G. hirsutum	TM-1	Leaf	-	Cold Treated, 4°C, 12 hours	Stress experiment, compare in time-series	SRP044705	SRR1768507;
G. hirsutum	TM-1	Leaf	-	Hot Treated, 38°C, 1 hour	Stress experiment, compare in time-series	SRP044705	SRR1768508;
G. hirsutum	TM-1	Leaf	-	Hot Treated, 38°C, 3 hours	Stress experiment, compare in time-series	SRP044705	SRR1768509;
G. hirsutum	TM-1	Leaf	-	Hot Treated, 38°C, 6 hours	Stress experiment, compare in time-series	SRP044705	SRR1768510;
G. hirsutum	TM-1	Leaf	-	Hot Treated, 38°C, 12 hours	Stress experiment, compare in time-series	SRP044705	SRR1768511;
G. hirsutum	TM-1	Leaf	-	PEG(Drought) treated, 20% PEG, 1 hour	Stress experiment, compare in time-series	SRP044705	SRR1768516;
G. hirsutum	TM-1	Leaf	-	PEG(Drought) treated, 20% PEG, 3 hours	Stress experiment, compare in time-series	SRP044705	SRR1768517;
G. hirsutum	TM-1	Leaf	-	PEG(Drought) treated, 20% PEG, 6 hours	Stress experiment, compare in time-series	SRP044705	SRR1768518;
G. hirsutum	TM-1	Leaf	-	PEG(Drought) treated, 20% PEG, 12 hours	Stress experiment, compare in time-series	SRP044705	SRR1768519;
G. hirsutum	TM-1	Leaf	-	Salt treated, 400mM NaCl, 1 hour	Stress experiment, compare in time-series	SRP044705	SRR1768512;
G. hirsutum	TM-1	Leaf	-	Salt treated, 400mM NaCl, 3 hours	Stress experiment, compare in time-series	SRP044705	SRR1768513;
G. hirsutum	TM-1	Leaf	-	Salt treated, 400mM NaCl, 6 hours	Stress experiment, compare in time-series	SRP044705	SRR1768514;
G. hirsutum	TM-1	Leaf	-	Salt treated, 400mM NaCl, 12 hours	Stress experiment, compare in time-series	SRP044705	SRR1768515;
G. raimondii	-	Fiber	10 days post-anthesis	-	Fiber development, time-series	SRP001603	SRR203240;
G. raimondii	-	Fiber	20 days post-anthesis	-	Fiber development, time-series	SRP001603	SRR203250;
G. arboreum	-	Fiber	10 days post-anthesis	-	Fiber development, time-series	SRP001603	SRR203241;
G. arboreum	-	Fiber	20 days post-anthesis	-	Fiber development, time-series	SRP001603	SRR203245;
