# Supplementary material for: Deep Transcriptome Analysis Reveals Reactive Oxygen Species (ROS) Network Evolution, Response to Abiotic Stress, and Regulation of Fiber Development in Cotton
Source: Int J Mol Sci. 2019 Apr 15;20(8):1863. doi: 10.3390/ijms20081863 (PMC6514600; doi:10.3390/ijms20081863)
Supplement: Supplementary file 1 [file ijms-20-01863-s001.zip › Supplementary files/Table S8.xlsx]

## Sheet: Sheet1
Table S8: Genes of ROS network within 2Mb (±1Mb) of association signals
Association signals of GWAS			Genes within 2Mb (±1Mb) of association signals
Chromosome	Index	Location	Gene ID	Start	End
A01	FE	19693928	Gh_A01G0845	19440294	19443475
A03	SI	97692792	Gh_A03G1663	97801284	97802734
A05	LP	12172348	Gh_A05G1233	12432322	12432729
A06	SI	27385990	Gh_A06G0776	27623909	27624283
A06	LP	27795472	Gh_A06G0776	27623909	27624283
A07	FE	10348007	Gh_A07G0716	10937335	10939615
A08	BW	18961999	Gh_A08G0712	18361761	18367521
A09	BN	63628106	Gh_A09G1202	63774095	63775448
A10	FS	7589574	Gh_A10G0565	7031511	7032708
A10	SI	95026078	Gh_A10G1862	94927832	94931120
A10	SI	95026078	Gh_A10G1891	95321336	95323420
A11	BN	429879	Gh_A11G0026	290341	293279
A11	BW	8709702	Gh_A11G0819	8188056	8191838
A11	FE	15986015	Gh_A11G1243	15483262	15486021
A11	FU	24248565	Gh_A11G1655	25192076	25193226
A11	LP	25228040	Gh_A11G1669	25291980	25293232
A11	FL	60542530	Gh_A11G2043	63260806	63261288
A11	FL	63389724	Gh_A11G2043	63260806	63261288
A11	FS	68009704	Gh_A11G2096	67392336	67395193
A12	FS	69498972	Gh_A12G1300	68759986	68760324
A13	FE	39665812	Gh_A13G0827	39429685	39431204
A13	FE	65896437	Gh_A13G1223	65545613	65547289
A13	FE	75463332	Gh_A13G1654	75449686	75450078
A13	FS	75463913	Gh_A13G1654	75449686	75450078
A13	FL	75473149	Gh_A13G1654	75449686	75450078
D01	FU	36722584	Gh_D01G1310	36863811	36864806
D01	FU	60914905	Gh_D01G2119	60245797	60248953
D03	BW	1424880	Gh_D03G0074	531888	534705
D03	LP	35858092	Gh_D03G1062	35789027	35795976
D05	FE	5778971	Gh_D05G0626	5026931	5028271
D05	FE	14702113	Gh_D05G1626	14640100	14641647
D05	FE	14702113	Gh_D05G1662	14893737	14896472
D05	BW	24174044	Gh_D05G2413	24154306	24157207
D05	BW	24174044	Gh_D05G2471	24821383	24825199
D05	SI	56063689	Gh_D05G3451	56352666	56354805
D06	VW	11815621	Gh_D06G0720	12445573	12448647
D06	FU	17623836	Gh_D06G0900	17811598	17811972
D07	SI	48436385	Gh_D07G1961	48857715	48857954
D08	FM	60159948	Gh_D08G2095	59806893	59810058
D09	FM	6574370	Gh_D09G0198	6265013	6265687
D10	FE	2308060	Gh_D10G0264	2281347	2281802
D10	FS	49578322	Gh_D10G1784	50389073	50391342
D12	FE	51462199	Gh_D12G1807	50585049	50592640
D12	BN	57586077	Gh_D12G2504	57927732	57929447
D13	BW	1906204	Gh_D13G0259	2486695	2490672
D13	SI	8593705	Gh_D13G0600	8345288	8348000
D13	SI	8593705	Gh_D13G0608	8466942	8472142
Note: FE, Fiber elongation; FL, Fiber length; FM, Fiber micronaire; FS, Fiber strength; FU, Fiber uniformity; BN, Boll number; BW, Boll weight; LP, lint percentage; SI, seed idex; VW, Verticillium wilt.
